# Supplementary material for: Modified cinchona alkaloid-catalysed enantioselective [4+4] annulations of cyclobutenones and 1-azadienes
Source: Royal Society of Chemistry journal article supplement (doi:10.1039/d0cc02836c), 2020-01-01
Supplement: d0cc02836c1.pdf [file d0cc02836c1.pdf]

# **Modified Cinchona Alkaloid-Catalysed Enantioselective [4 + 4] Annulations of Cyclobutenones and 1-Azadienes**

Bo Jiang,<sup>a</sup> Wei Du,<sup>\*a</sup> and Ying-Chun Chen<sup>\*a,b</sup>

<sup>a</sup> Key Laboratory of Drug-Targeting and Drug Delivery System of the Ministry of Education and Sichuan Research Center for Drug Precision Industrial Technology, West China School of Pharmacy, Sichuan University, Chengdu 610041, China

<sup>b</sup> College of Pharmacy, Third Military Medical University, Shapingba, Chongqing 400038, China.

Fax: (+86)-28-8550-2609

Email: duweiyb@scu.edu.cn; ycchen@scu.edu.cn

## **Supplementary Information**

|                                                                                                                                    |            |
|------------------------------------------------------------------------------------------------------------------------------------|------------|
| <b>1. General methods .....</b>                                                                                                    | <b>S2</b>  |
| <b>2. Typical procedure for the preparation of indanone-derived substrate 2q.....</b>                                              | <b>S3</b>  |
| <b>3. General procedure for asymmetric tertiary amine catalysed [4 + 4] annulations of cyclobutenones 1 and 1-azadienes 2.....</b> | <b>S3</b>  |
| <b>4. Asymmetric reaction on a 1.0 mmol scale .....</b>                                                                            | <b>S19</b> |
| <b>5. Transformations of product 3a .....</b>                                                                                      | <b>S19</b> |
| <b>6. More screening studies on diverse cyclobutenones and 4C-type substrates.....</b>                                             | <b>S21</b> |
| <b>7. Crystal data and structural refinement for enantiopure 3y.....</b>                                                           | <b>S24</b> |
| <b>8. NMR spectra and HPLC chromatograms .....</b>                                                                                 | <b>S26</b> |

## 1. General methods

NMR data were obtained for  $^1\text{H}$  at 400 MHz or 600 MHz, and for  $^{13}\text{C}$  at 100 MHz. Chemical shifts were reported in ppm from tetramethylsilane with the solvent resonance as the internal standard in  $\text{CDCl}_3$  solution. ESI HRMS was recorded on a Waters SYNAPT G2. In each case, enantiomeric ratio was determined by HPLC analysis on a chiral column in comparison with the authentic racemate, using a Daicel Chiralpak AD-H Column ( $250 \times 4.6$  mm), Chiralpak IB Column ( $250 \times 4.6$  mm), Chiralpak IE Column ( $250 \times 4.6$  mm) or Chiralpak IC Column ( $250 \times 4.6$  mm). UV detection was monitored at 254 nm. Column chromatography was performed on silica gel (200-300 mesh) eluting with ethyl acetate (EtOAc) and petroleum ether or dichloromethane (DCM)/methanol (MeOH). TLC was performed on glass-backed silica plates. UV light, solution of potassium permanganate were used to visualize products or starting materials. All chemicals were used without purification as commercially available unless otherwise noted. Petroleum ether were redistilled. Cyclobutenones **1**,<sup>1</sup> 1-azadienes **2a–2p**,<sup>2</sup> chiral tertiary amine catalysts **C1** and **C3**<sup>3</sup> were synthesized following the literature procedures.

- (1) (a) K. Sugimoto, R. Hayashi, H. Nemoto, N. Toyooka and Y. Matsuya, *Org. Lett.*, 2012, **14**, 3510; (b) B.-S. Li, Y. Wang, Z. Jin, P. Zheng, R. Ganguly and Y. R. Chi, *Nat. Commun.*, 2015, **6**, 6027.
- (2) (a) Z. Q. Rong, M. Wang, C. H. E. Chow and Y. Zhao, *Chem. - Eur. J.*, 2016, **22**, 9483; (b) Z. Gu, J. Zhou, G.-F. Jiang and Y.-G. Zhou, *Org. Chem. Front.*, 2018, **5**, 1148.
- (3) (a) M. Shi, Z.-Y. Lei, M.-X. Zhao and J.-W. Shi, *Tetrahedron Lett.*, 2007, **48**, 5743; (b) W.-Q. Jia, X.-Y. Chen, L.-H. Sun and S. Ye, *Org. Biomol. Chem.*, 2014, **12**, 2167.

## 2. Typical procedure for the preparation of indanone-derived substrate **2q**

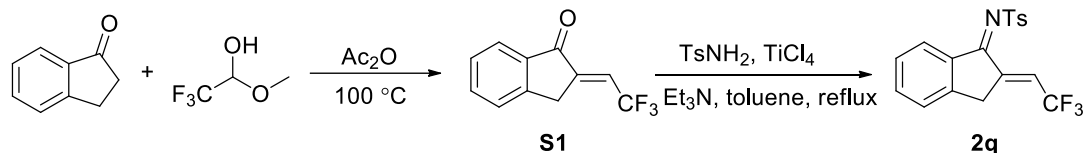

To a stirred solution of indanone (1.3 g, 10 mmol) in Ac<sub>2</sub>O (5 mL) in a sealed tube was added 2,2,2-trifluoro-1-methoxyethanol (2.86 mL, 30 mmol). The resulting mixture was warmed to 100 °C and stirred for 24 h. After cooling down to room temperature, the mixture was transferred into a separatory funnel and saturated aqueous NaHCO<sub>3</sub> (100 mL) and diethyl ether (100 mL) were added. The organic layer was separated, dried over anhydrous Na<sub>2</sub>SO<sub>4</sub>, and evaporated under reduced pressure. The residue was purified by column chromatography (SiO<sub>2</sub>; petroleum ether/EtOAc = 30/1) to give **S1** as a yellow solid (710 mg, 33% yield).

A solution of **S1** (710 mg, 1.0 equiv) and TsNH<sub>2</sub> (515 mg, 0.9 equiv) in toluene was added to a two necked flask equipped with a magnetic stirring bar and a condenser. Then Et<sub>3</sub>N (0.85 mL, 2.0 equiv) and TiCl<sub>4</sub> (0.33 mL, 0.9 equiv) were added successively at 0 °C under argon atmosphere, and the mixture was heated for reflux for 5 h. The solution was cooled to room temperature, quenched with water and extracted with DCM. The organic layer was separated, dried over anhydrous Na<sub>2</sub>SO<sub>4</sub>, filtered and evaporated under reduced pressure. The crude product was purified by column chromatography (SiO<sub>2</sub>; petroleum ether/EtOAc = 20/1) to give 4-methyl-*N*-((*E*)-2-(2,2,2-trifluoroethylidene)-2,3-dihydro-1*H*-inden-1-ylidene)benzenesulfonamide **2q** (284.3 mg, 24% yield).

**2q**: yellow solid, mp 137–138 °C; <sup>1</sup>H NMR (400 MHz, CDCl<sub>3</sub>): δ (ppm) 8.92 (s, 1H), 7.96 (d, *J* = 8.2 Hz, 2H), 7.75–7.63 (m, 1H), 7.53 (t, *J* = 7.6 Hz, 2H), 7.38 (d, *J* = 8.0 Hz, 2H), 6.75 (s, 1H), 3.98 (t, *J* = 2.9 Hz, 2H), 2.48 (s, 3H); <sup>13</sup>C NMR (100 MHz, CDCl<sub>3</sub>): δ (ppm) 172.5, 149.8 (q, *J*<sub>FC</sub> = 3.4 Hz), 143.7, 138.8, 136.4, 131.2 (q, *J*<sub>FC</sub> = 14.5 Hz), 129.5, 128.5, 126.9, 125.9, 124.5, 121.8, 106.1 (q, *J*<sub>FC</sub> = 253.9 Hz), 31.9, 21.6; <sup>19</sup>F NMR (376 MHz, CDCl<sub>3</sub>): δ (ppm) –60.2.

## 3. General procedure for asymmetric tertiary amine catalysed [4 + 4] annulations of cyclobutenones **1** and 1-azadienes **2**

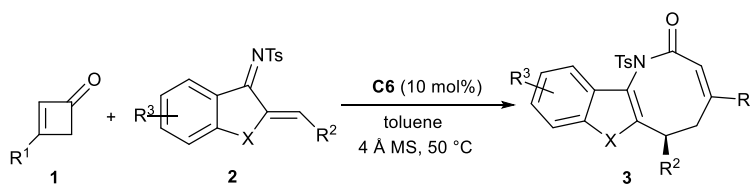

**General procedure A:** To a solution of cyclobutenone **1** (0.15 mmol, 1.5 equiv), catalyst **C6** (7.8 mg, 10 mol%) and 4 Å MS (100.0 mg) in toluene (1.0 mL) was added 1-azadiene **2** (0.1 mmol,

1.0 equiv). The mixture was stirred at 50 °C. After completion (monitored by TLC, EtOAc/petroleum ether = 1/15), the pure product **3** was obtained by flash chromatography on silica gel (EtOAc/petroleum ether = 1/17). **3z** and **3aa** were obtained after recrystallisation by ethanol/petroleum ether for further purification.

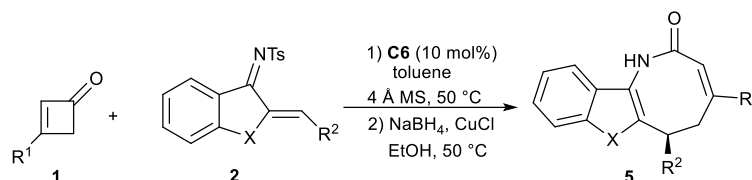

**General procedure B:** To a solution of cyclobutenone **1** (0.15 mmol, 1.5 equiv), catalyst **C6** (7.8 mg, 10 mol%) and 4 Å MS (100.0 mg) in toluene (1.0 mL) was added 1-azadiene **2** (0.1 mmol, 1.0 equiv). The mixture was stirred at 50 °C. After completion (monitored by TLC, EtOAc/petroleum ether = 1/15), the crude annulation product was purified by flash chromatography on silica gel (EtOAc/petroleum ether = 1/17). Then the crude product was added to a solution of CuCl (4.0 equiv) in EtOH, and NaBH<sub>4</sub> (4.0 equiv) was added in one portion. The mixture was stirred at 50 °C for 2–4 h. After completion (monitored by TLC, EtOAc/petroleum ether = 1/6), the mixture was concentrated and the pure product **5** was obtained by flash chromatography on silica gel (EtOAc/petroleum ether = 1/8).

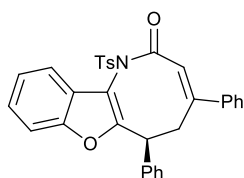

**Synthesis of 3a: General procedure A:** To a solution of cyclobutenone **1a** (21.6 mg, 0.15 mmol, 1.5 equiv), catalyst **C6** (7.8 mg, 10 mol%) and 4 Å MS (100.0 mg) in toluene (1.0 mL) was added 1-azadiene **2a** (37.5 mg, 0.1 mmol, 1.0 equiv). The mixture was stirred at 50 °C for 48 h. After completion, it was purified by flash chromatography on silica gel (EtOAc/petroleum ether = 1/17) to give product **3a**: 51.7 mg, 99% yield, white solid; mp 106–108 °C;  $[\alpha]_D^{25} = +336.8$  ( $c = 0.25$  in CHCl<sub>3</sub>); 98% ee, determined by HPLC analysis [Chiralpak IC, *n*-hexane/*i*-PrOH = 60/40, 1.0 mL/min,  $\lambda = 254$  nm,  $t$  (major) = 7.82 min,  $t$  (minor) = 12.00 min]; <sup>1</sup>H NMR (400 MHz, CDCl<sub>3</sub>):  $\delta$  (ppm) 8.05 (d,  $J = 8.4$  Hz, 2H), 7.63–7.60 (m, 1H), 7.50–7.47 (m, 2H), 7.45–7.40 (m, 2H), 7.38–7.33 (m, 7H), 7.31–7.26 (m, 4H), 6.10 (s, 1H), 4.35 (dd,  $J = 14.0, 4.8$  Hz, 1H), 3.50–3.31 (m, 1H), 3.11 (ddd,  $J = 14.0, 4.8, 1.2$  Hz, 1H), 2.43 (s, 3H); <sup>13</sup>C NMR (100 MHz, CDCl<sub>3</sub>):  $\delta$  (ppm) 167.9, 154.5, 152.8, 148.6, 145.5, 140.1, 138.0, 135.2, 130.1, 129.5, 129.3, 129.1, 129.0, 127.6, 127.5, 127.2, 126.2, 125.1, 123.6, 121.0, 119.9, 116.5, 111.5, 43.7, 36.4, 21.7; ESI-HRMS: calcd. for C<sub>32</sub>H<sub>25</sub>NO<sub>4</sub>S + H<sup>+</sup> 520.1583, found 520.1578.



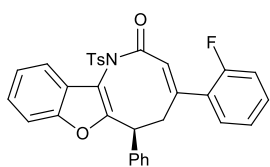

**Synthesis of 3b: General procedure A:** To a solution of cyclobutenone **1b** (24.3 mg, 0.15 mmol, 1.5 equiv), catalyst **C6** (7.8 mg, 10 mol%) and 4 Å MS (100.0 mg) in toluene (1.0 mL) was added 1-azadiene **2a** (37.5 mg, 0.1 mmol, 1.0 equiv). The mixture was stirred at 50 °C for 48 h (after 24 h, another 0.5

equiv cyclobutenone **1b** was added). After completion, it was purified by flash chromatography on silica gel (EtOAc/petroleum ether = 1/17) to give product **3b**: 40.6 mg, 76% yield, white solid; mp 184–187 °C;  $[\alpha]_D^{25} = +228.8$  ( $c = 0.25$  in  $\text{CHCl}_3$ ); 99% ee, determined by HPLC analysis [Chiralpak IC,  $n$ -hexane/ $i$ -PrOH = 60/40, 1.0 mL/min,  $\lambda = 254$  nm,  $t$  (major) = 6.45 min,  $t$  (minor) = 9.54 min];  $^1\text{H}$  NMR (400 MHz,  $\text{CDCl}_3$ ):  $\delta$  (ppm) 8.02 (d,  $J = 8.4$  Hz, 2H), 7.67–7.63 (m, 1H), 7.45–7.37 (m, 6H), 7.35–7.29 (m, 3H), 7.27 (d,  $J = 8.2$  Hz, 2H), 7.12–7.02 (m, 3H), 5.99 (s, 1H), 4.35 (dd,  $J = 14.0$ , 4.8 Hz, 1H), 3.42–3.28 (m, 1H), 3.03 (ddd,  $J = 14.0$ , 4.8, 1.2 Hz, 1H), 2.43 (s, 3H);  $^{13}\text{C}$  NMR (100 MHz,  $\text{CDCl}_3$ ):  $\delta$  (ppm) 167.7, 163.5 (d,  $J_{\text{FC}} = 248.8$  Hz), 154.4, 152.8, 147.6, 145.6, 139.9, 135.2, 134.1 (d,  $J_{\text{FC}} = 3.6$  Hz), 130.2, 129.4, 129.2, 128.2 (d,  $J_{\text{FC}} = 8.2$  Hz), 127.7, 127.5, 127.2, 125.1, 123.6, 121.0, 119.9, 116.5, 116.0 (d,  $J_{\text{FC}} = 21.6$  Hz), 111.5, 43.7, 36.5, 21.7;  $^{19}\text{F}$  NMR (376 MHz,  $\text{CDCl}_3$ ):  $\delta$  (ppm) –113.4; ESI-HRMS: calcd. for  $\text{C}_{32}\text{H}_{24}\text{FNO}_4\text{S} + \text{H}^+$  538.1488, found 538.1496.

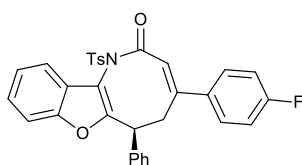

**Synthesis of 3c: General procedure A:** To a solution of cyclobutenone **1c** (24.3 mg, 0.15 mmol, 1.5 equiv), catalyst **C6** (7.8 mg, 10 mol%) and 4 Å MS (100.0 mg) in toluene (1.0 mL) was added 1-azadiene **2a** (37.5 mg, 0.1 mmol, 1.0 equiv). The mixture was stirred at 50 °C for 36 h. After

completion, it was purified by flash chromatography on silica gel (EtOAc/petroleum ether = 1/17) to give product **3c**: 53.5 mg, 99% yield, white solid; mp 119–120 °C;  $[\alpha]_D^{25} = +227.2$  ( $c = 0.25$  in  $\text{CHCl}_3$ ); 99% ee, determined by HPLC analysis [Chiralpak IC,  $n$ -hexane/ $i$ -PrOH = 60/40, 1.0 mL/min,  $\lambda = 254$  nm,  $t$  (major) = 7.53 min,  $t$  (minor) = 11.85 min];  $^1\text{H}$  NMR (400 MHz,  $\text{CDCl}_3$ ):  $\delta$  (ppm) 8.04 (d,  $J = 8.4$  Hz, 2H), 7.64–7.58 (m, 1H), 7.51–7.40 (m, 4H), 7.38–7.27 (m, 8H), 7.09–7.01 (m, 2H), 6.05 (s, 1H), 4.31 (dd,  $J = 14.0$ , 4.8 Hz, 1H), 3.44 (t,  $J = 14.0$  Hz, 1H), 3.05 (dd,  $J = 14.0$ , 4.0 Hz, 1H), 2.43 (s, 3H);  $^{13}\text{C}$  NMR (100 MHz,  $\text{CDCl}_3$ ):  $\delta$  (ppm) 167.7, 163.5 (d,  $J_{\text{FC}} = 248.9$  Hz), 154.4, 152.8, 147.6, 145.6, 139.9, 135.2, 134.1 (d,  $J_{\text{FC}} = 3.5$  Hz), 130.2, 129.4, 129.2, 128.2 (d,  $J_{\text{FC}} = 8.4$  Hz), 127.8, 127.5, 127.2, 125.2, 123.6, 121.0, 119.9, 116.5, 116.1 (d,  $J_{\text{FC}} = 21.6$  Hz), 111.5, 43.7, 36.6, 21.7;  $^{19}\text{F}$  NMR (376 MHz,  $\text{CDCl}_3$ ):  $\delta$  (ppm) –111.2; ESI-HRMS: calcd. for  $\text{C}_{32}\text{H}_{24}\text{FNO}_4\text{S} + \text{Na}^+$  560.1308, found 560.1308.

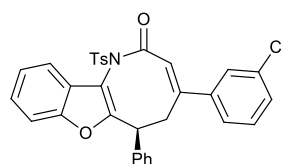

**Synthesis of 3d: General procedure A:** To a solution of cyclobutenone **1d** (26.7 mg, 0.15 mmol, 1.5 equiv), catalyst **C6** (7.8 mg, 10 mol%) and 4 Å MS (100.0 mg) in toluene (1.0 mL) was added 1-azadiene **2a** (37.5 mg, 0.1

mmol, 1.0 equiv). The mixture was stirred at 50 °C for 48 h. After completion, it was purified by flash chromatography on silica gel (EtOAc/petroleum ether = 1/17) to give product **3d**: 55.2 mg, 99% yield, white solid; mp 98–100 °C;  $[\alpha]_D^{25} = +201.6$  ( $c = 0.25$  in  $\text{CHCl}_3$ ); 98% ee, determined by HPLC analysis [Chiralpak IC, *n*-hexane/*i*-PrOH = 60/40, 1.0 mL/min,  $\lambda = 254$  nm,  $t$  (major) = 7.61 min,  $t$  (minor) = 12.19 min];  $^1\text{H}$  NMR (400 MHz,  $\text{CDCl}_3$ ):  $\delta$  (ppm) 8.04 (d,  $J = 8.4$  Hz, 2H), 7.64–7.59 (m, 1H), 7.50–7.40 (m, 4H), 7.38–7.27 (m, 8H), 7.25–7.20 (m, 2H), 6.08 (s, 1H), 4.32 (dd,  $J = 14.0, 4.8$  Hz, 1H), 3.41 (t,  $J = 14.0$  Hz, 1H), 3.04 (ddd,  $J = 14.0, 4.8, 1.2$  Hz, 1H), 2.42 (s, 3H);  $^{13}\text{C}$  NMR (100 MHz,  $\text{CDCl}_3$ ):  $\delta$  (ppm) 167.5, 154.3, 152.9, 147.2, 145.7, 140.1, 139.9, 135.2, 135.1, 130.3, 130.2, 129.6, 129.4, 129.3, 127.8, 127.6, 127.2, 126.5, 125.3, 124.5, 123.7, 122.1, 119.9, 116.5, 111.6, 43.7, 36.4, 21.8; ESI-HRMS: calcd. for  $\text{C}_{32}\text{H}_{24}\text{ClNO}_4\text{S} + \text{Na}^+$  576.1012 ( $^{35}\text{Cl}$ ), 577.1046 ( $^{37}\text{Cl}$ ), found 576.1019, 577.1054.

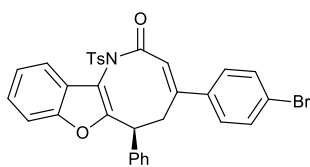

**Synthesis of 3e: General procedure A:** To a solution of cyclobutenone **1e** (33.5 mg, 0.15 mmol, 1.5 equiv), catalyst **C6** (7.8 mg, 10 mol%) and 4 Å MS (100.0 mg) in toluene (1.0 mL) was added 1-azadiene **2a** (37.5 mg, 0.1 mmol, 1.0 equiv). The mixture was stirred at 50 °C for 24 h. After

completion, it was purified by flash chromatography on silica gel (EtOAc/petroleum ether = 1/17) to give product **3e**: 59.3 mg, 99% yield, white solid; mp 119–120 °C;  $[\alpha]_D^{25} = +186.4$  ( $c = 0.25$  in  $\text{CHCl}_3$ ); 99% ee, determined by HPLC analysis [Chiralpak IC, *n*-hexane/*i*-PrOH = 60/40, 1.0 mL/min,  $\lambda = 254$  nm,  $t$  (major) = 7.80 min,  $t$  (minor) = 12.52 min];  $^1\text{H}$  NMR (400 MHz,  $\text{CDCl}_3$ ):  $\delta$  (ppm) 8.04 (d,  $J = 8.4$  Hz, 2H), 7.63–7.58 (m, 1H), 7.50–7.45 (m, 4H), 7.45–7.39 (m, 2H), 7.37–7.32 (m, 2H), 7.31–7.27 (m, 3H), 7.25–7.19 (m, 3H), 6.08 (d,  $J = 1.2$  Hz, 1H), 4.30 (dd,  $J = 14.0, 4.8$  Hz, 1H), 3.48–3.34 (m, 1H), 3.04 (ddd,  $J = 14.0, 4.8, 1.2$  Hz, 1H), 2.42 (s, 3H);  $^{13}\text{C}$  NMR (100 MHz,  $\text{CDCl}_3$ ):  $\delta$  (ppm) 167.2, 160.8, 158.3, 154.5, 152.9, 145.6, 144.9, 139.9, 135.1, 130.9, 130.1, 129.8, 129.4, 129.1, 127.5, 127.2, 125.1, 124.8, 124.5, 123.6, 119.9, 116.5, 111.5, 43.2, 37.5, 21.7; ESI-HRMS: calcd. for  $\text{C}_{32}\text{H}_{24}\text{BrNO}_4\text{S} + \text{Na}^+$  620.0507 ( $^{79}\text{Br}$ ), 622.0487 ( $^{81}\text{Br}$ ), found 620.0520, 622.0507.

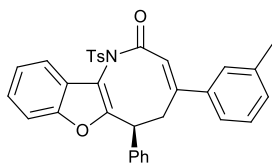

**Synthesis of 3f: General procedure A:** To a solution of cyclobutenone **1f** (23.7 mg, 0.15 mmol, 1.5 equiv), catalyst **C6** (7.8 mg, 10 mol%) and 4 Å MS (100.0 mg) in toluene (1.0 mL) was added 1-azadiene **2a** (37.5 mg, 0.1 mmol, 1.0 equiv). The mixture was stirred at 50 °C for 36 h. After completion, it was

purified by flash chromatography on silica gel (EtOAc/petroleum ether = 1/17) to give product **3f**: 51.3 mg, 96% yield, white solid; mp 89–91 °C;  $[\alpha]_D^{25} = +142.4$  ( $c = 0.25$  in  $\text{CHCl}_3$ ); 98% ee, determined by HPLC analysis [Chiralpak IC, *n*-hexane/*i*-PrOH = 60/40, 1.0 mL/min,  $\lambda = 254$  nm,  $t$  (major) = 7.37 min,  $t$  (minor) = 11.34 min];  $^1\text{H}$  NMR (400 MHz,  $\text{CDCl}_3$ ):  $\delta$  (ppm) 8.05 (d,  $J = 8.4$

Hz, 2H), 7.64–7.60 (m, 1H), 7.51–7.46 (m, 2H), 7.46–7.40 (m, 2H), 7.38–7.33 (m, 2H), 7.32–7.28 (m, 3H), 7.25–7.22 (m, 2H), 7.20–7.13 (m, 3H), 6.08 (s, 1H), 4.34 (dd,  $J = 14.0, 4.8$  Hz, 1H), 3.42 (t,  $J = 14.0$  Hz, 1H), 3.11 (ddd,  $J = 14.0, 4.8, 1.2$  Hz, 1H), 2.43 (s, 3H), 2.33 (s, 3H);  $^{13}\text{C}$  NMR (100 MHz,  $\text{CDCl}_3$ ):  $\delta$  (ppm) 167.9, 154.5, 152.8, 148.9, 145.5, 140.2, 138.7, 138.1, 135.2, 130.4, 130.2, 129.3, 129.1, 128.8, 127.6, 127.5, 127.2, 127.0, 125.0, 123.5, 123.3, 120.8, 119.9, 116.5, 111.5, 43.7, 36.4, 21.7, 21.4; ESI-HRMS: calcd. for  $\text{C}_{33}\text{H}_{27}\text{NO}_4\text{S} + \text{H}^+$  534.1739, found 534.1738.

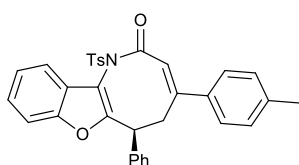

**Synthesis of 3g: General procedure A:** To a solution of cyclobutenone **1g** (23.7 mg, 0.15 mmol, 1.5 equiv), catalyst **C6** (7.8 mg, 10 mol%) and 4 Å MS (100.0 mg) in toluene (1.0 mL) was added 1-azadiene **2a** (37.5 mg, 0.1 mmol, 1.0 equiv). The mixture was stirred at 50 °C for 24 h. After

completion, it was purified by flash chromatography on silica gel (EtOAc/petroleum ether = 1/17) to give product **3g**: 52.6 mg, 98% yield, white solid; mp 104–105 °C;  $[\alpha]_{\text{D}}^{25} = +188$  ( $c = 0.25$  in  $\text{CHCl}_3$ ); 99% ee, determined by HPLC analysis [Chiralpak IC,  $n$ -hexane/ $i$ -PrOH = 60/40, 1.0 mL/min,  $\lambda = 254$  nm,  $t$  (major) = 7.93 min,  $t$  (minor) = 11.42 min];  $^1\text{H}$  NMR (400 MHz,  $\text{CDCl}_3$ ):  $\delta$  (ppm) 8.05 (d,  $J = 6.8$  Hz, 2H), 7.64–7.59 (m, 1H), 7.52–7.46 (m, 2H), 7.45–7.39 (m, 2H), 7.37–7.32 (m, 2H), 7.30–7.25 (m, 6H), 7.16 (d,  $J = 8.0$  Hz, 2H), 6.08 (s, 1H), 4.34 (ddd,  $J = 14.0, 4.4, 1.6$  Hz, 1H), 3.42 (t,  $J = 14.0$  Hz, 1H), 3.11 (dd,  $J = 14.0, 4.4$  Hz, 1H), 2.42 (s, 3H), 2.34 (s, 3H);  $^{13}\text{C}$  NMR (100 MHz,  $\text{CDCl}_3$ ):  $\delta$  (ppm) 168.0, 154.6, 152.8, 148.6, 145.5, 140.2, 139.9, 135.2, 134.9, 130.1, 129.7, 129.3, 129.1, 127.6, 127.5, 127.2, 126.1, 125.0, 123.5, 120.0, 119.9, 116.5, 111.5, 43.8, 36.2, 21.7, 21.1; ESI-HRMS: calcd. for  $\text{C}_{33}\text{H}_{27}\text{NO}_4\text{S} + \text{H}^+$  534.1739, found 534.1730.

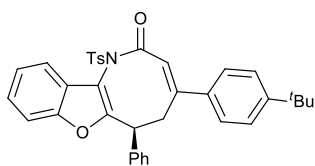

**Synthesis of 3h: General procedure A:** To a solution of cyclobutenone **1h** (30.0 mg, 0.15 mmol, 1.5 equiv), catalyst **C6** (7.8 mg, 10 mol%) and 4 Å MS (100.0 mg) in toluene (1.0 mL) was added 1-azadiene **2a** (37.5 mg, 0.1 mmol, 1.0 equiv). The mixture was stirred at 50 °C for 24 h. After

completion, it was purified by flash chromatography on silica gel (EtOAc/petroleum ether = 1/17) to give product **3h**: 57.3 mg, 99% yield, yellow solid; mp 126–128 °C;  $[\alpha]_{\text{D}}^{25} = +193.6$  ( $c = 0.25$  in  $\text{CHCl}_3$ ); 98% ee, determined by HPLC analysis [Chiralpak IC,  $n$ -hexane/ $i$ -PrOH = 60/40, 1.0 mL/min,  $\lambda = 254$  nm,  $t$  (major) = 6.63 min,  $t$  (minor) = 9.36 min];  $^1\text{H}$  NMR (400 MHz,  $\text{CDCl}_3$ ):  $\delta$  (ppm) 8.05 (d,  $J = 8.4$  Hz, 2H), 7.64–7.59 (m, 1H), 7.53–7.48 (m, 2H), 7.46–7.39 (m, 2H), 7.39–7.35 (m, 2H), 7.35–7.30 (m, 4H), 7.29–7.25 (m, 4H), 6.11 (s, 1H), 4.38 (ddd,  $J = 14.0, 4.8, 2.0$  Hz, 1H), 3.43 (td,  $J = 14.0, 2.0$  Hz, 1H), 3.19–3.09 (m, 1H), 2.41 (s, 3H), 1.30 (s, 9H);  $^{13}\text{C}$  NMR (100 MHz,  $\text{CDCl}_3$ ):  $\delta$  (ppm) 168.1, 154.6, 153.0, 152.8, 148.4, 145.5, 140.2, 135.3, 134.8, 130.1, 129.3, 129.1, 127.6, 127.5, 127.2, 125.9, 125.9, 125.0, 123.5, 120.1, 119.9, 116.5, 111.5, 43.8, 36.2, 34.7, 31.1, 21.7; ESI-HRMS:

calcd. for  $C_{36}H_{33}NO_4S + Na^+$  598.2028, found 598.2036.

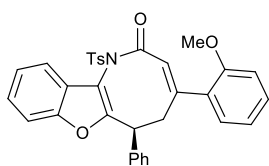

**Synthesis of 3i: General procedure A:** To a solution of cyclobutenone **1i** (26.1 mg, 0.15 mmol, 1.5 equiv), catalyst **C6** (7.8 mg, 10 mol%) and 4 Å MS (100.0 mg) in toluene (1.0 mL) was added 1-azadiene **2a** (37.5 mg, 0.1 mmol, 1.0 equiv). The mixture was stirred at 50 °C for 60 h (after 24 h, another 0.5

equiv cyclobutenone **1i** was added). After completion, it was purified by flash chromatography on silica gel (EtOAc/petroleum ether = 1/17) to give product **3i**: 36.8 mg, 67% yield, white solid; mp 96–98 °C;  $[\alpha]_D^{25} = +323.2$  ( $c = 1.5$  in  $CHCl_3$ ); 98% ee, determined by HPLC analysis [Chiralpak IC, *n*-hexane/*i*-PrOH = 60/40, 1.0 mL/min,  $\lambda = 254$  nm,  $t$  (major) = 7.17 min,  $t$  (minor) = 11.86 min];  $^1H$  NMR (400 MHz,  $CDCl_3$ ):  $\delta$  (ppm) 8.03 (d,  $J = 8.4$  Hz, 2H), 7.65–7.59 (m, 1H), 7.44–7.39 (m, 3H), 7.39–7.35 (m, 2H), 7.33–7.25 (m, 6H), 6.91–6.79 (m, 3H), 5.82 (s, 1H), 4.33 (dd,  $J = 14.0, 4.8$  Hz, 1H), 3.66 (s, 3H), 3.40–3.28 (m, 1H), 3.06 (ddd,  $J = 13.2, 4.8, 1.2$  Hz, 1H), 2.43 (s, 3H);  $^{13}C$  NMR (100 MHz,  $CDCl_3$ ):  $\delta$  (ppm) 167.8, 156.3, 155.3, 152.9, 149.2, 145.4, 140.3, 135.4, 130.1, 129.6, 129.3, 129.1, 129.0, 127.6, 127.4, 127.3, 124.9, 123.6, 123.5, 120.6, 119.9, 116.5, 111.4, 111.0, 55.3, 43.1, 37.8, 21.7; ESI-HRMS: calcd. for  $C_{33}H_{27}NO_5S + H^+$  550.1688, found 550.1683.

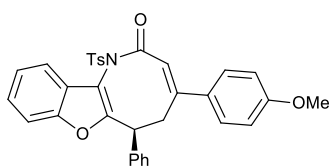

**Synthesis of 3j: General procedure A:** To a solution of cyclobutenone **1j** (26.1 mg, 0.15 mmol, 1.5 equiv), catalyst **C6** (7.8 mg, 10 mol%) and 4 Å MS (100.0 mg) in toluene (1.0 mL) was added 1-azadiene **2a** (37.5 mg, 0.1 mmol, 1.0 equiv). The mixture was stirred at 50 °C for 24 h. After

completion, it was purified by flash chromatography on silica gel (EtOAc/petroleum ether = 1/17) to give product **3j**: 54.3 mg, 99% yield, white solid; mp 106–107 °C;  $[\alpha]_D^{25} = +289.6$  ( $c = 0.25$  in  $CHCl_3$ ); 98% ee, determined by HPLC analysis [Chiralpak IC, *n*-hexane/*i*-PrOH = 60/40, 1.0 mL/min,  $\lambda = 254$  nm,  $t$  (major) = 10.53 min,  $t$  (minor) = 16.04 min];  $^1H$  NMR (400 MHz,  $CDCl_3$ ):  $\delta$  (ppm) 8.05 (d,  $J = 8.4$  Hz, 2H), 7.63–7.58 (m, 1H), 7.52–7.47 (m, 2H), 7.45–7.39 (m, 2H), 7.36–7.30 (m, 4H), 7.29–7.24 (m, 4H), 6.89–6.84 (m, 2H), 6.05 (s, 1H), 4.34 (dd,  $J = 14.0, 4.4$  Hz, 1H), 3.79 (s, 3H), 3.43 (t,  $J = 14.0$  Hz, 1H), 3.10 (dd,  $J = 14.0, 3.6$  Hz, 1H), 2.41 (s, 3H);  $^{13}C$  NMR (100 MHz,  $CDCl_3$ ):  $\delta$  (ppm) 168.1, 160.8, 154.6, 152.7, 148.2, 145.5, 140.2, 135.3, 130.9, 130.1, 129.9, 129.3, 129.1, 127.6, 127.5, 127.2, 125.0, 123.5, 119.9, 119.0, 116.5, 114.3, 111.4, 55.5, 43.8, 36.1, 21.6; ESI-HRMS: calcd. for  $C_{33}H_{27}NO_5S + H^+$  550.1688, found 550.1681.

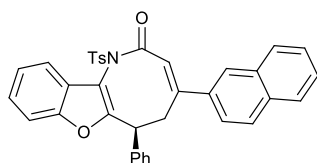

**Synthesis of 3k: General procedure A:** To a solution of cyclobutenone **1k** (29.1 mg, 0.15 mmol, 1.5 equiv), catalyst **C6** (7.8 mg, 10 mol%) and 4 Å MS (100.0 mg) in toluene (1.0 mL) was added 1-azadiene **2a** (37.5

mg, 0.1 mmol, 1.0 equiv). The mixture was stirred at 50 °C for 48 h. After completion, it was purified by flash chromatography on silica gel (EtOAc/petroleum ether = 1/17) to give product **3k**: 55.8 mg, 98% yield, white solid; mp 89–92 °C;  $[\alpha]_{\text{D}}^{25} = +174.4$  ( $c = 0.25$  in  $\text{CHCl}_3$ ); 99% ee, determined by HPLC analysis [Chiralpak IC,  $n$ -hexane/ $i$ -PrOH = 60/40, 1.0 mL/min,  $\lambda = 254$  nm,  $t$  (major) = 9.02 min,  $t$  (minor) = 14.81 min];  $^1\text{H}$  NMR (400 MHz,  $\text{CDCl}_3$ ):  $\delta$  (ppm) 8.07 (d,  $J = 8.4$  Hz, 2H), 7.86–7.78 (m, 4H), 7.67–7.62 (m, 1H), 7.53–7.47 (m, 4H), 7.47–7.41 (m, 3H), 7.35 (dt,  $J = 6.2, 1.2$  Hz, 2H), 7.32–7.27 (m, 4H), 6.24 (s, 1H), 4.40 (dd,  $J = 14.0, 4.4$  Hz, 1H), 3.52 (t,  $J = 14.0$  Hz, 1H), 3.31–3.23 (m, 1H), 2.43 (s, 3H);  $^{13}\text{C}$  NMR (100 MHz,  $\text{CDCl}_3$ ):  $\delta$  (ppm) 167.9, 154.6, 152.8, 148.5, 145.6, 140.1, 135.2, 135.1, 133.6, 133.1, 130.2, 129.3, 129.2, 128.8, 128.5, 127.7, 127.6, 127.5, 127.2, 127.1, 126.8, 125.9, 125.1, 123.59, 123.57, 121.3, 119.9, 116.5, 111.5, 43.8, 36.3, 21.7; ESI-HRMS: calcd. for  $\text{C}_{36}\text{H}_{27}\text{NO}_4\text{S} + \text{Na}^+$  592.1558, found 592.1552.

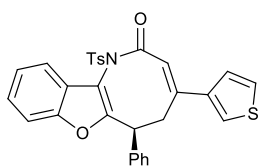

**Synthesis of 3l: General procedure A:** To a solution of cyclobutenone **1l** (22.5 mg, 0.15 mmol, 1.5 equiv), catalyst **C6** (7.8 mg, 10 mol%) and 4 Å MS (100.0 mg) in toluene (1.0 mL) was added 1-azadiene **2a** (37.5 mg, 0.1 mmol, 1.0 equiv). The mixture was stirred at 50 °C for 20 h. After completion, it was

purified by flash chromatography on silica gel (EtOAc/petroleum ether = 1/17) to give product **3l**: 51.3 mg, 98% yield, white solid; mp 191–192 °C;  $[\alpha]_{\text{D}}^{25} = +146.4$  ( $c = 0.25$  in  $\text{CHCl}_3$ ); 99% ee, determined by HPLC analysis [Chiralpak IC,  $n$ -hexane/ $i$ -PrOH = 60/40, 1.0 mL/min,  $\lambda = 254$  nm,  $t$  (major) = 9.42 min,  $t$  (minor) = 13.75 min];  $^1\text{H}$  NMR (400 MHz,  $\text{CDCl}_3$ ):  $\delta$  (ppm) 7.97 (dd,  $J = 8.4, 1.6$  Hz, 2H), 7.51–7.43 (m, 3H), 7.41–7.33 (m, 3H), 7.28–7.22 (m, 1H), 7.23–7.13 (m, 6H), 7.05 (dt,  $J = 5.2, 1.4$  Hz, 1H), 6.07 (s, 1H), 4.37 (ddd,  $J = 14.0, 4.4, 1.6$  Hz, 1H), 3.46–3.32 (m, 1H), 2.98 (dd,  $J = 14.0, 4.4$  Hz, 1H), 2.33 (s, 3H);  $^{13}\text{C}$  NMR (100 MHz,  $\text{CDCl}_3$ ):  $\delta$  (ppm) 168.0, 154.7, 152.8, 145.5, 142.6, 140.1, 139.5, 135.2, 130.1, 129.3, 129.2, 127.7, 127.5, 127.2, 127.1, 125.2, 125.1, 123.8, 123.5, 119.9, 119.2, 116.4, 111.4, 44.2, 36.3, 21.7; ESI-HRMS: calcd. for  $\text{C}_{30}\text{H}_{23}\text{NO}_4\text{S}_2 + \text{H}^+$  526.1147, found 526.1140.

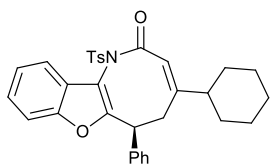

**Synthesis of 3m: General procedure A:** To a solution of cyclobutenone **1m** (22.5 mg, 0.15 mmol, 1.5 equiv), catalyst **C6** (7.8 mg, 10 mol%) and 4 Å MS (100.0 mg) in toluene (1.0 mL) was added 1-azadiene **2a** (37.5 mg, 0.1 mmol, 1.0 equiv). The mixture was stirred at 50 °C for 54 h (after 24 h, another 0.5

equiv cyclobutenone **1m** was added). After completion, it was purified by flash chromatography on silica gel (EtOAc/petroleum ether = 1/17) to give product **3m**: 50.2 mg, 95% yield, white solid; mp 98–100 °C;  $[\alpha]_{\text{D}}^{25} = +172$  ( $c = 0.25$  in  $\text{CHCl}_3$ ); 99% ee, determined by HPLC analysis [Chiralpak IC,  $n$ -hexane/ $i$ -PrOH = 60/40, 1.0 mL/min,  $\lambda = 254$  nm,  $t$  (major) = 6.93 min,  $t$  (minor) = 11.80 min];  $^1\text{H}$

NMR (400 MHz, CDCl<sub>3</sub>):  $\delta$  (ppm) 7.99 (d,  $J$  = 8.4 Hz, 2H), 7.58–7.55 (m, 1H), 7.51–7.47 (m, 2H), 7.45–7.39 (m, 2H), 7.39–7.26 (m, 4H), 7.25 (d,  $J$  = 1.2 Hz, 1H), 7.24–7.22 (m, 1H), 5.64 (d,  $J$  = 1.0 Hz, 1H), 4.37 (dd,  $J$  = 14.0, 4.8 Hz, 1H), 3.14–3.02 (m, 1H), 2.58–2.51 (m, 1H), 2.41 (s, 3H), 1.98 (tt,  $J$  = 11.2, 3.2 Hz, 1H), 1.86–1.64 (m, 4H), 1.33–1.05 (m, 6H); <sup>13</sup>C NMR (100 MHz, CDCl<sub>3</sub>):  $\delta$  (ppm) 168.8, 156.5, 154.6, 152.8, 145.3, 140.3, 135.4, 130.1, 129.3, 129.1, 127.6, 127.5, 127.2, 124.9, 123.5, 119.9, 119.3, 116.6, 111.4, 45.9, 43.8, 36.3, 32.6, 31.5, 26.5, 26.1, 25.8, 21.7; ESI-HRMS: calcd. for C<sub>32</sub>H<sub>31</sub>NO<sub>4</sub>S + H<sup>+</sup> 526.2052, found 526.2045.

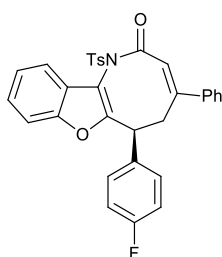

**Synthesis of 3n: General procedure A:** To a solution of cyclobutenone **1a** (21.6 mg, 0.15 mmol, 1.5 equiv), catalyst **C6** (7.8 mg, 10 mol%) and 4 Å MS (100.0 mg) in toluene (1.0 mL) was added *N*-((*Z*)-2-(4-fluorobenzylidene)benzofuran-3(2*H*)-ylidene)-4-methylbenzenesulfonamide **2b** (39.3 mg, 0.1 mmol, 1.0 equiv). The mixture was stirred at 50 °C for 48 h. After completion, it was purified by flash chromatography on silica gel (EtOAc/petroleum ether = 1/17) to give

product **3n**: 53.5 mg, 99% yield, white solid; mp 83–85 °C;  $[\alpha]_D^{25}$  = +203.2 ( $c$  = 0.25 in CHCl<sub>3</sub>); 98% ee, determined by HPLC analysis [Chiralpak IC, *n*-hexane/*i*-PrOH = 60/40, 1.0 mL/min,  $\lambda$  = 254 nm,  $t$  (major) = 7.42 min  $t$  (minor) = 9.89 min]; <sup>1</sup>H NMR (400 MHz, CDCl<sub>3</sub>):  $\delta$  (ppm) 8.06 (d,  $J$  = 8.5 Hz, 2H), 7.56–7.51 (m, 1H), 7.50–7.44 (m, 2H), 7.38–7.33 (m, 6H), 7.33–7.29 (m, 3H), 7.29–7.26 (m, 1H), 7.14–7.08 (m, 2H), 6.09 (s, 1H), 4.32 (dd,  $J$  = 14.0, 4.4 Hz, 1H), 3.49 (t,  $J$  = 14.0 Hz, 1H), 3.14–3.05 (m, 1H), 2.45 (s, 3H); <sup>13</sup>C NMR (100 MHz, CDCl<sub>3</sub>):  $\delta$  (ppm) 167.8, 162.2 (d,  $J_{FC}$  = 245.1 Hz), 154.4, 152.8, 148.7, 145.7, 138.0, 135.8 (d,  $J_{FC}$  = 3.2 Hz), 135.3, 130.1, 129.6, 129.4, 129.3 ( $J_{FC}$  = 8.0 Hz), 129.0, 127.0, 126.3, 125.2, 123.6, 121.1, 119.8, 116.5, 116.0 ( $J_{FC}$  = 21.4 Hz), 111.5, 43.1, 36.5, 21.7; <sup>19</sup>F NMR (376 MHz, CDCl<sub>3</sub>):  $\delta$  (ppm) –114.6; ESI-HRMS: calcd. for C<sub>32</sub>H<sub>24</sub>FNO<sub>4</sub>S + H<sup>+</sup> 538.1488, found 538.1483.

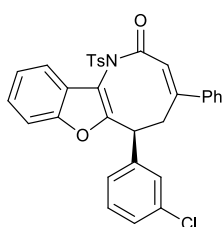

**Synthesis of 3o: General procedure A:** To a solution of cyclobutenone **1a** (21.6 mg, 0.15 mmol, 1.5 equiv), catalyst **C6** (7.8 mg, 10 mol%) and 4 Å MS (100.0 mg) in toluene (1.0 mL) was added *N*-((*Z*)-2-(3-chlorobenzylidene)benzofuran-3(2*H*)-ylidene)-4-methylbenzenesulfonamide **2c** (41.0 mg, 0.1 mmol, 1.0 equiv).

The mixture was stirred at 50 °C for 48 h. After completion, it was purified by flash chromatography on silica gel (EtOAc/petroleum ether = 1/17) to give product **3o**: 55.1 mg, 99% yield, white solid; mp 90–92 °C;  $[\alpha]_D^{25}$  = +201.6 ( $c$  = 0.25 in CHCl<sub>3</sub>); 97% ee, determined by HPLC analysis [Chiralpak IC, *n*-hexane/*i*-PrOH = 60/40, 1.0 mL/min,  $\lambda$  = 254 nm,  $t$  (major) = 7.60 min,  $t$  (minor) = 9.85 min]; <sup>1</sup>H NMR (400 MHz, CDCl<sub>3</sub>):  $\delta$  (ppm) 8.08 (d,  $J$  = 8.4 Hz, 2H), 7.61–7.57 (m, 1H), 7.49 (t,  $J$  = 1.8 Hz, 1H), 7.43–7.28 (m, 13H), 6.10 (s, 1H), 4.30 (dd,  $J$  = 14.0, 4.4 Hz, 1H), 3.43



(t,  $J = 14.0$  Hz, 1H), 3.13–3.03 (m, 1H), 2.45 (s, 3H);  $^{13}\text{C}$  NMR (100 MHz,  $\text{CDCl}_3$ ):  $\delta$  (ppm) 167.7, 153.7, 152.9, 148.4, 145.7, 142.0, 137.9, 135.2, 134.9, 130.5, 130.2, 129.6, 129.4, 129.0, 127.9, 127.7, 127.0, 126.2, 125.8, 125.3, 123.6, 121.2, 120.0, 116.7, 111.5, 43.4, 36.2, 21.7; ESI-HRMS: calcd. for  $\text{C}_{32}\text{H}_{24}\text{ClNO}_4\text{S} + \text{H}^+$  554.1193, found 554.1186.

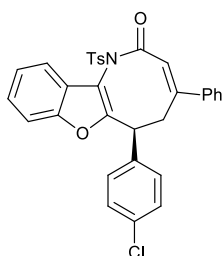

**Synthesis of 3p: General procedure A:** To a solution of cyclobutenone **1a** (21.6 mg, 0.15 mmol, 1.5 equiv), catalyst **C6** (7.8 mg, 10 mol%) and 4 Å MS (100.0 mg) in toluene (1.0 mL) was added *N*-((*Z*)-2-(4-chlorobenzylidene)benzofuran-3(2*H*)-ylidene)-4-methylbenzenesulfonamide **2d** (41.0 mg, 0.1 mmol, 1.0 equiv). The mixture was stirred at 50 °C for 48 h. After completion, it was purified by flash chromatography on silica gel (EtOAc/petroleum ether = 1/17) to give

product **3p**: 55.2 mg, 98% yield, white solid; mp 95–96 °C;  $[\alpha]_{\text{D}}^{25} = +234.4$  ( $c = 0.25$  in  $\text{CHCl}_3$ ); 99% ee, determined by HPLC analysis [Chiralpak IC, *n*-hexane/*i*-PrOH = 60/40, 1.0 mL/min,  $\lambda = 254$  nm,  $t$  (major) = 7.41 min,  $t$  (minor) = 10.30 min];  $^1\text{H}$  NMR (400 MHz,  $\text{CDCl}_3$ ):  $\delta$  (ppm) 8.05 (d,  $J = 8.4$  Hz, 2H), 7.56–7.52 (m, 1H), 7.44 (d,  $J = 8.6$  Hz, 2H), 7.40 (d,  $J = 2.4$  Hz, 1H), 7.39–7.32 (m, 8H), 7.31 (d,  $J = 1.4$  Hz, 2H), 7.29–7.26 (m, 1H), 6.09 (s, 1H), 4.31 (dd,  $J = 14.0, 4.4$  Hz, 1H), 3.48 (t,  $J = 14.0$  Hz, 1H), 3.08 (ddd,  $J = 14.0, 4.4, 1.0$  Hz, 1H), 2.45 (s, 3H);  $^{13}\text{C}$  NMR (100 MHz,  $\text{CDCl}_3$ ):  $\delta$  (ppm) 167.8, 154.1, 152.9, 148.6, 145.7, 138.5, 138.0, 135.2, 133.5, 130.1, 129.6, 129.4, 129.3, 129.0, 128.9, 127.0, 126.3, 125.2, 123.6, 121.1, 119.9, 116.6, 111.5, 43.2, 36.2, 21.7; ESI-HRMS: calcd. for  $\text{C}_{32}\text{H}_{24}\text{ClNO}_4\text{S} + \text{Na}^+$  576.1012, found 576.1002.

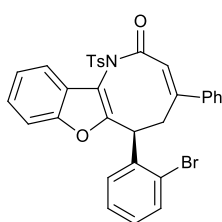

**Synthesis of 3q: General procedure A:** To a solution of cyclobutenone **1a** (21.6 mg, 0.15 mmol, 1.5 equiv), catalyst **C6** (7.8 mg, 10 mol%) and 4 Å MS (100.0 mg) in toluene (1.0 mL) was added *N*-((*Z*)-2-(2-bromobenzylidene)benzofuran-3(2*H*)-ylidene)-4-methylbenzenesulfonamide **2e** (45.4 mg, 0.1 mmol, 1.0 equiv).

The mixture was stirred at 50 °C for 48 h. After completion, it was purified by flash chromatography on silica gel (EtOAc/petroleum ether = 1/17) to give product **3q**: 57.3 mg, 96% yield, white solid; mp 157–158 °C;  $[\alpha]_{\text{D}}^{25} = +152$  ( $c = 0.25$  in  $\text{CHCl}_3$ ); 95% ee, determined by HPLC analysis [Chiralpak IA, *n*-hexane/*i*-PrOH = 80/20, 1.0 mL/min,  $\lambda = 254$  nm,  $t$  (major) = 13.99 min,  $t$  (minor) = 15.48 min];  $^1\text{H}$  NMR (400 MHz,  $\text{CDCl}_3$ ):  $\delta$  (ppm) 8.11 (d,  $J = 8.4$  Hz, 2H), 7.78 (dd,  $J = 7.8, 1.6$  Hz, 1H), 7.72–7.67 (m, 1H), 7.64 (dd,  $J = 8.0, 1.2$  Hz, 1H), 7.46–7.42 (m, 2H), 7.39–7.29 (m, 9H), 7.23–7.17 (m, 1H), 6.07 (s, 1H), 4.70 (dd,  $J = 13.2, 4.8$  Hz, 1H), 3.34–3.28 (m, 1H), 3.22 (t,  $J = 13.2$  Hz, 1H), 2.43 (s, 3H);  $^{13}\text{C}$  NMR (100 MHz,  $\text{CDCl}_3$ ):  $\delta$  (ppm) 167.7, 153.8, 152.8, 149.6, 145.7, 139.2, 137.7, 135.2, 133.5, 130.2, 129.6, 129.5, 129.4, 129.3, 128.7, 128.5, 127.0, 126.9, 125.3, 123.7, 123.6, 121.2, 120.0, 117.7, 111.5, 43.7, 34.2, 21.7; ESI-HRMS: calcd. for  $\text{C}_{32}\text{H}_{24}\text{BrNO}_4\text{S} + \text{Na}^+$

620.0507 ( $^{79}\text{Br}$ ), 622.0487 ( $^{81}\text{Br}$ ), found 620.0507, 622.0486.

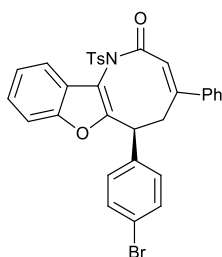

**Synthesis of 3r: General procedure A:** To a solution of cyclobutenone **1a** (21.6 mg, 0.15 mmol, 1.5 equiv), catalyst **C6** (7.8 mg, 10 mol%) and 4 Å MS (100.0 mg) in toluene (1.0 mL) was added *N*-((*Z*)-2-(4-bromobenzylidene)benzofuran-3(2*H*)-ylidene)-4-methylbenzenesulfonamide **2f** (45.4 mg, 0.1 mmol, 1.0 equiv). The mixture was stirred at 50 °C for 38 h. After completion, it was purified by flash chromatography on silica gel (EtOAc/petroleum ether = 1/17) to give

product **3r**: 57.6 mg, 99% yield, white solid; mp 151–152 °C;  $[\alpha]_{\text{D}}^{25} = +215.2$  ( $c = 0.25$  in  $\text{CHCl}_3$ ); 96% ee, determined by HPLC analysis [Chiralpak IC, *n*-hexane/*i*-PrOH = 60/40, 1.0 mL/min,  $\lambda = 254$  nm,  $t$  (major) = 7.62 min,  $t$  (minor) = 10.76 min];  $^1\text{H}$  NMR (400 MHz,  $\text{CDCl}_3$ ):  $\delta$  (ppm) 8.05 (d,  $J = 8.4$  Hz, 2H), 7.58–7.52 (m, 3H), 7.40–7.33 (m, 8H), 7.32 (d,  $J = 1.2$  Hz, 2H), 7.28 (dd,  $J = 6.8$ , 1.8 Hz, 2H), 6.09 (s, 1H), 4.29 (dd,  $J = 14.0$ , 4.4 Hz, 1H), 3.48 (t,  $J = 14.0$  Hz, 1H), 3.08 (dd,  $J = 14.0$ , 4.4 Hz, 1H), 2.46 (s, 3H);  $^{13}\text{C}$  NMR (100 MHz,  $\text{CDCl}_3$ ):  $\delta$  (ppm) 167.8, 154.0, 152.9, 148.6, 145.7, 139.1, 138.0, 135.2, 132.3, 130.1, 129.7, 129.4, 129.3, 129.0, 127.0, 126.3, 125.3, 123.6, 121.7, 121.2, 119.9, 116.7, 111.5, 43.3, 36.2, 21.7; ESI-HRMS: calcd. for  $\text{C}_{32}\text{H}_{24}\text{BrNO}_4\text{S} + \text{Na}^+$  620.0507 ( $^{79}\text{Br}$ ), 622.0487 ( $^{81}\text{Br}$ ), found 620.0513, 622.0481.

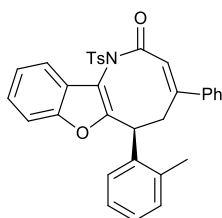

**Synthesis of 3s: General procedure A:** To a solution of cyclobutenone **1a** (21.6 mg, 0.15 mmol, 1.5 equiv), catalyst **C6** (7.8 mg, 10 mol%) and 4 Å MS (100.0 mg) in toluene (1.0 mL) was added 4-methyl-*N*-((*Z*)-2-(2-methylbenzylidene)benzofuran-3(2*H*)-ylidene)benzenesulfonamide **2g** (38.9 mg, 0.1 mmol, 1.0 equiv). The mixture was stirred at 50 °C for 36 h. After completion, it was purified

by flash chromatography on silica gel (EtOAc/petroleum ether = 1/17) to give product **3s**: 53.2 mg, 99% yield, white solid; mp 103–104 °C;  $[\alpha]_{\text{D}}^{25} = +258.4$  ( $c = 0.25$  in  $\text{CHCl}_3$ ); 97% ee, determined by HPLC analysis [Chiralpak IC, *n*-hexane/*i*-PrOH = 60/40, 1.0 mL/min,  $\lambda = 254$  nm,  $t$  (major) = 7.75 min,  $t$  (minor) = 10.52 min];  $^1\text{H}$  NMR (400 MHz,  $\text{CDCl}_3$ ):  $\delta$  (ppm) 8.15 (d,  $J = 8.4$  Hz, 2H), 7.73–7.68 (m, 1H), 7.66 (d,  $J = 7.2$  Hz, 1H), 7.38–7.34 (m, 3H), 7.34–7.26 (m, 8H), 7.26–7.24 (m, 1H), 7.21 (dd,  $J = 7.4$ , 1.4 Hz, 1H), 6.04 (s, 1H), 4.40 (dd,  $J = 16$ , 4.0 Hz, 1H), 3.34 (t,  $J = 13.6$  Hz, 1H), 3.03–2.96 (m, 1H), 2.43 (s, 3H), 2.32 (s, 3H);  $^{13}\text{C}$  NMR (100 MHz,  $\text{CDCl}_3$ ):  $\delta$  (ppm) 167.7, 154.8, 152.7, 149.8, 145.6, 138.4, 138.3, 135.2, 135.0, 131.1, 130.3, 129.6, 129.4, 128.9, 127.64, 127.62, 127.2, 127.0, 126.5, 125.1, 123.5, 121.2, 120.0, 117.1, 111.4, 40.5, 35.1, 21.7, 19.0; ESI-HRMS: calcd. for  $\text{C}_{33}\text{H}_{27}\text{NO}_4\text{S} + \text{Na}^+$  556.1558, found 556.1543.



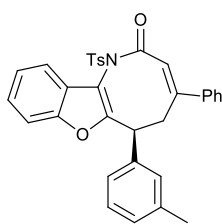

**Synthesis of 3t: General procedure A:** To a solution of cyclobutenone **1a** (21.6 mg, 0.15 mmol, 1.5 equiv), catalyst **C6** (7.8 mg, 10 mol%) and 4 Å MS (100.0 mg) in toluene (1.0 mL) was added 4-methyl-*N*-((*Z*)-2-(3-methylbenzylidene)benzofuran-3(2*H*)-ylidene)benzenesulfonamide **2h** (38.9 mg, 0.1 mmol, 1.0 equiv). The mixture was stirred at 50 °C for 48 h. After completion, it was purified

by flash chromatography on silica gel (EtOAc/petroleum ether = 1/17) to give product **3t**: 53.5 mg, 99% yield, white solid; mp 93–95 °C;  $[\alpha]_D^{25} = +264.8$  ( $c = 0.25$  in  $\text{CHCl}_3$ ); 99% ee, determined by HPLC analysis [Chiralpak IC, *n*-hexane/*i*-PrOH = 60/40, 1.0 mL/min,  $\lambda = 254$  nm,  $t$  (major) = 7.38 min,  $t$  (minor) = 9.83 min];  $^1\text{H}$  NMR (400 MHz,  $\text{CDCl}_3$ ):  $\delta$  (ppm) 8.07 (d,  $J = 8.4$  Hz, 2H), 7.67–7.62 (m, 1H), 7.38–7.34 (m, 6H), 7.34–7.31 (m, 2H), 7.31–7.27 (m, 5H), 7.17–7.13 (m, 1H), 6.09 (s, 1H), 4.31 (dd,  $J = 14.0, 4.4$  Hz, 1H), 3.41 (t,  $J = 14.0$  Hz, 1H), 3.09 (ddd,  $J = 14.0, 4.4, 1.2$  Hz, 1H), 2.43 (s, 3H), 2.39 (s, 3H);  $^{13}\text{C}$  NMR (100 MHz,  $\text{CDCl}_3$ ):  $\delta$  (ppm) 167.9, 154.6, 152.8, 148.7, 145.5, 140.0, 138.9, 138.1, 135.3, 130.2, 129.5, 129.3, 129.1, 128.9, 128.4, 128.2, 127.2, 126.3, 125.0, 124.5, 123.6, 120.9, 119.9, 116.4, 111.5, 43.8, 36.6, 21.7, 21.4; ESI-HRMS: calcd. for  $\text{C}_{33}\text{H}_{27}\text{NO}_4\text{S} + \text{Na}^+$  556.1558, found 556.1549.

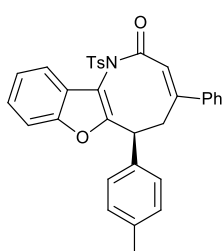

**Synthesis of 3u: General procedure A:** To a solution of cyclobutenone **1a** (21.6 mg, 0.15 mmol, 1.5 equiv), catalyst **C6** (7.8 mg, 10 mol%) and 4 Å MS (100.0 mg) in toluene (1.0 mL) was added 4-methyl-*N*-((*Z*)-2-(4-methylbenzylidene)benzofuran-3(2*H*)-ylidene)benzenesulfonamide **2i** (38.9 mg, 0.1 mmol, 1.0 equiv). The mixture was stirred at 50 °C for 54 h (after 24 h, another 0.5 equiv cyclobutenone **1a** was added). After completion, it was purified by flash

chromatography on silica gel (EtOAc/petroleum ether = 1/17) to give product **3u**: 52.2 mg, 98% yield, white solid; mp 88–89 °C;  $[\alpha]_D^{25} = +254.4$  ( $c = 0.25$  in  $\text{CHCl}_3$ ); 98% ee, determined by HPLC analysis [Chiralpak IC, *n*-hexane/*i*-PrOH = 60/40, 1.0 mL/min,  $\lambda = 254$  nm,  $t$  (major) = 7.53 min,  $t$  (minor) = 12.84 min];  $^1\text{H}$  NMR (400 MHz,  $\text{CDCl}_3$ ):  $\delta$  (ppm) 8.06 (d,  $J = 8.4$  Hz, 2H), 7.63–7.59 (m, 1H), 7.38 (d,  $J = 2.0$  Hz, 1H), 7.37–7.34 (m, 6H), 7.34–7.33 (m, 1H), 7.31–7.29 (m, 2H), 7.29–7.27 (m, 2H), 7.23 (d,  $J = 8.0$  Hz, 2H), 6.09 (s, 1H), 4.31 (dd,  $J = 14.0, 4.4$  Hz, 1H), 3.43 (t,  $J = 14.0$  Hz, 1H), 3.09 (ddd,  $J = 14.0, 4.4, 1.2$  Hz, 1H), 2.44 (s, 3H), 2.37 (s, 3H);  $^{13}\text{C}$  NMR (100 MHz,  $\text{CDCl}_3$ ):  $\delta$  (ppm) 168.0, 154.8, 152.8, 148.7, 145.5, 138.1, 137.4, 137.1, 135.3, 130.2, 129.8, 129.5, 129.4, 129.0, 127.4, 127.2, 126.3, 125.0, 123.5, 120.9, 119.9, 116.3, 111.5, 43.4, 36.5, 21.7, 21.1; ESI-HRMS: calcd. for  $\text{C}_{33}\text{H}_{27}\text{NO}_4\text{S} + \text{Na}^+$  556.1558, found 556.1548.

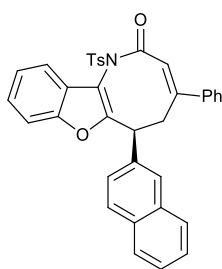

**Synthesis of 3v: General procedure A:** To a solution of cyclobutenone **1a** (21.6 mg, 0.15 mmol, 1.5 equiv), catalyst **C6** (7.8 mg, 10 mol%) and 4 Å MS (100.0 mg) in toluene (1.0 mL) was added 4-methyl-*N*-((*Z*)-2-(naphthalen-2-ylmethylene)benzofuran-3(2*H*)-ylidene)benzenesulfonamide **2j** (42.5 mg, 0.1 mmol, 1.0 equiv). The mixture was stirred at 50 °C for 36 h. After completion, it was purified by flash chromatography on silica gel (EtOAc/petroleum ether = 1/17) to give product **3v**: 55.7 mg, 98% yield, white solid; mp 105–107 °C;  $[\alpha]_{\text{D}}^{25} = +294.4$  ( $c = 0.25$  in  $\text{CHCl}_3$ ); 98% ee, determined by HPLC analysis [Chiralpak IC, *n*-hexane/*i*-PrOH = 60/40, 1.0 mL/min,  $\lambda = 254$  nm,  $t$  (major) = 8.38 min,  $t$  (minor) = 11.03 min];  $^1\text{H}$  NMR (400 MHz,  $\text{CDCl}_3$ ):  $\delta$  (ppm) 8.06 (d,  $J = 8.4$  Hz, 2H), 7.96 (d,  $J = 1.8$  Hz, 1H), 7.91 (d,  $J = 8.4$  Hz, 1H), 7.88–7.83 (m, 2H), 7.71–7.67 (m, 1H), 7.61 (dd,  $J = 8.4, 2.0$  Hz, 1H), 7.50–7.46 (m, 2H), 7.40–7.34 (m, 6H), 7.33–7.29 (m, 2H), 7.18 (d,  $J = 8.2$  Hz, 2H), 6.12 (s, 1H), 4.52 (dd,  $J = 14.0, 4.4$  Hz, 1H), 3.47 (t,  $J = 14.0$  Hz, 1H), 3.25–3.16 (m, 1H), 2.37 (s, 3H);  $^{13}\text{C}$  NMR (100 MHz,  $\text{CDCl}_3$ ):  $\delta$  (ppm) 167.9, 154.5, 152.9, 148.6, 145.5, 138.1, 137.6, 135.2, 133.6, 132.7, 130.1, 129.6, 129.3, 129.0, 128.9, 128.0, 127.7, 127.3, 126.5, 126.29, 126.27, 126.2, 125.5, 125.1, 123.6, 121.1, 119.9, 116.7, 111.5, 43.9, 36.7, 21.6; ESI-HRMS: calcd. for  $\text{C}_{36}\text{H}_{27}\text{NO}_4\text{S} + \text{H}^+$  570.1739, found 570.1730.

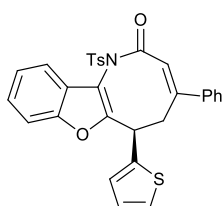

**Synthesis of 3w: General procedure A:** To a solution of cyclobutenone **1a** (21.6 mg, 0.15 mmol, 1.5 equiv), catalyst **C6** (7.8 mg, 10 mol%) and 4 Å MS (100.0 mg) in toluene (1.0 mL) was added 4-methyl-*N*-((*Z*)-2-(thiophen-2-ylmethylene)benzofuran-3(2*H*)-ylidene)benzenesulfonamide **2k** (38.1 mg, 0.1 mmol, 1.0 equiv). The mixture was stirred at 50 °C for 48 h. After completion, it was purified

by flash chromatography on silica gel (EtOAc/petroleum ether = 1/17) to give product **3w**: 50.2 mg, 96% yield, white solid; mp 96–97 °C;  $[\alpha]_{\text{D}}^{25} = +152$  ( $c = 0.25$  in  $\text{CHCl}_3$ ); 98% ee, determined by HPLC analysis [Chiralpak IC, *n*-hexane/*i*-PrOH = 60/40, 1.0 mL/min,  $\lambda = 254$  nm,  $t$  (major) = 10.02 min,  $t$  (minor) = 19.49 min];  $^1\text{H}$  NMR (400 MHz,  $\text{CDCl}_3$ ):  $\delta$  (ppm) 7.95 (d,  $J = 8.4$  Hz, 2H), 7.68–7.64 (m, 1H), 7.42–7.39 (m, 1H), 7.35–7.29 (m, 8H), 7.27 (d,  $J = 8.2$  Hz, 2H), 7.07 (dd,  $J = 3.6, 1.2$  Hz, 1H), 7.03 (dd,  $J = 5.2, 3.6$  Hz, 1H), 6.10 (s, 1H), 4.62–4.54 (m, 1H), 3.38 (t,  $J = 13.6$  Hz, 1H), 3.23 (ddd,  $J = 13.6, 5.0, 1.2$  Hz, 1H), 2.43 (s, 3H);  $^{13}\text{C}$  NMR (100 MHz,  $\text{CDCl}_3$ ):  $\delta$  (ppm) 167.7, 153.7, 152.8, 147.3, 145.5, 142.7, 137.7, 135.1, 130.1, 129.6, 129.3, 129.0, 127.2, 127.18, 126.2, 125.5, 125.2, 124.9, 123.7, 121.2, 120.0, 115.7, 111.5, 38.7, 36.3, 21.7; ESI-HRMS: calcd. for  $\text{C}_{30}\text{H}_{23}\text{NO}_4\text{S}_2 + \text{H}^+$  526.1147, found 526.1143.

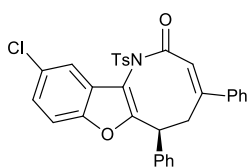

**Synthesis of 3x: General procedure A:** To a solution of cyclobutenone **1a** (21.6 mg, 0.15 mmol, 1.5 equiv), catalyst **C6** (7.8 mg, 10 mol%) and 4 Å MS (100.0 mg) in toluene (1.0 mL) was added *N*-((*Z*)-2-benzylidene-5-chloro

benzofuran-3(*2H*)-ylidene)-4-methylbenzenesulfonamide **2l** (41.0 mg, 0.1 mmol, 1.0 equiv). The mixture was stirred at 50 °C for 24 h. After completion, it was purified by flash chromatography on silica gel (EtOAc/petroleum ether = 1/17) to give product **3x**: 55.1 mg, 92% yield, white solid; mp 163–164 °C;  $[\alpha]_D^{25} = +233.6$  ( $c = 0.25$  in  $\text{CHCl}_3$ ); 98% ee, determined by HPLC analysis [Chiralpak IC, *n*-hexane/*i*-PrOH = 60/40, 1.0 mL/min,  $\lambda = 254$  nm,  $t$  (major) = 8.01 min,  $t$  (minor) = 8.72 min];  $^1\text{H}$  NMR (400 MHz,  $\text{CDCl}_3$ ):  $\delta$  (ppm) 8.06 (d,  $J = 8.2$  Hz, 2H), 7.51–7.46 (m, 2H), 7.46–7.42 (m, 2H), 7.39–7.33 (m, 6H), 7.34–7.29 (m, 3H), 7.27–7.23 (m, 2H), 6.11 (s, 1H), 4.31 (dd,  $J = 14.0, 4.4$  Hz, 1H), 3.50 (t,  $J = 14.0$  Hz, 1H), 3.13 (dd,  $J = 14.0, 4.4$  Hz, 1H), 2.45 (s, 3H);  $^{13}\text{C}$  NMR (100 MHz,  $\text{CDCl}_3$ ):  $\delta$  (ppm) 167.6, 156.3, 151.2, 149.0, 145.8, 139.7, 138.0, 135.1, 130.1, 129.7, 129.5, 129.4, 129.2, 129.0, 128.3, 127.8, 127.5, 126.3, 125.4, 120.9, 119.6, 116.1, 112.6, 43.9, 36.3, 21.7; ESI-HRMS: calcd. for  $\text{C}_{32}\text{H}_{24}\text{ClNO}_4\text{S} + \text{Na}^+$  576.1012 ( $^{35}\text{Cl}$ ), 577.1046 ( $^{37}\text{Cl}$ ), found 576.1006, 577.1044.

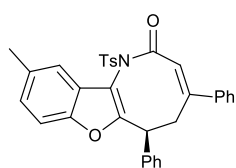

**Synthesis of 3y: General procedure A:** To a solution of cyclobutenone **1a** (21.6 mg, 0.15 mmol, 1.5 equiv), catalyst **C6** (7.8 mg, 10 mol%) and 4 Å MS (100.0 mg) in toluene (1.0 mL) was added *N*-((*Z*)-2-benzylidene-5-methylbenzofuran-3(*2H*)-ylidene)-4-methylbenzenesulfonamide **2m** (38.9 mg, 0.1 mmol, 1.0

equiv). The mixture was stirred at 50 °C for 58 h. After completion, it was purified by flash chromatography on silica gel (EtOAc/petroleum ether = 1/17) to give product **3y**: 52.6 mg, 99% yield, white solid; mp 191–193 °C;  $[\alpha]_D^{25} = +244$  ( $c = 0.25$  in  $\text{CHCl}_3$ ); 98% ee, determined by HPLC analysis [Chiralpak IC, *n*-hexane/*i*-PrOH = 60/40, 1.0 mL/min,  $\lambda = 254$  nm,  $t$  (major) = 7.64 min,  $t$  (minor) = 8.59 min];  $^1\text{H}$  NMR (400 MHz,  $\text{CDCl}_3$ ):  $\delta$  (ppm) 8.05 (d,  $J = 8.4$  Hz, 2H), 7.51–7.46 (m, 2H), 7.45–7.39 (m, 2H), 7.38–7.33 (m, 6H), 7.31 (dd,  $J = 2.0, 1.2$  Hz, 1H), 7.28 (d,  $J = 8.2$  Hz, 2H), 7.24–7.20 (m, 1H), 7.10 (dd,  $J = 8.4, 1.6$  Hz, 1H), 6.09 (s, 1H), 4.32 (dd,  $J = 14.0, 4.4$  Hz, 1H), 3.42 (t,  $J = 14.0$  Hz, 1H), 3.10 (ddd,  $J = 14.0, 4.4, 1.2$  Hz, 1H), 2.43 (s, 3H), 2.41 (s, 3H);  $^{13}\text{C}$  NMR (100 MHz,  $\text{CDCl}_3$ ):  $\delta$  (ppm) 167.9, 154.5, 151.3, 148.8, 145.5, 140.2, 138.1, 135.3, 133.2, 130.2, 129.5, 129.3, 129.1, 129.0, 127.6, 127.5, 127.2, 126.3, 126.28, 121.0, 119.6, 116.2, 111.0, 43.8, 36.4, 21.7, 21.3; ESI-HRMS: calcd. for  $\text{C}_{33}\text{H}_{27}\text{NO}_4\text{S} + \text{Na}^+$  556.1558, found 556.1553.

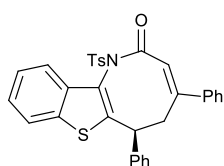

**Synthesis of 3z: General procedure A:** To a solution of cyclobutenone **1a** (21.6 mg, 0.15 mmol, 1.5 equiv), catalyst **C6** (7.8 mg, 10 mol%) and 4 Å MS (100.0 mg) in toluene (1.0 mL) was added *N*-((*Z*)-2-benzylidenebenzo[*b*]thiophen-

3(2*H*)-ylidene)-4-methylbenzenesulfonamide **2n** (39.1 mg, 0.1 mmol, 1.0 equiv). The mixture was stirred at 50 °C for 24 h. After completion, it was purified by flash chromatography on silica gel (EtOAc/petroleum ether = 1/17) and recrystallization to give product **3z**: 40.2 mg, 76% yield, white solid; mp 101–102 °C;  $[\alpha]_D^{25} = +369.6$  ( $c = 0.25$  in CHCl<sub>3</sub>); 99% ee, determined by HPLC analysis [Chiralpak IC, *n*-hexane/*i*-PrOH = 60/40, 1.0 mL/min,  $\lambda = 254$  nm,  $t$  (major) = 8.60 min,  $t$  (minor) = 16.27 min]; <sup>1</sup>H NMR (400 MHz, CDCl<sub>3</sub>):  $\delta$  (ppm) 8.01 (d,  $J = 7.6$  Hz, 1H), 7.78 (d,  $J = 8.4$  Hz, 2H), 7.73 (dd,  $J = 7.6, 1.2$  Hz, 1H), 7.53–7.47 (m, 2H), 7.45 (d,  $J = 1.2$  Hz, 1H), 7.45–7.41 (m, 2H), 7.41–7.31 (m, 4H), 7.30–7.26 (m, 2H), 7.13 (d,  $J = 8.0$  Hz, 2H), 6.01 (s, 1H), 4.50 (dd,  $J = 13.2, 5.6$  Hz, 1H), 3.37 (t,  $J = 13.2$  Hz, 1H), 3.21 (ddd,  $J = 13.2, 5.6, 1.2$  Hz, 1H), 2.39 (s, 3H); <sup>13</sup>C NMR (100 MHz, CDCl<sub>3</sub>):  $\delta$  (ppm) 168.3, 148.9, 145.3, 142.3, 141.7, 138.9, 138.3, 135.8, 135.0, 130.5, 129.4, 129.1, 128.9, 128.8, 128.5, 127.7, 127.4, 126.3, 125.4, 125.2, 122.4, 122.2, 121.1, 44.6, 37.4, 21.6; ESI-HRMS: calcd. for C<sub>32</sub>H<sub>25</sub>NO<sub>3</sub>S<sub>2</sub> + Na<sup>+</sup> 558.1174, found 558.1169.

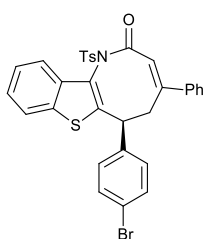

**Synthesis of 3aa: General procedure A:** To a solution of cyclobutenone **1a** (21.6 mg, 0.15 mmol, 1.5 equiv), catalyst **C6** (7.8 mg, 10 mol%) and 4 Å MS (100.0 mg) in toluene (1.0 mL) was added *N*-((*Z*)-2-(4-bromobenzylidene)benzo[*b*]thiophen-3(2*H*)-ylidene)-4-methylbenzenesulfonamide **2o** (47.0 mg, 0.1 mmol, 1.0 equiv).

The mixture was stirred at 50 °C for 10 h. After completion, it was purified by flash chromatography on silica gel (EtOAc/petroleum ether = 1/17) and recrystallization to give product **3aa**: 44.6 mg, 73% yield, white solid; mp 185–186 °C;  $[\alpha]_D^{25} = +252$  ( $c = 0.25$  in CHCl<sub>3</sub>); 99% ee, determined by HPLC analysis [Chiralpak IC, *n*-hexane/*i*-PrOH = 60/40, 1.0 mL/min,  $\lambda = 254$  nm,  $t$  (major) = 8.11 min,  $t$  (minor) = 12.14 min]; <sup>1</sup>H NMR (400 MHz, CDCl<sub>3</sub>):  $\delta$  (ppm) 7.92–7.88 (m, 1H), 7.83 (d,  $J = 8.4$  Hz, 2H), 7.73 (dd,  $J = 6.8, 2.0$  Hz, 1H), 7.57–7.53 (m, 2H), 7.45–7.37 (m, 5H), 7.36–7.30 (m, 3H), 7.27 (d,  $J = 2.0$  Hz, 1H), 7.20 (d,  $J = 8.4$  Hz, 2H), 6.01 (s, 1H), 4.42 (dd,  $J = 13.2, 5.2$  Hz, 1H), 3.46 (t,  $J = 13.2$  Hz, 1H), 3.16 (dd,  $J = 13.2, 5.2$  Hz, 1H), 2.42 (s, 3H); <sup>13</sup>C NMR (100 MHz, CDCl<sub>3</sub>):  $\delta$  (ppm) 168.2, 148.9, 145.6, 141.7, 140.7, 138.7, 138.2, 135.8, 135.0, 132.0, 130.4, 129.49, 129.46, 129.2, 128.9, 126.4, 126.3, 125.5, 125.3, 122.3, 122.2, 121.4, 121.2, 44.1, 37.2, 21.7; ESI-HRMS: calcd. for C<sub>32</sub>H<sub>24</sub>BrNO<sub>3</sub>S<sub>2</sub> + Na<sup>+</sup> 636.0279 (<sup>79</sup>Br), 638.0258 (<sup>81</sup>Br), found 636.0280, 638.0254.

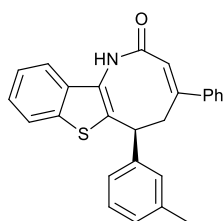

**Synthesis of 5ab: General procedure B:** To a solution of cyclobutenone **1a** (21.6 mg, 0.15 mmol, 1.5 equiv), catalyst **C6** (7.8 mg, 10 mol%) and 4 Å MS (100.0 mg) in toluene (1.0 mL) was added 4-methyl-*N*-((*Z*)-2-(3-methylbenzylidene)benzo[*b*]thiophen-3(2*H*)-ylidene)benzenesulfonamide **2p** (40.5 mg, 0.1 mmol, 1.0 equiv). The mixture was stirred at 50 °C for 35 h. The crude annulation

product was purified by flash chromatography on silica gel (EtOAc/petroleum ether = 1/17). Then

the crude product was added to a solution of CuCl (39.6 mg, 4.0 equiv) in EtOH (1.0 mL), and NaBH<sub>4</sub> (15.2 mg, 4.0 equiv) was added in one portion. The mixture was stirred at 50 °C for 5 h. After completion, the mixture was concentrated and it was purified by flash chromatography on silica gel (EtOAc/petroleum ether = 1/8) to give product **5ab**: 24.9 mg, 63% yield, white solid; mp 104–106 °C;  $[\alpha]_D^{25} = -32$  ( $c = 0.25$  in CHCl<sub>3</sub>); 95% ee, determined by HPLC analysis [Chiralpak AD, *n*-hexane/*i*-PrOH = 80/20, 1.0 mL/min,  $\lambda = 254$  nm,  $t$  (minor) = 7.37 min,  $t$  (major) = 11.71 min]; <sup>1</sup>H NMR (400 MHz, CDCl<sub>3</sub>):  $\delta$  (ppm) 7.86 (s, 1H), 7.76 (d,  $J = 8.0$  Hz, 1H), 7.64 (d,  $J = 8.0$  Hz, 1H), 7.48–7.42 (m, 3H), 7.42–7.32 (m, 4H), 7.20–7.16 (m, 1H), 7.09–7.02 (m, 3H), 6.24 (s, 1H), 4.35 (dd,  $J = 14.0, 4.8$  Hz, 1H), 3.84 (t,  $J = 14.0$  Hz, 1H), 3.15 (dd,  $J = 14.0, 4.8$  Hz, 1H), 2.31 (s, 3H); <sup>13</sup>C NMR (100 MHz, CDCl<sub>3</sub>):  $\delta$  (ppm) 171.5, 147.3, 143.6, 138.7, 138.2, 137.2, 136.4, 129.0, 128.9, 128.8, 128.2, 127.7, 126.9, 126.3, 125.7, 125.1, 124.7, 124.2, 122.4, 120.4, 120.2, 45.2, 39.3, 21.5; ESI-HRMS: calcd. for C<sub>26</sub>H<sub>21</sub>NOS + Na<sup>+</sup> 418.1242, found 418.1243.

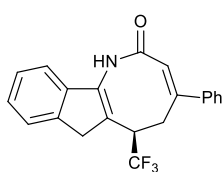

**Synthesis of 5ac: General procedure B:** To a solution of cyclobutenone **1a** (21.6 mg, 0.15 mmol, 1.5 equiv), catalyst **C6** (7.8 mg, 10 mol%) and 4 Å MS (100.0 mg) in toluene (1.0 mL) was added 4-methyl-*N*-((*E*)-2-(2,2,2-trifluoroethylidene)-2,3-dihydro-1*H*-inden-1-ylidene)benzenesulfonamide **2q** (26.5 mg, 0.1 mmol, 1.0 equiv). The mixture was stirred at 50 °C for 27 h. The crude annulation product was purified by flash chromatography on silica gel (EtOAc/petroleum ether = 1/17). Then the crude product was added to a solution of CuCl (39.6 mg, 4.0 equiv) in EtOH (1.0 mL), and NaBH<sub>4</sub> (15.2 mg, 4.0 equiv) was added in one portion. The mixture was stirred at 50 °C for 5 h. After completion, the mixture was concentrated and it was purified by flash chromatography on silica gel (EtOAc/petroleum ether = 1/6) to give product **5ac**: 26.6 mg, 75% yield, colorless semisolid;  $[\alpha]_D^{25} = -147.2$  ( $c = 0.25$  in CHCl<sub>3</sub>); 99% ee, determined by HPLC analysis [Chiralpak AD, *n*-hexane/*i*-PrOH = 90/10, 1.0 mL/min,  $\lambda = 254$  nm,  $t$  (minor) = 23.40 min,  $t$  (major) = 34.03 min]; <sup>1</sup>H NMR (400 MHz, CDCl<sub>3</sub>):  $\delta$  (ppm) 7.56 (s, 1H), 7.44–7.33 (m, 8H), 7.30 (dd,  $J = 7.2, 1.4$  Hz, 1H), 6.25 (s, 1H), 3.72 (d,  $J = 23.0$  Hz, 1H), 3.61 (t,  $J = 13.4$  Hz, 1H), 3.48–3.35 (m, 1H), 3.25 (d,  $J = 23.0$  Hz, 1H), 3.17 (dd,  $J = 13.4, 4.4$  Hz, 1H); <sup>13</sup>C NMR (100 MHz, CDCl<sub>3</sub>):  $\delta$  (ppm) 170.5, 144.8, 142.3, 140.8, 137.8, 137.3, 129.4, 129.0, 127.9, 126.9, 126.5, 126.08, 126.1 (q,  $J_{FC} = 280.2$  Hz), 123.8, 121.2, 118.1, 43.1 (q,  $J_{FC} = 27.3$  Hz), 40.8, 29.7; <sup>19</sup>F NMR (376 MHz, CDCl<sub>3</sub>)  $\delta$  (ppm) –60.4; ESI-HRMS: calcd. for C<sub>21</sub>H<sub>16</sub>F<sub>3</sub>NO + Na<sup>+</sup> 378.1082, found 378.1076.

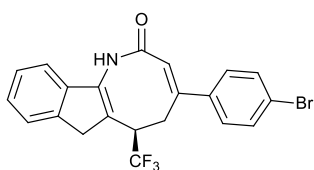

**Synthesis of 5ad: General procedure B:** To a solution of cyclobutenone **1e** (33.5 mg, 0.15 mmol, 1.5 equiv), catalyst **C6** (7.8 mg, 10 mol%) and 4 Å MS (100.0 mg) in toluene (1.0 mL) was added 4-methyl-*N*-((*E*)-2-

(2,2,2-trifluoroethylidene)-2,3-dihydro-1*H*-inden-1-ylidene)benzenesulfonamide **2q** (26.5 mg, 0.1 mmol, 1.0 equiv). The mixture was stirred at 50 °C for 18 h. The crude annulation product was purified by flash chromatography on silica gel (EtOAc/petroleum ether = 1/17). Then the crude product was added to a solution of CuCl (39.6 mg, 4.0 equiv) in EtOH (1.0 mL), and NaBH<sub>4</sub> (15.2 mg, 4.0 equiv) was added in one portion. The mixture was stirred at 50 °C for 5 h. After completion, the mixture was concentrated and it was purified by flash chromatography on silica gel (EtOAc/petroleum ether = 1/6) to give product **5ad**: 19.0 mg, 44% yield, colorless semisolid; [ $\alpha$ ]<sub>D</sub><sup>25</sup> = −98.3 (*c* = 0.6 in CHCl<sub>3</sub>); 95% ee, determined by HPLC analysis [Chiralpak AD *n*-hexane/*i*-PrOH = 90/10, 1.0 mL/min,  $\lambda$  = 254 nm, *t* (minor) = 20.98 min, *t* (major) = 33.11 min]; <sup>1</sup>H NMR (400 MHz, CDCl<sub>3</sub>):  $\delta$  (ppm) 7.46–7.41 (m, 2H), 7.37–7.27 (m, 5H), 7.26–7.22 (m, 1H), 7.20 (d, *J* = 8.8 Hz, 2H), 6.17 (d, *J* = 4.4 Hz, 1H), 3.65 (d, *J* = 23.0 Hz, 1H), 3.59–3.47 (m, 1H), 3.38–3.27 (m, 1H), 3.18 (dd, *J* = 23.0, 3.0 Hz, 1H), 3.07 (ddd, *J* = 24.8, 13.6, 4.4 Hz, 1H); <sup>13</sup>C NMR (100 MHz, CDCl<sub>3</sub>):  $\delta$  (ppm) 170.0, 144.8, 143.6, 142.1, 140.8, 137.3, 132.2, 129.0, 127.7, 126.9, 126.7, 126.1, 125.1 (q, *J*<sub>FC</sub> = 287.1 Hz), 123.9, 121.7, 118.0, 43.0 (q, *J*<sub>FC</sub> = 21.6 Hz), 40.8, 29.6; <sup>19</sup>F NMR (376 MHz, CDCl<sub>3</sub>)  $\delta$  (ppm) −69.1; ESI-HRMS: calcd. for C<sub>21</sub>H<sub>15</sub>BrF<sub>3</sub>NO + Na<sup>+</sup> 456.0187 (<sup>79</sup>Br), 458.0166 (<sup>81</sup>Br), found 456.0167, 458.0163.

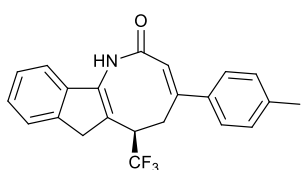

**Synthesis of 5ae: General procedure B:** To a solution of cyclobutenone **1g** (23.7 mg, 0.15 mmol, 1.5 equiv), catalyst **C6** (7.8 mg, 10 mol%) and 4-**Å** MS (100.0 mg) in toluene (1.0 mL) was added 4-methyl-*N*-((*E*)-2-(2,2,2-trifluoroethylidene)-2,3-dihydro-1*H*-inden-1-ylidene)benzenesulfonamide **2q** (40.5 mg, 0.1 mmol, 1.0 equiv). The mixture was stirred at 50 °C for 30 h. The crude annulation product was purified by flash chromatography on silica gel (EtOAc/petroleum ether = 1/17). Then the crude product was added to a solution of CuCl (39.6 mg, 4.0 equiv) in EtOH (1.0 mL), and NaBH<sub>4</sub> (15.2 mg, 4.0 equiv) was added in one portion. The mixture was stirred at 50 °C for 5 h. After completion, the mixture was concentrated and it was purified by flash chromatography on silica gel (EtOAc/petroleum ether = 1/6) to give product **5ae**: 22.8 mg, 62% yield, colorless semisolid; [ $\alpha$ ]<sub>D</sub><sup>25</sup> = −119.4 (*c* = 1.0 in CHCl<sub>3</sub>); 99% ee, determined by HPLC analysis [Chiralpak AD, *n*-hexane/*i*-PrOH = 90/10, 1.0 mL/min,  $\lambda$  = 254 nm, *t* (minor) = 24.17 min, *t* (major) = 29.02 min]; <sup>1</sup>H NMR (400 MHz, CDCl<sub>3</sub>):  $\delta$  (ppm) 7.66 (s, 1H), 7.45–7.36 (m, 3H), 7.33–7.27 (m, 3H), 7.18 (d, *J* = 8.0 Hz, 2H), 6.24 (s, 1H), 3.71 (d, *J* = 23.0 Hz, 1H), 3.60 (t, *J* = 13.4 Hz, 1H), 3.46–3.33 (m, 1H), 3.23 (d, *J* = 23.0 Hz, 1H), 3.15 (dd, *J* = 13.4, 4.4 Hz, 1H), 2.36 (s, 3H); <sup>13</sup>C NMR (100 MHz, CDCl<sub>3</sub>):  $\delta$  (ppm) 170.7, 144.7, 142.3, 140.8, 139.5, 137.3, 134.7, 129.6, 127.8, 126.8, 126.4, 126.1 (q, *J*<sub>FC</sub> = 280.1 Hz), 126.0, 123.7, 120.3, 118.1, 43.0 (q, *J*<sub>FC</sub> = 27.3 Hz), 40.8, 29.4, 21.1; <sup>19</sup>F NMR (376 MHz, CDCl<sub>3</sub>)  $\delta$  (ppm) −69.1; ESI-HRMS: calcd. for C<sub>22</sub>H<sub>18</sub>F<sub>3</sub>NO + Na<sup>+</sup> 392.1238, found 392.1237.

#### 4. Asymmetric reaction on a 1.0 mmol scale

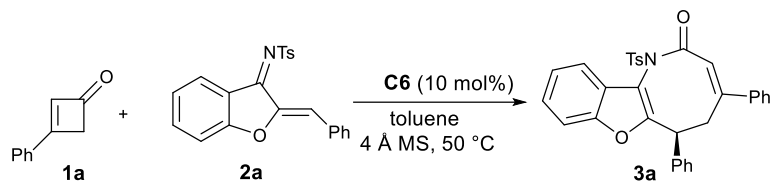

To a solution of cyclobutenone **1a** (216 mg, 1.5 mmol, 1.5 equiv), catalyst **C6** (78 mg, 10 mol%) and 4 Å MS (1000 mg) in toluene (10.0 mL) was added 1-azadiene **2a** (375 mg, 1 mmol, 1.0 equiv). The mixture was stirred at 50 °C for 60 h. After completion, the pure product **3a** (519.8 mg) was obtained by flash chromatography on silica gel (EtOAc/petroleum ether = 1/17) in 99% yield and 98% ee.

#### 5. Transformations of product 3a

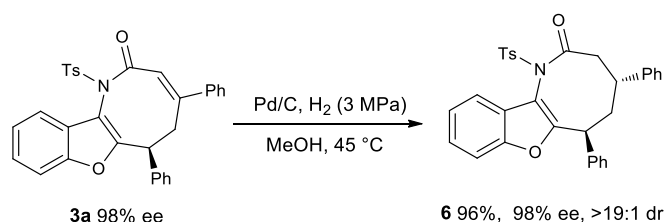

To a solution of **3a** (51.9 mg, 0.1 mmol, 1.0 equiv) in MeOH (1.0 mL) was added Pd/C (15 wt%). The mixture was stirred at 45 °C for 24 h under H<sub>2</sub> (3 MPa), then MeOH was evaporated under reduced pressure and the resulting was purified by flash chromatography on silica gel (EtOAc/petroleum ether = 1/20) to give product **6**: 50.1 mg, 96% yield; white solid, mp 201–202 °C;  $[\alpha]_D^{25} = +234.4$  ( $c = 0.25$  in CHCl<sub>3</sub>); >19:1 dr; 98% ee, determined by HPLC analysis [Chiralpak AD, *n*-hexane/*i*-PrOH = 60/40, 1.0 mL min<sup>-1</sup>,  $\lambda = 254$  nm,  $t$  (major) = 10.20 min,  $t$  (minor) = 19.69 min]; <sup>1</sup>H NMR (400 MHz, CDCl<sub>3</sub>):  $\delta$  (ppm) 8.11 (d,  $J = 8.0$  Hz, 2H), 7.80–7.74 (m, 1H), 7.45–7.40 (m, 1H), 7.39–7.33 (m, 3H), 7.33–7.26 (m, 6H), 7.23–7.19 (m, 1H), 7.13–7.01 (m, 4H), 4.16 (dd,  $J = 13.6, 3.6$  Hz, 1H), 3.52–3.42 (m, 1H), 3.19 (t,  $J = 12.4$  Hz, 1H), 2.59–2.47 (m, 2H), 2.44 (s, 3H), 2.00 (dt,  $J = 15.2, 3.6$  Hz, 1H); <sup>13</sup>C NMR (100 MHz, CDCl<sub>3</sub>):  $\delta$  (ppm) 172.4, 154.6, 153.3, 145.5, 141.6, 141.3, 135.2, 130.1, 129.3, 128.84, 128.81, 127.4, 127.2, 127.1, 126.6, 126.2, 125.3, 123.7, 120.1, 117.9, 111.6, 41.4, 40.9, 37.8, 37.0, 21.7; ESI-HRMS: calcd. for C<sub>32</sub>H<sub>27</sub>NO<sub>4</sub>S + Na<sup>+</sup> 418.1242, found 418.1243.

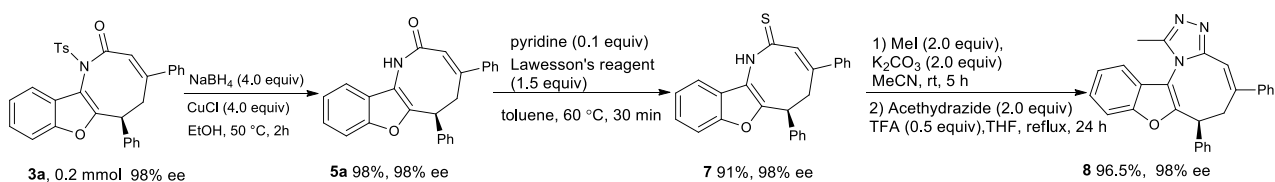



To a solution of **3a** (103.8 mg, 0.2 mmol, 1.0 equiv) in EtOH (2.0 mL) was added CuCl (79.0 mg, 0.8 mmol, 4.0 equiv), and NaBH<sub>4</sub> (30.0 mg, 0.8 mmol, 4.0 equiv) was added in one portion. The mixture was stirred at 50 °C for 2 h. After completion (determined by TLC analysis), it was quenched with water (3.0 mL). Then EtOH was evaporated under reduced pressure and the resulting aqueous phase was extracted with DCM (3 × 5 mL). The combined organic layers were dried (Na<sub>2</sub>SO<sub>4</sub>) and evaporated. The crude was purified by flash chromatography on silica gel (EtOAc/petroleum ether = 1/6) to give product **5a**: 72.3 mg, white solid, 98% yield, mp 101–103 °C; [ $\alpha$ ]<sub>D</sub><sup>25</sup> = –53.3 (*c* = 0.3 in CHCl<sub>3</sub>); 98% ee, determined by HPLC analysis [Chiralpak IB, *n*-hexane/*i*-PrOH = 95/5, 1.0 mL min<sup>–1</sup>,  $\lambda$  = 254 nm, *t* (major) = 16.03 min, *t* (minor) = 18.65 min]; <sup>1</sup>H NMR (400 MHz, CDCl<sub>3</sub>):  $\delta$  (ppm) 8.34 (s, 1H), 7.67–7.60 (m, 1H), 7.54–7.47 (m, 2H), 7.43–7.37 (m, 3H), 7.31–7.34 (m, 1H), 7.28–7.31 (m, 1H), 7.25–7.28 (m, 3H), 7.20–7.25 (m, 2H), 7.24–7.22 (m, 1H), 6.31 (s, 1H), 4.32 (dd, *J* = 13.6, 4.0 Hz, 1H), 3.70 (t, *J* = 13.6 Hz, 1H), 3.22–3.02 (m, 1H); <sup>13</sup>C NMR (100 MHz, CDCl<sub>3</sub>):  $\delta$  (ppm) 171.3, 152.5, 150.4, 147.3, 141.6, 138.4, 129.2, 129.0, 128.9, 127.4, 127.3, 126.3, 126.0, 124.9, 123.0, 120.2, 118.0, 116.5, 111.3, 43.7, 37.2; ESI-HRMS: calcd. for C<sub>25</sub>H<sub>19</sub>NO<sub>2</sub> + Na<sup>+</sup> 388.1313, found 388.1304. (*Both excess NaBH<sub>4</sub> and CuCl are important to the effective N-detosylation process*)

**5a** (72.3 mg, 0.198 mmol, 1.0 equiv) was dissolved in toluene (2.0 mL), then the Lawesson's reagent (120 mg, 0.297 mmol, 1.5 equiv) and pyridine (2.0  $\mu$ L, 0.198 mmol, 0.1 equiv) were added. Then the mixture was stirred at 60 °C for 30 min. After completion (determined by TLC analysis), it was purified by flash chromatography on silica gel (EtOAc/petroleum ether = 1/20) to give product **7**: 68.4 mg, yellow solid, 91% yield, mp 105–107 °C; [ $\alpha$ ]<sub>D</sub><sup>25</sup> = –150.36 (*c* = 0.2 in CHCl<sub>3</sub>); 98% ee, determined by HPLC analysis [Chiralpak ID, *n*-hexane/*i*-PrOH = 90/10, 1.0 mL min<sup>–1</sup>,  $\lambda$  = 254 nm, *t* (minor) = 10.11 min, *t* (major) = 11.01 min]; <sup>1</sup>H NMR (400 MHz, CDCl<sub>3</sub>):  $\delta$  (ppm) 9.38 (s, 1H), 7.61 (dd, *J* = 6.8, 2.8 Hz, 1H), 7.52 (dd, *J* = 6.8, 2.8 Hz, 2H), 7.45–7.36 (m, 3H), 7.34–7.27 (m, 6H), 7.24–7.19 (m, 2H), 6.73 (s, 1H), 4.28 (dd, *J* = 13.6, 4.2 Hz, 1H), 3.47 (t, *J* = 13.6 Hz, 1H), 3.11 (dd, *J* = 13.6, 4.2 Hz, 1H); <sup>13</sup>C NMR (100 MHz, CDCl<sub>3</sub>):  $\delta$  (ppm) 200.7, 152.3, 152.2, 142.8, 141.2, 138.0, 129.3, 129.0, 128.9, 127.6, 127.2, 126.9, 126.4, 125.4, 124.9, 123.4, 118.4, 117.9, 111.5, 43.3, 36.0; ESI-HRMS: calcd. for C<sub>25</sub>H<sub>19</sub>NOS + Na<sup>+</sup> 404.1085, found 404.1091.

**7** (68.4 mg, 0.179 mmol, 1.0 equiv) was dissolved in MeCN (2.0 mL), then MeI (30.0  $\mu$ L, 0.359 mmol, 2.0 equiv) and K<sub>2</sub>CO<sub>3</sub> (37.2 mg, 0.269 mmol, 1.5 equiv) were added. The mixture was stirred at room temperature until completion (determined by TLC analysis), and it was purified by flash chromatography on silica gel (EtOAc/petroleum ether = 1/50) to give methylation product. The product was dissolved in THF (2.0 mL), then acethydrazide (26.6 mg, 0.359 mmol, 2.0 equiv) and TFA (6.7  $\mu$ L, 0.089 mmol, 0.5 equiv) were added. The reaction was stirred at 70 °C for 24 h. Then the mixture was purified by flash chromatography on silica gel (from EtOAc/petroleum ether = 1/3 to DCM/MeOH = 80/1) to give product **8**: 69.9 mg, white solid, 96% yield, mp 104–106 °C; [ $\alpha$ ]<sub>D</sub><sup>25</sup> = +490.4 (*c* = 0.25 in CHCl<sub>3</sub>); 98% ee, determined by HPLC analysis [Chiralpak AD, *n*-hexane/*i*-



PrOH = 80/20, 1.0 mL min<sup>-1</sup>,  $\lambda$  = 254 nm, t (minor) = 13.66 min, t (major) = 17.68 min]; <sup>1</sup>H NMR (400 MHz, CDCl<sub>3</sub>):  $\delta$  (ppm) 7.56–7.50 (m, 2H), 7.46–7.39 (m, 3H), 7.37–7.30 (m, 4H), 7.30–7.27 (m, 2H), 7.23 (dd,  $J$  = 7.2, 1.6 Hz, 1H), 7.20–7.16 (m, 2H), 6.90 (s, 1H), 4.42 (dd,  $J$  = 13.2, 5.4 Hz, 1H), 3.16–3.00 (m, 2H), 2.64 (s, 3H); <sup>13</sup>C NMR (100 MHz, CDCl<sub>3</sub>):  $\delta$  (ppm) 153.9, 153.0, 151.8, 149.4, 140.7, 138.0, 129.4, 129.2, 129.0, 127.8, 127.0, 126.3, 125.6, 124.2, 123.8, 118.5, 114.1, 113.4, 112.1, 44.0, 36.8, 12.0; ESI-HRMS: calcd. for C<sub>27</sub>H<sub>21</sub>N<sub>3</sub>O + Na<sup>+</sup> 404.1763, found 404.1758.

## 6. More screening studies on diverse cyclobutenones and 4C-type substrates

### [4+2] annulations

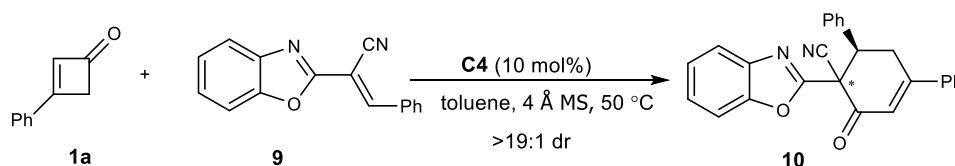

To a solution of cyclobutenone **1a** (21.6 mg, 0.15 mmol, 1.5 equiv), catalyst **C4** (8.6 mg, 10 mol%) and 4 Å MS (100.0 mg) in toluene (1.0 mL) was added 1-azadiene-type substrate **9** (24.6 mg, 0.1 mmol, 1.0 equiv). The mixture was stirred at 50 °C for 48 h. After completion, it was purified by flash chromatography on silica gel (EtOAc/petroleum ether = 1/10) to give the [4 + 2] product **10**: 36.6 mg, 94% yield, white solid; mp 163–164 °C;  $[\alpha]_D^{25}$  = –82.4 ( $c$  = 0.25 in CHCl<sub>3</sub>); >19:1 dr; 80% ee, determined by HPLC analysis [Chiralpak IA, *n*-hexane/*i*-PrOH = 90/10, 1.0 mL/min,  $\lambda$  = 254 nm, t (minor) = 20.93 min, t (major) = 23.33 min]; <sup>1</sup>H NMR (400 MHz, CDCl<sub>3</sub>):  $\delta$  (ppm) 7.69–7.65 (m, 1H), 7.62 (dd,  $J$  = 8.0, 1.6 Hz, 2H), 7.50–7.46 (m, 3H), 7.46–7.42 (m, 3H), 7.32–7.26 (m, 2H), 7.24–7.18 (m, 3H), 6.72 (d,  $J$  = 2.2 Hz, 1H), 4.37 (dd,  $J$  = 11.6, 4.0 Hz, 1H), 3.70 (ddd,  $J$  = 18.8, 11.6, 2.4 Hz, 1H), 3.31 (dd,  $J$  = 18.8, 4.0 Hz, 1H); <sup>13</sup>C NMR (100 MHz, CDCl<sub>3</sub>):  $\delta$  (ppm) 185.1, 161.5, 158.2, 151.0, 140.5, 136.8, 136.7, 131.5, 129.2, 129.0, 128.8, 127.9, 126.5, 125.7, 124.8, 121.5, 120.7, 113.6, 110.8, 56.2, 47.8, 33.0; ESI-HRMS: calcd. for C<sub>26</sub>H<sub>18</sub>N<sub>2</sub>O<sub>2</sub> + Na<sup>+</sup> 413.1266, found 413.1265.

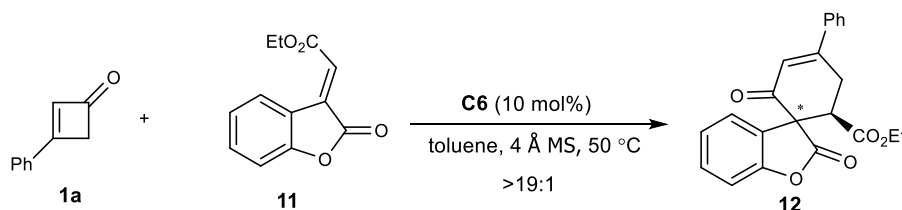

To a solution of cyclobutenone **1a** (21.6 mg, 0.15 mmol, 1.5 equiv), catalyst **C6** (7.8 mg, 10 mol%) and 4 Å MS (100.0 mg) in toluene (1.0 mL) was added 1-oxadiene-type substrate **11** (21.8 mg, 0.1 mmol, 1.0 equiv). The mixture was stirred at 50 °C for 48 h. After completion, it was purified by flash chromatography on silica gel (EtOAc/petroleum ether = 1/6) to give the [4 + 2] product **12**: 35.9 mg, 99% yield, faint yellow solid; mp 147–148 °C;  $[\alpha]_D^{25}$  = +239.4 ( $c$  = 0.25 in CHCl<sub>3</sub>); >19:1 dr; 73% ee, determined by HPLC analysis [Chiralpak AD, *n*-hexane/*i*-PrOH = 80/20, 1.0 mL/min,  $\lambda$  =

254 nm, t (major) = 21.68 min, t (minor) = 23.91 min];  $^1\text{H}$  NMR (400 MHz,  $\text{CDCl}_3$ ):  $\delta$  (ppm) 7.79–7.67 (m, 2H), 7.57–7.46 (m, 3H), 7.38–7.32 (m, 1H), 7.23–7.18 (m, 1H), 7.15–7.02 (m, 2H), 6.62 (d,  $J = 2.4$ , 1H), 4.12–3.92 (m, 3H), 3.56–3.47 (m, 1H), 3.40 (ddd,  $J = 19.4$ , 11.6, 2.4 Hz, 1H), 1.05 (t,  $J = 7.2$  Hz, 3H);  $^{13}\text{C}$  NMR (100 MHz,  $\text{CDCl}_3$ ):  $\delta$  (ppm) 190.9, 174.4, 169.4, 158.1, 154.2, 136.9, 131.4, 130.2, 129.2, 126.4, 125.2, 124.2, 123.3, 122.8, 111.6, 61.9, 59.9, 44.8, 27.0, 13.5; ESI-HRMS: calcd. for  $\text{C}_{22}\text{H}_{18}\text{O}_5 + \text{H}^+$  363.1232, found 363.1237.

To further expand the substrate scope for [4 + 4] annulation reaction protocol, more 4C synthons were tested with cyclobutenone **1a** under the catalysis of DABCO. As exemplified below, the following electron-deficient dienes showed low reactivity.

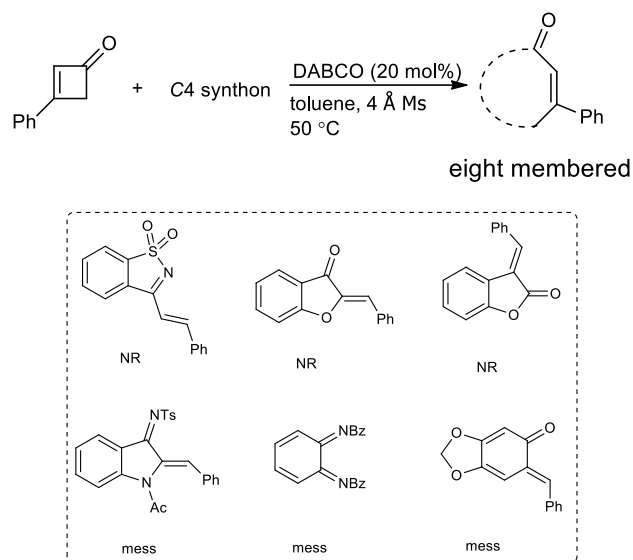

In addition, we explored other types cyclobutenones for the [4 + 4] annulation reactions with 1-azadiene **2a** under the catalysis of DABCO. Unfortunately, the cyclobutenones bearing a substituent at 2- or 4-position were inert probably due to the steric effect. Besides, the benzocyclobutenones were not reactive either.

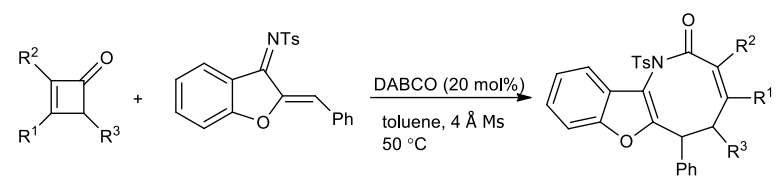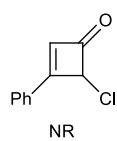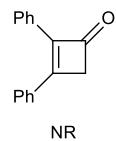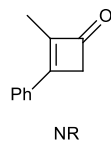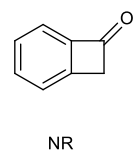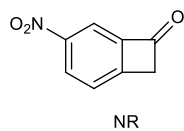

## 7. Crystal data and structural refinement for enantiopure **3y**

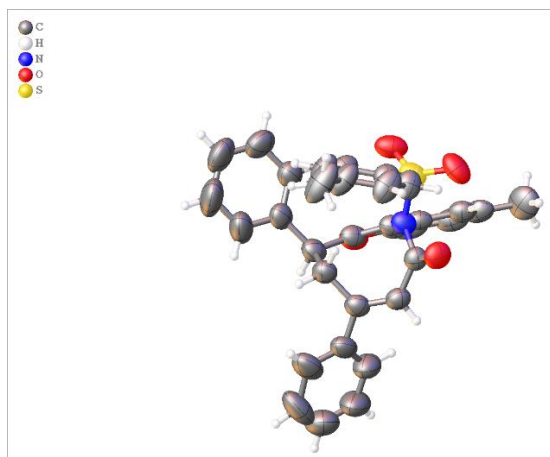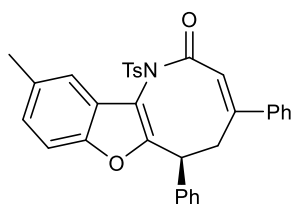

**3y** (CCDC 1997811)

|                                             |                                                               |
|---------------------------------------------|---------------------------------------------------------------|
| Identification code                         | <b>3y</b>                                                     |
| Empirical formula                           | C <sub>33</sub> H <sub>27</sub> NO <sub>4</sub> S             |
| Formula weight                              | 533.61                                                        |
| Temperature/K                               | 293.3(7)                                                      |
| Crystal system                              | trigonal                                                      |
| Space group                                 | R3                                                            |
| a/Å                                         | 27.6807(5)                                                    |
| b/Å                                         | 27.6807(5)                                                    |
| c/Å                                         | 9.6164(3)                                                     |
| α/°                                         | 90                                                            |
| β/°                                         | 90                                                            |
| γ/°                                         | 120                                                           |
| Volume/Å <sup>3</sup>                       | 6381.2(3)                                                     |
| Z                                           | 9                                                             |
| ρ <sub>calc</sub> /cm <sup>3</sup>          | 1.250                                                         |
| μ/mm <sup>-1</sup>                          | 1.318                                                         |
| F(000)                                      | 2520.0                                                        |
| Crystal size/mm <sup>3</sup>                | 0.6 × 0.35 × 0.35                                             |
| Radiation                                   | CuKα (λ = 1.54184)                                            |
| 2θ range for data collection/°              | 9.91 to 143.366                                               |
| Index ranges                                | -34 ≤ h ≤ 27, -32 ≤ k ≤ 33, -11 ≤ l ≤ 9                       |
| Reflections collected                       | 13695                                                         |
| Independent reflections                     | 4776 [R <sub>int</sub> = 0.0309, R <sub>sigma</sub> = 0.0272] |
| Data/restraints/parameters                  | 4776/1/354                                                    |
| Goodness-of-fit on F <sup>2</sup>           | 1.056                                                         |
| Final R indexes [I ≥ 2σ (I)]                | R <sub>1</sub> = 0.0507, wR <sub>2</sub> = 0.1402             |
| Final R indexes [all data]                  | R <sub>1</sub> = 0.0527, wR <sub>2</sub> = 0.1448             |
| Largest diff. peak/hole / e Å <sup>-3</sup> | 0.40/-0.22                                                    |
| Flack parameter                             | -0.009(14)                                                    |

## 8. NMR spectra and HPLC chromatograms

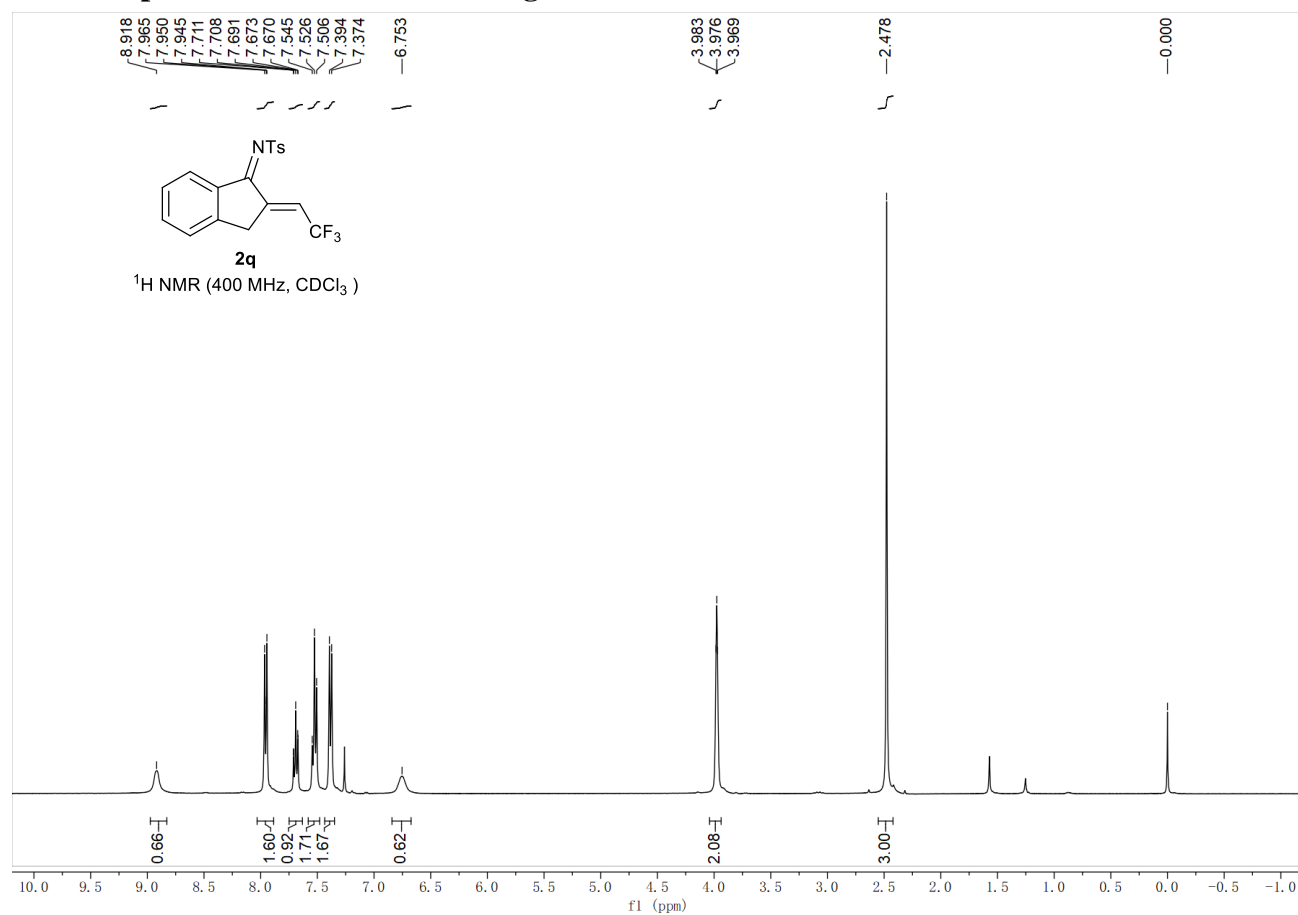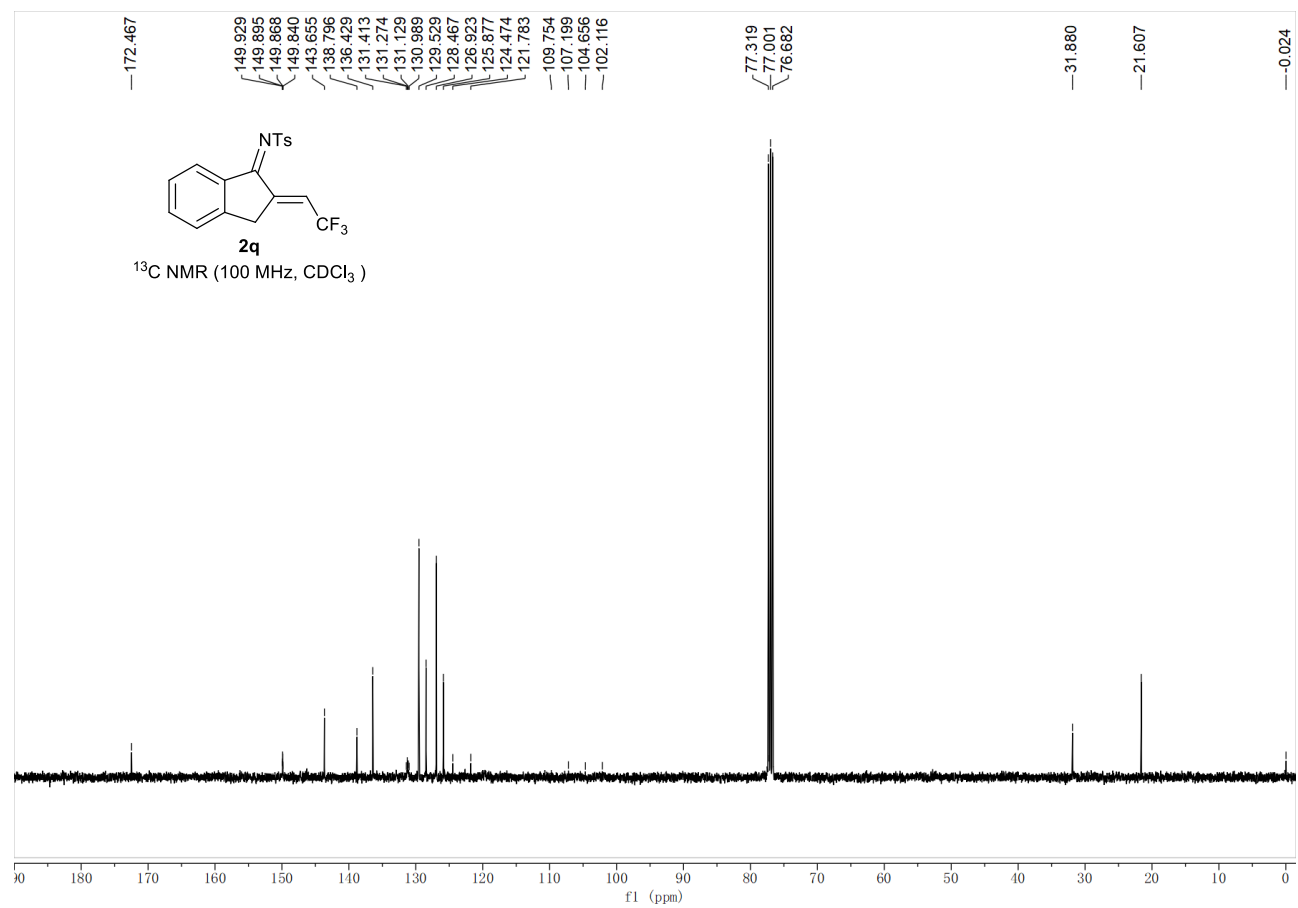

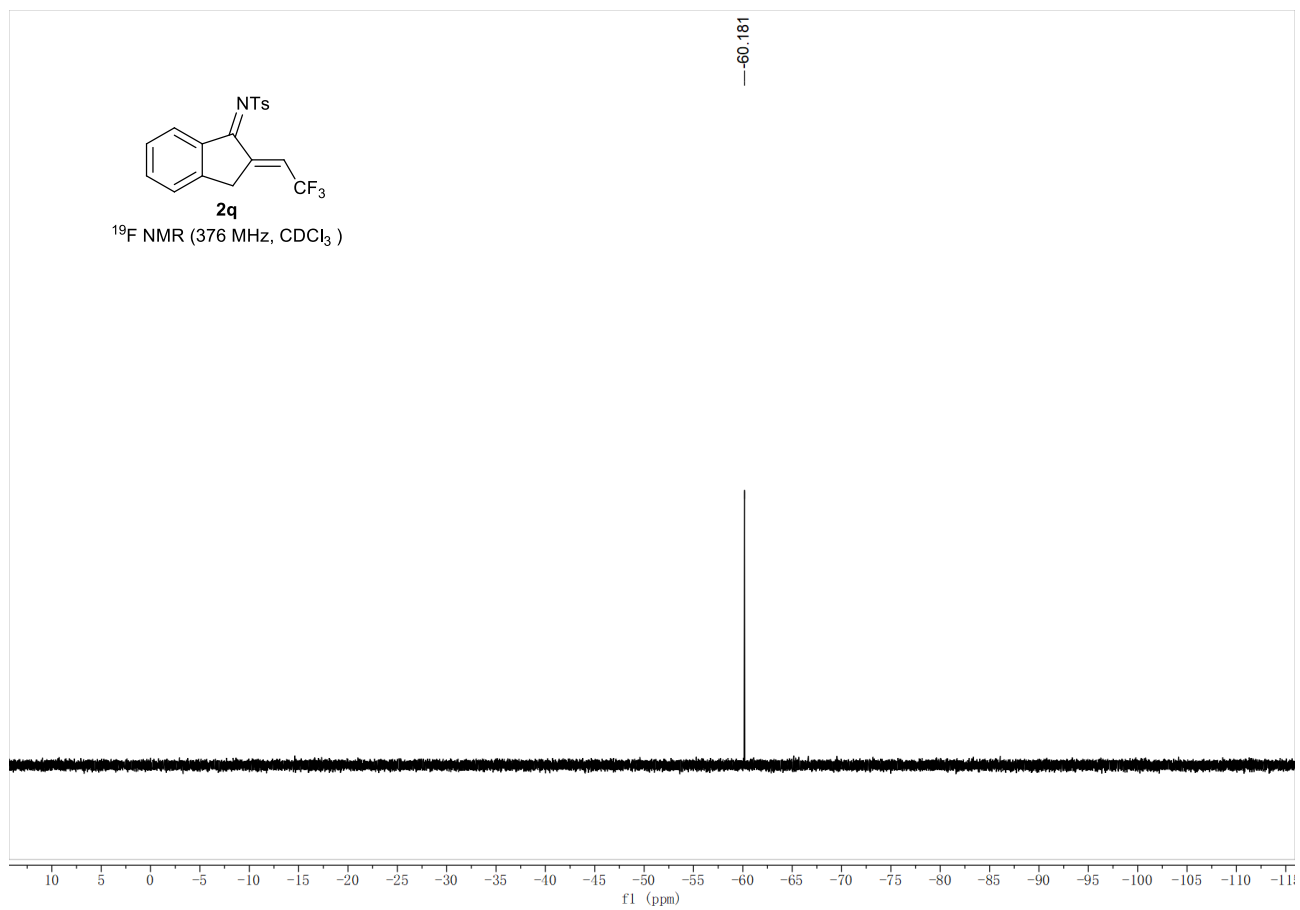

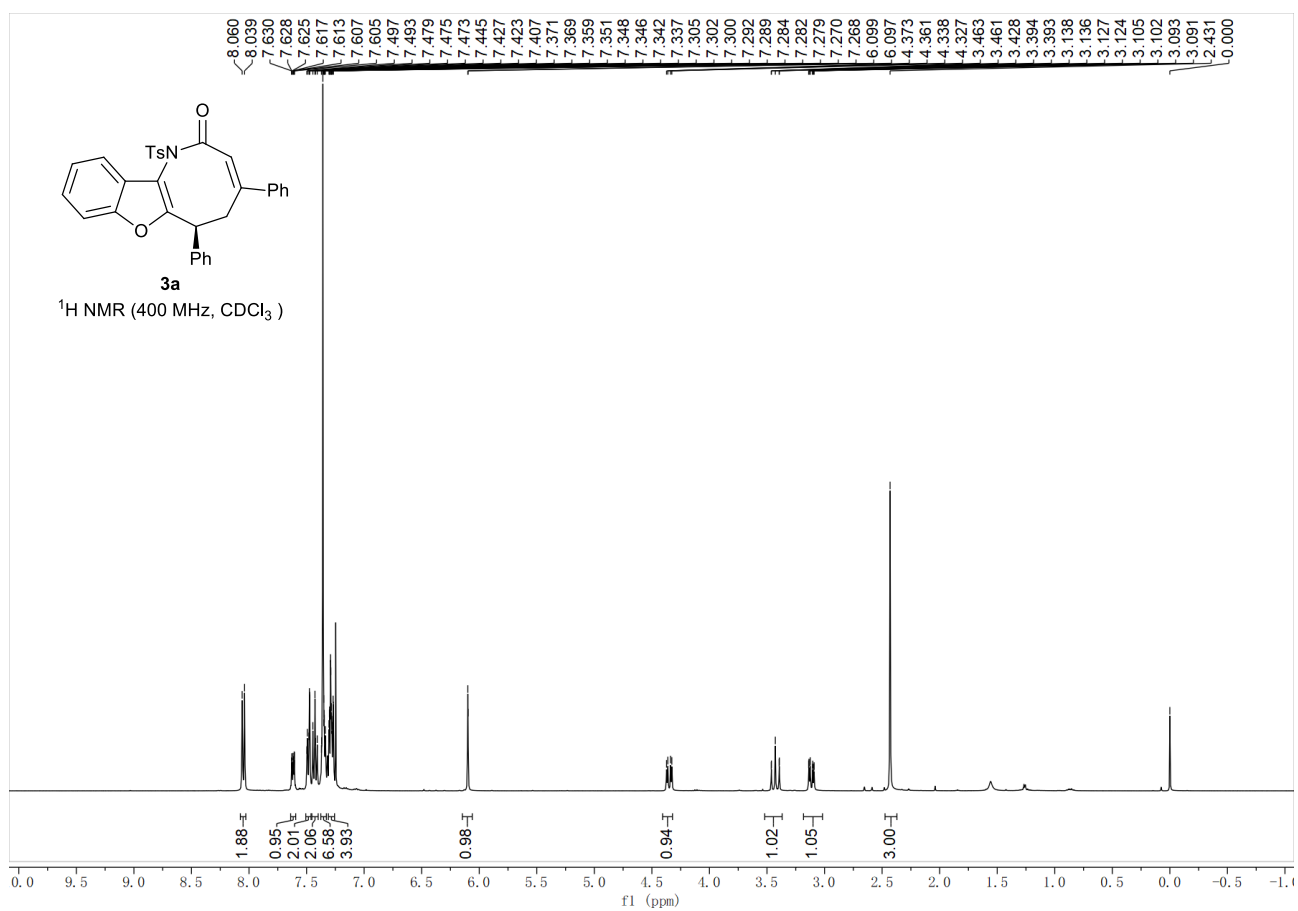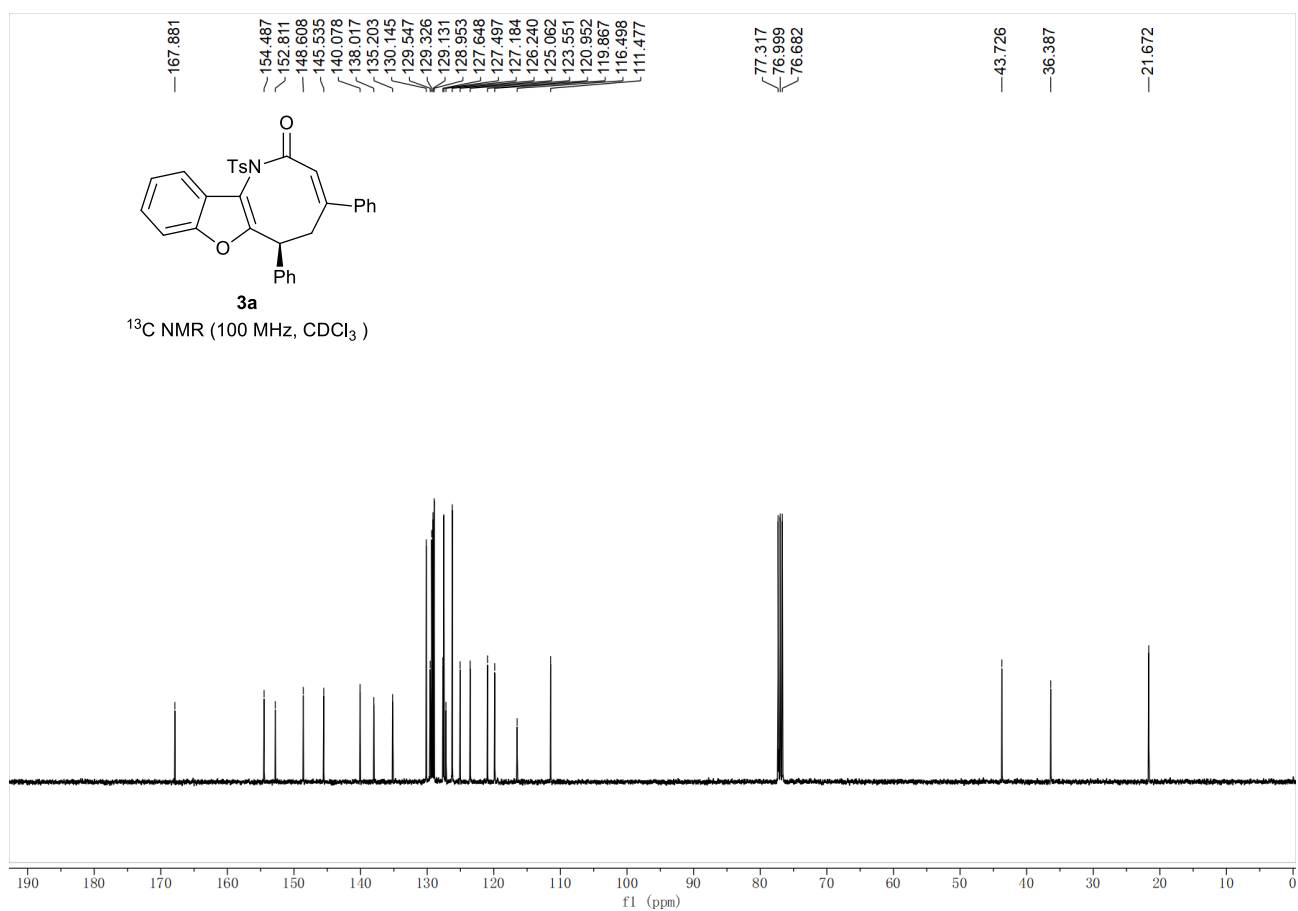

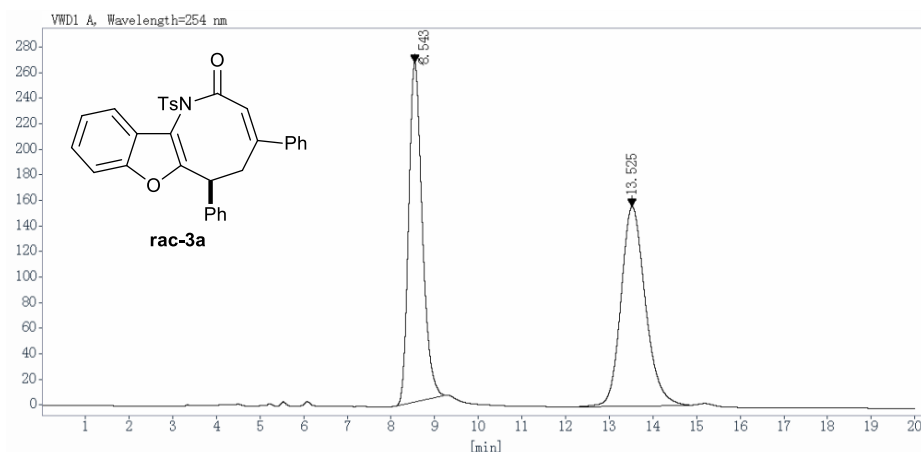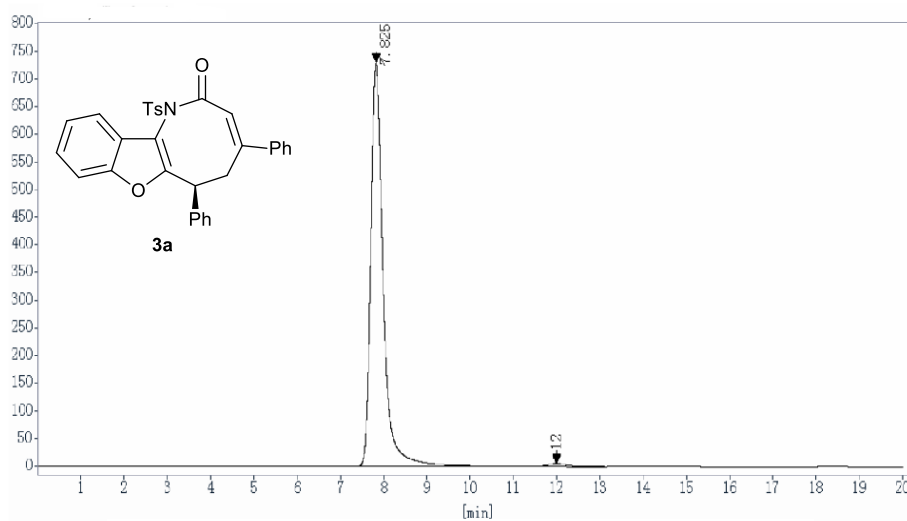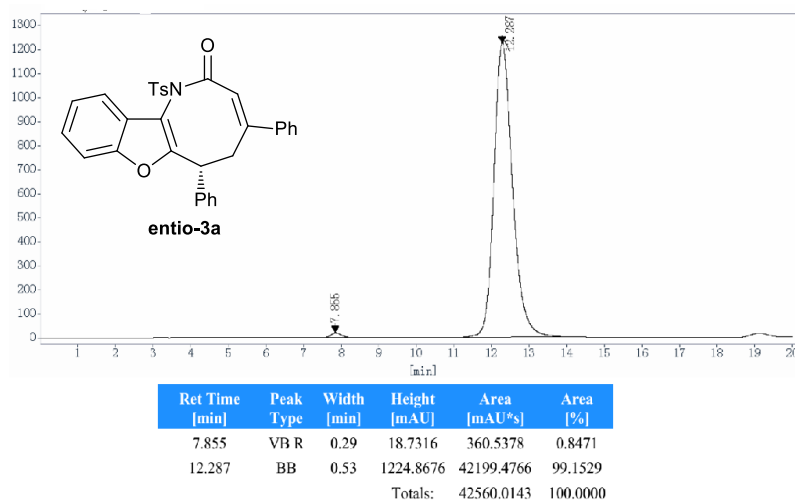



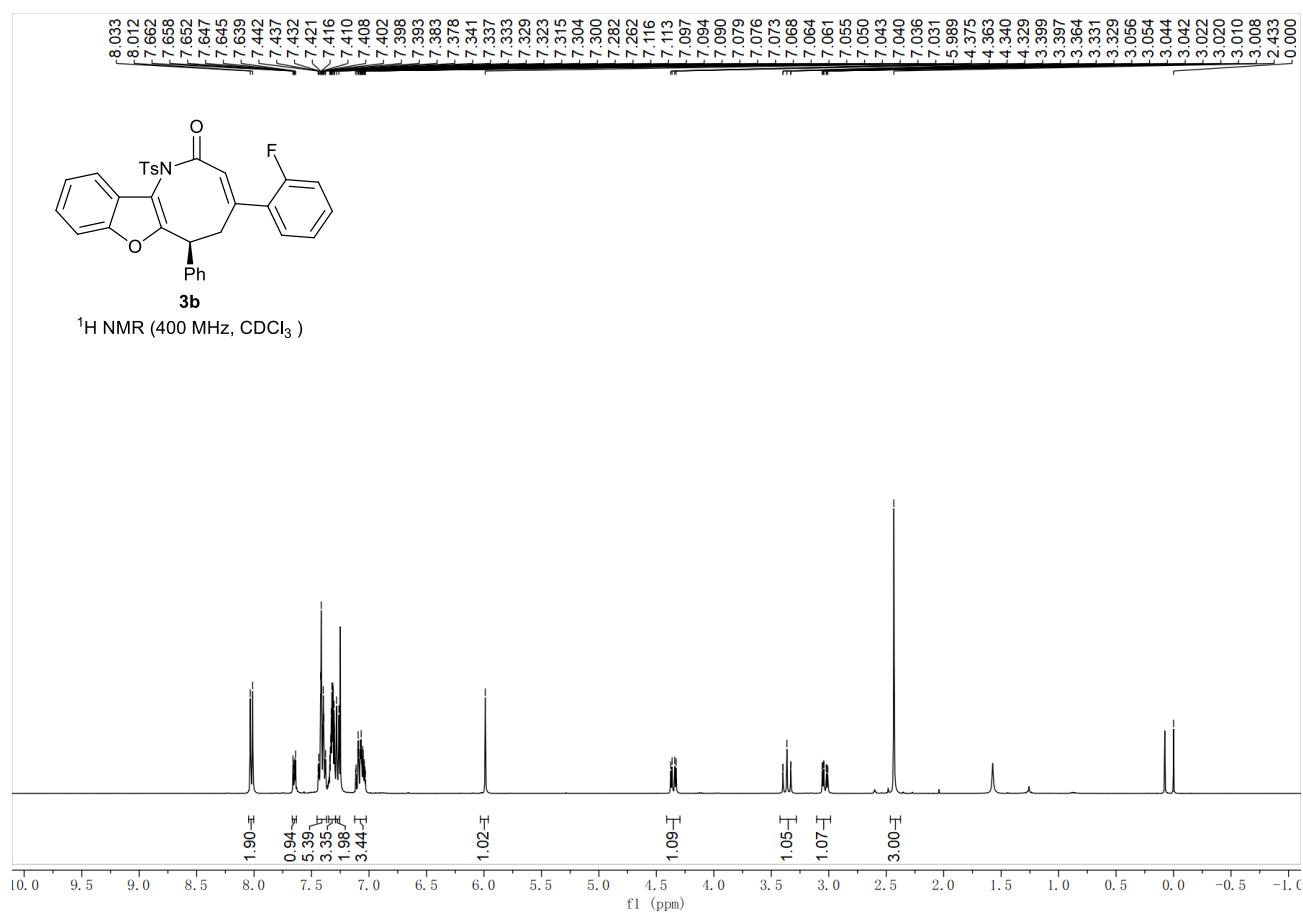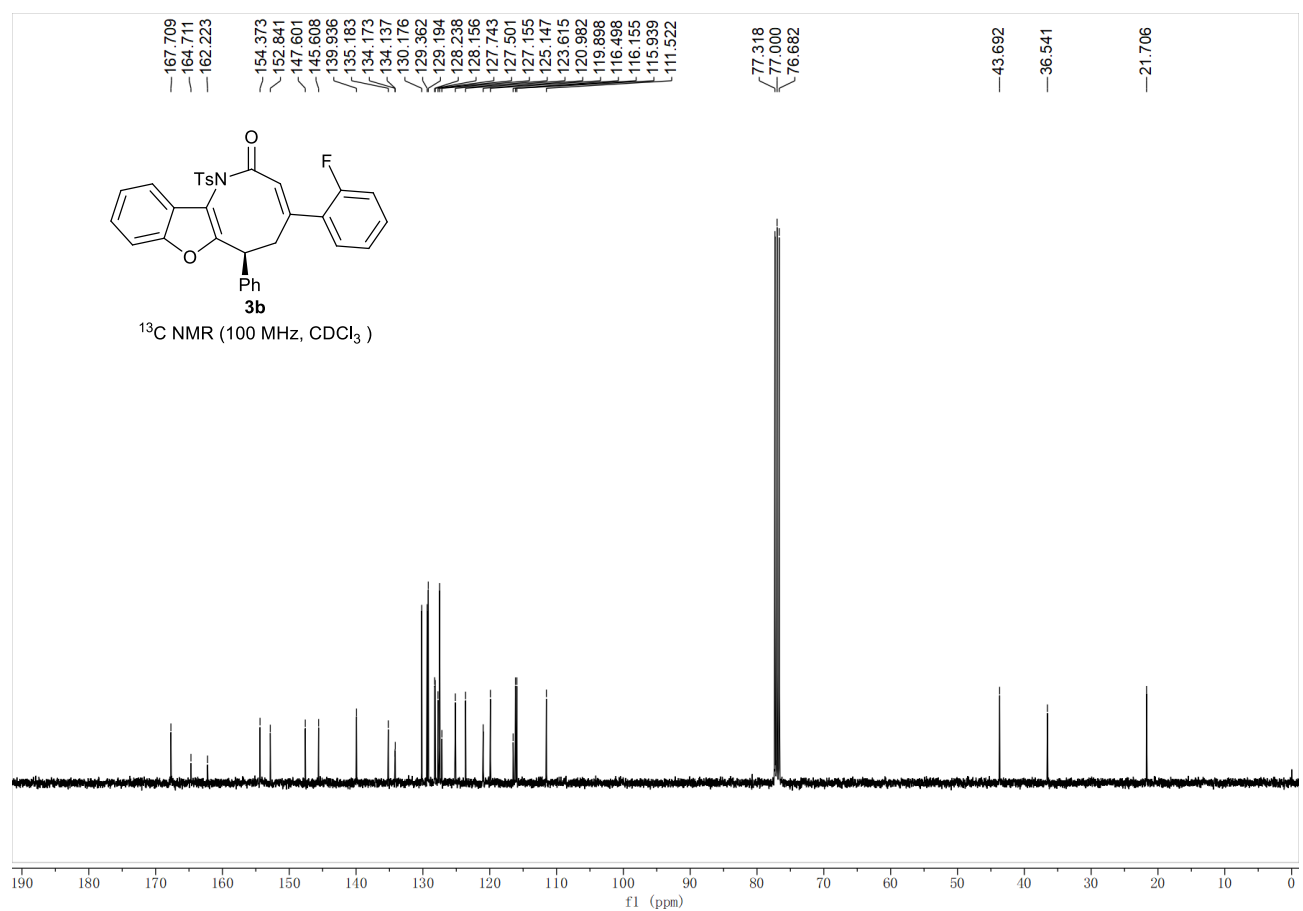

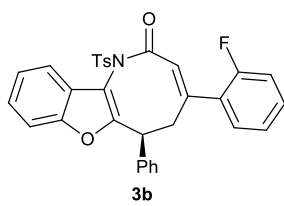

$^{19}\text{F}$  NMR (376 MHz,  $\text{CDCl}_3$ )

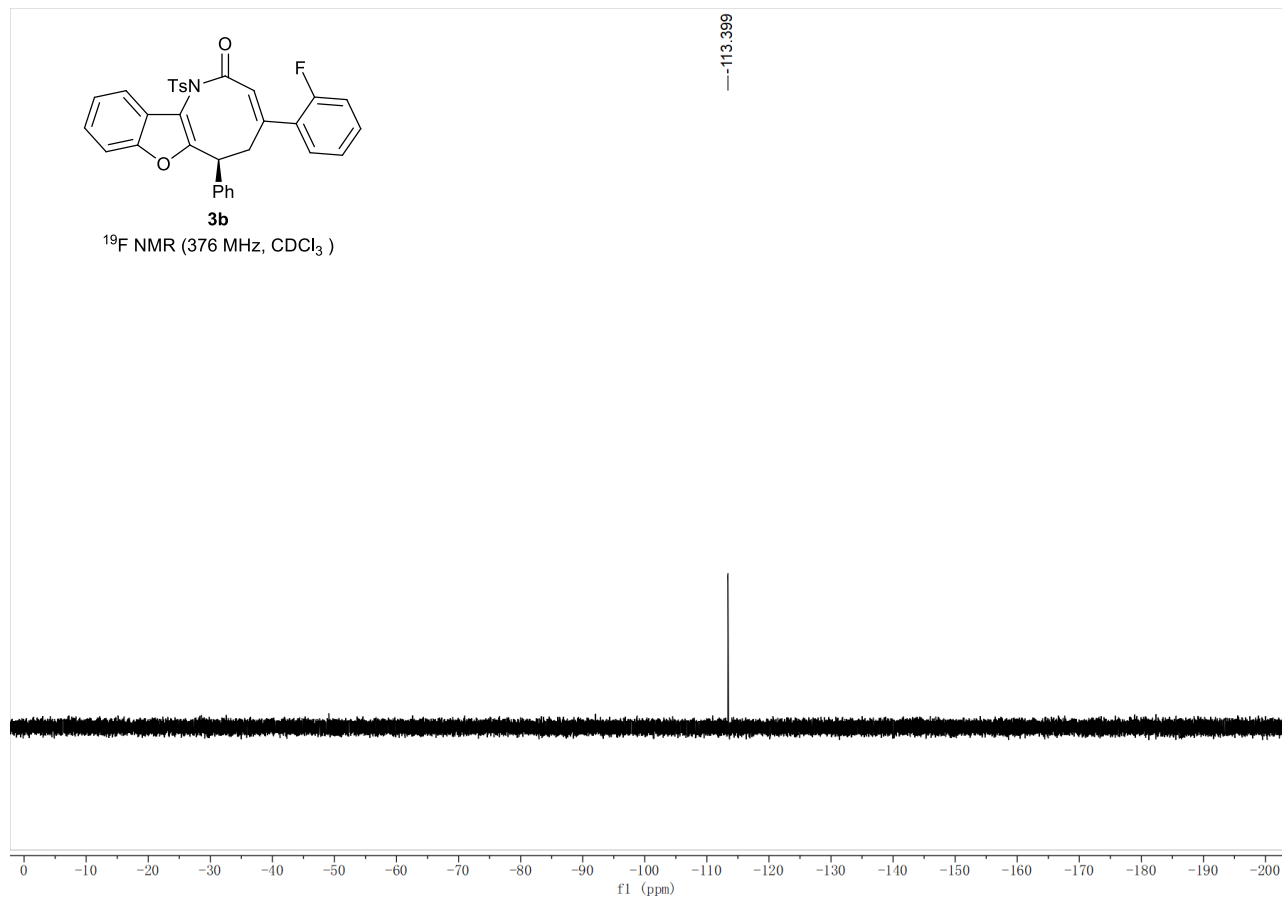

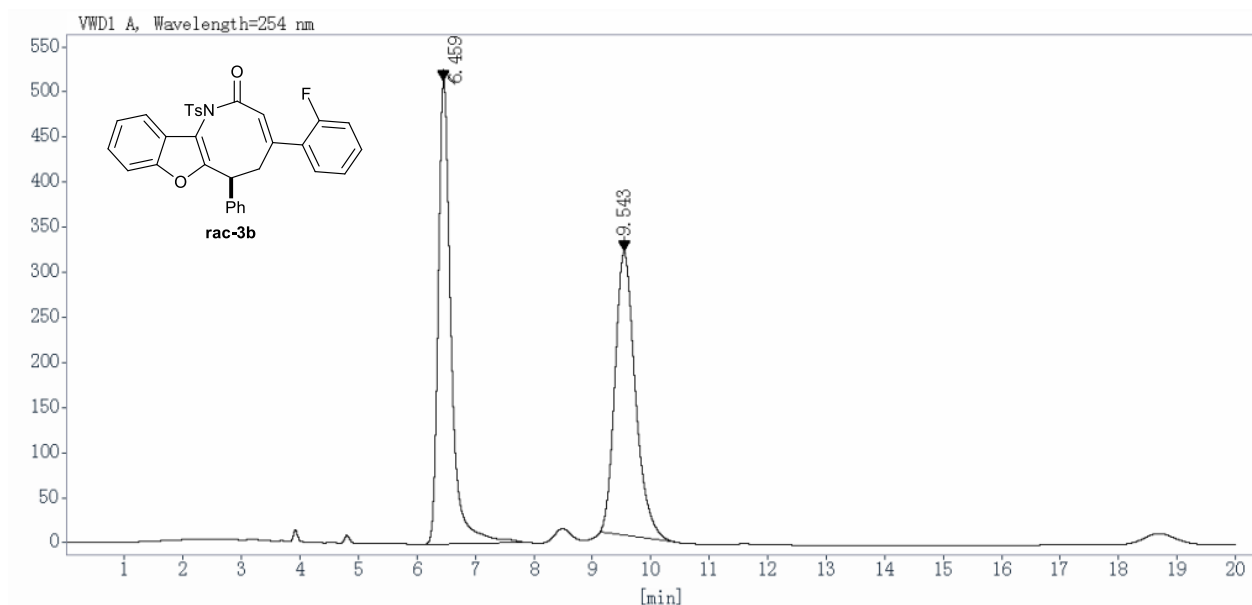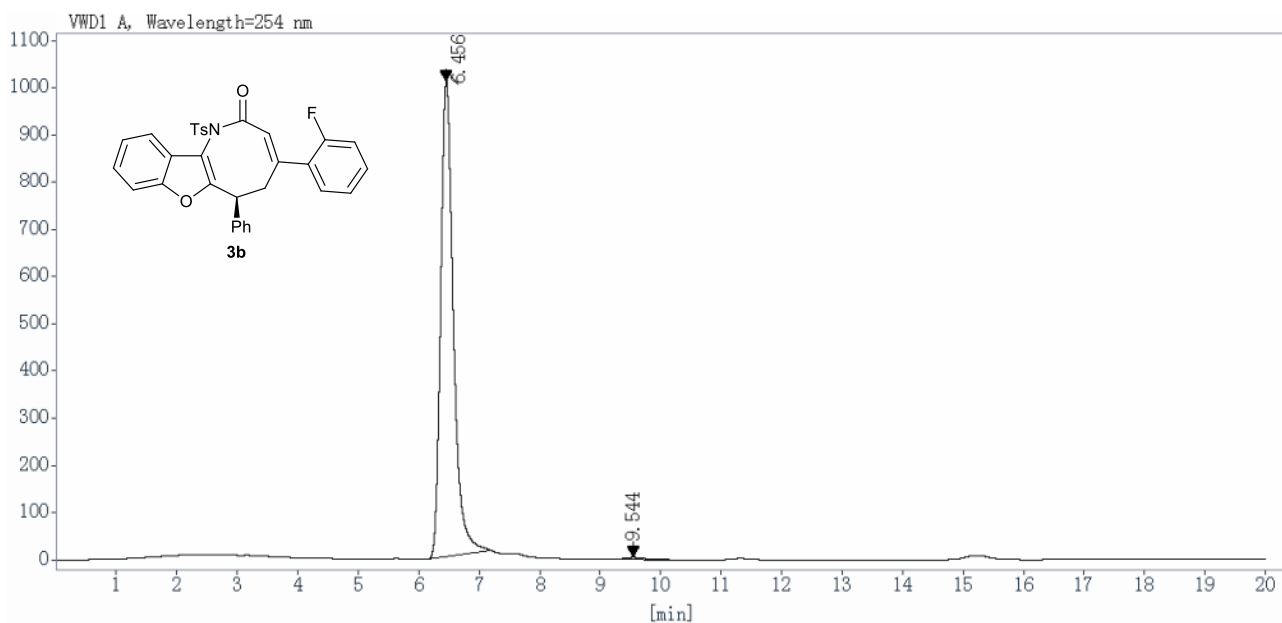

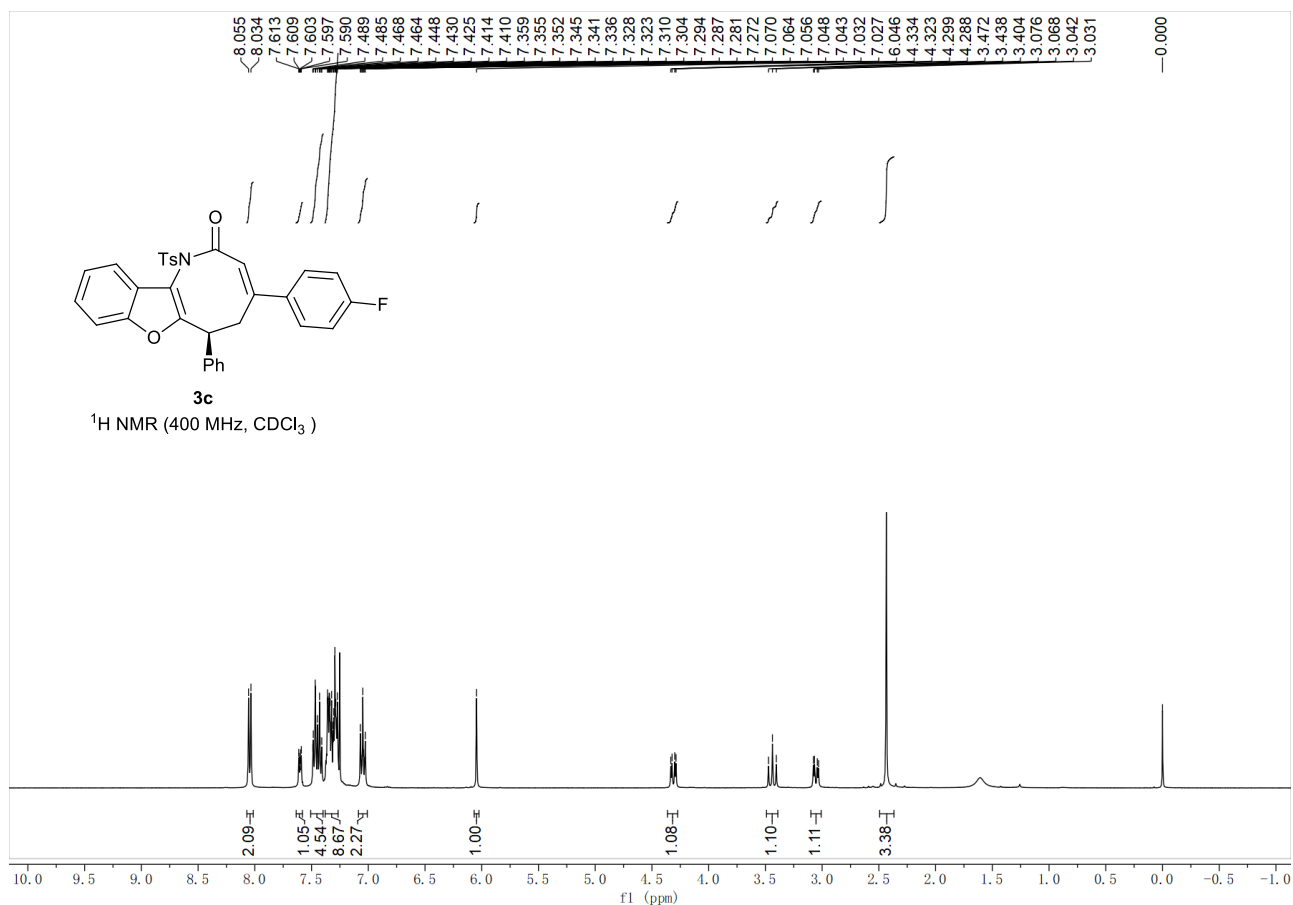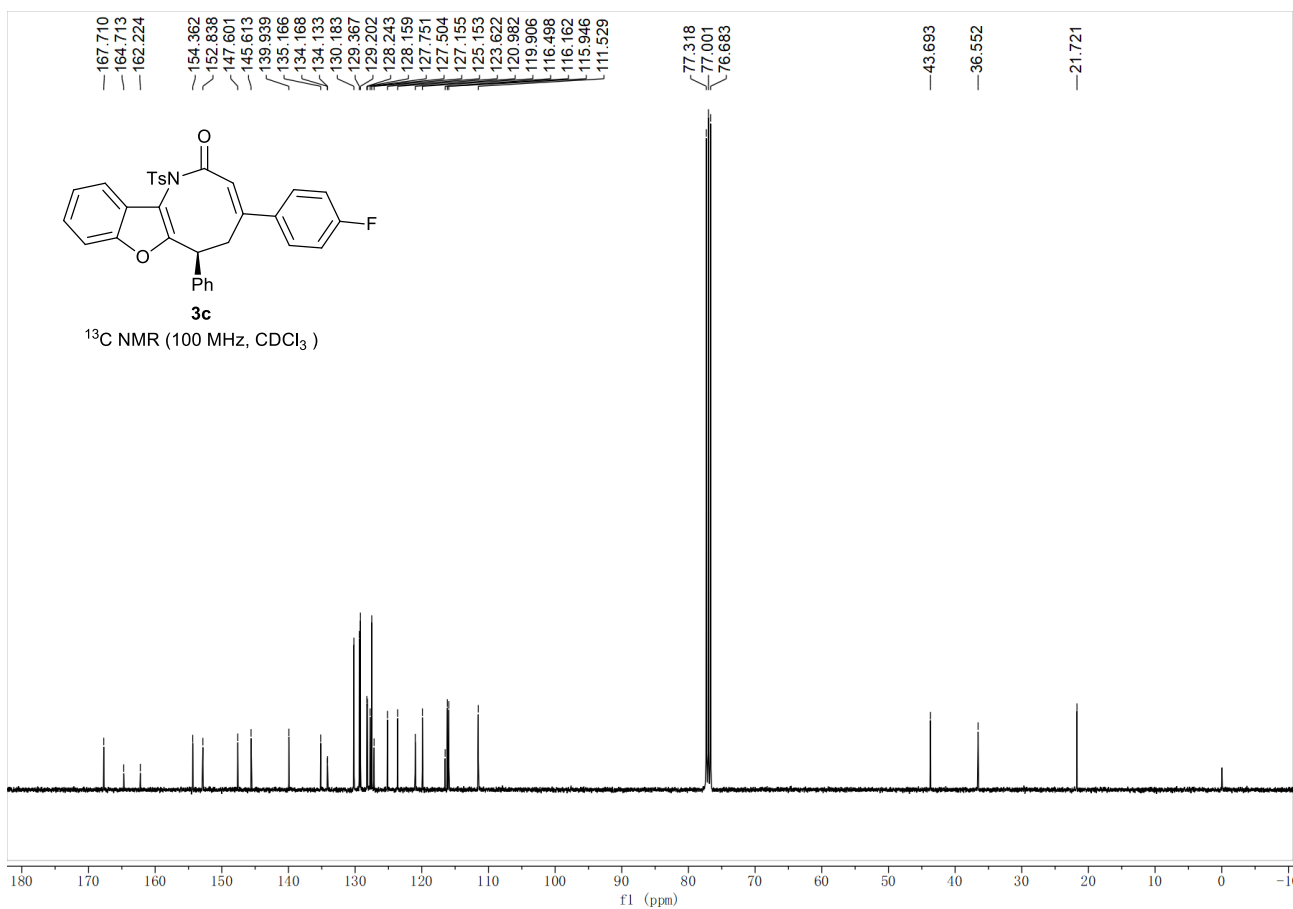

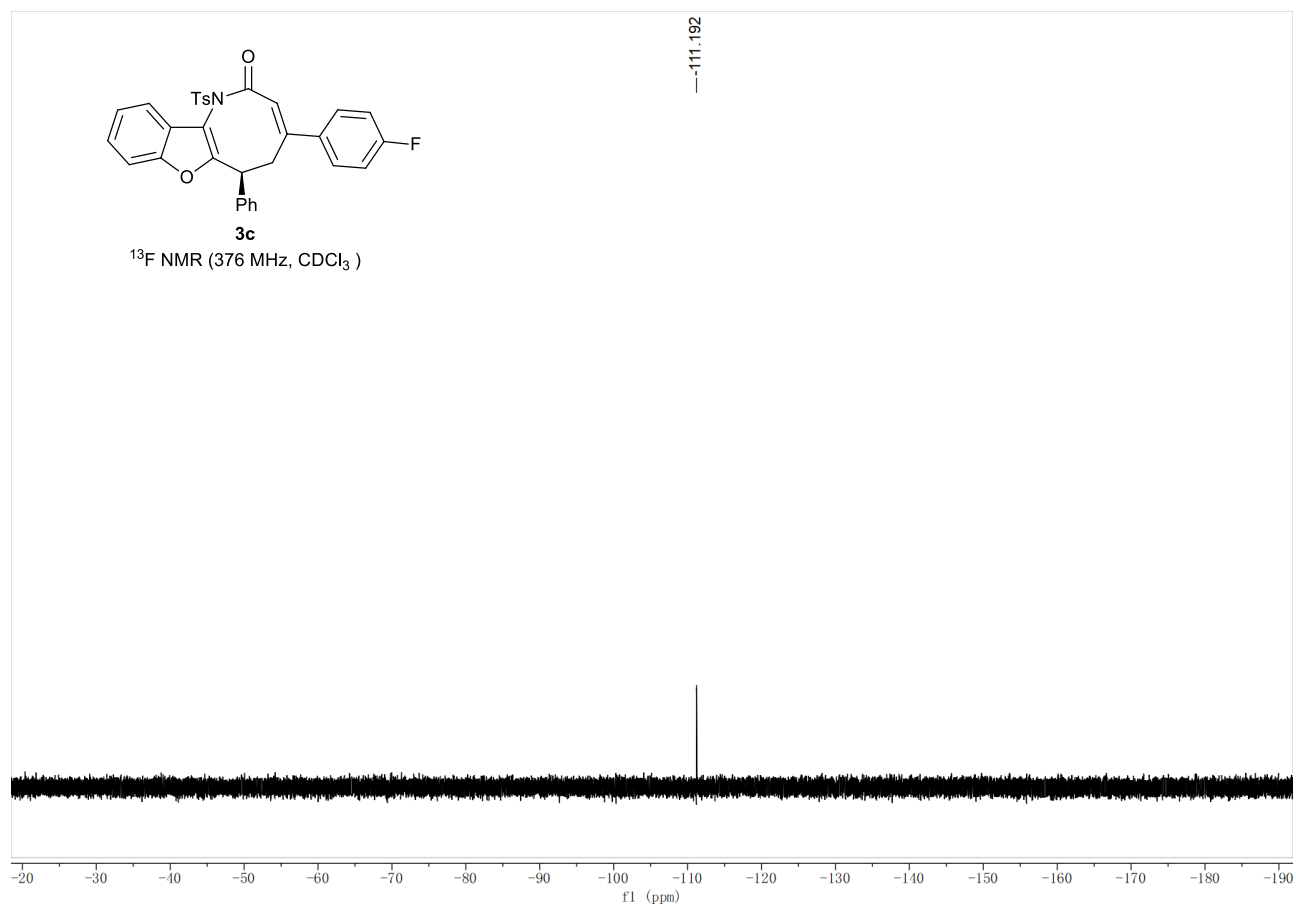

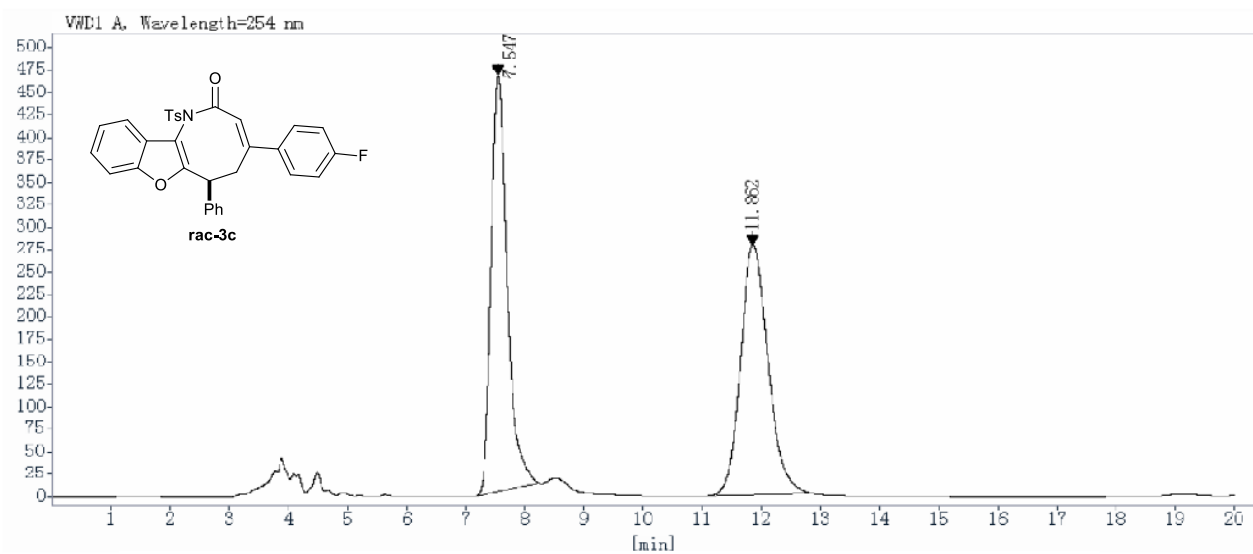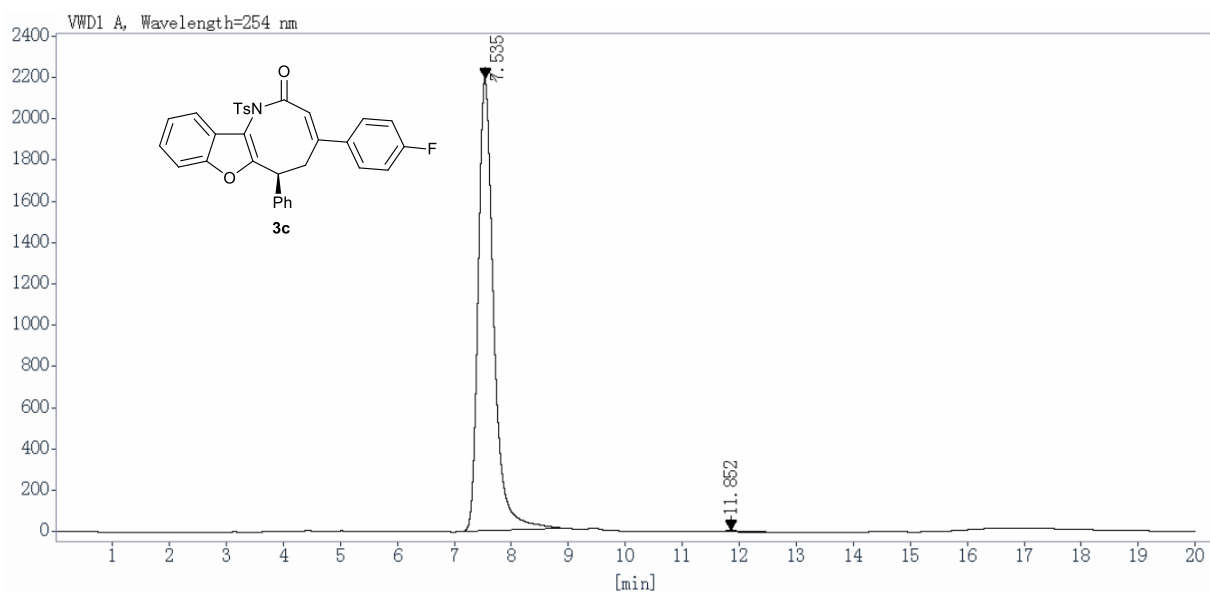

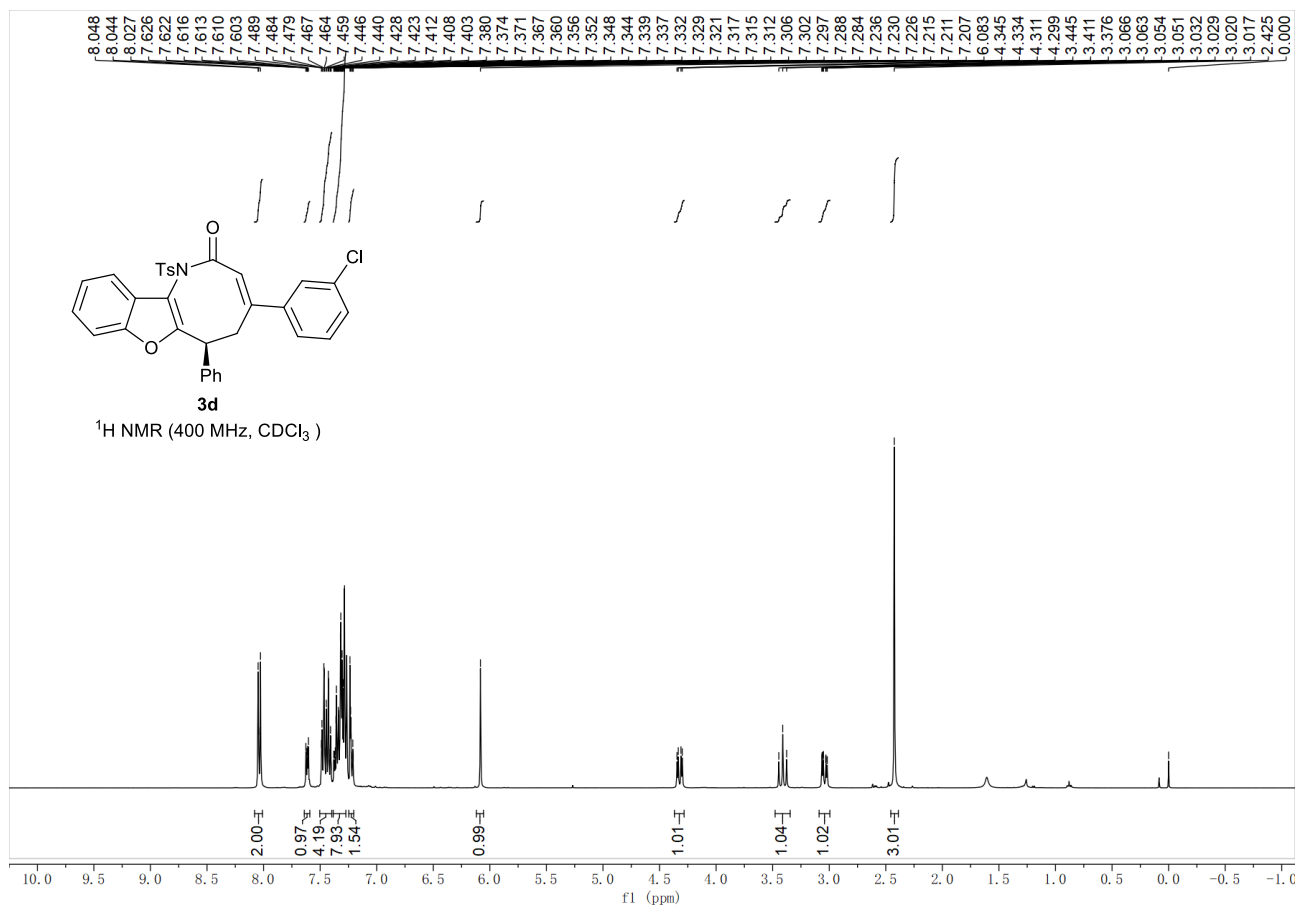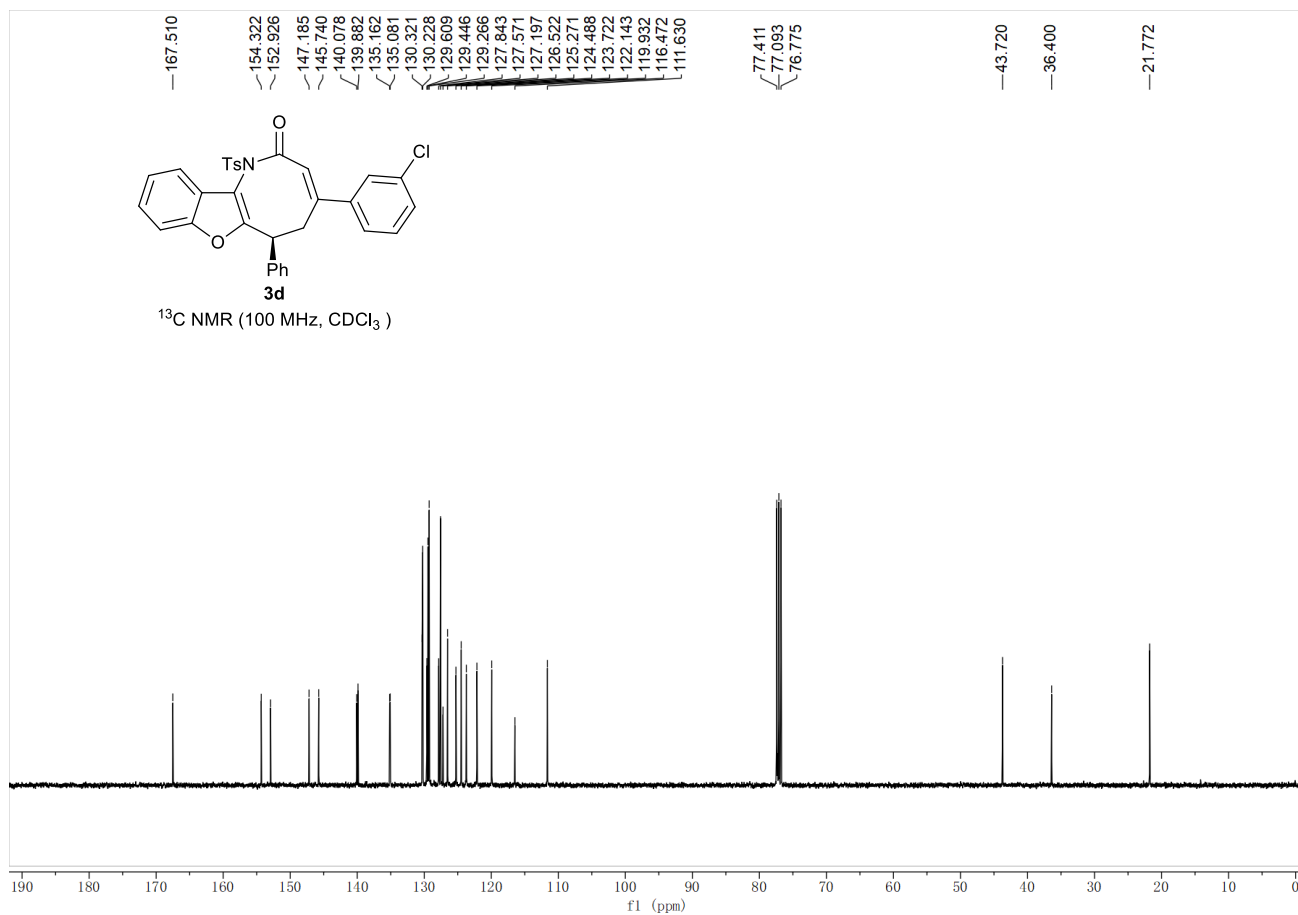

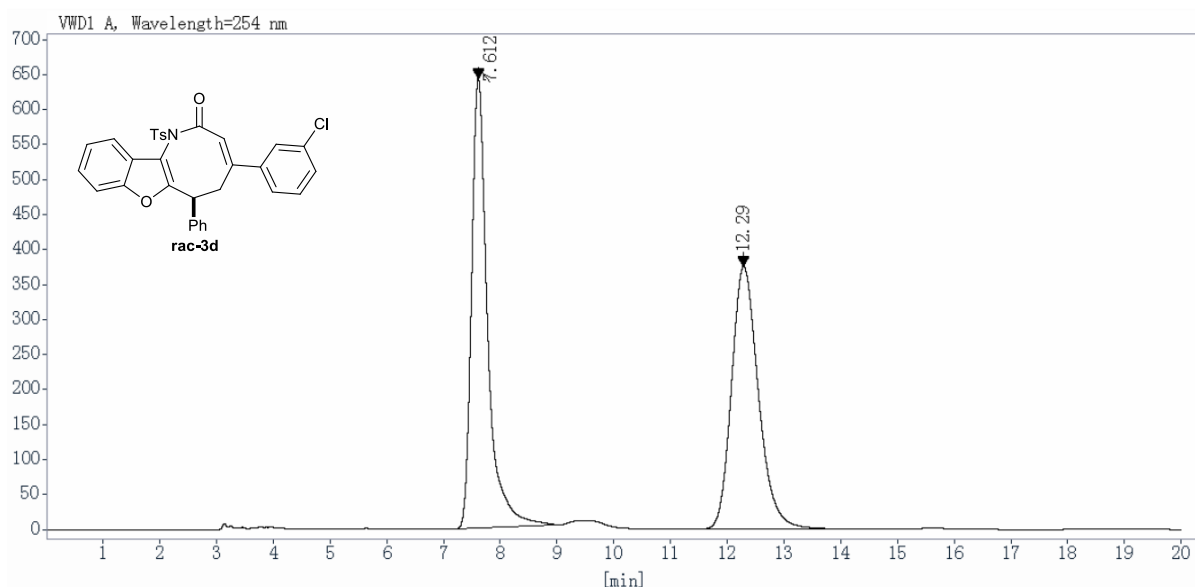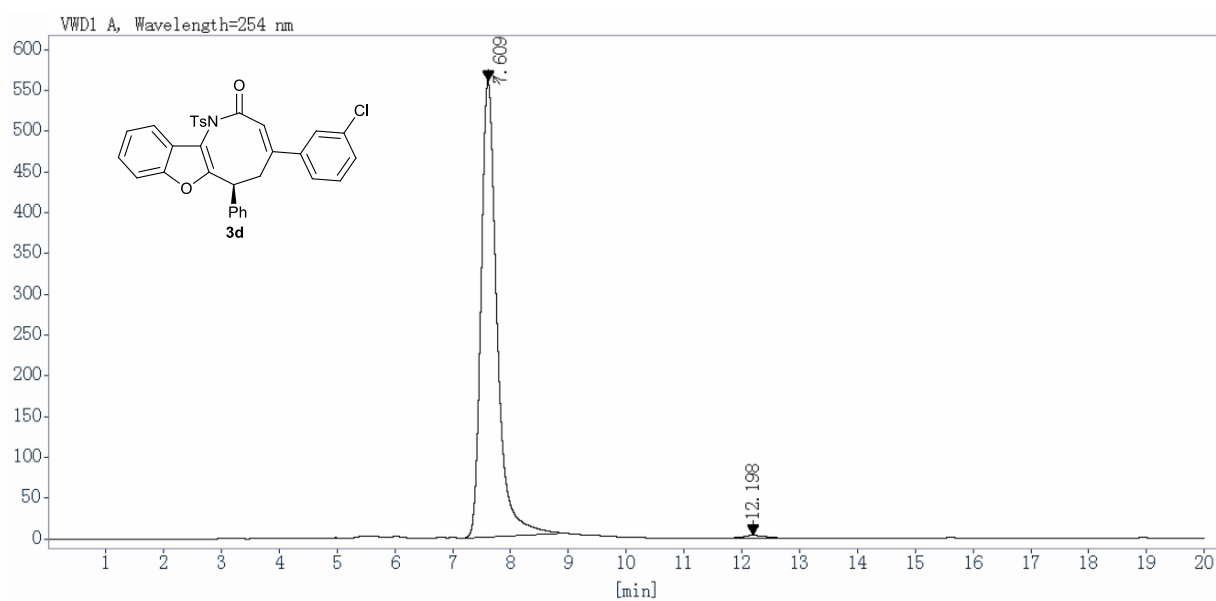



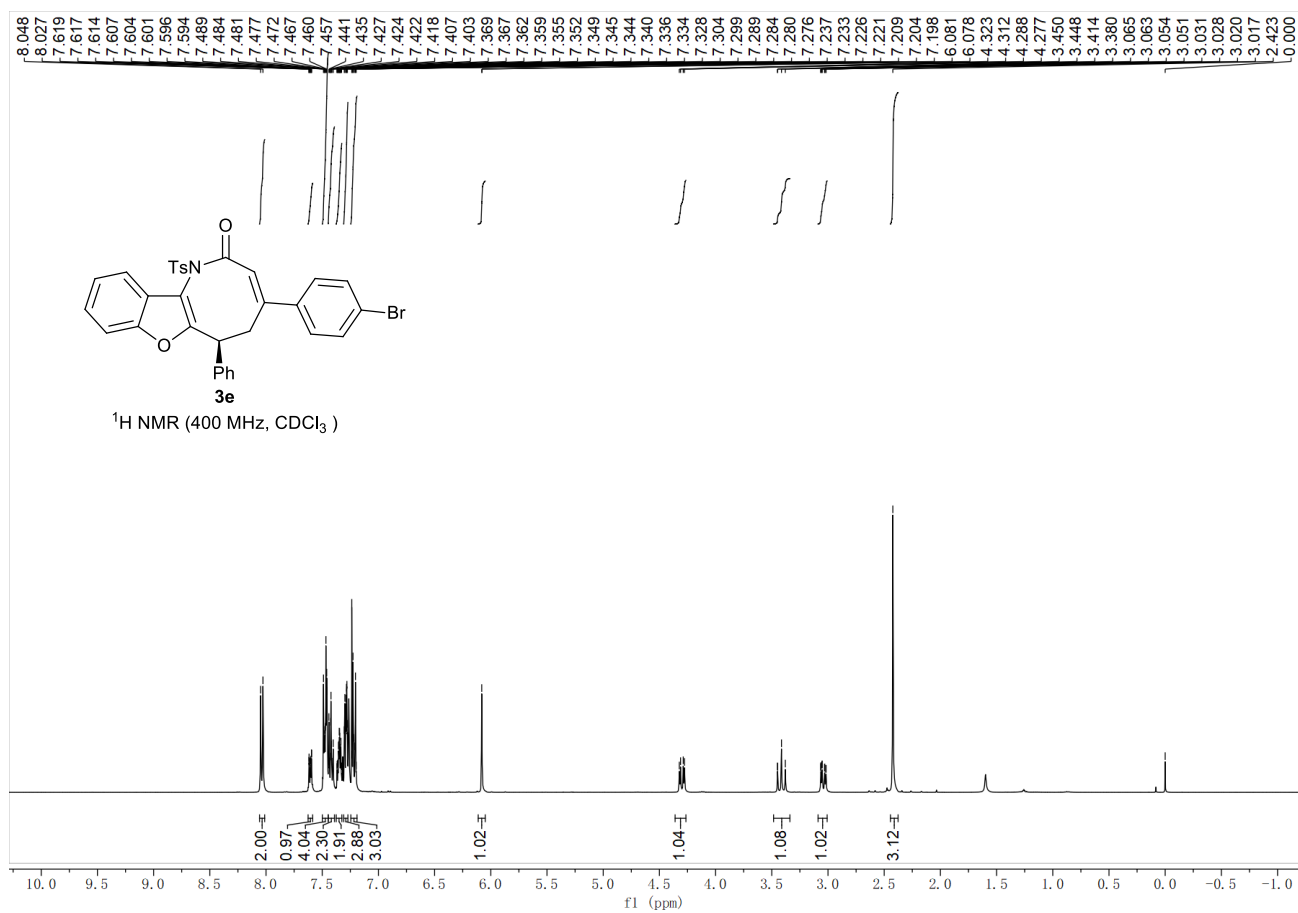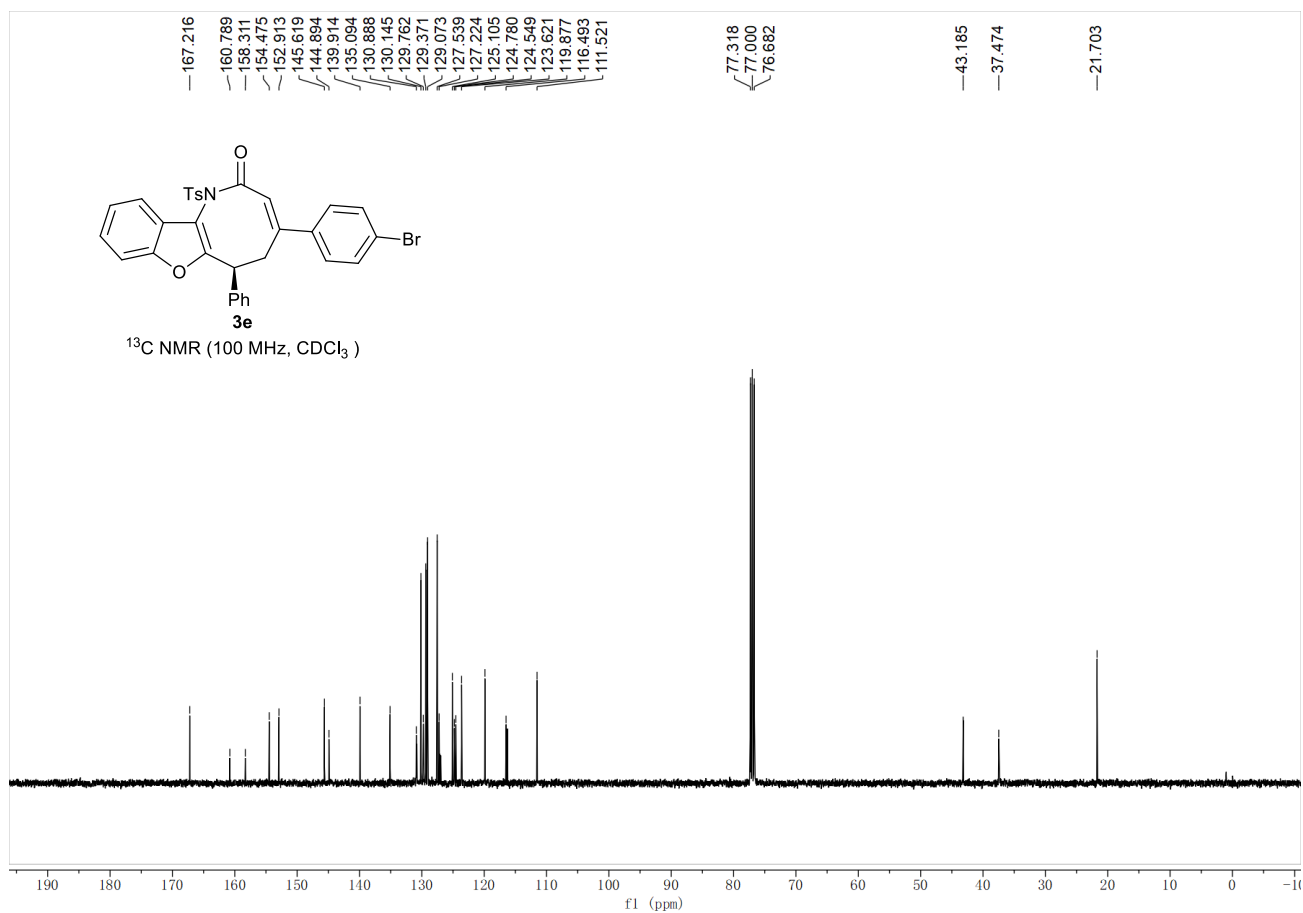

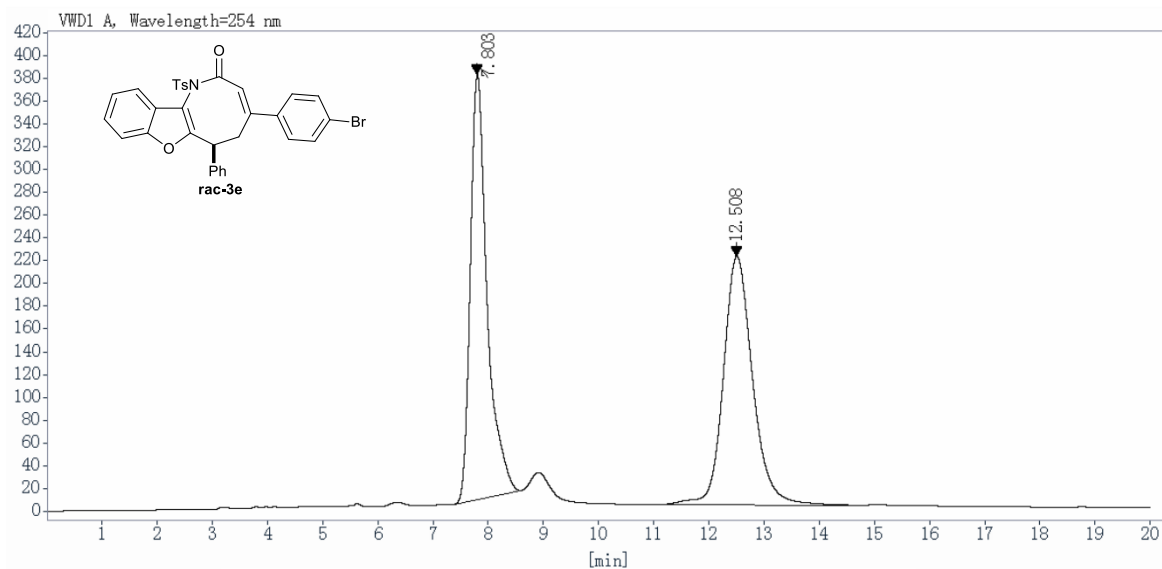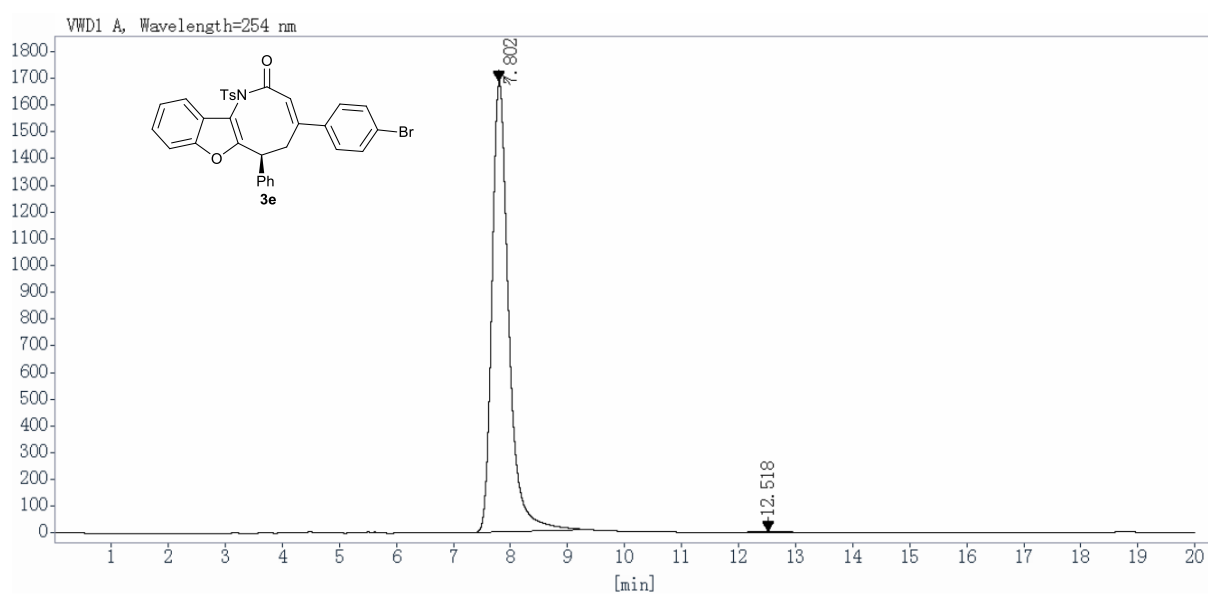

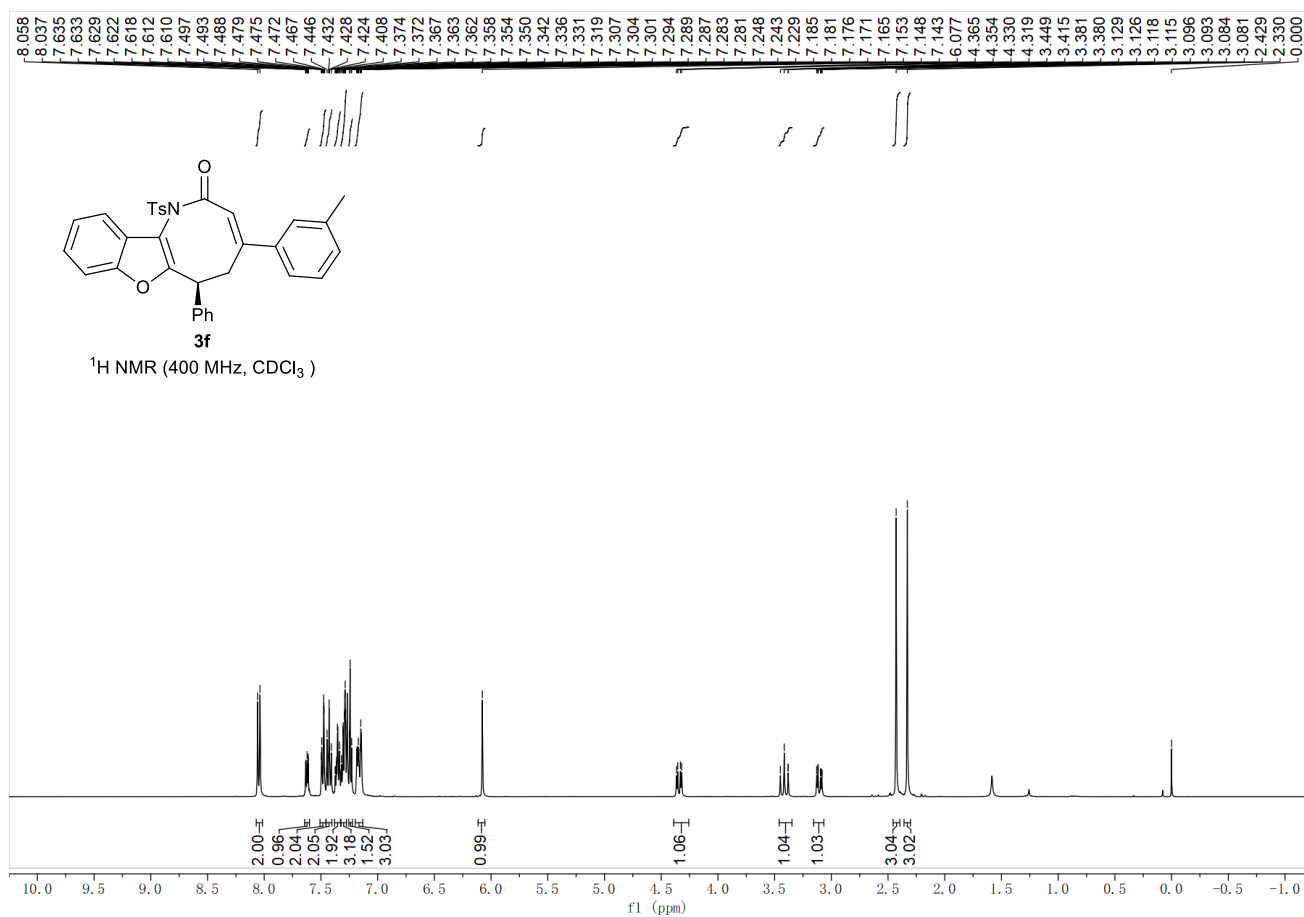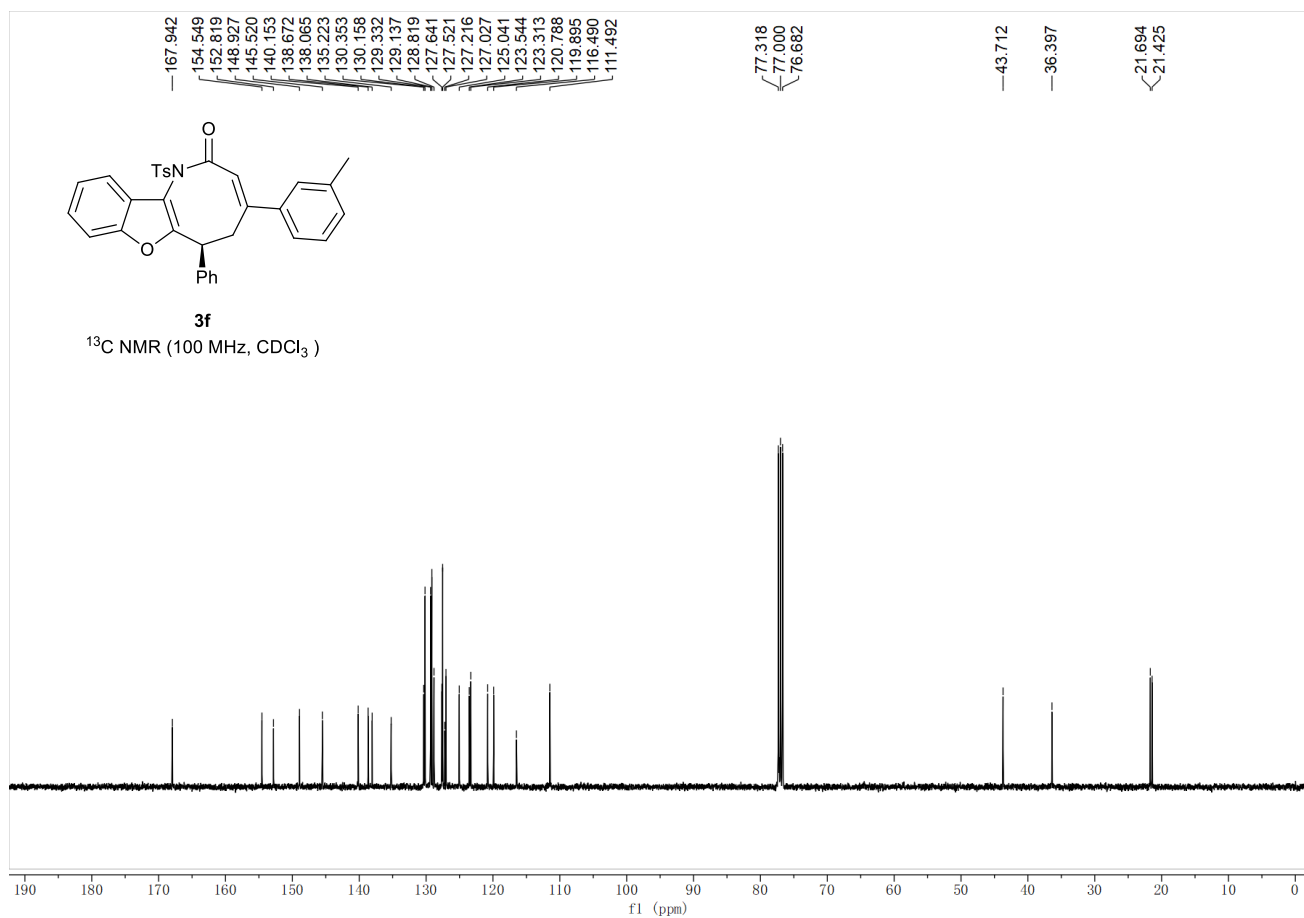

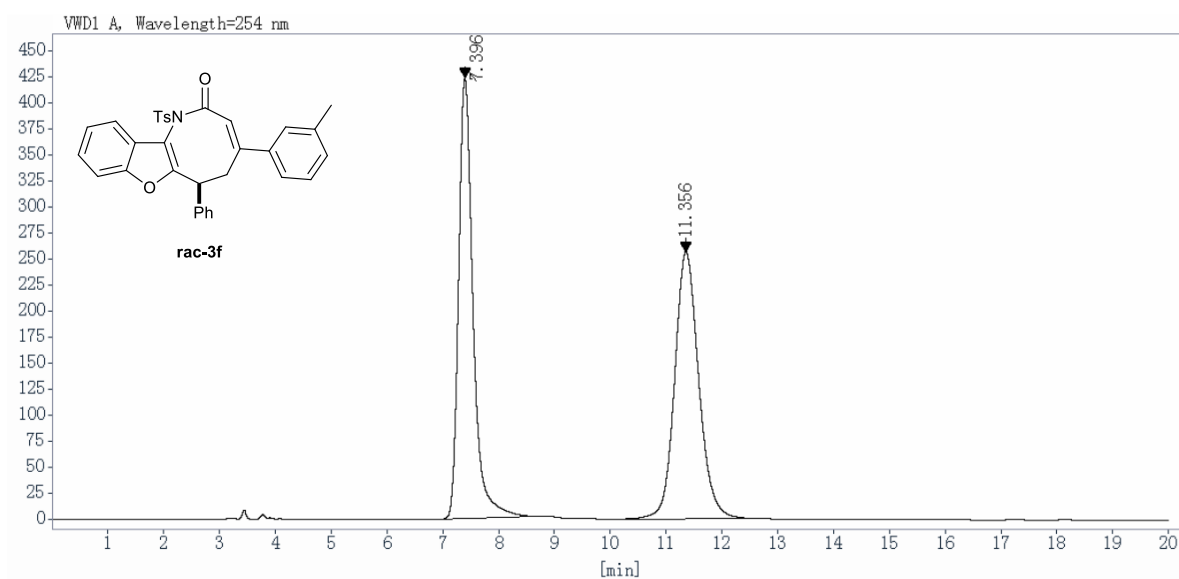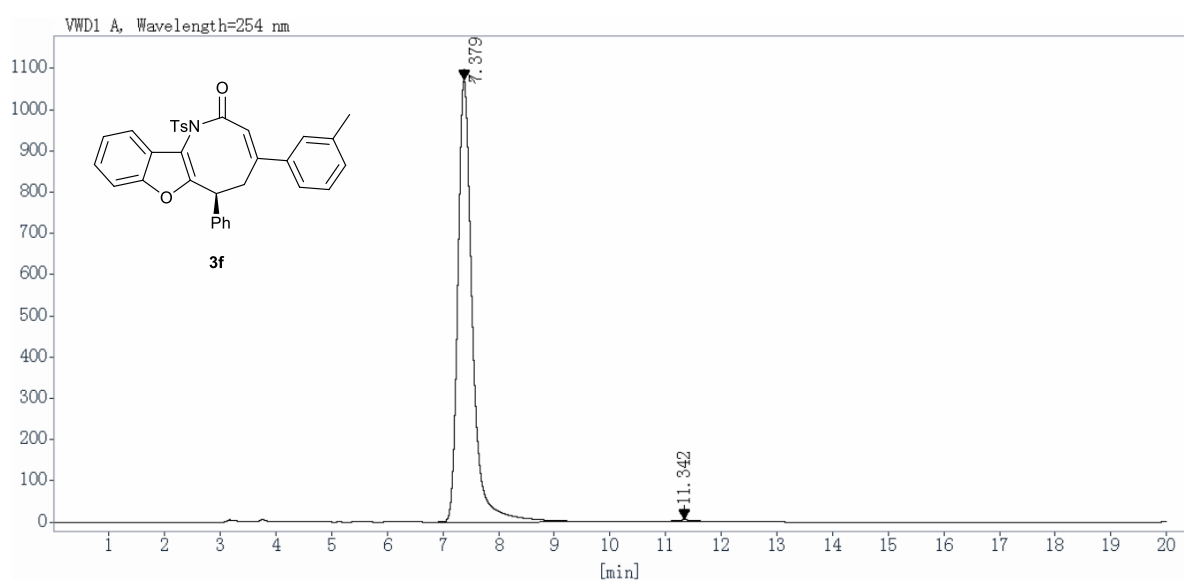

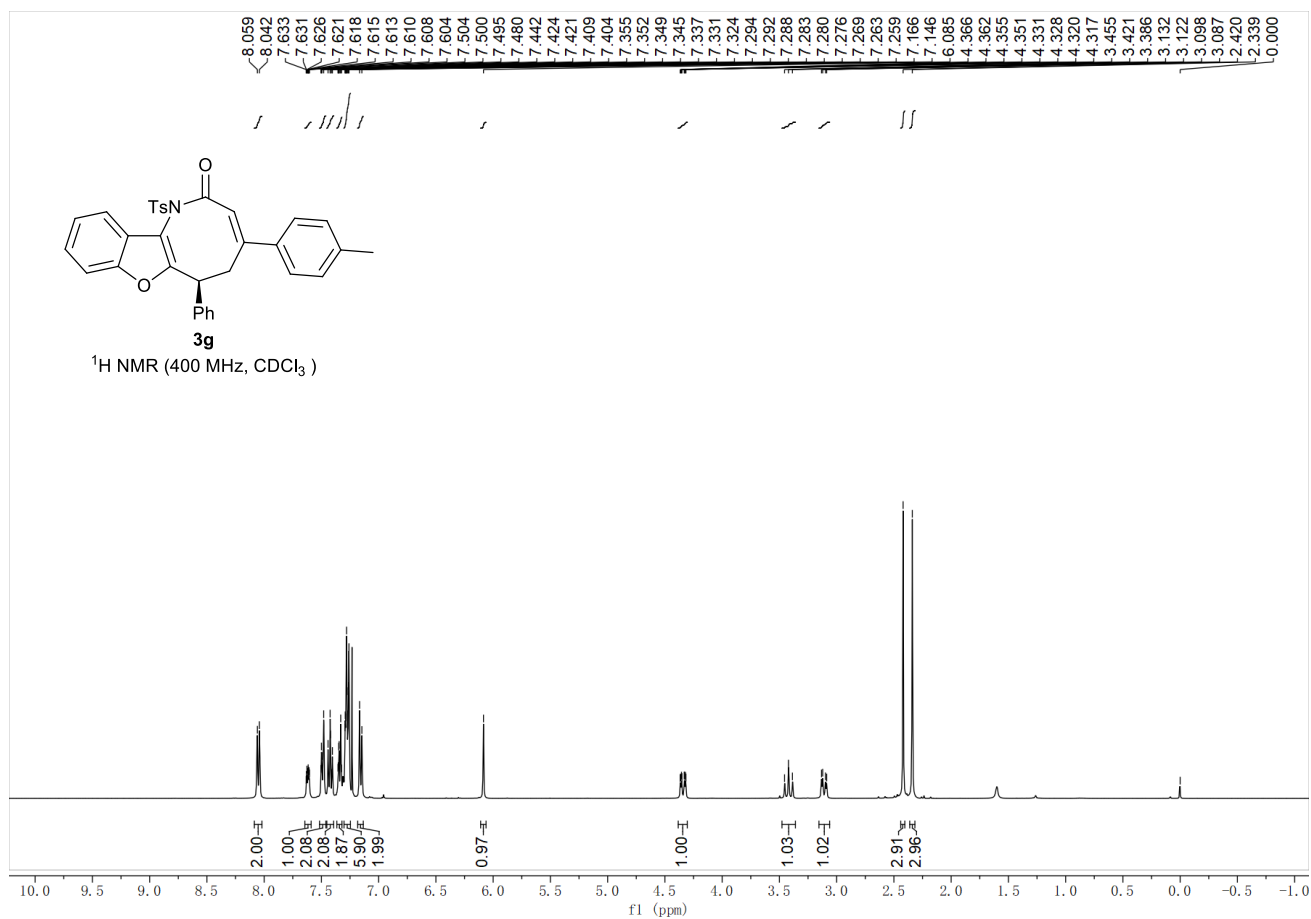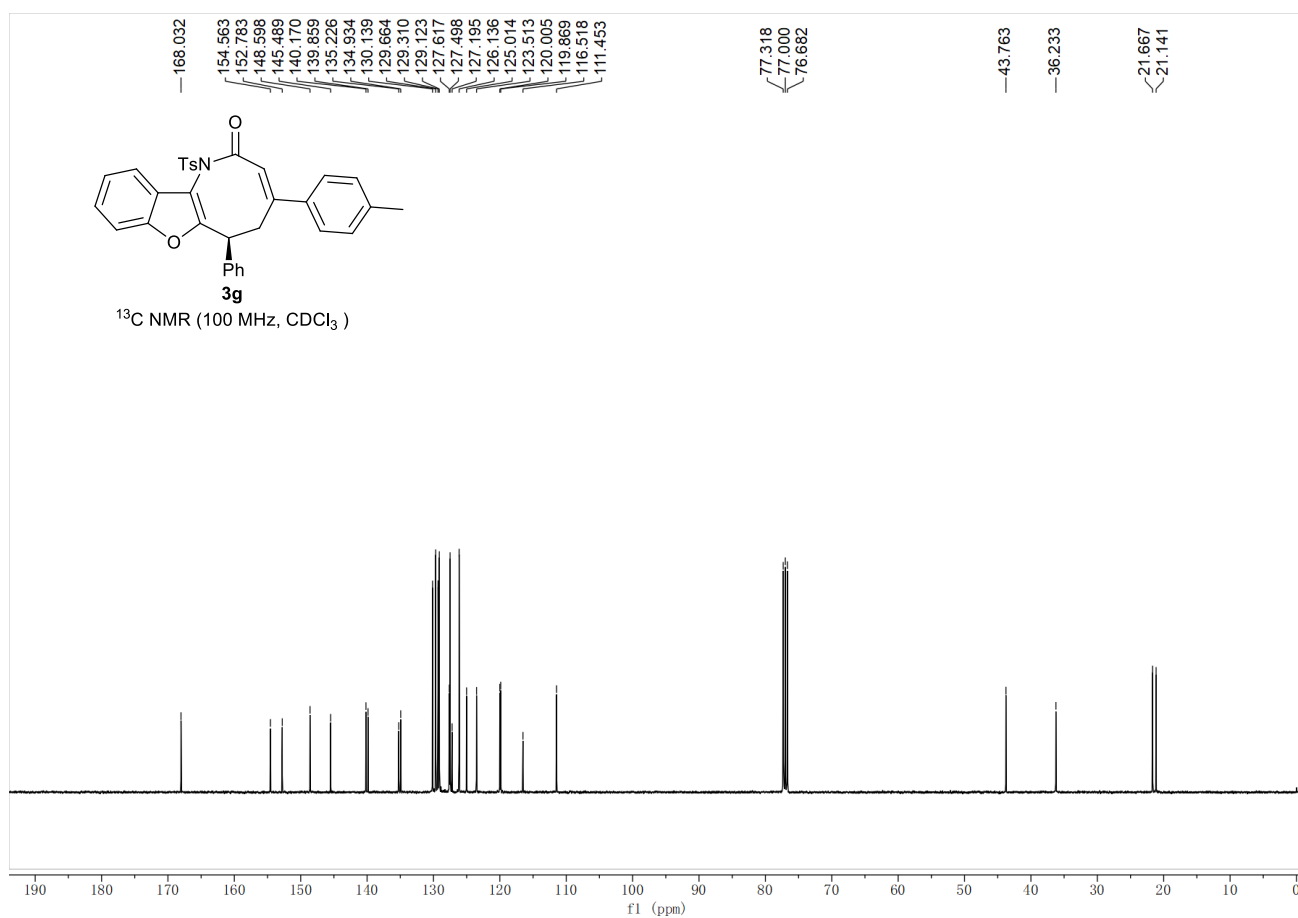

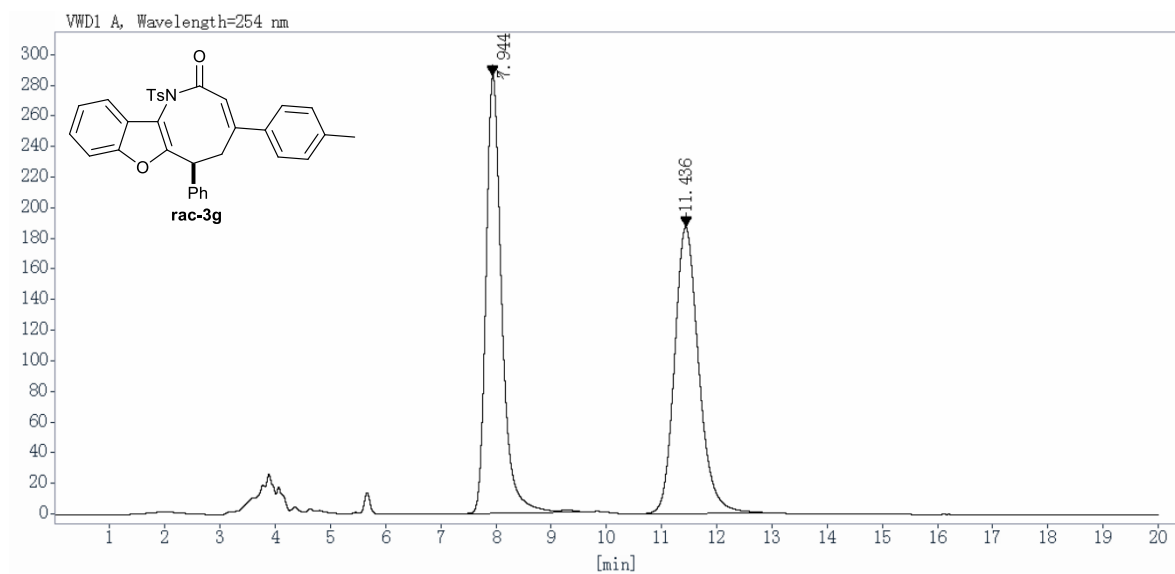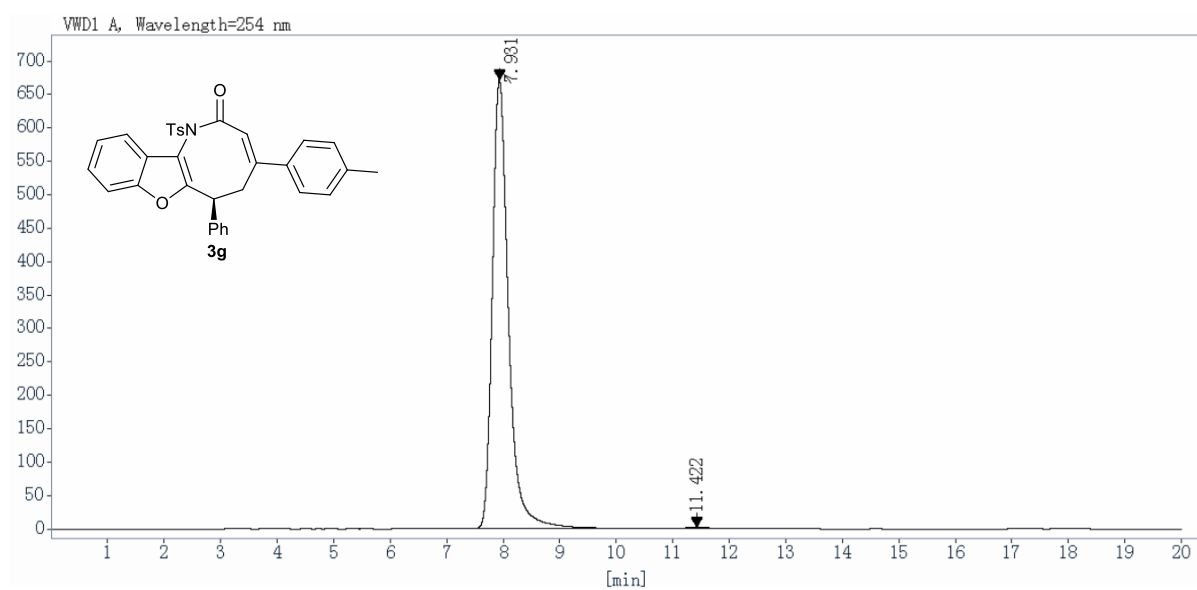

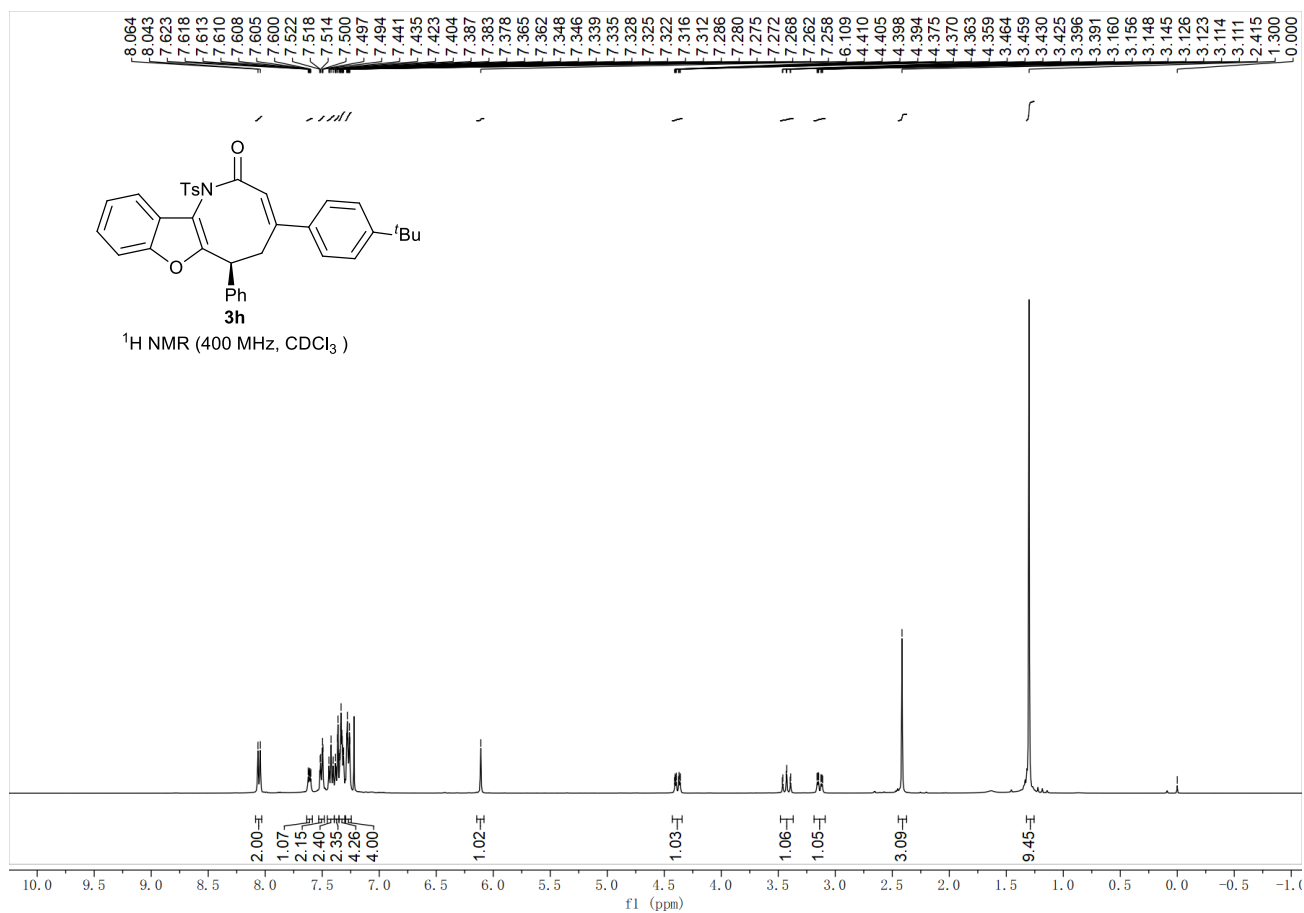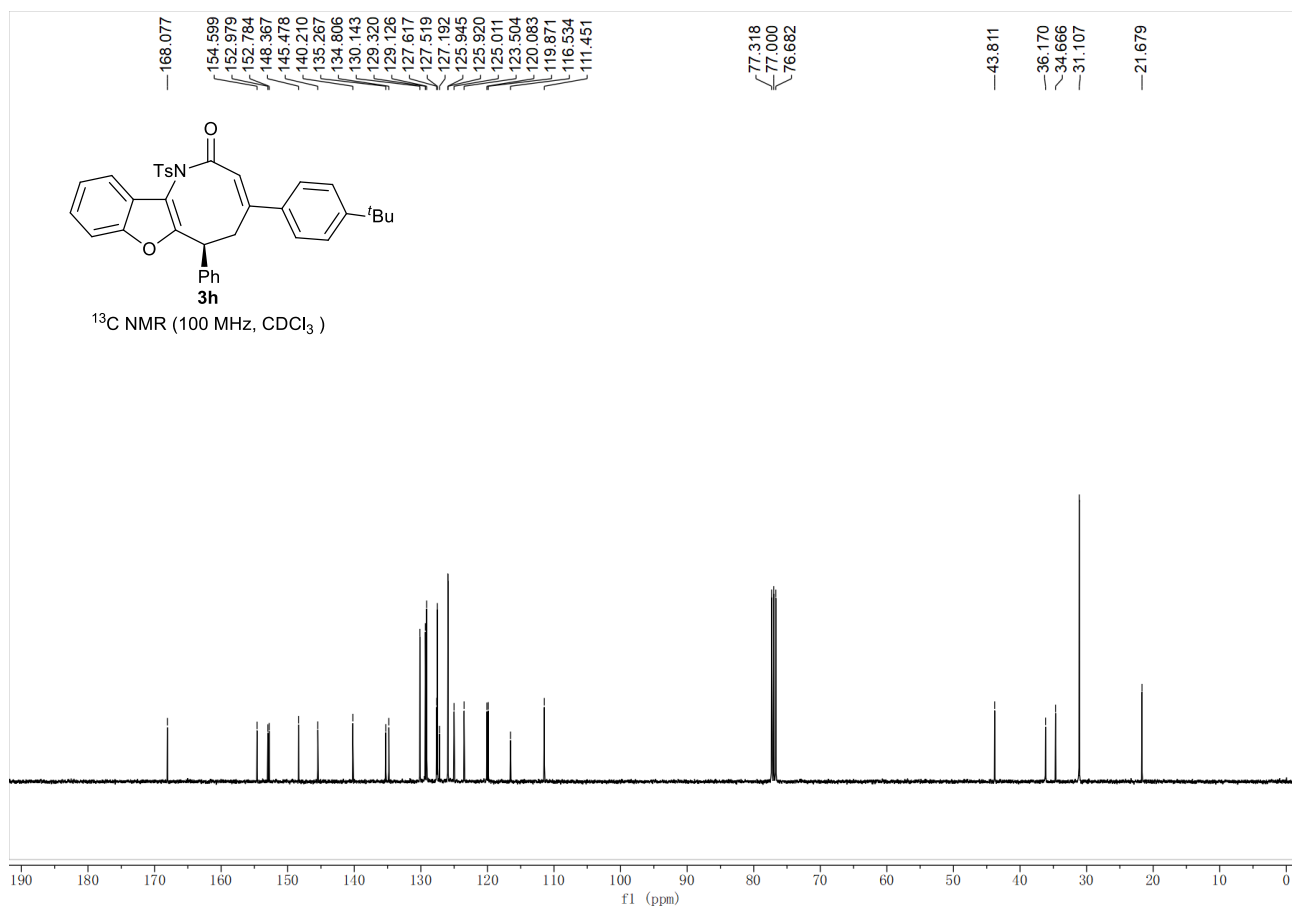

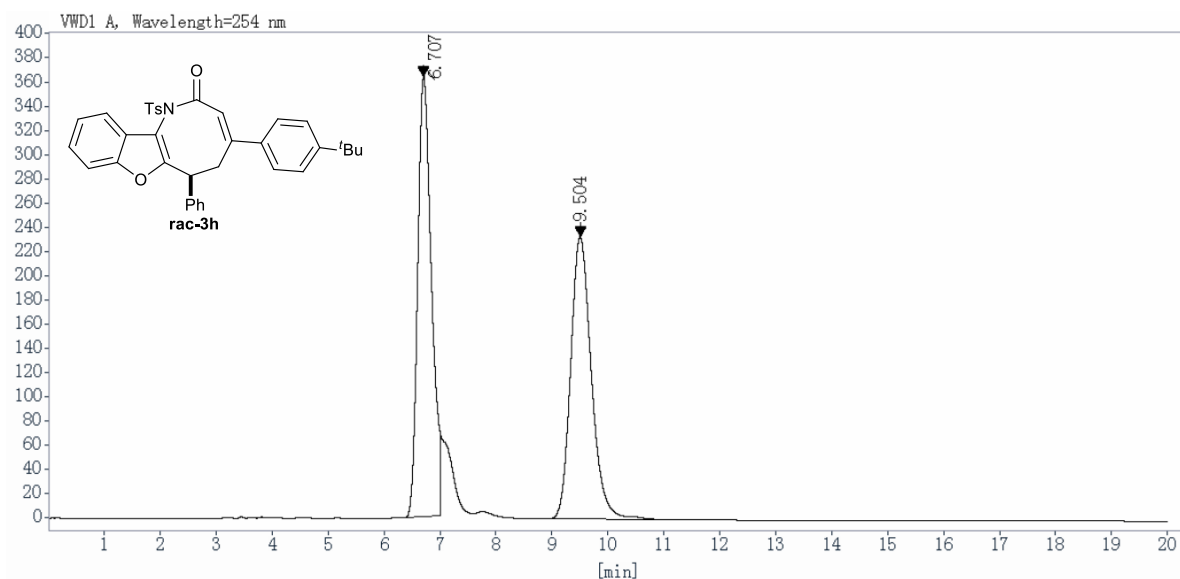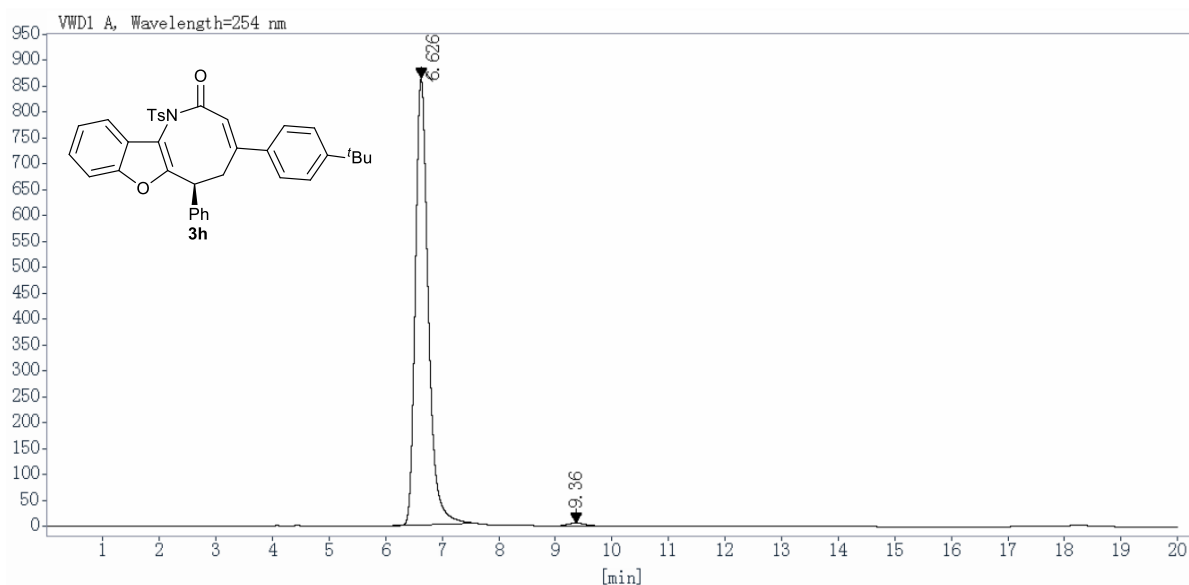



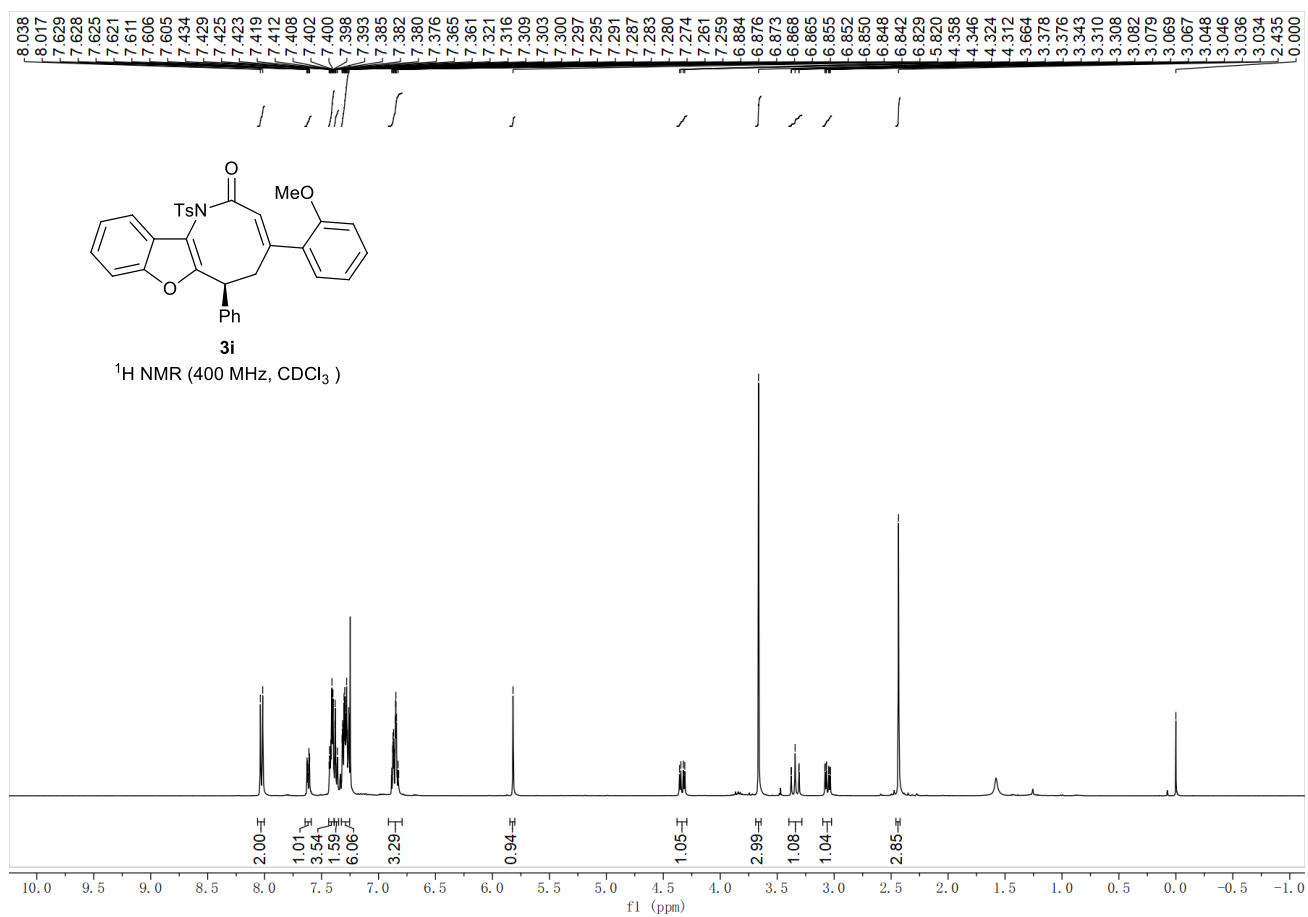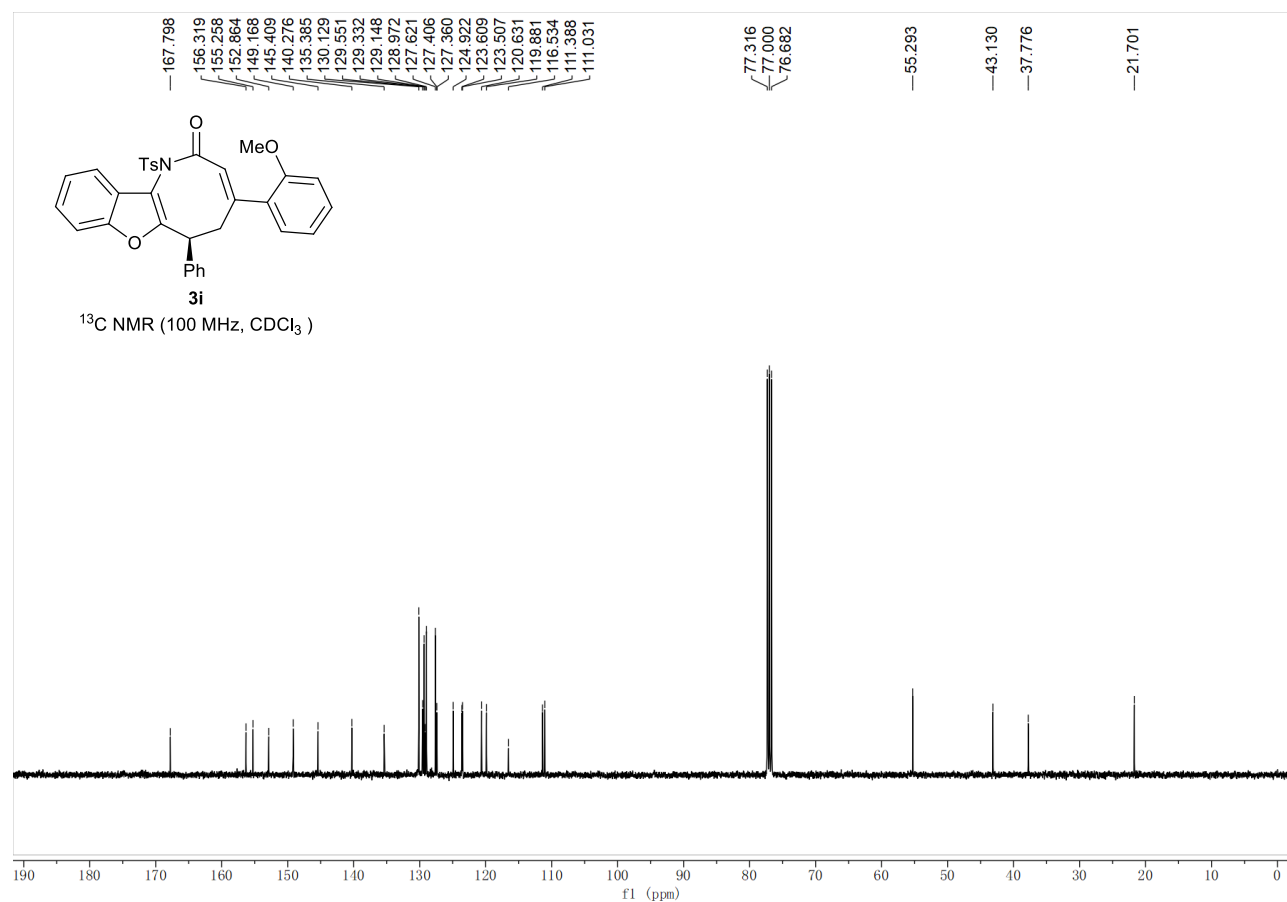

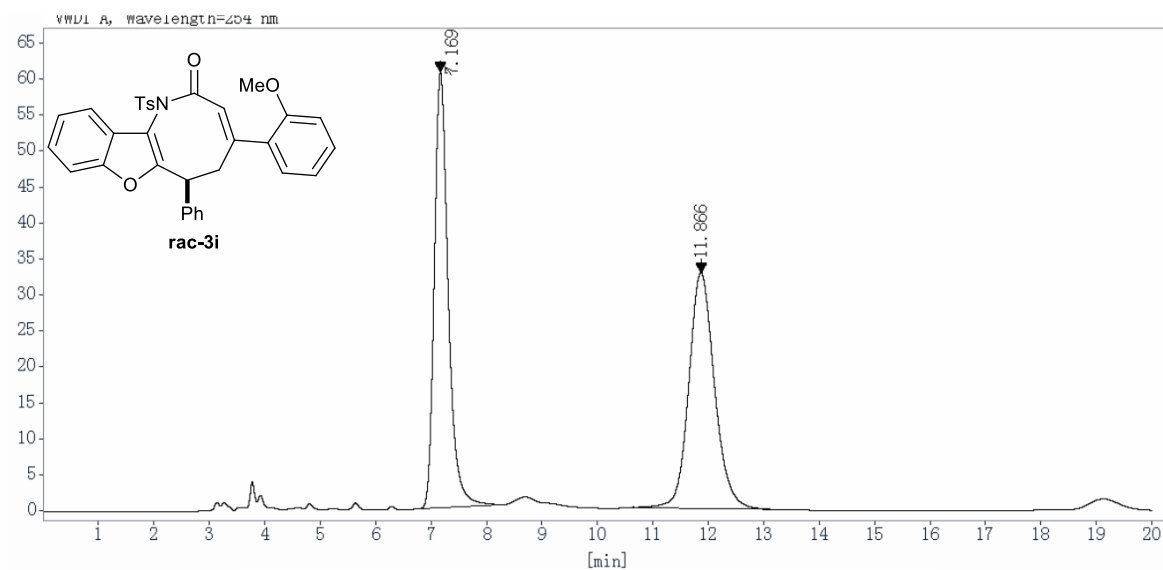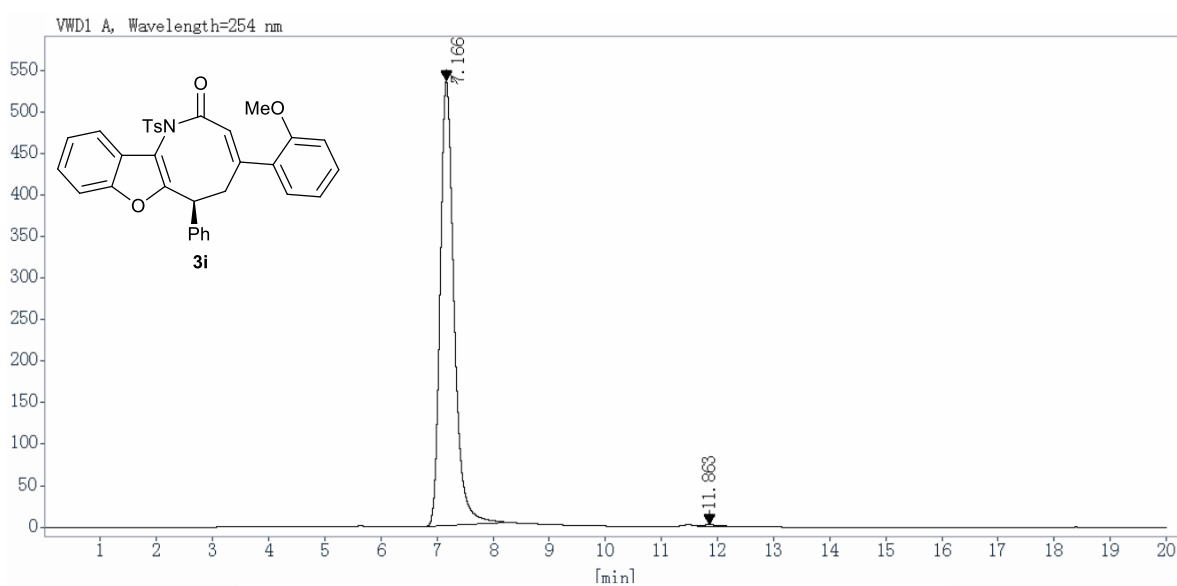

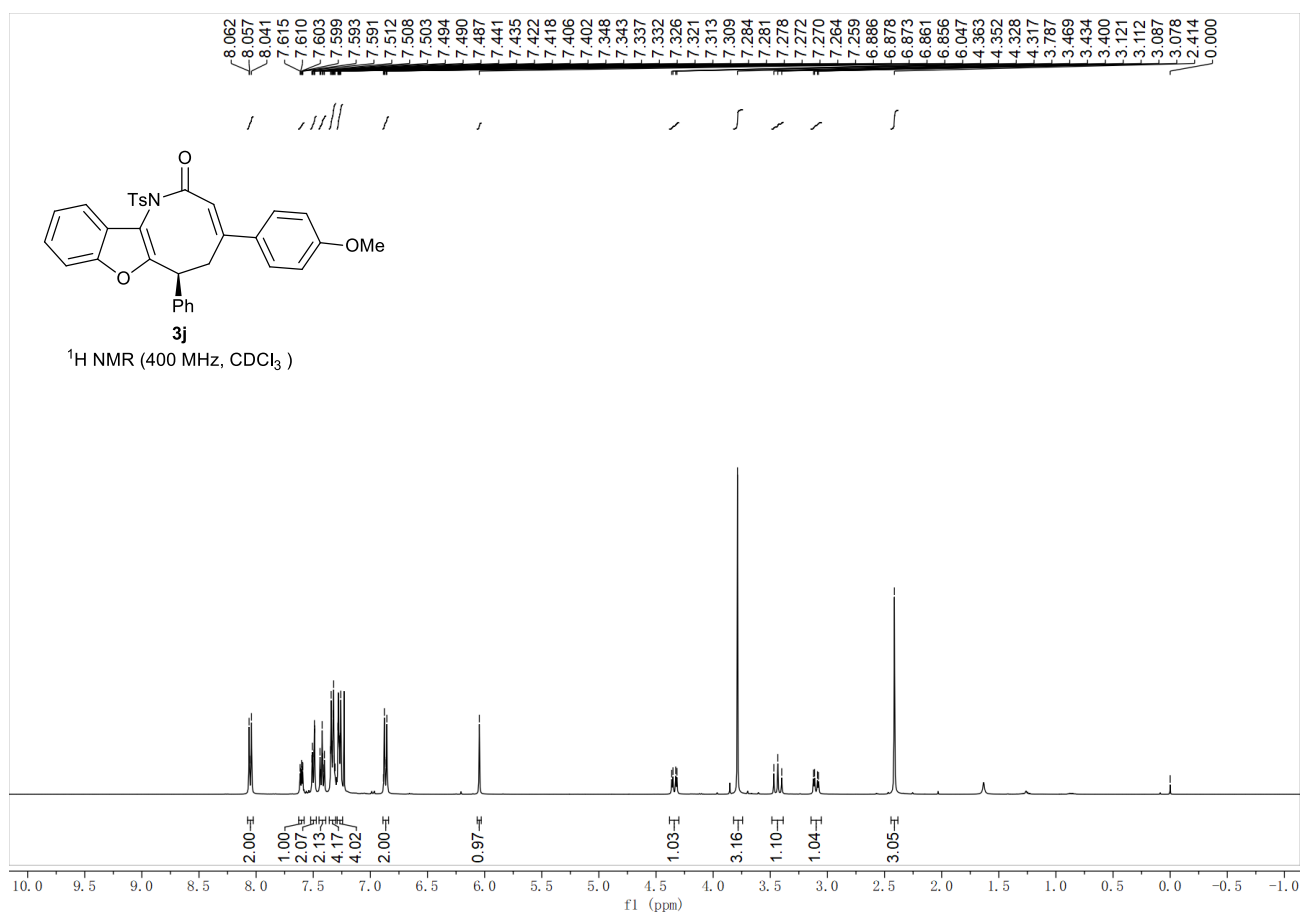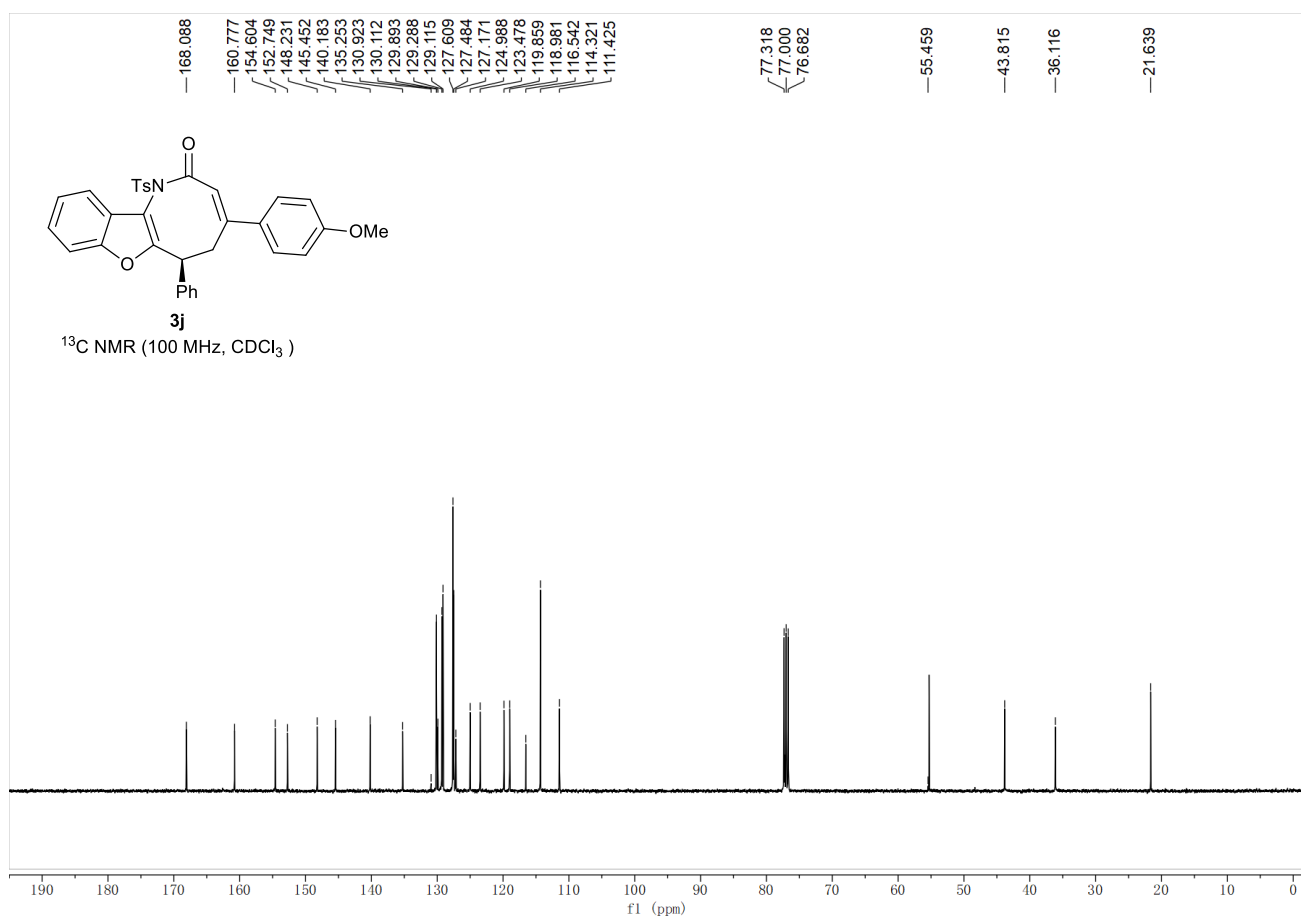

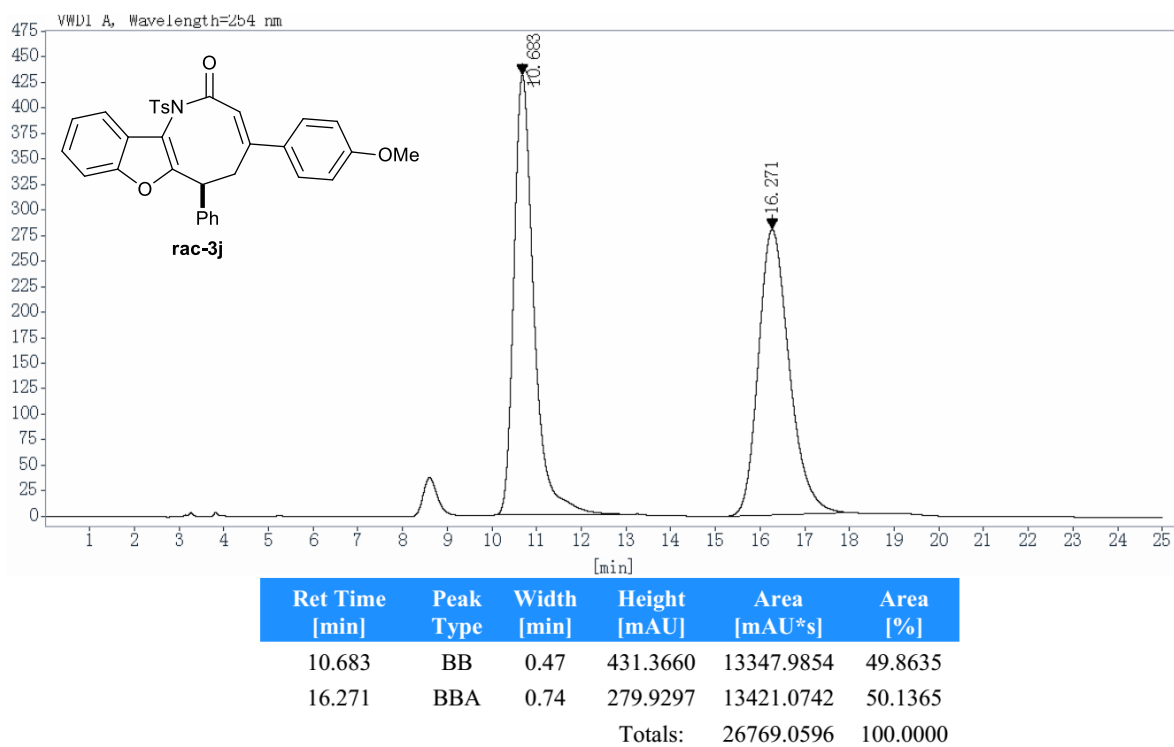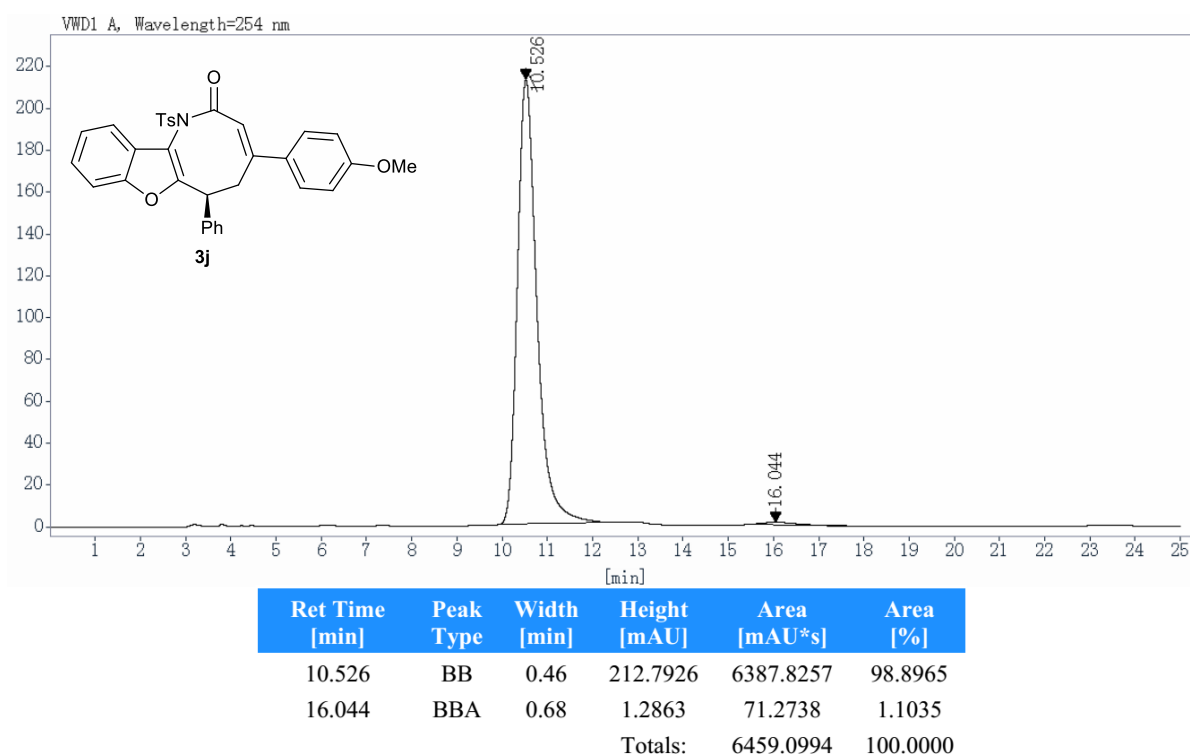

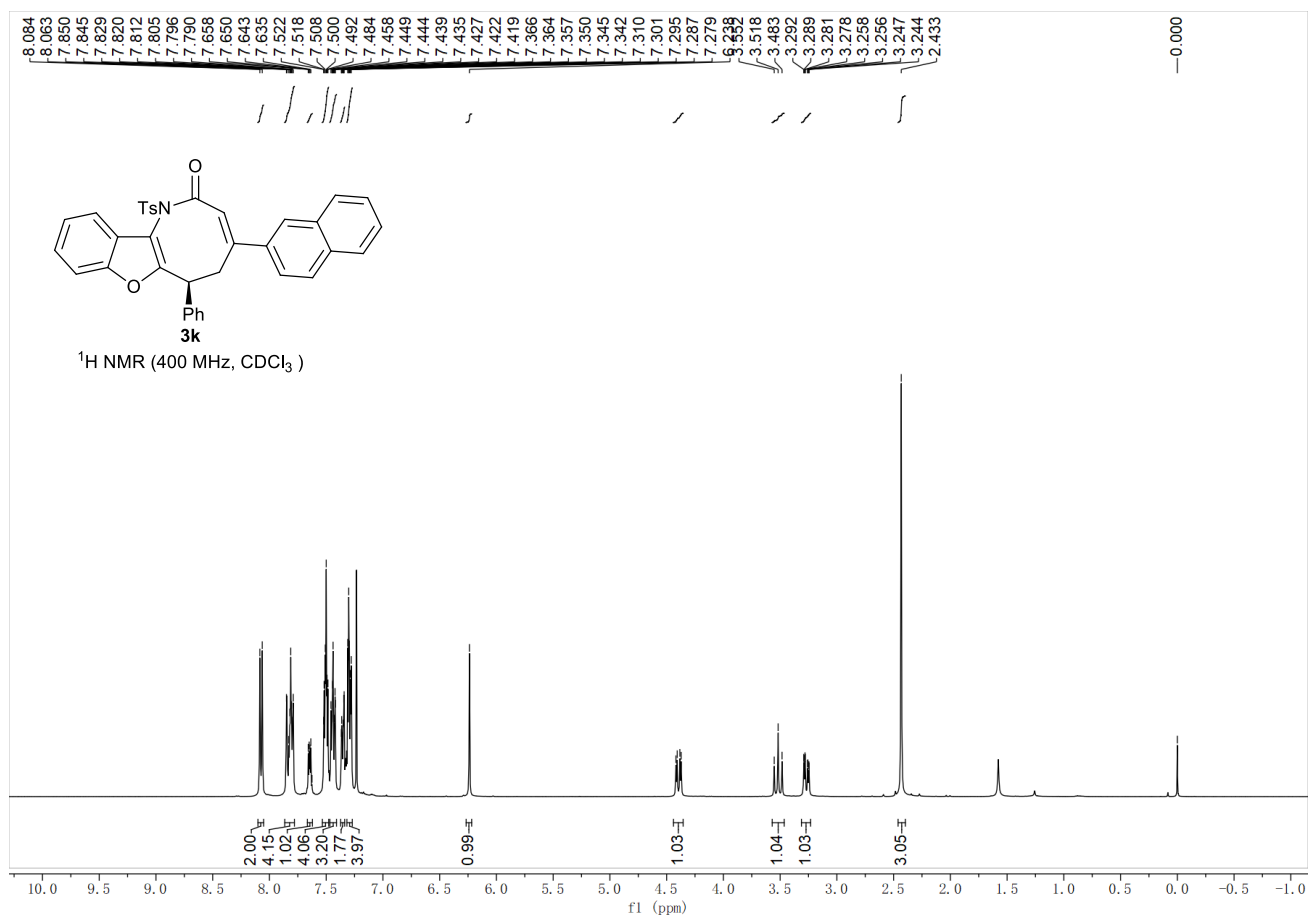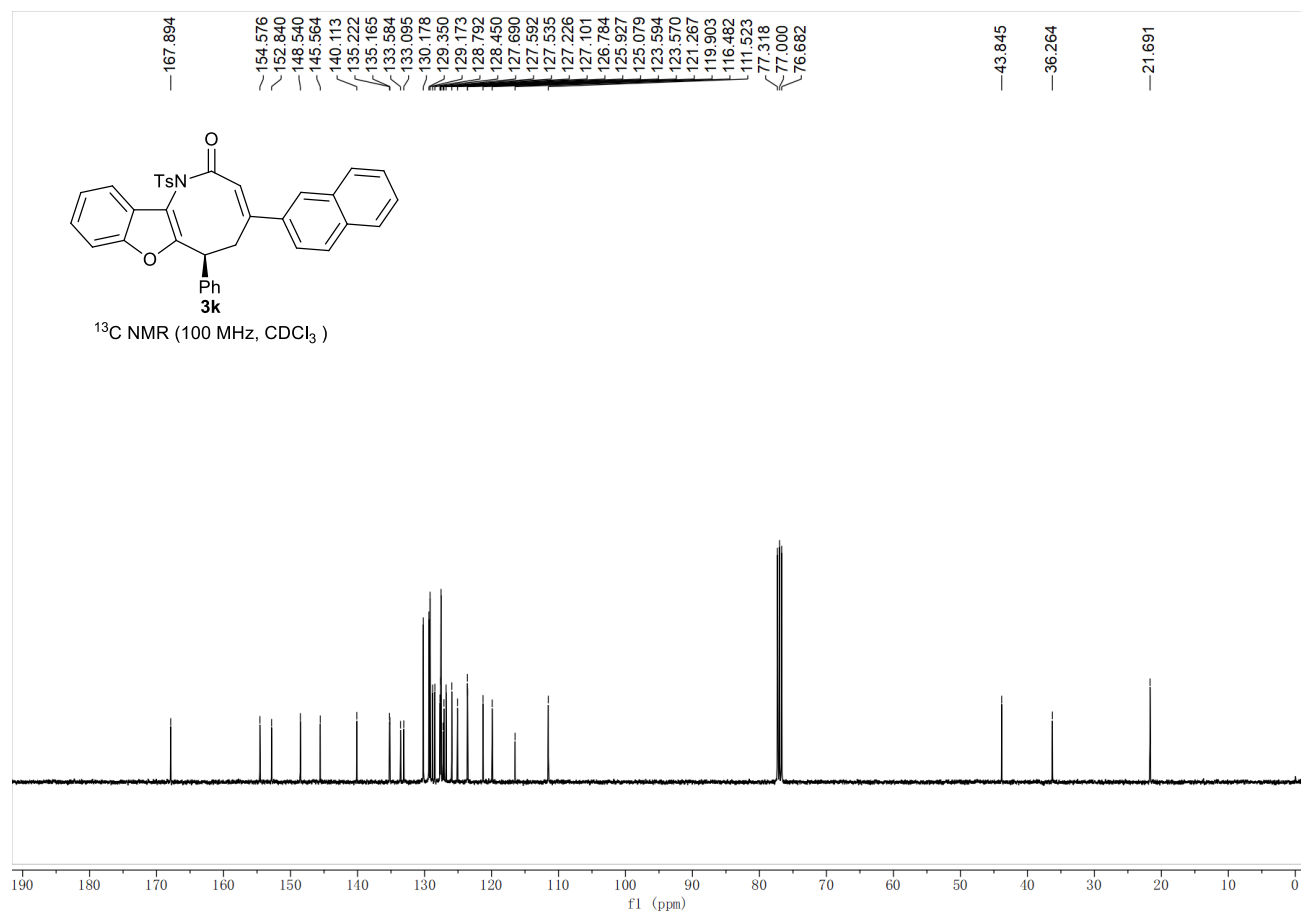

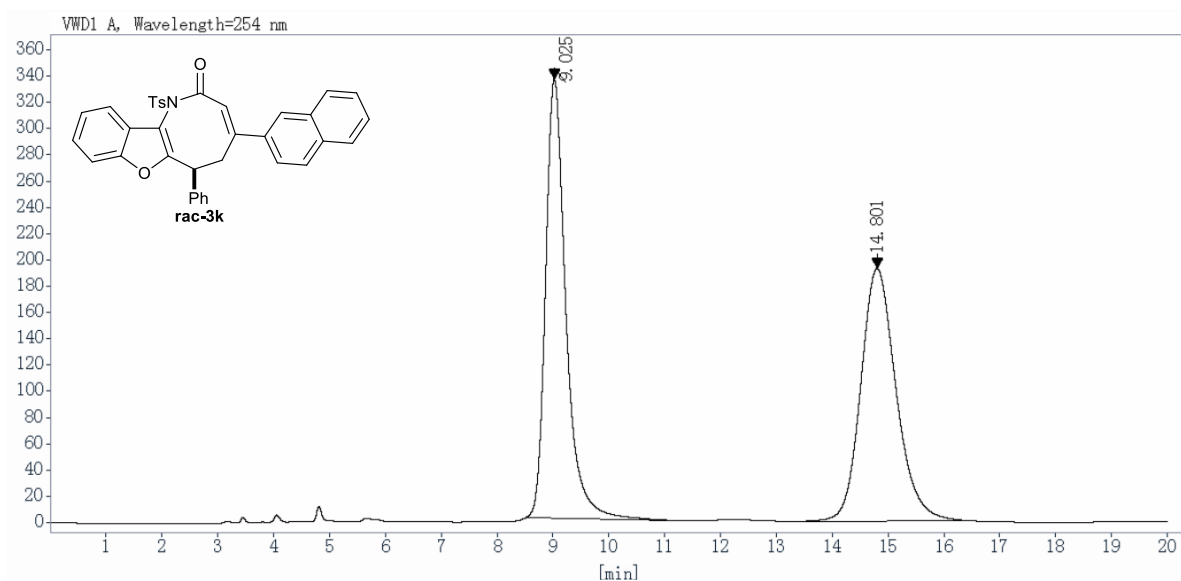

| Ret Time<br>[min] | Peak<br>Type | Width<br>[min] | Height<br>[mAU] | Area<br>[mAU*s] | Area<br>[%] |
|-------------------|--------------|----------------|-----------------|-----------------|-------------|
| 9.025             | BBA          | 0.38           | 334.3492        | 8416.6875       | 49.8715     |
| 14.801            | BBA          | 0.67           | 192.3931        | 8460.0586       | 50.1285     |
| Totals:           |              |                |                 | 16876.7461      | 100.0000    |

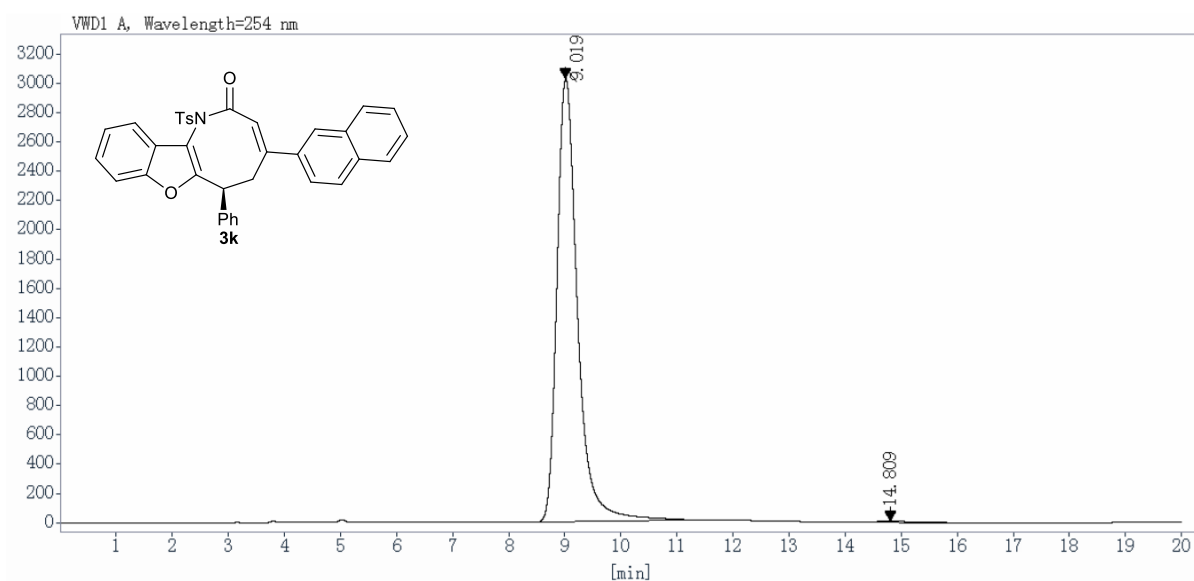

| Ret Time<br>[min] | Peak<br>Type | Width<br>[min] | Height<br>[mAU] | Area<br>[mAU*s] | Area<br>[%] |
|-------------------|--------------|----------------|-----------------|-----------------|-------------|
| 9.019             | BBA          | 0.39           | 3027.6592       | 76755.3828      | 99.5534     |
| 14.809            | BBA          | 0.65           | 8.0464          | 344.3551        | 0.4466      |
| Totals:           |              |                |                 | 77099.7379      | 100.0000    |

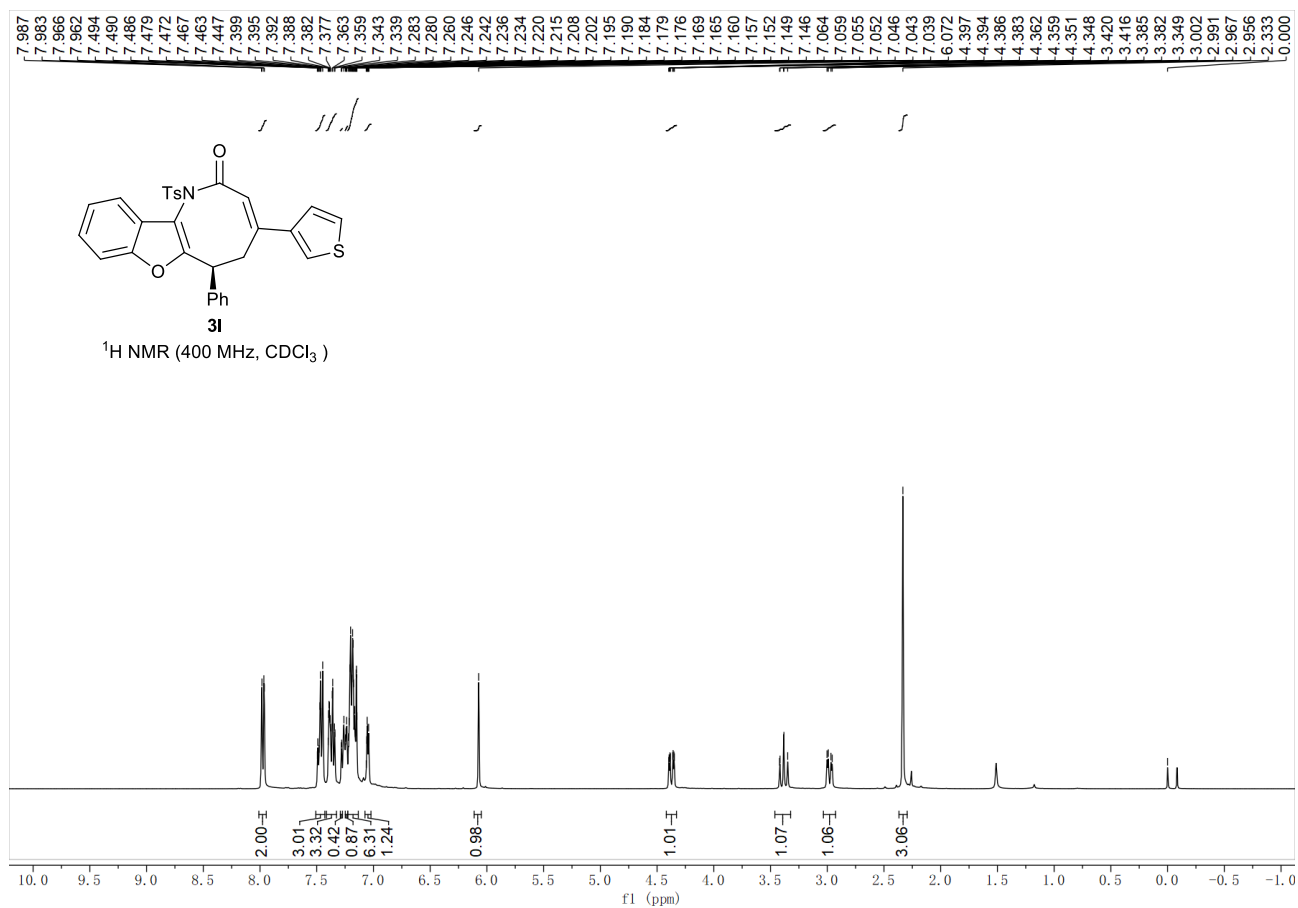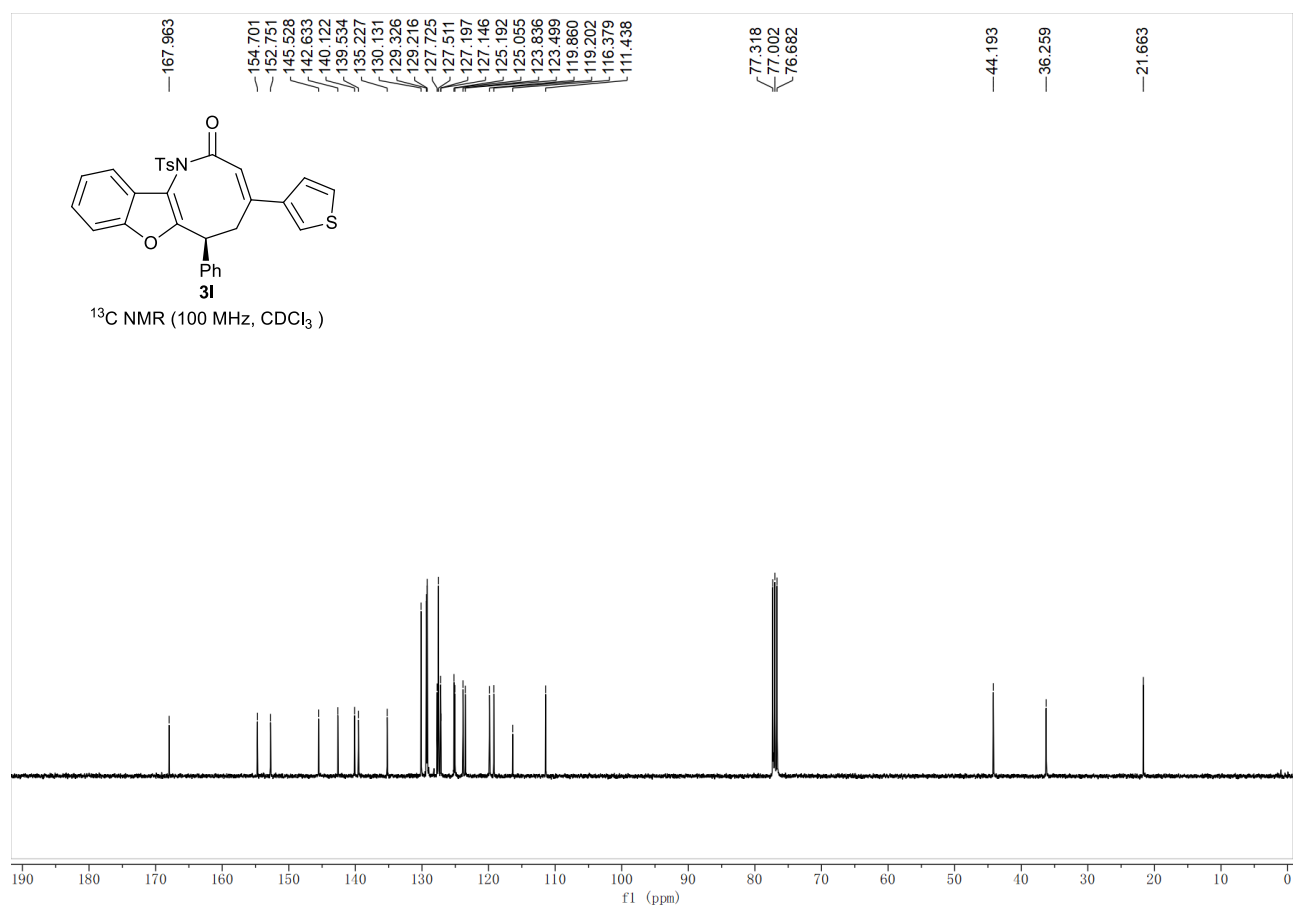

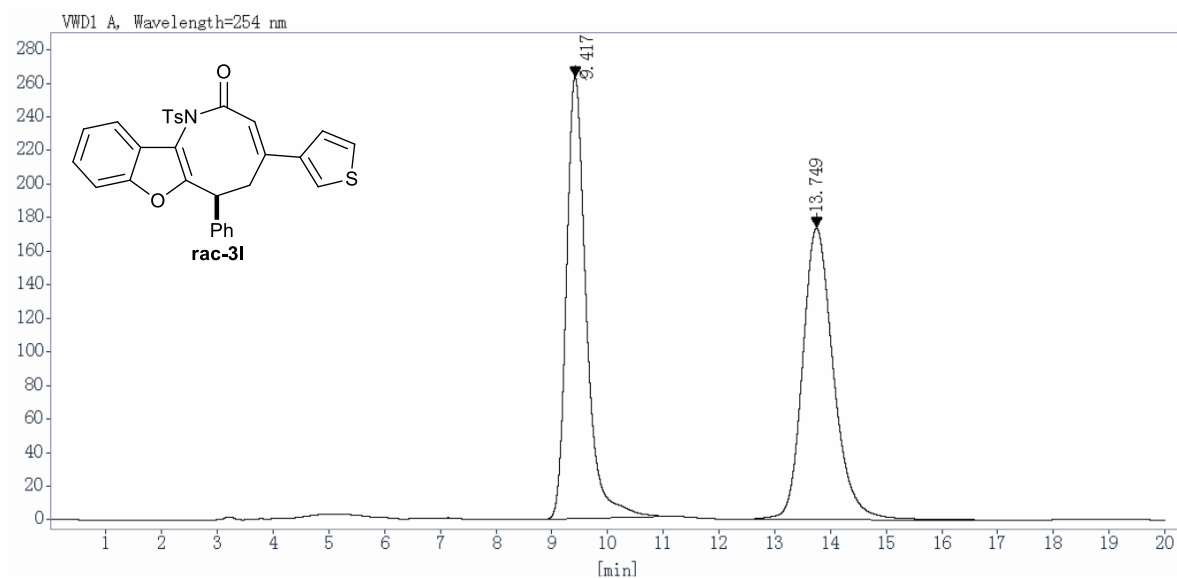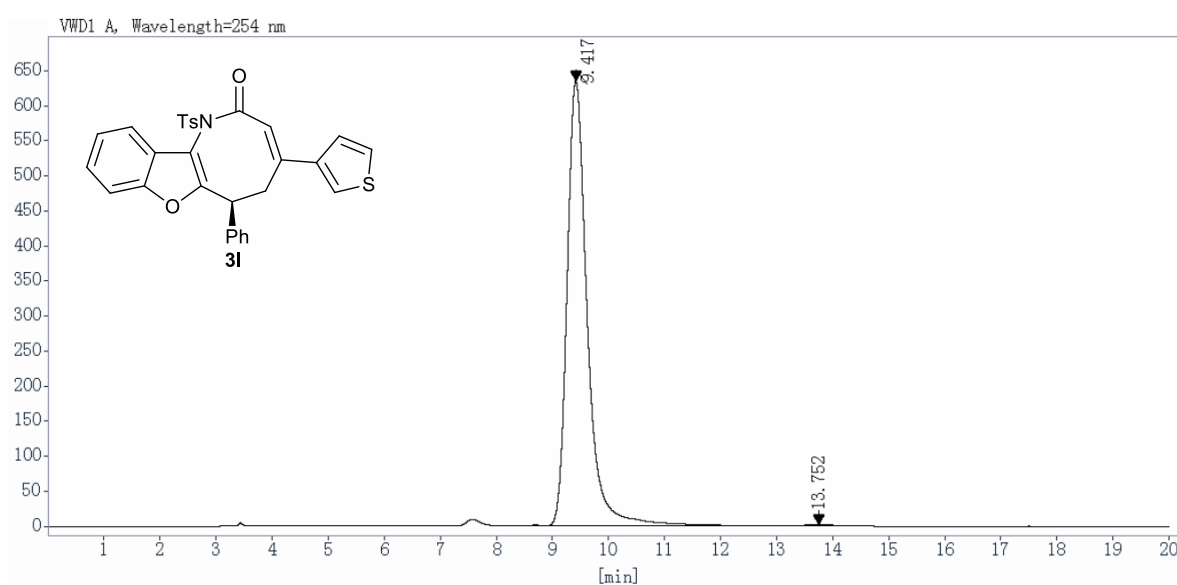



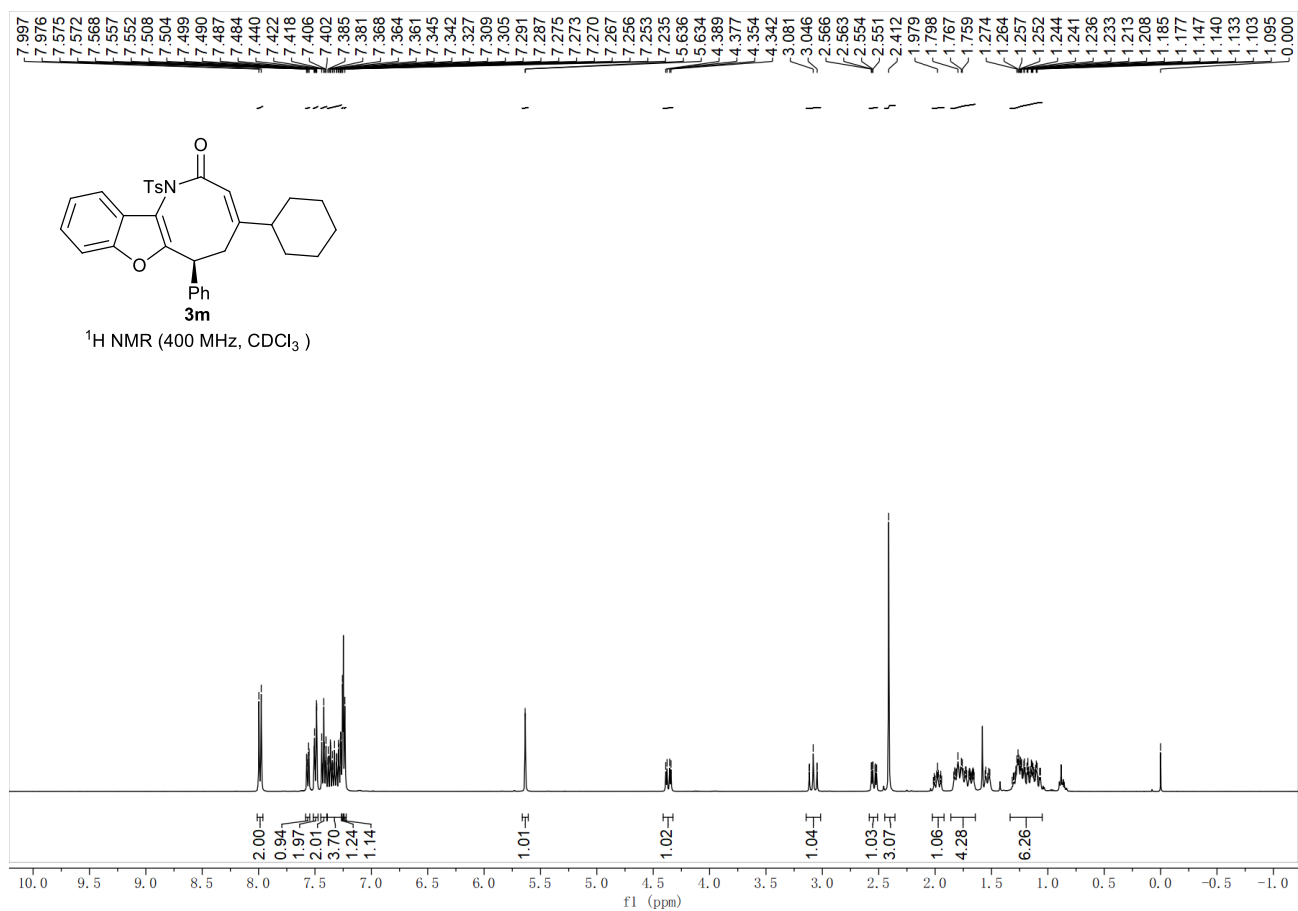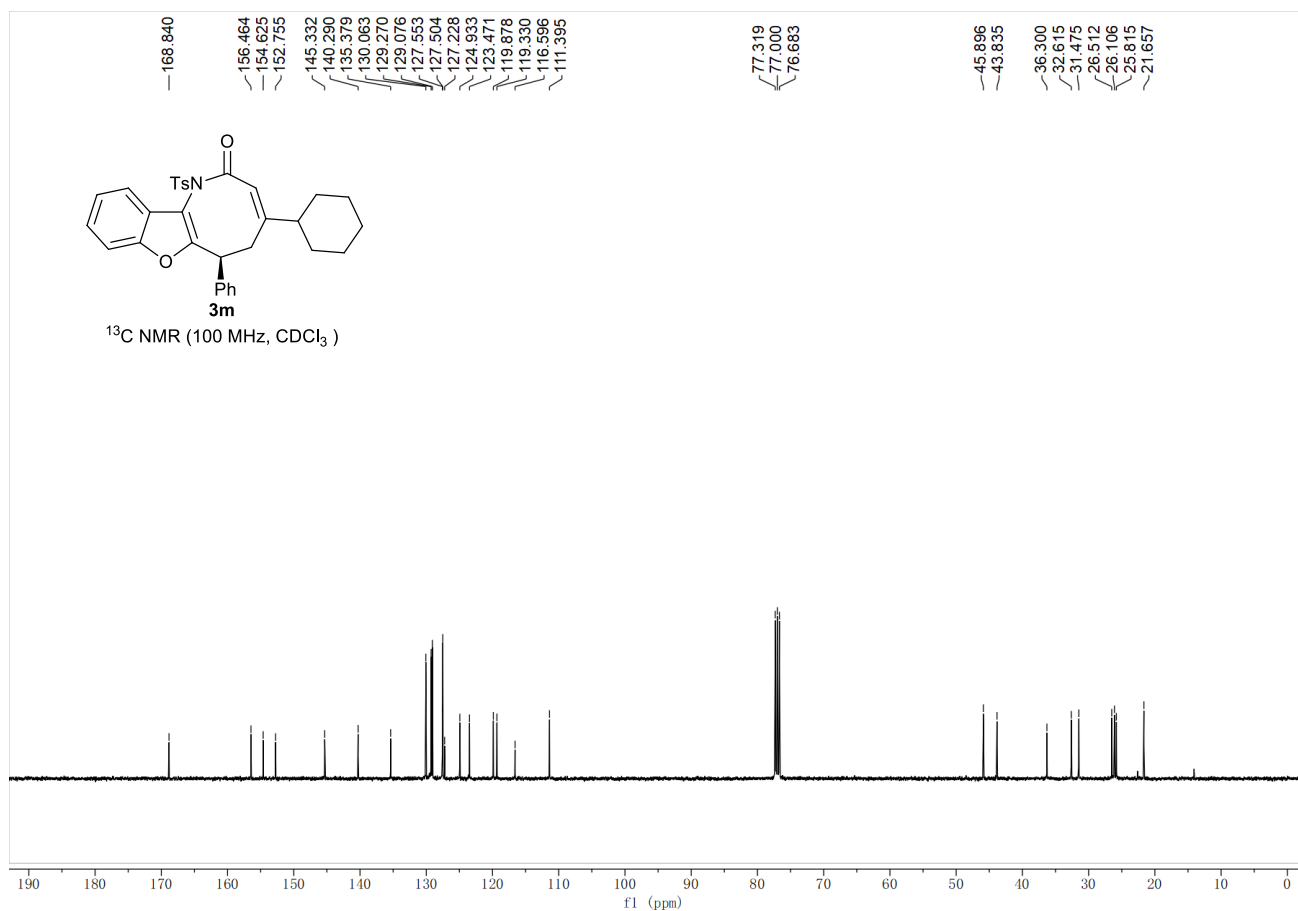

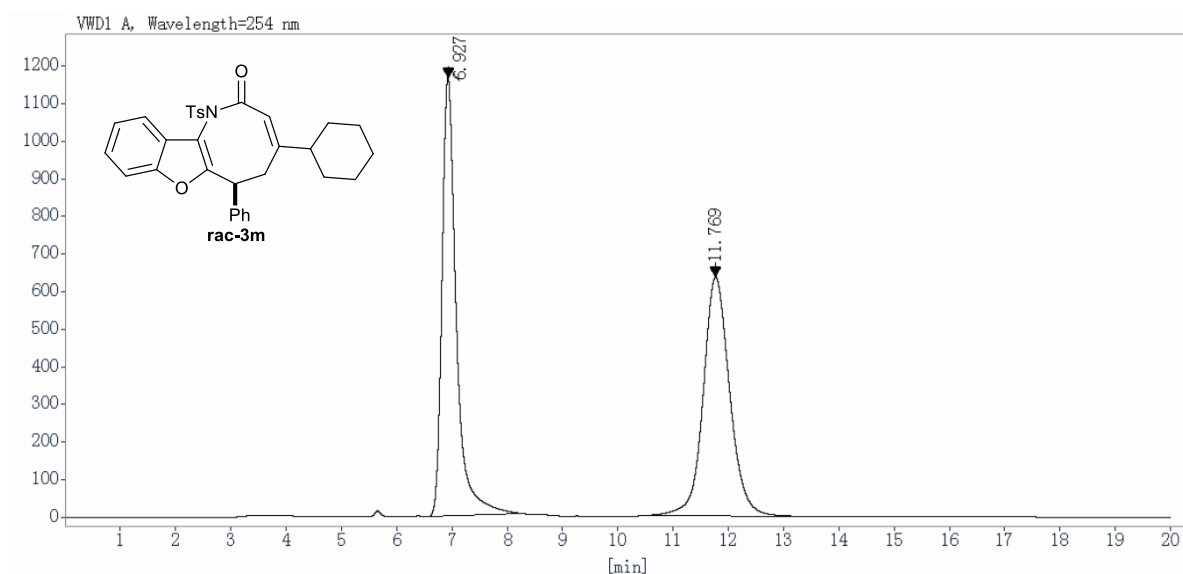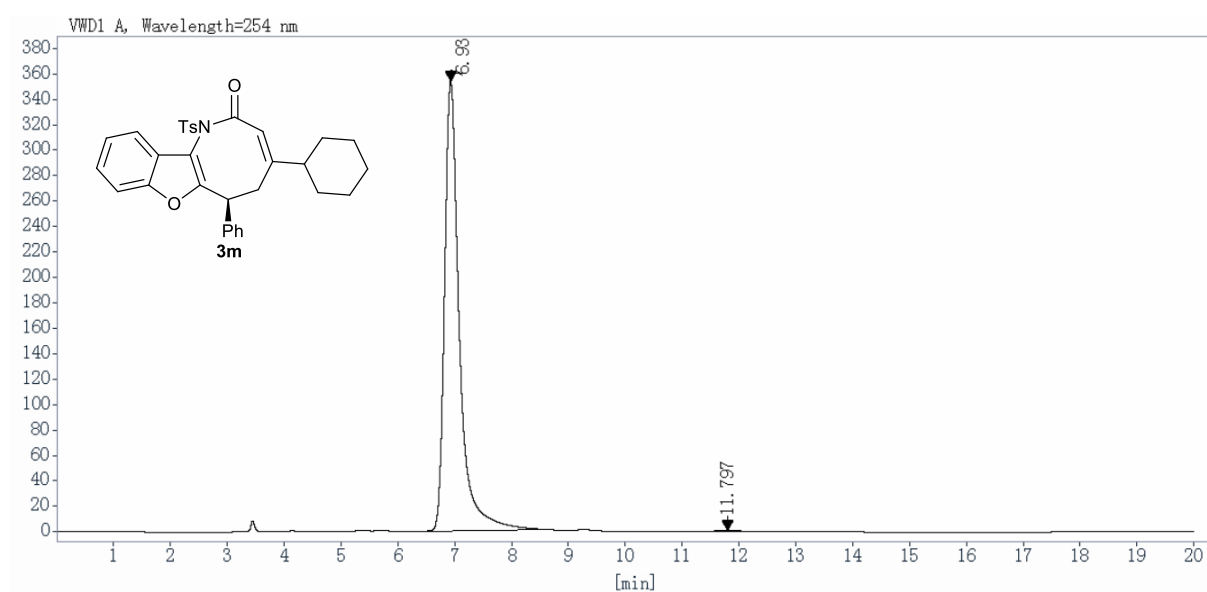

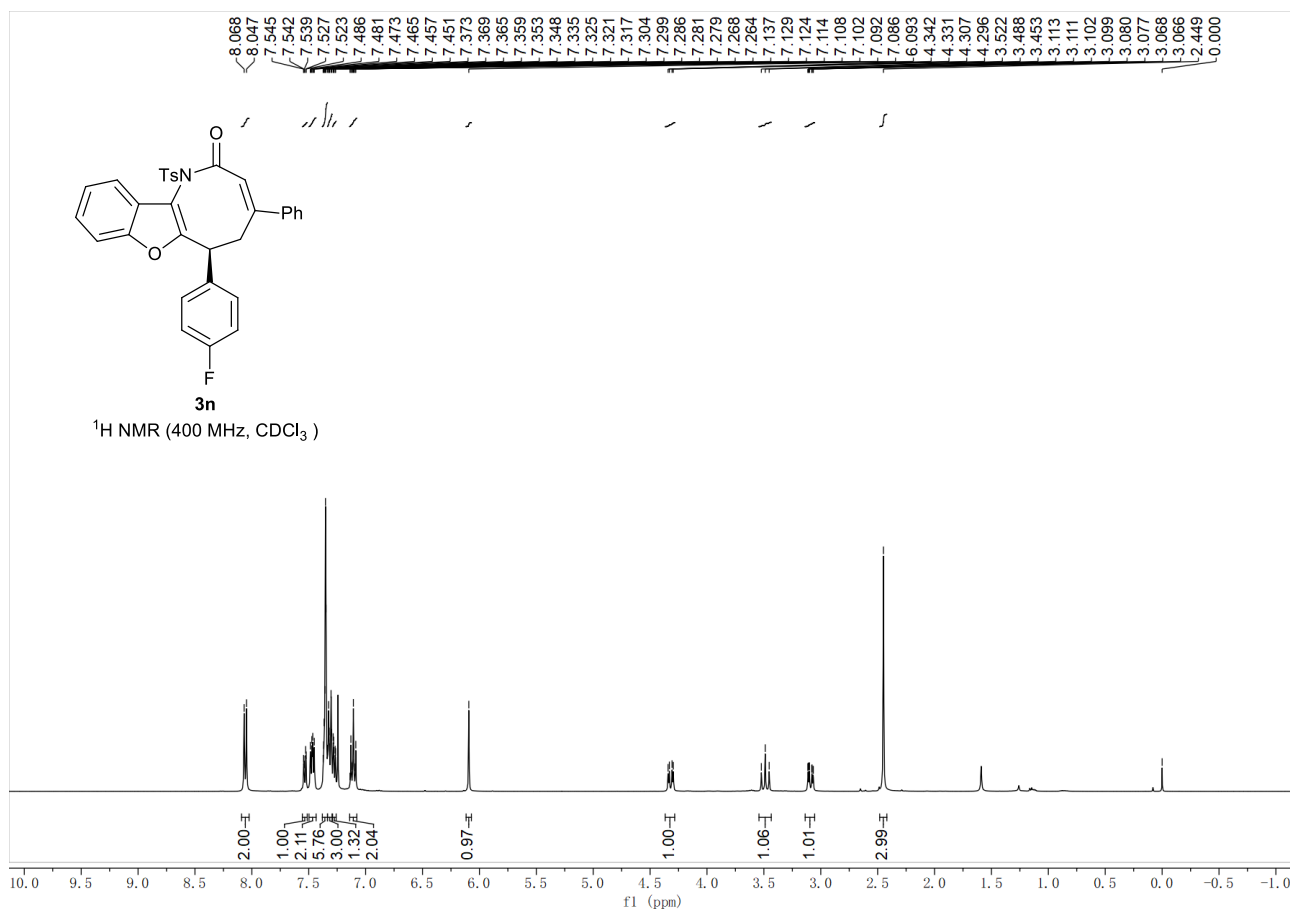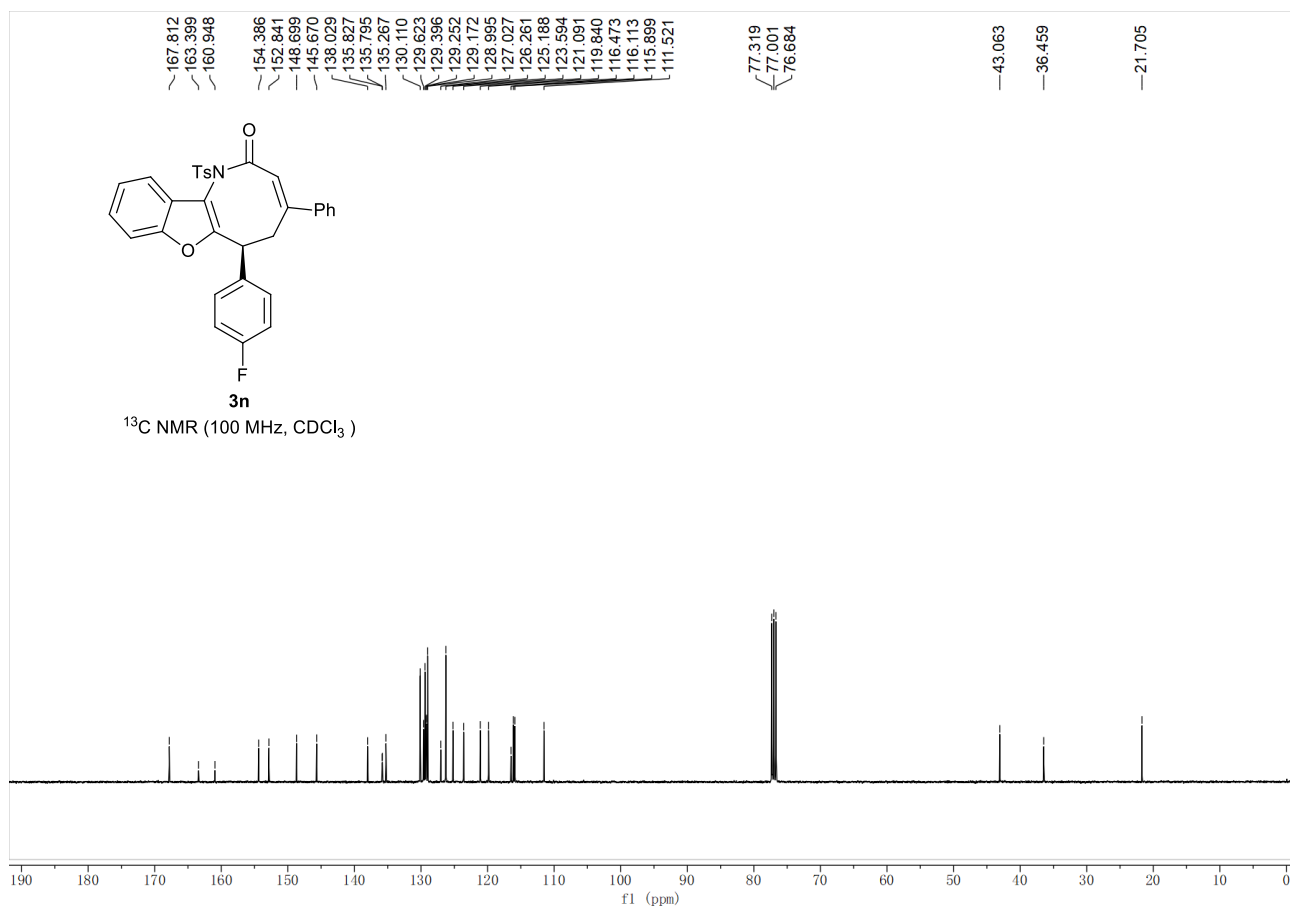

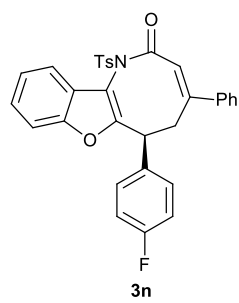

$^{19}\text{F}$  NMR (376 MHz,  $\text{CDCl}_3$ )

—114.572

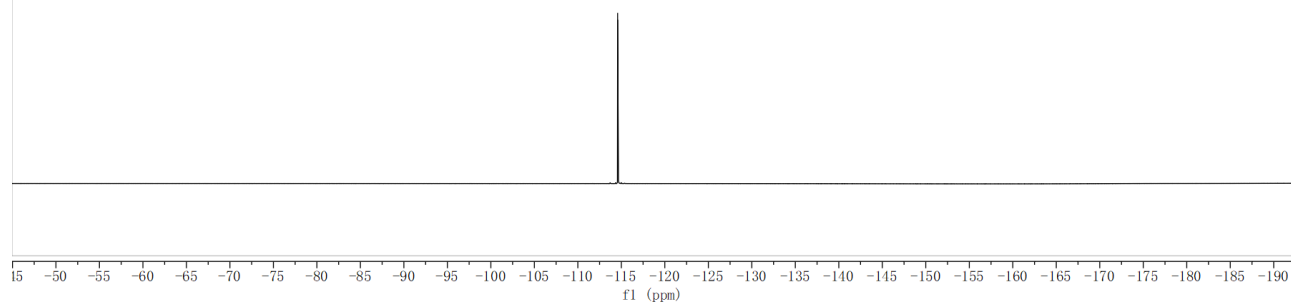

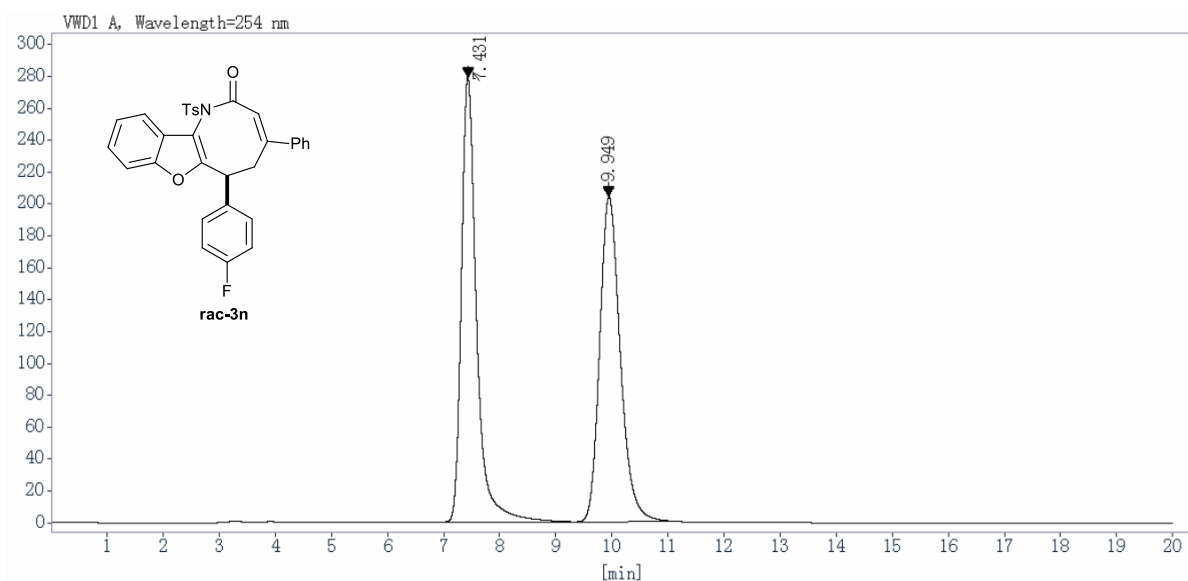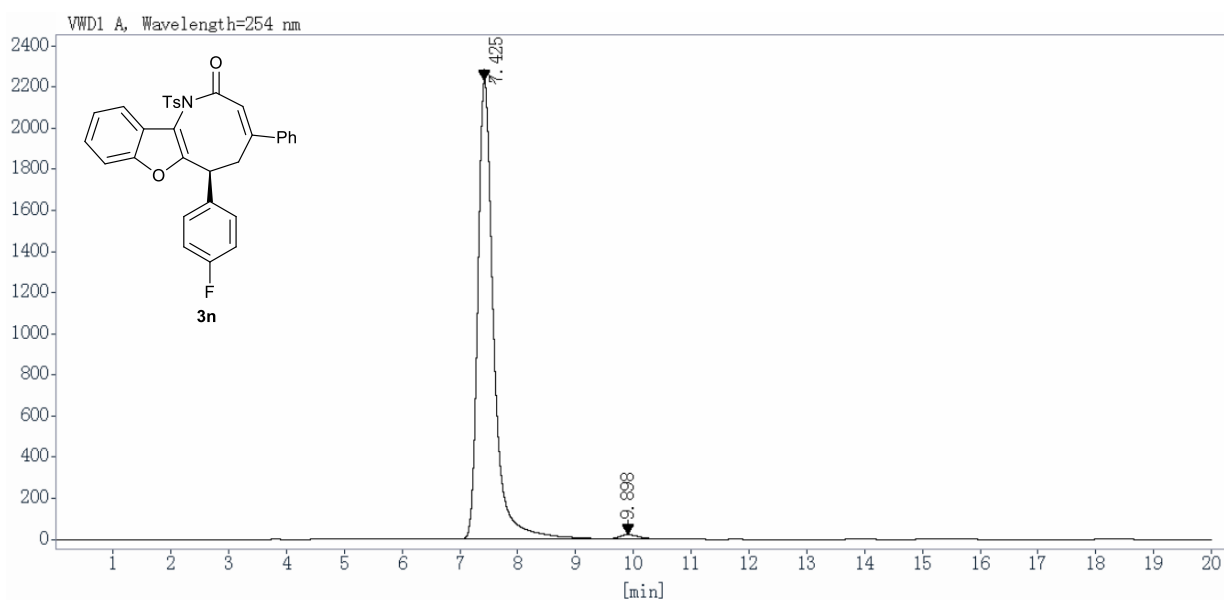

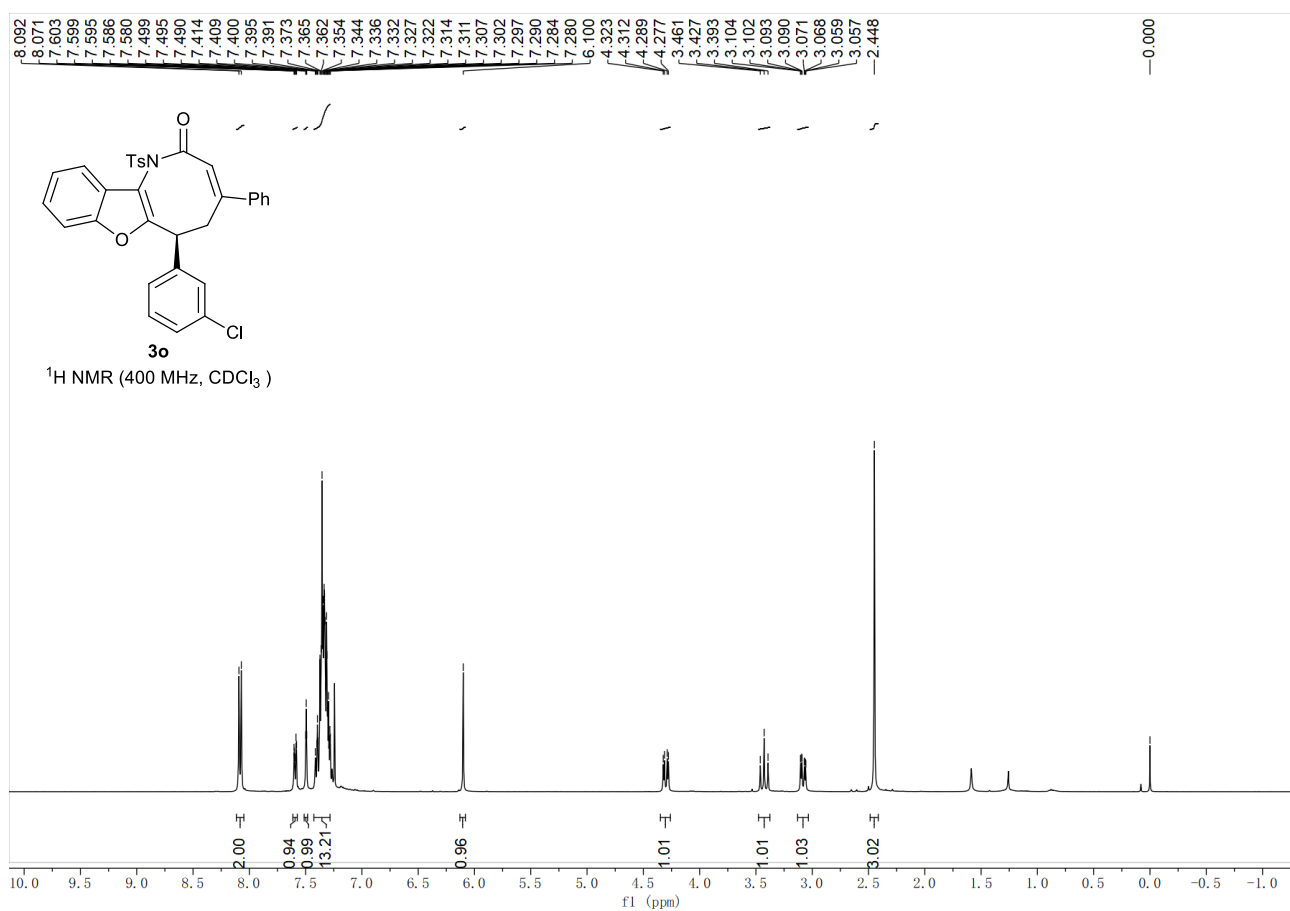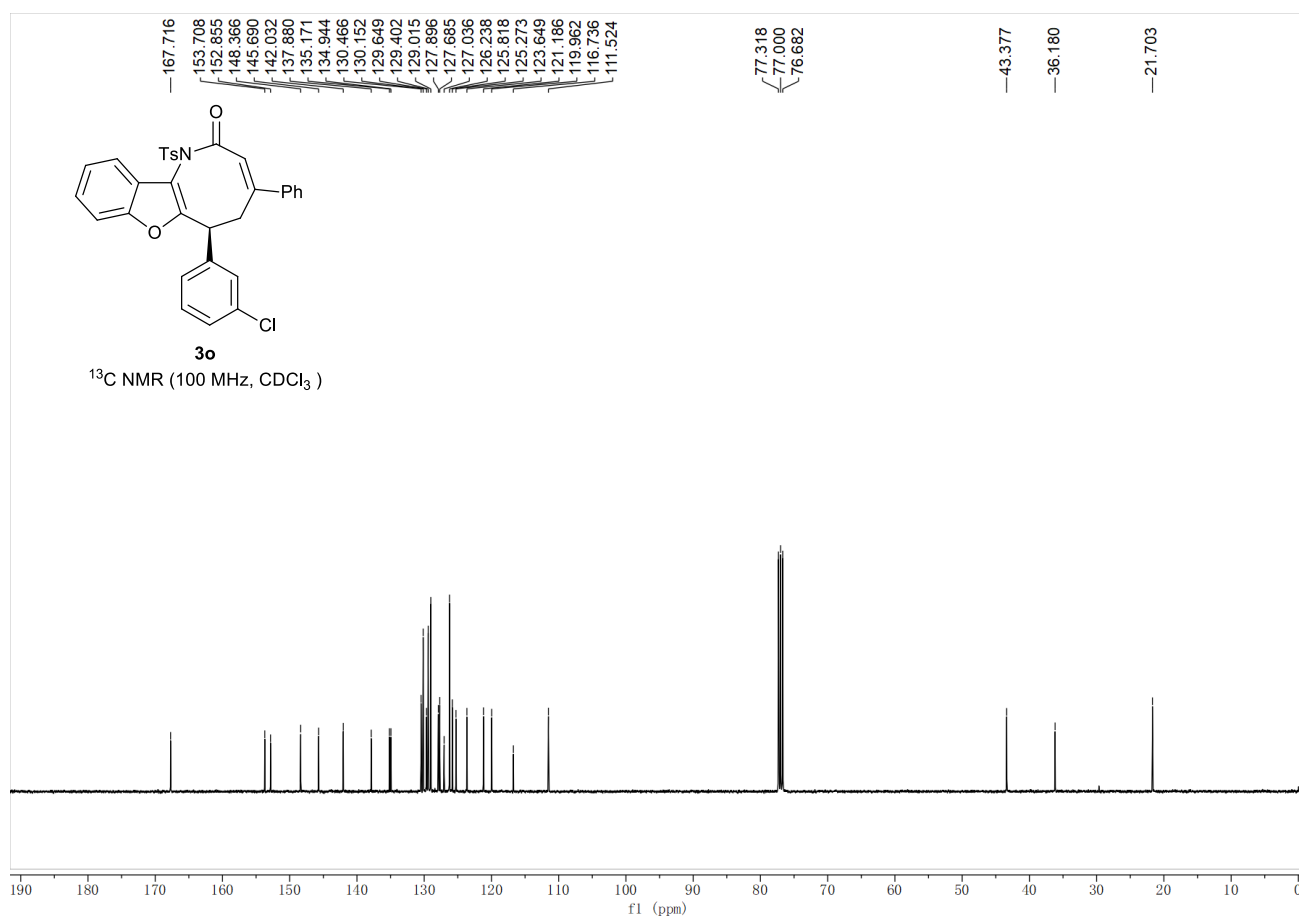

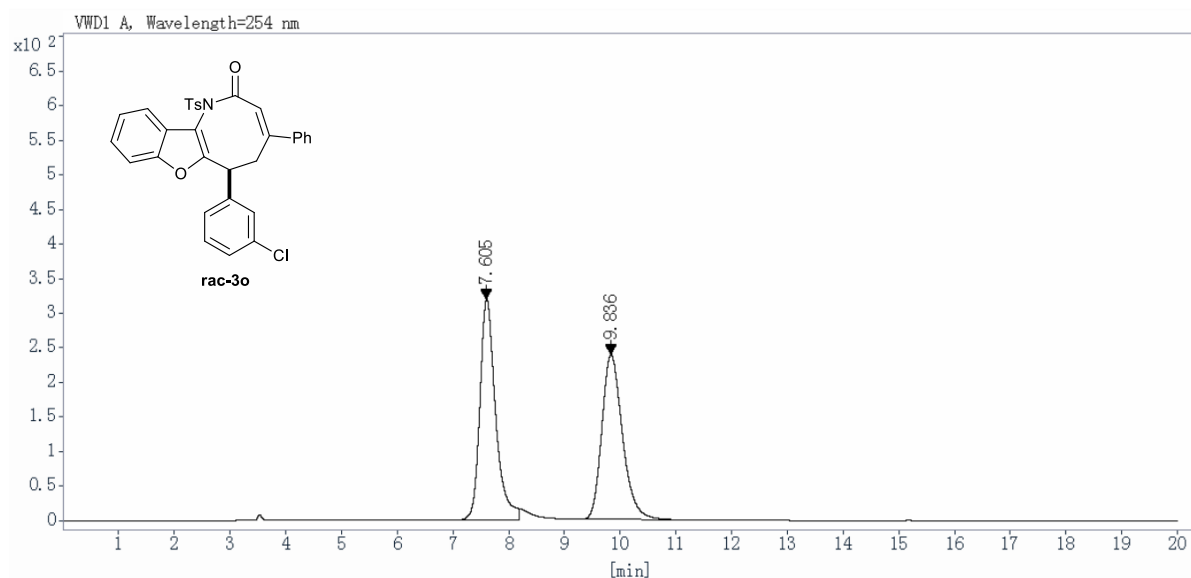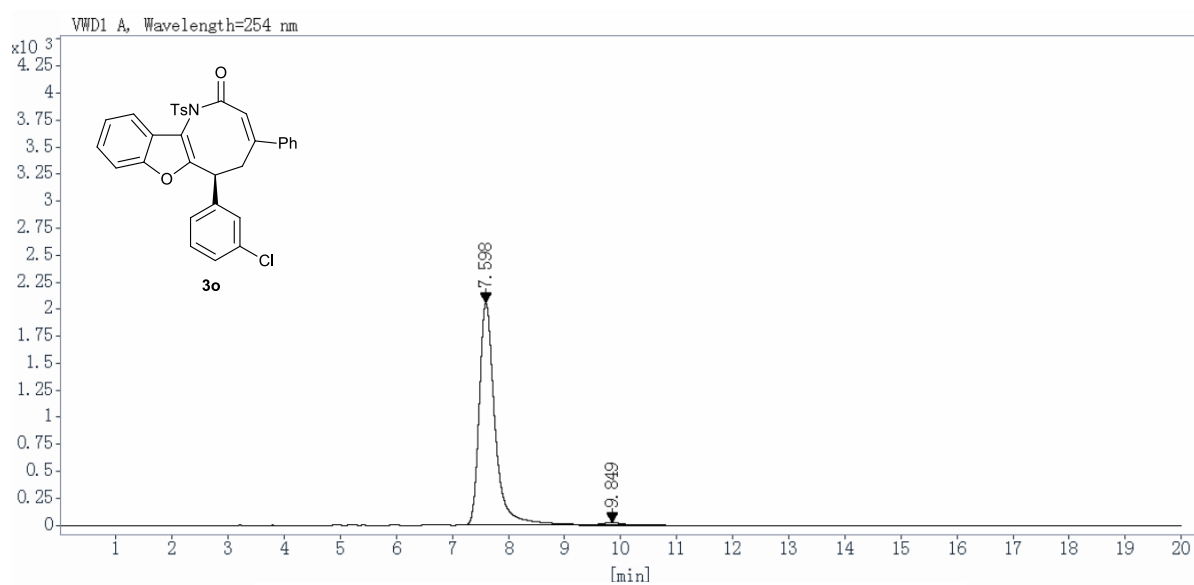

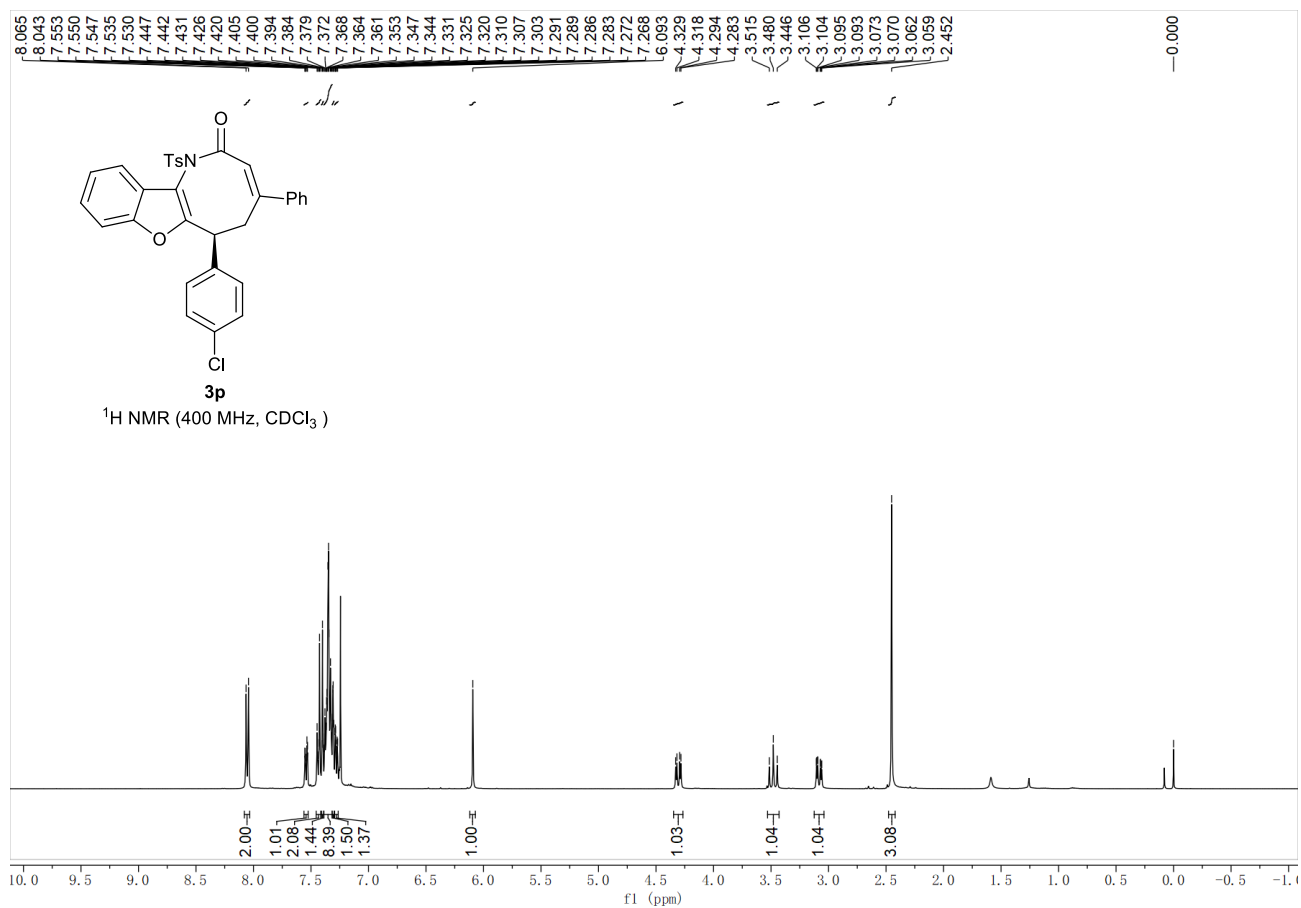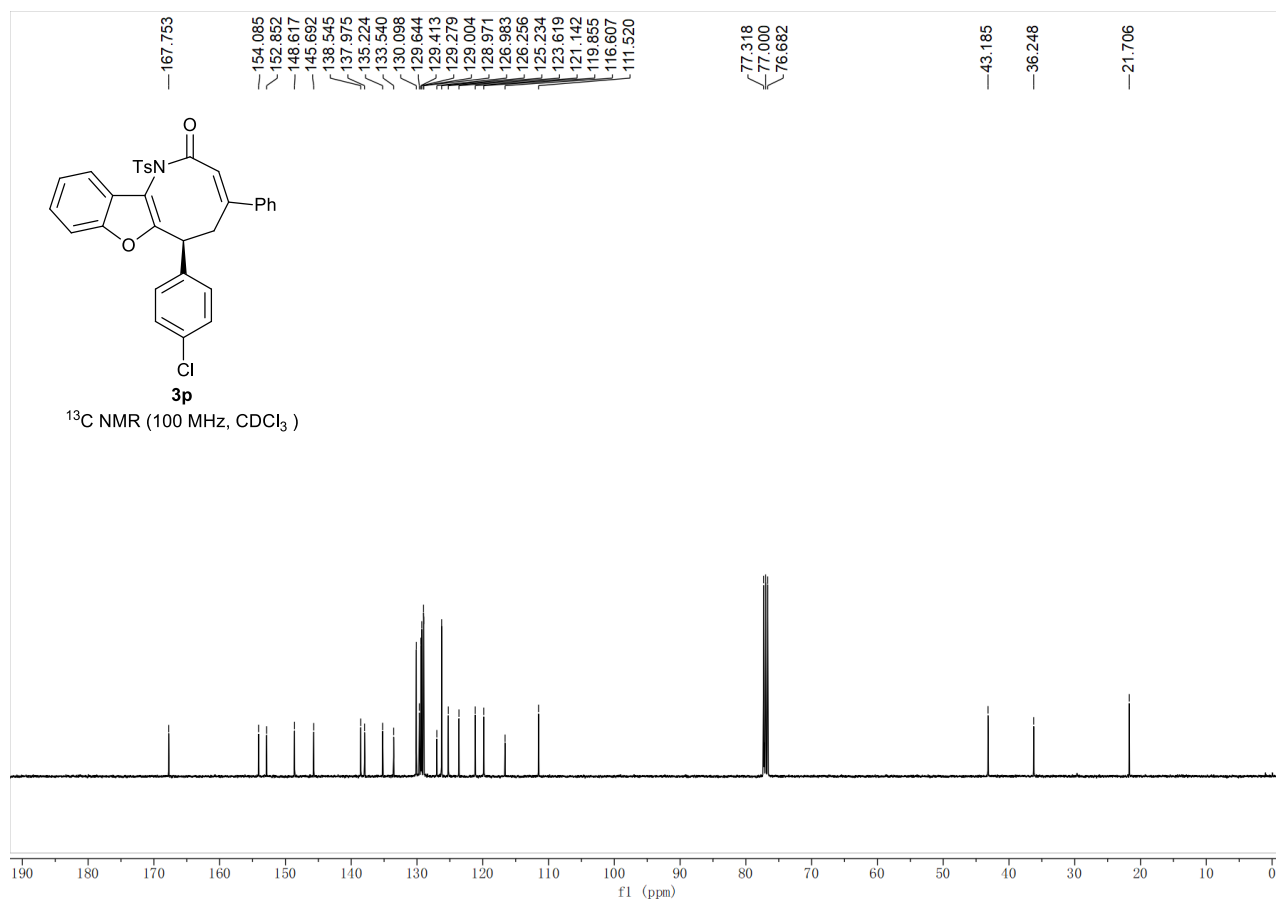



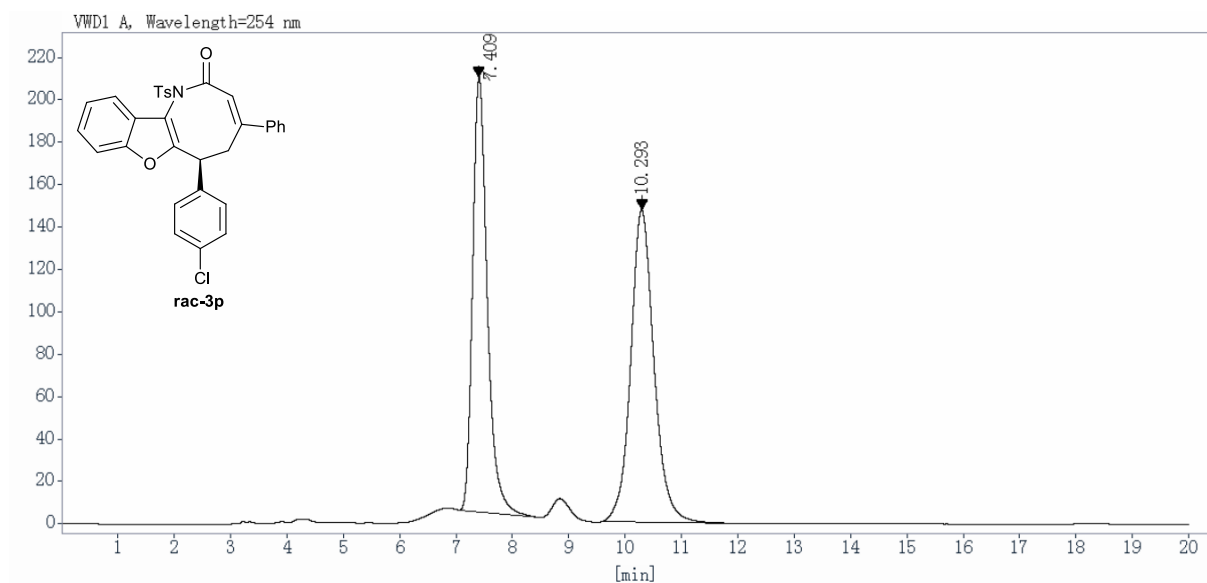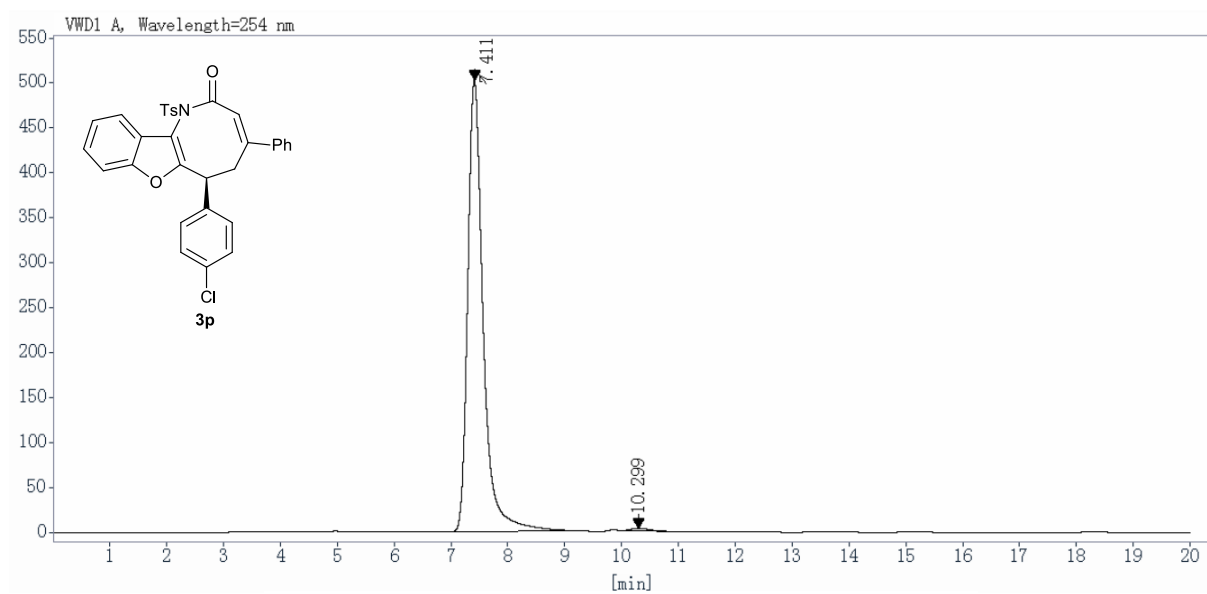

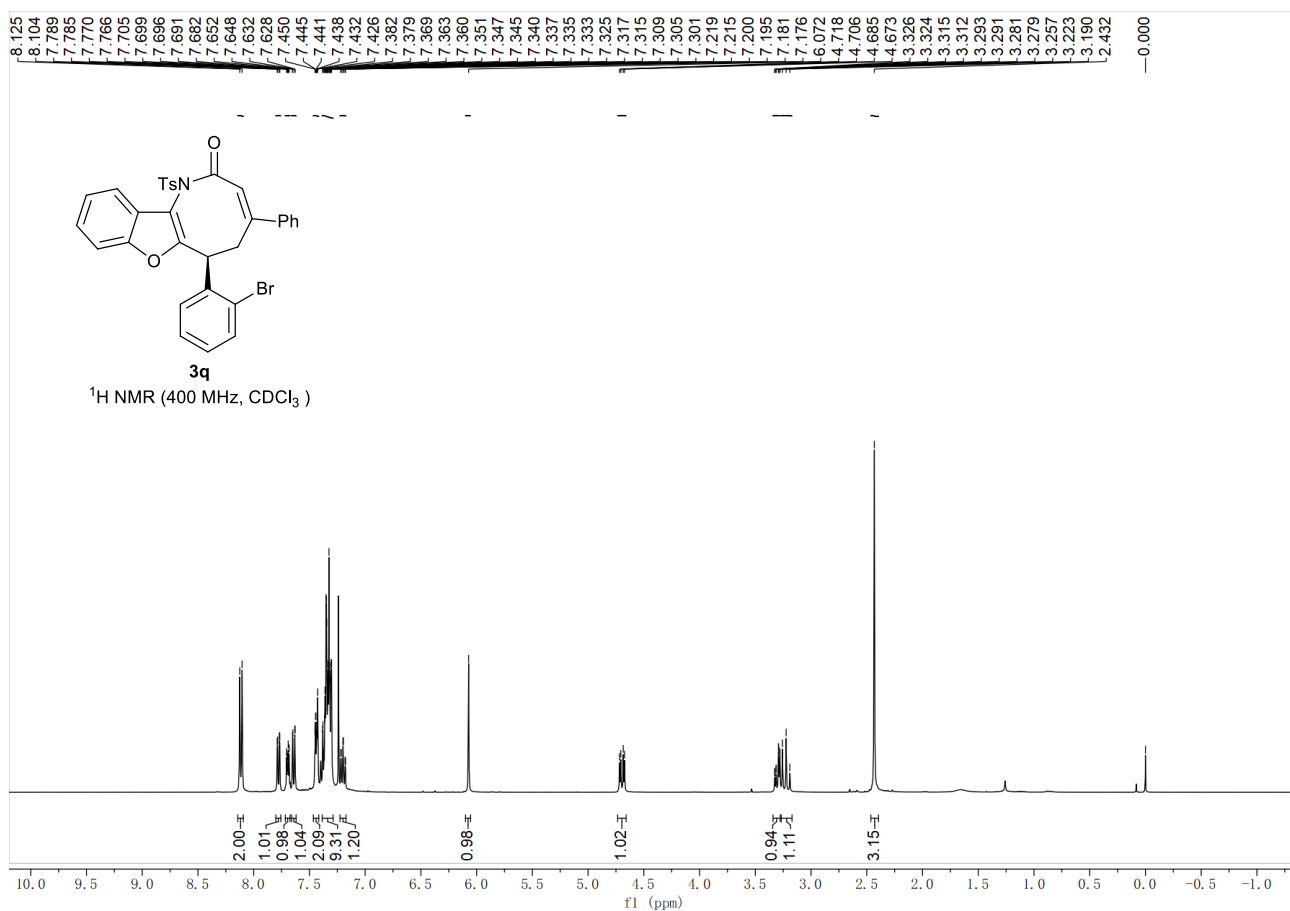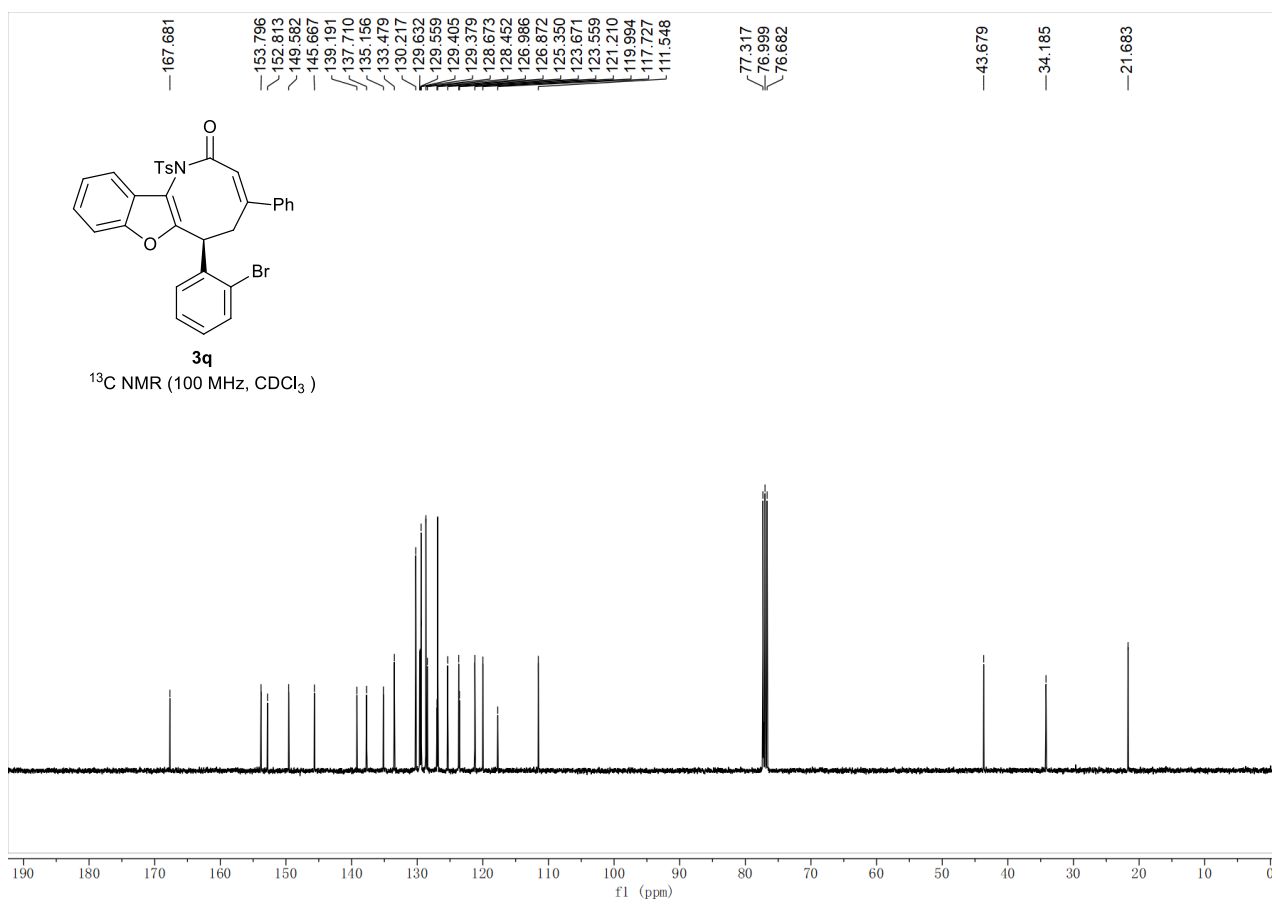

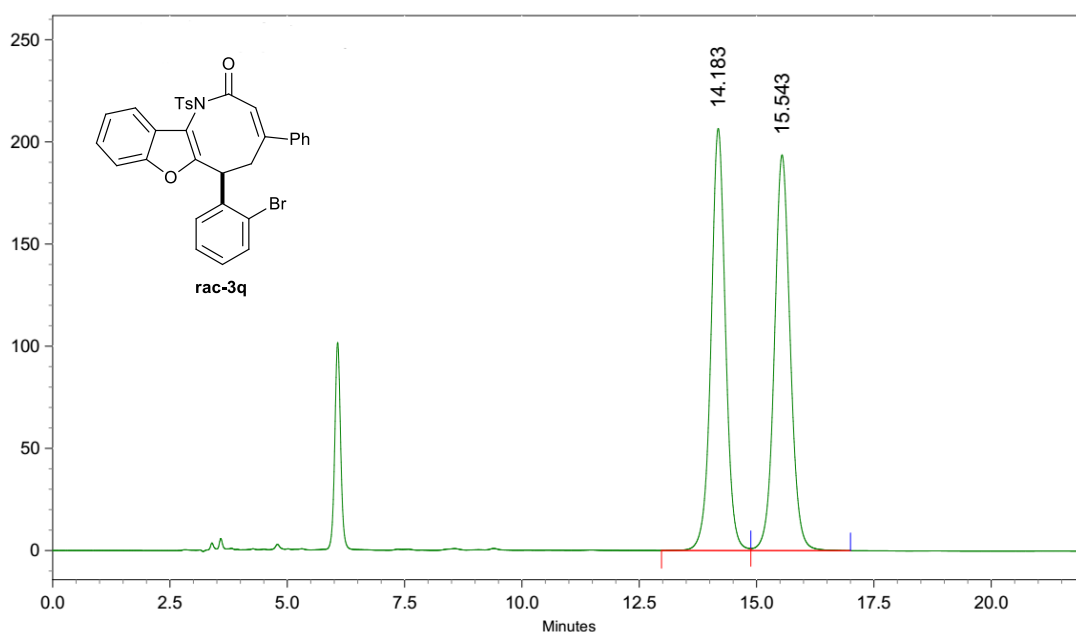

| Peak No. | Ret Time | Width | Height  | Area     | Area [%] |
|----------|----------|-------|---------|----------|----------|
| 1        | 14.183   | 1.903 | 3467009 | 74044143 | 49.2823  |
| 2        | 15.543   | 2.123 | 3249764 | 76200725 | 50.7177  |

|        |  |  |         |           |          |
|--------|--|--|---------|-----------|----------|
| Totals |  |  | 6716773 | 150244868 | 100.0000 |
|--------|--|--|---------|-----------|----------|

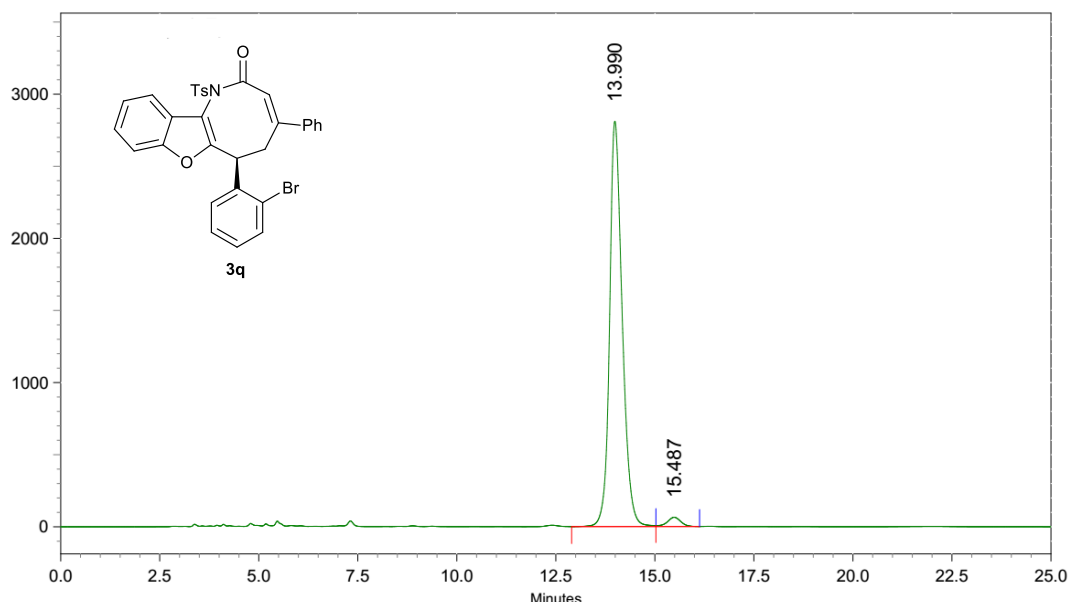

| Peak No. | Ret Time | Width | Height   | Area       | Area [%] |
|----------|----------|-------|----------|------------|----------|
| 1        | 13.990   | 2.127 | 47152489 | 1044504402 | 97.6231  |
| 2        | 15.487   | 1.103 | 1075695  | 25431594   | 2.3769   |

|        |  |  |          |            |          |
|--------|--|--|----------|------------|----------|
| Totals |  |  | 48228184 | 1069935996 | 100.0000 |
|--------|--|--|----------|------------|----------|

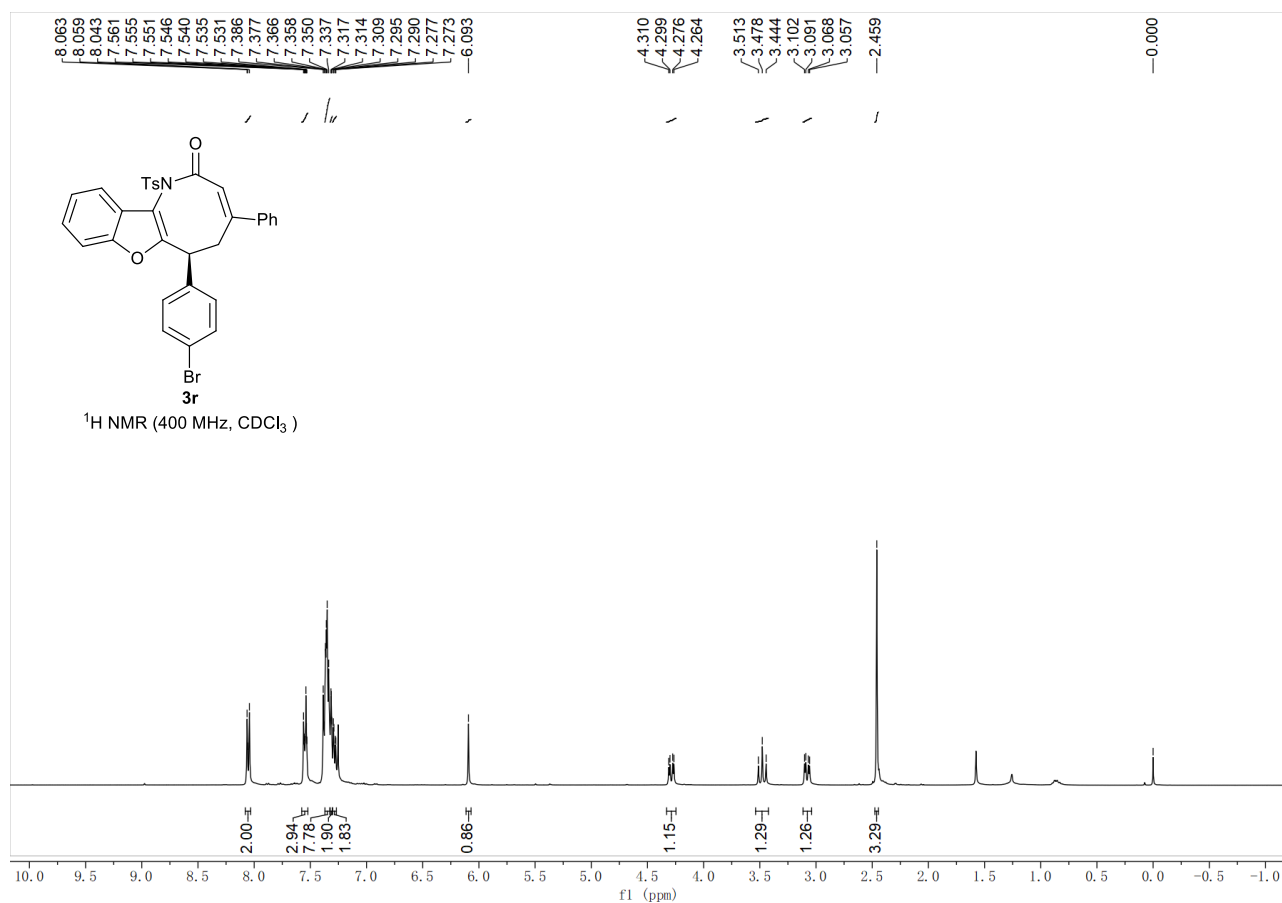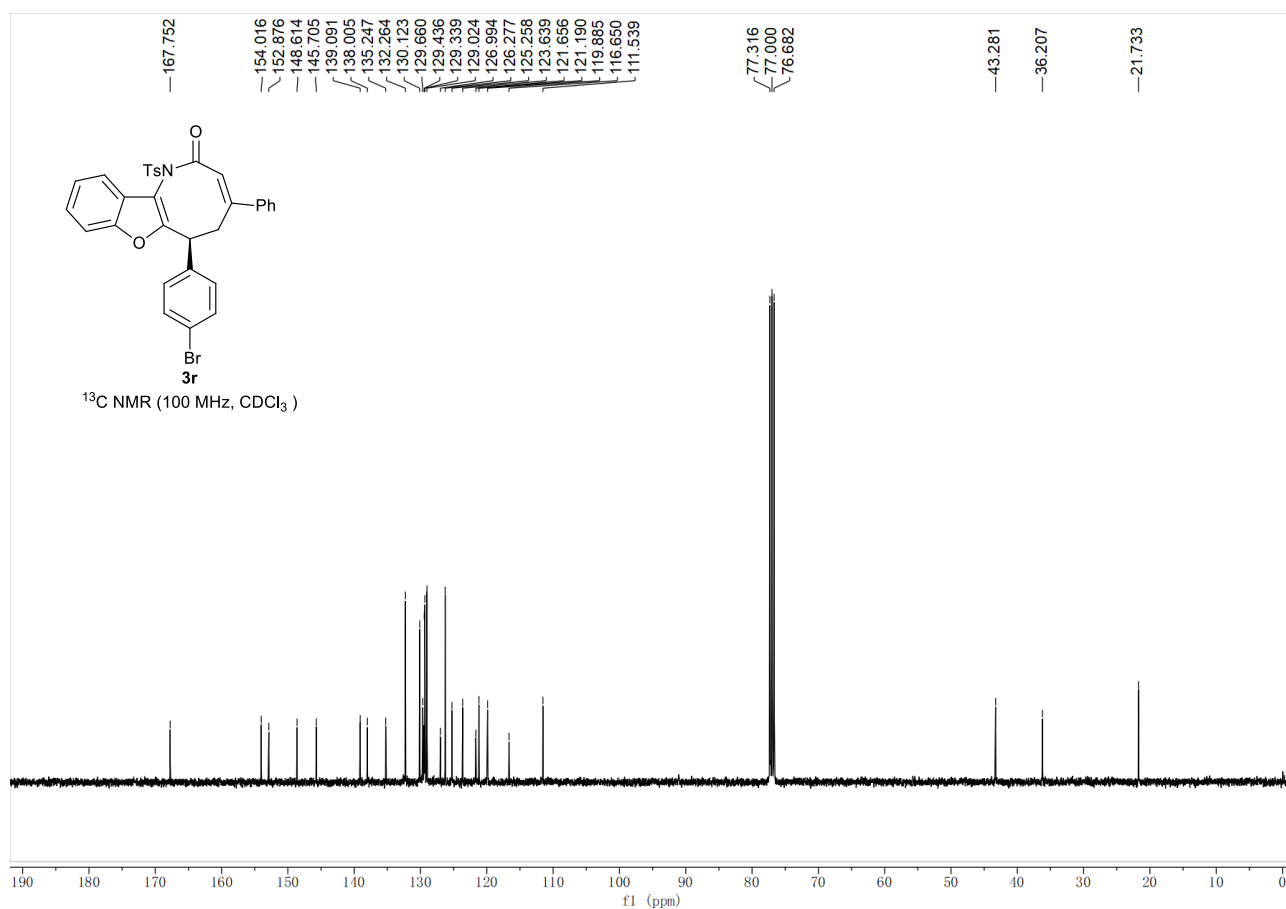

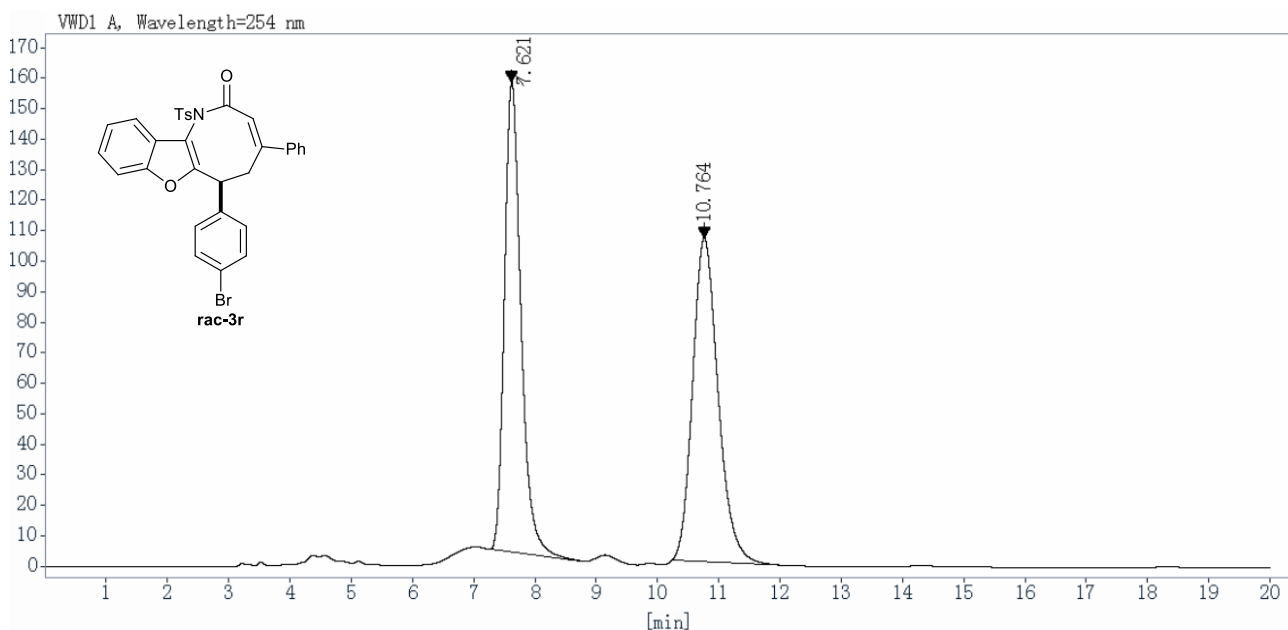

| Ret Time<br>[min] | Peak<br>Type | Width<br>[min] | Height<br>[mAU] | Area<br>[mAU*s] | Area<br>[%] |
|-------------------|--------------|----------------|-----------------|-----------------|-------------|
| 7.621             | BBA          | 0.29           | 154.0291        | 2885.5017       | 48.4456     |
| 10.764            | BB           | 0.44           | 106.0464        | 3070.6709       | 51.5544     |
| Totals:           |              |                |                 | 5956.1726       | 100.0000    |

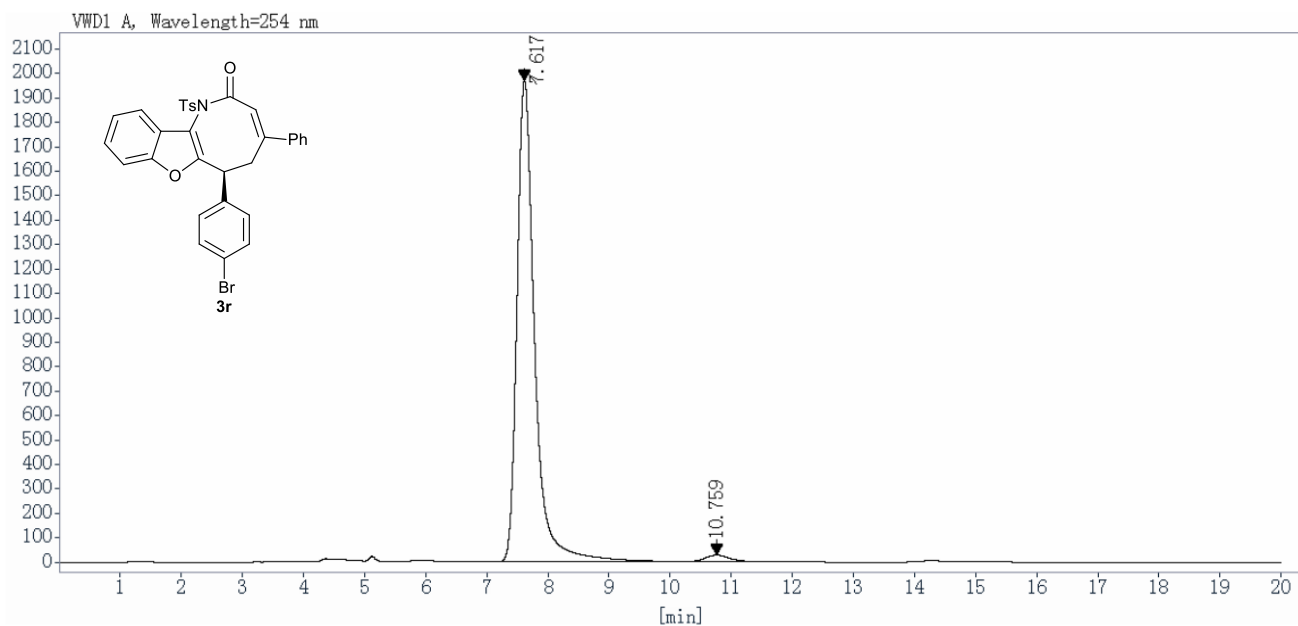

| Ret Time<br>[min] | Peak<br>Type | Width<br>[min] | Height<br>[mAU] | Area<br>[mAU*s] | Area<br>[%] |
|-------------------|--------------|----------------|-----------------|-----------------|-------------|
| 7.617             | BV R         | 0.30           | 1971.0920       | 39808.8828      | 97.9480     |
| 10.759            | VB E         | 0.46           | 27.1093         | 833.9889        | 2.0520      |
| Totals:           |              |                |                 | 40642.8717      | 100.0000    |

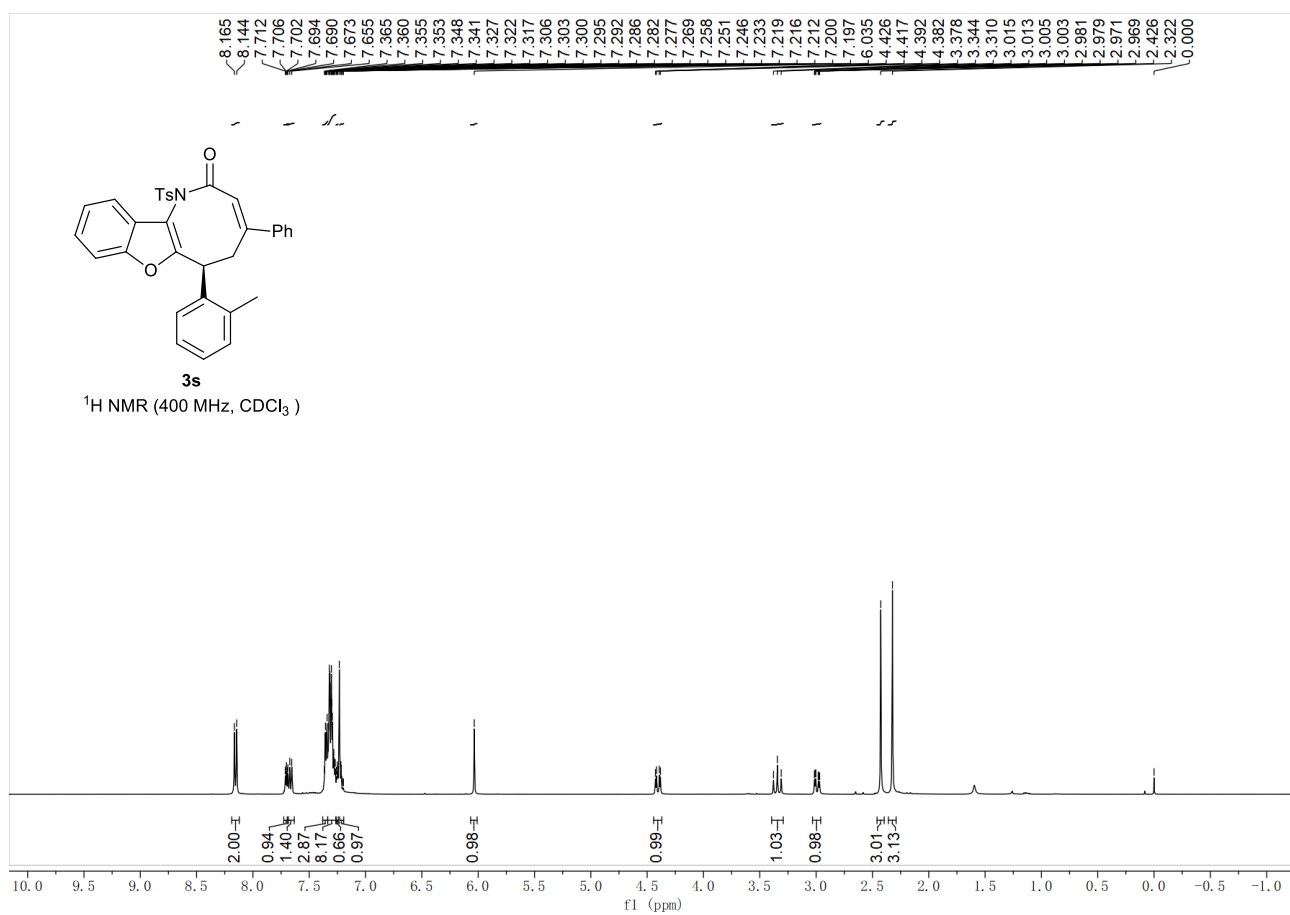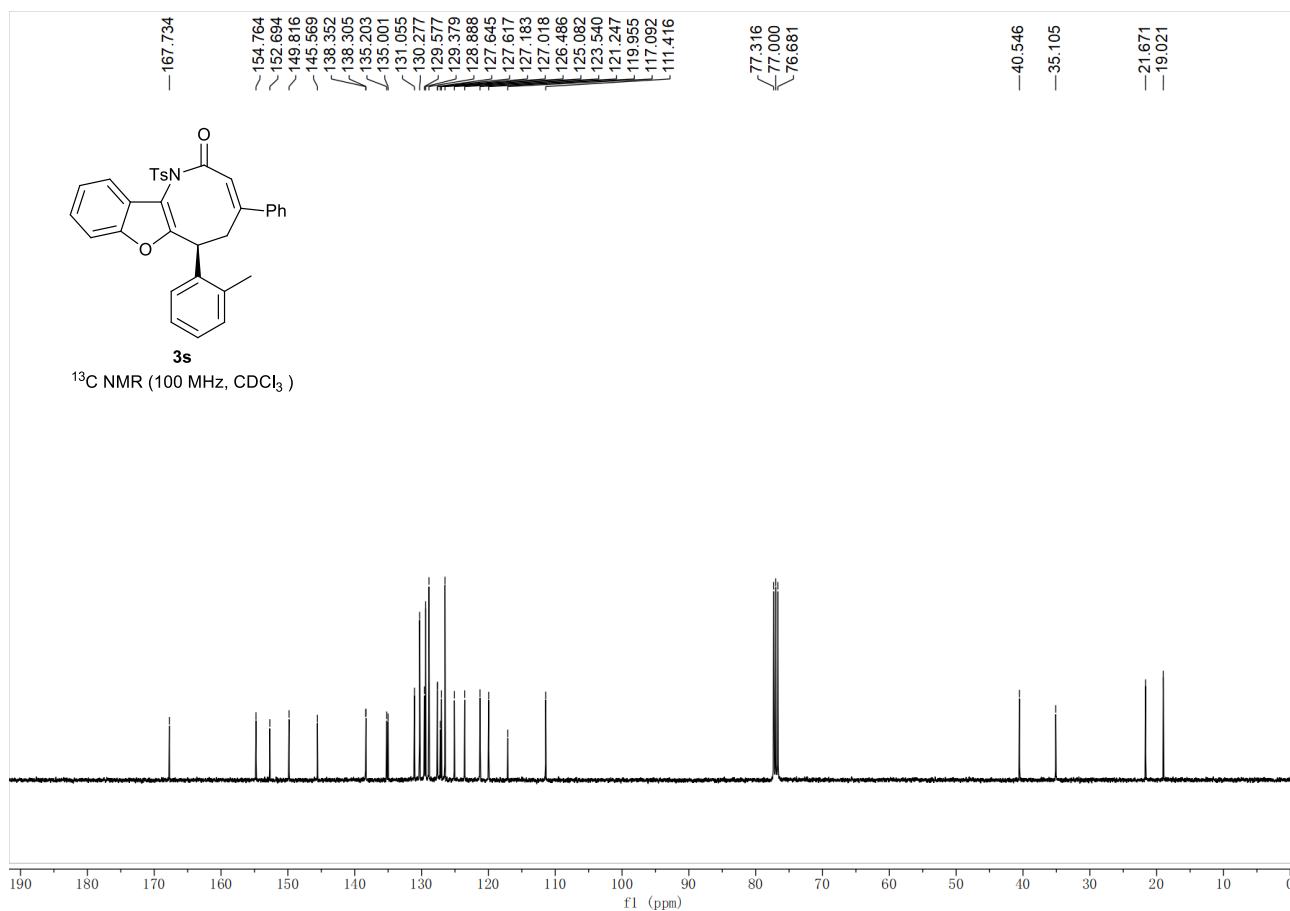

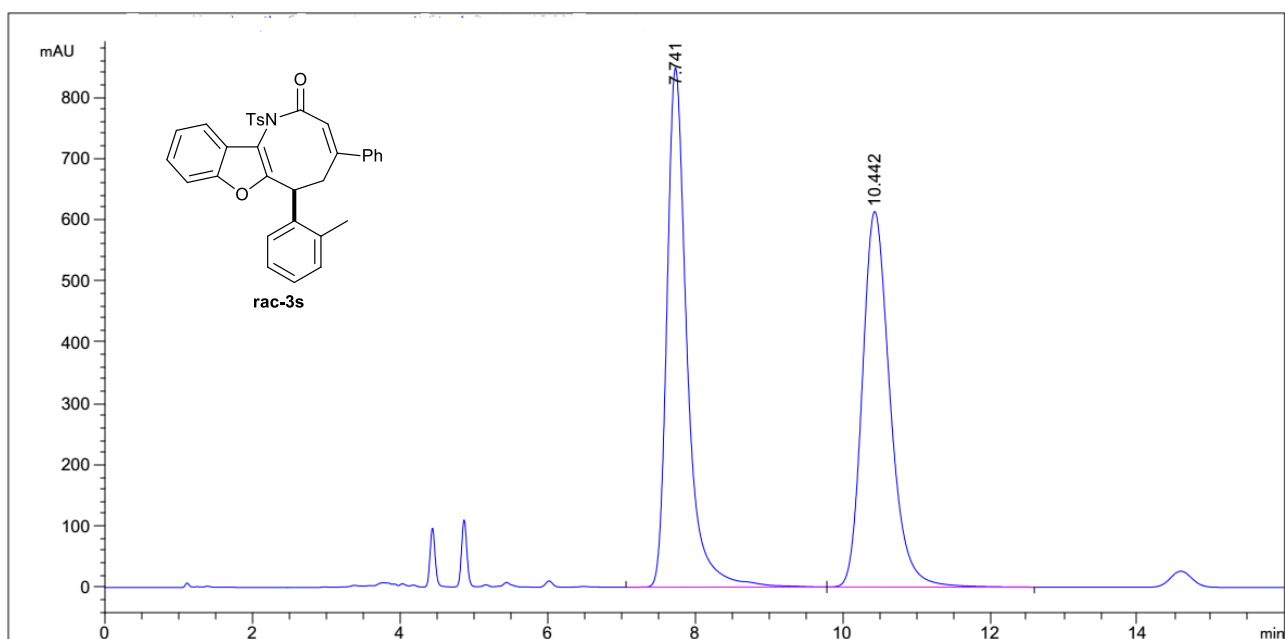

| Peak # | RetTime [min] | Type | Width [min] | Area mAU *s | Height [mAU] | Area %  |
|--------|---------------|------|-------------|-------------|--------------|---------|
| 1      | 7.741         | BB   | 0.2845      | 1.60071e4   | 847.27454    | 50.1066 |
| 2      | 10.442        | BBA  | 0.3996      | 1.59390e4   | 612.64893    | 49.8934 |

Totals : 3.19462e4 1459.92346

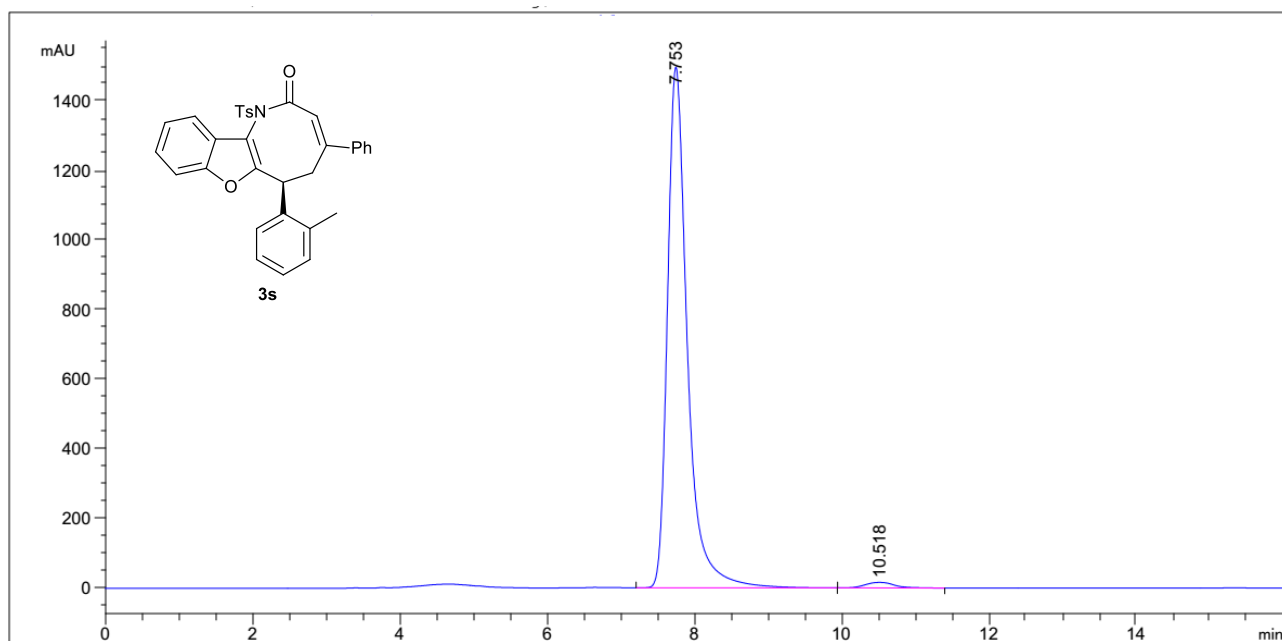

| Peak # | RetTime [min] | Type | Width [min] | Area mAU *s | Height [mAU] | Area %  |
|--------|---------------|------|-------------|-------------|--------------|---------|
| 1      | 7.753         | BB   | 0.2832      | 2.80819e4   | 1494.92029   | 98.4621 |
| 2      | 10.518        | BB   | 0.4343      | 438.60648   | 15.88174     | 1.5379  |

Totals : 2.85205e4 1510.80203

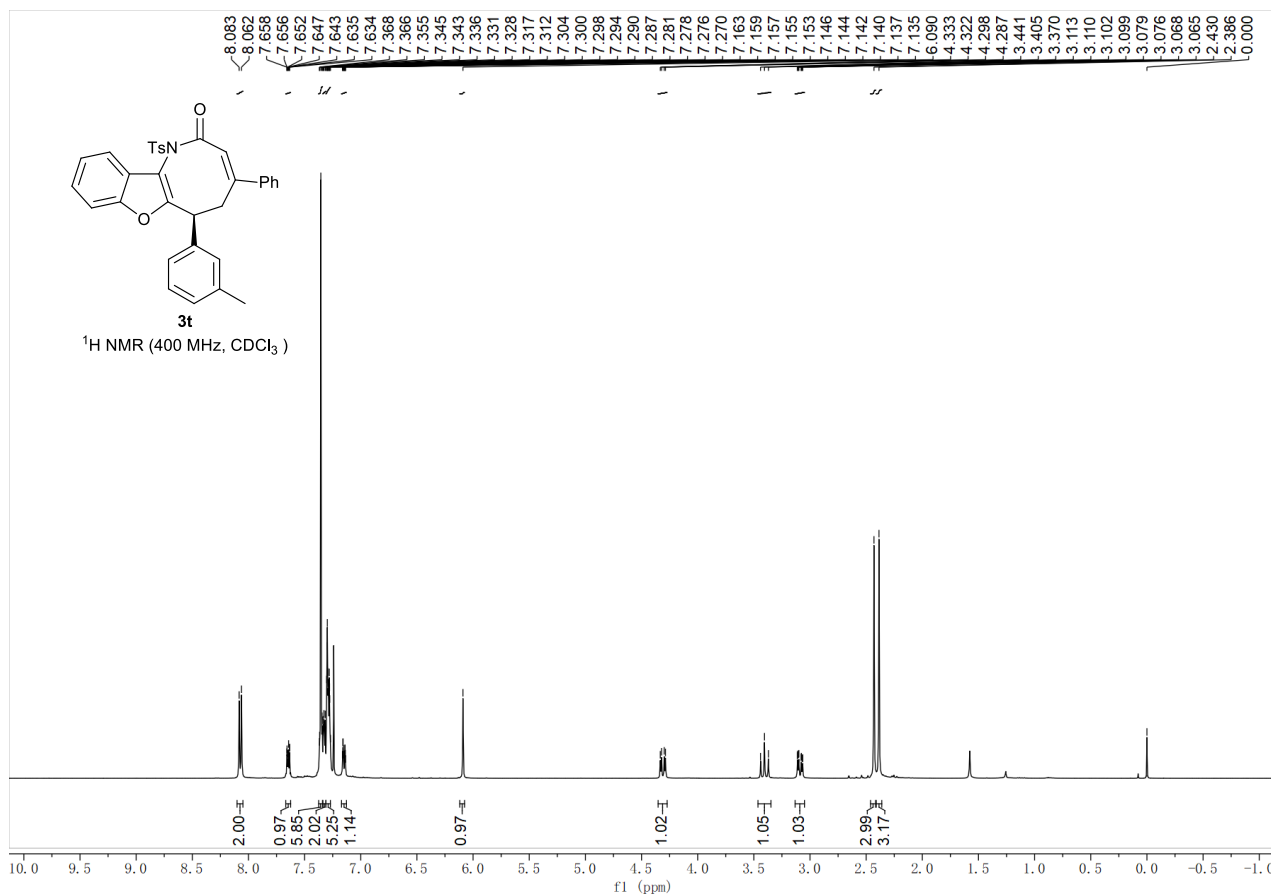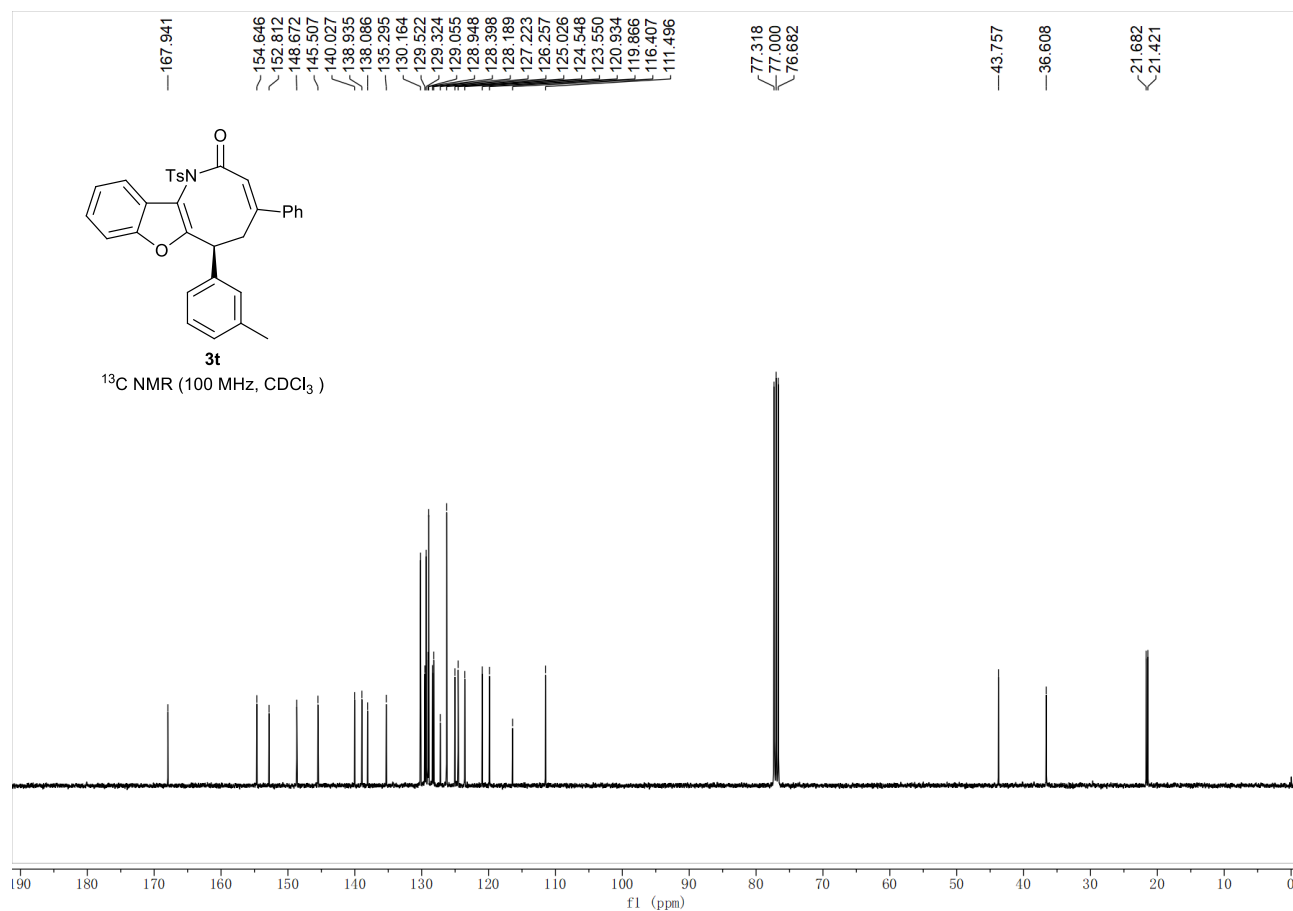



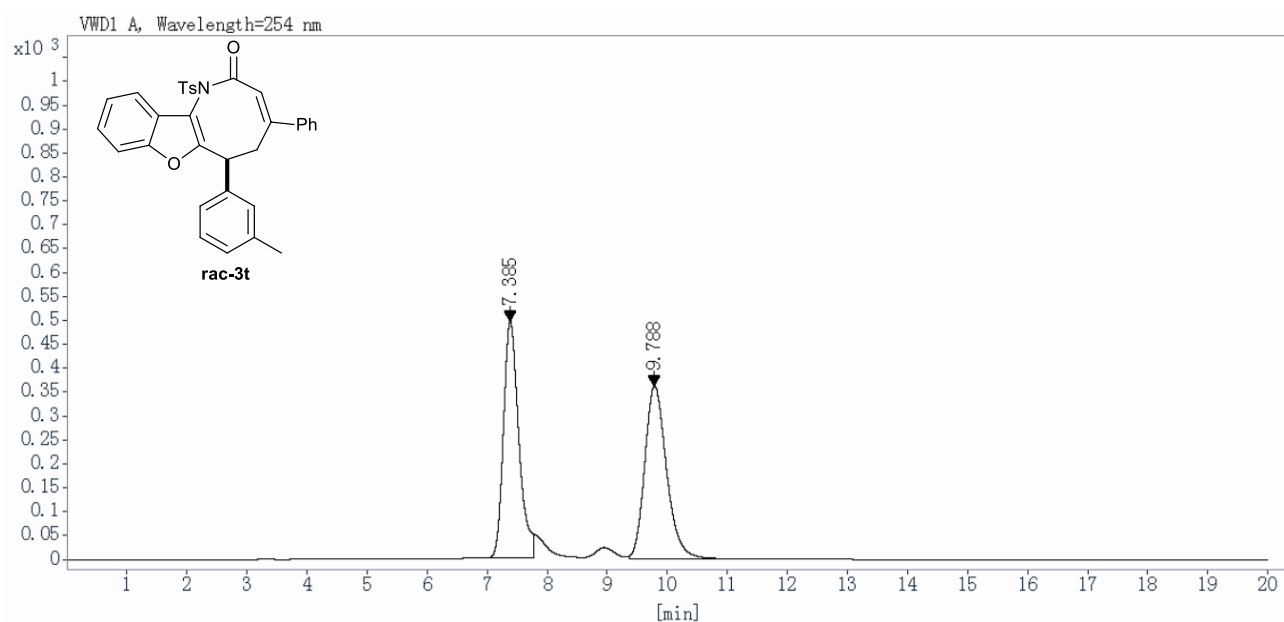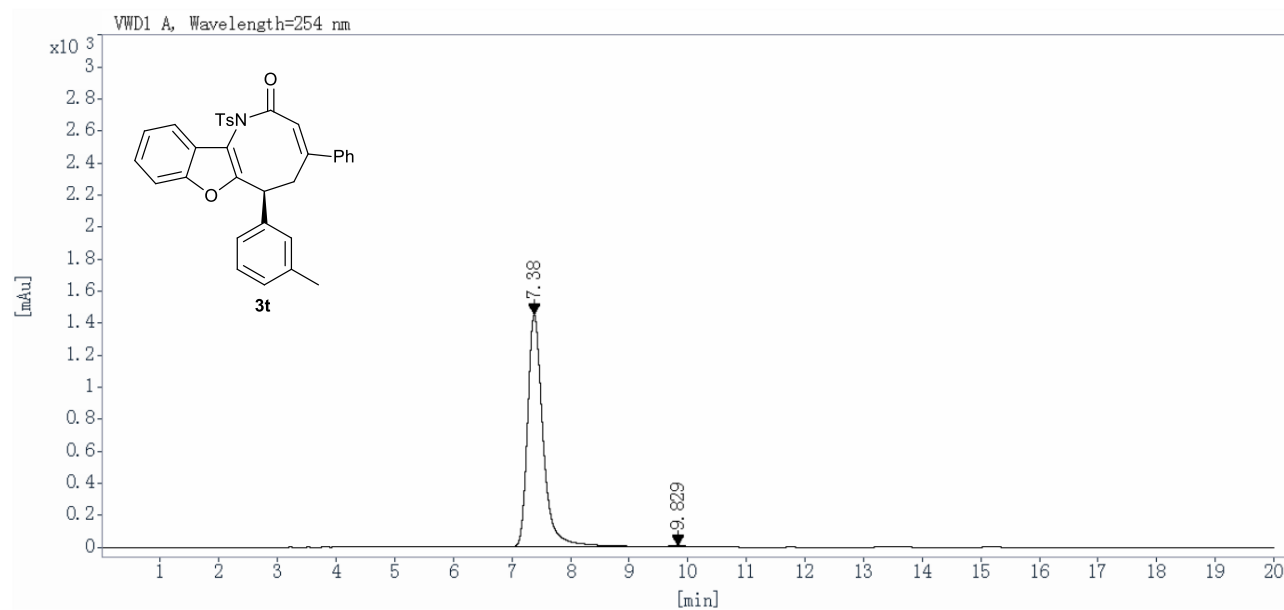

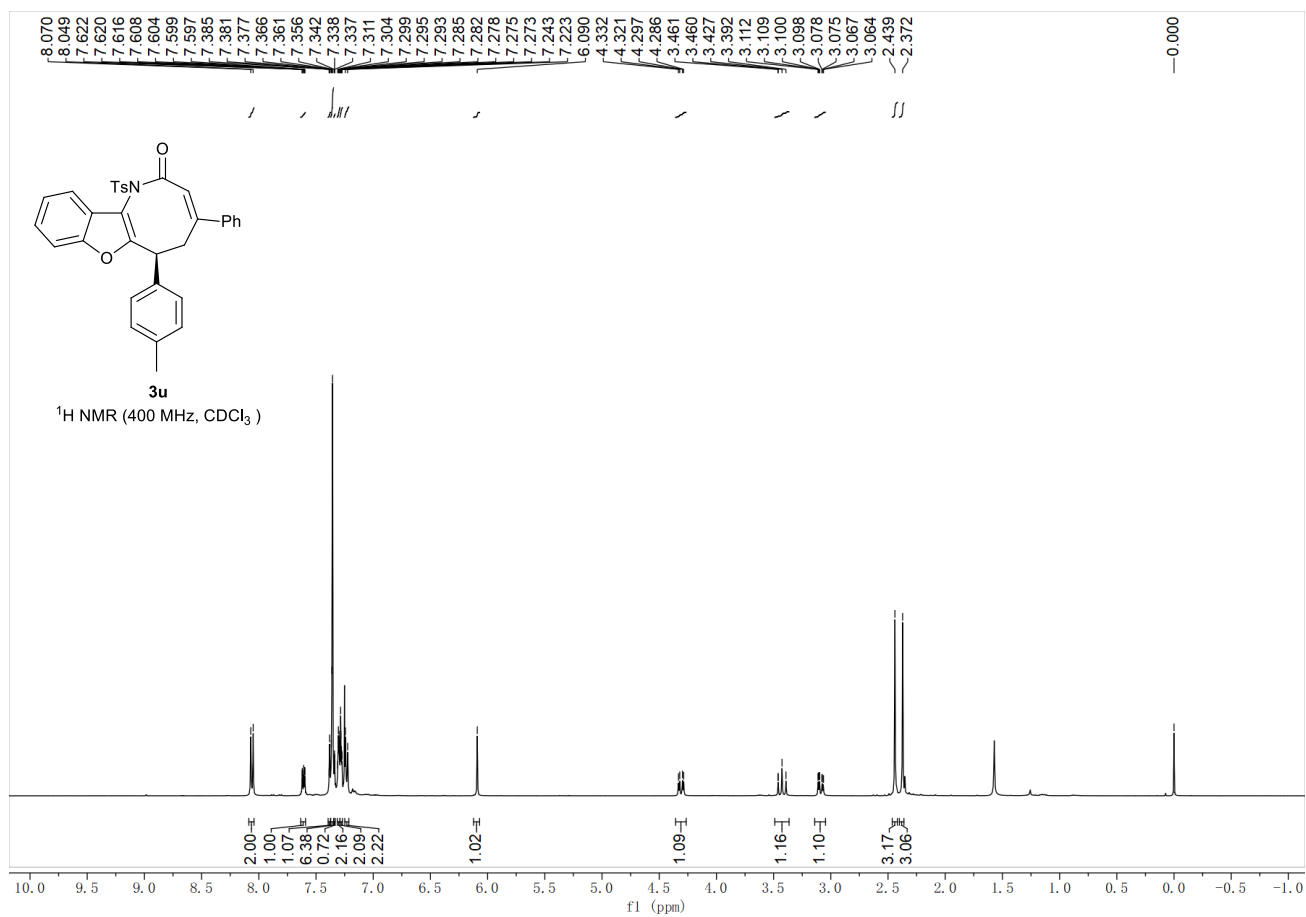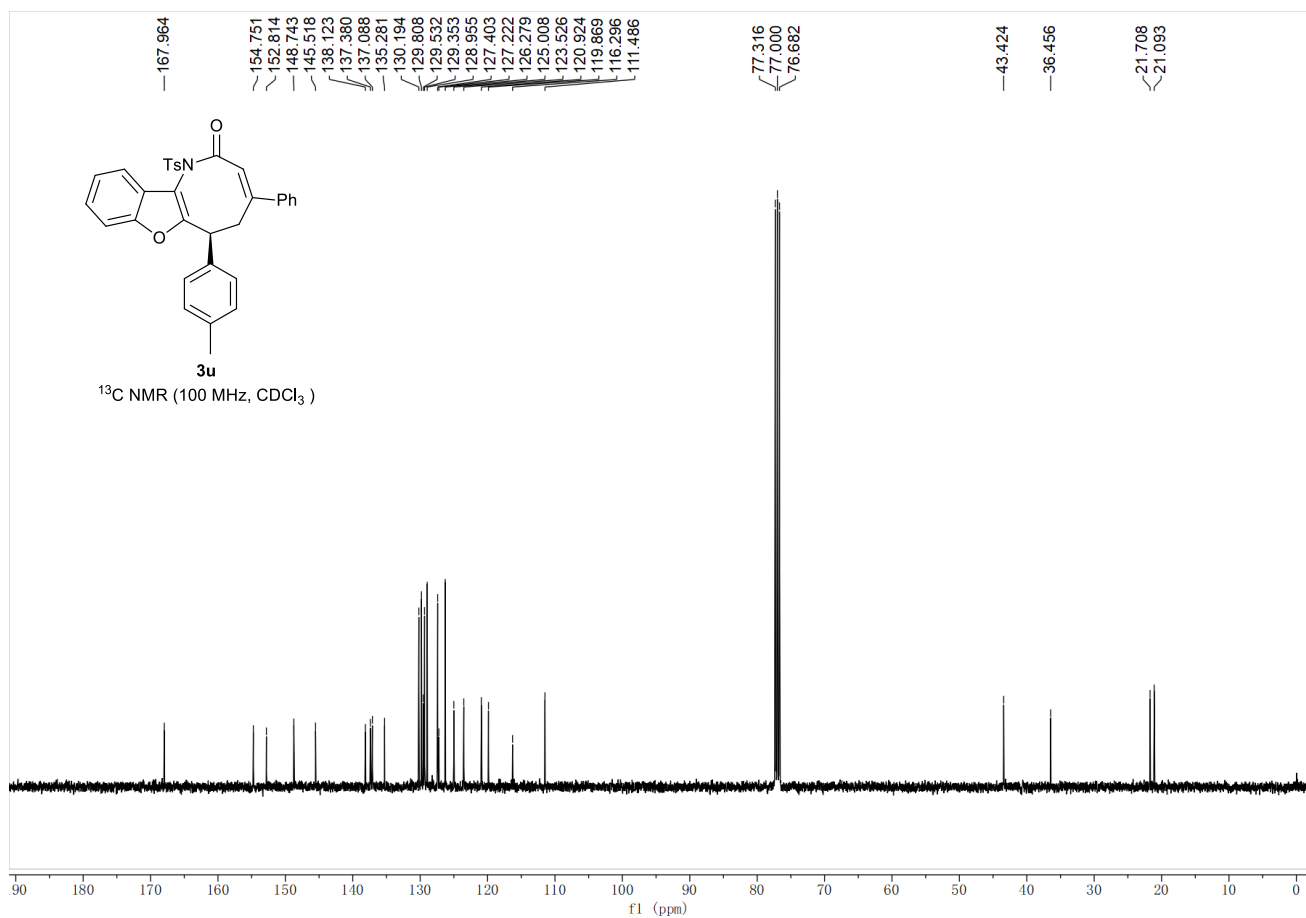

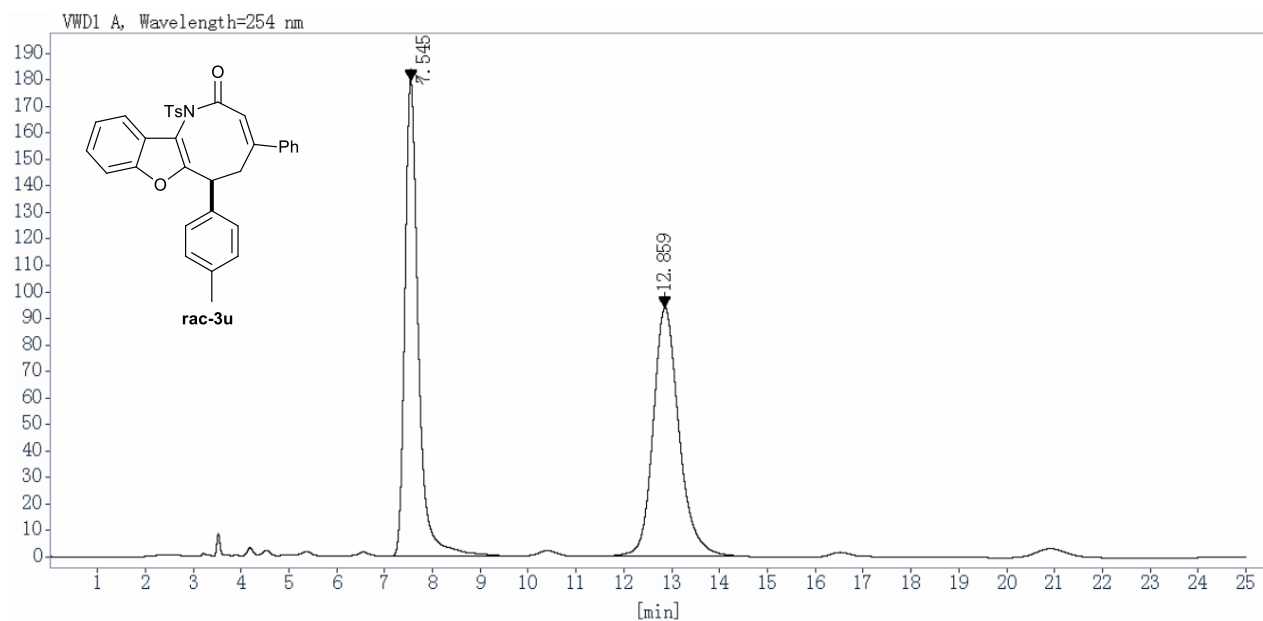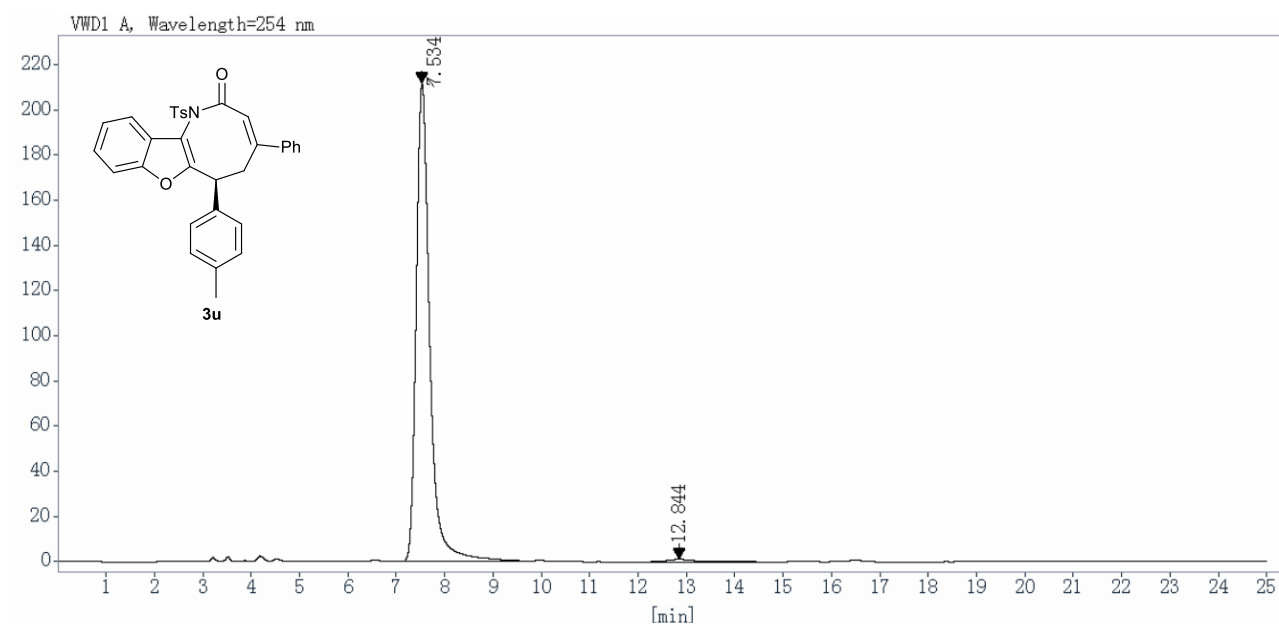

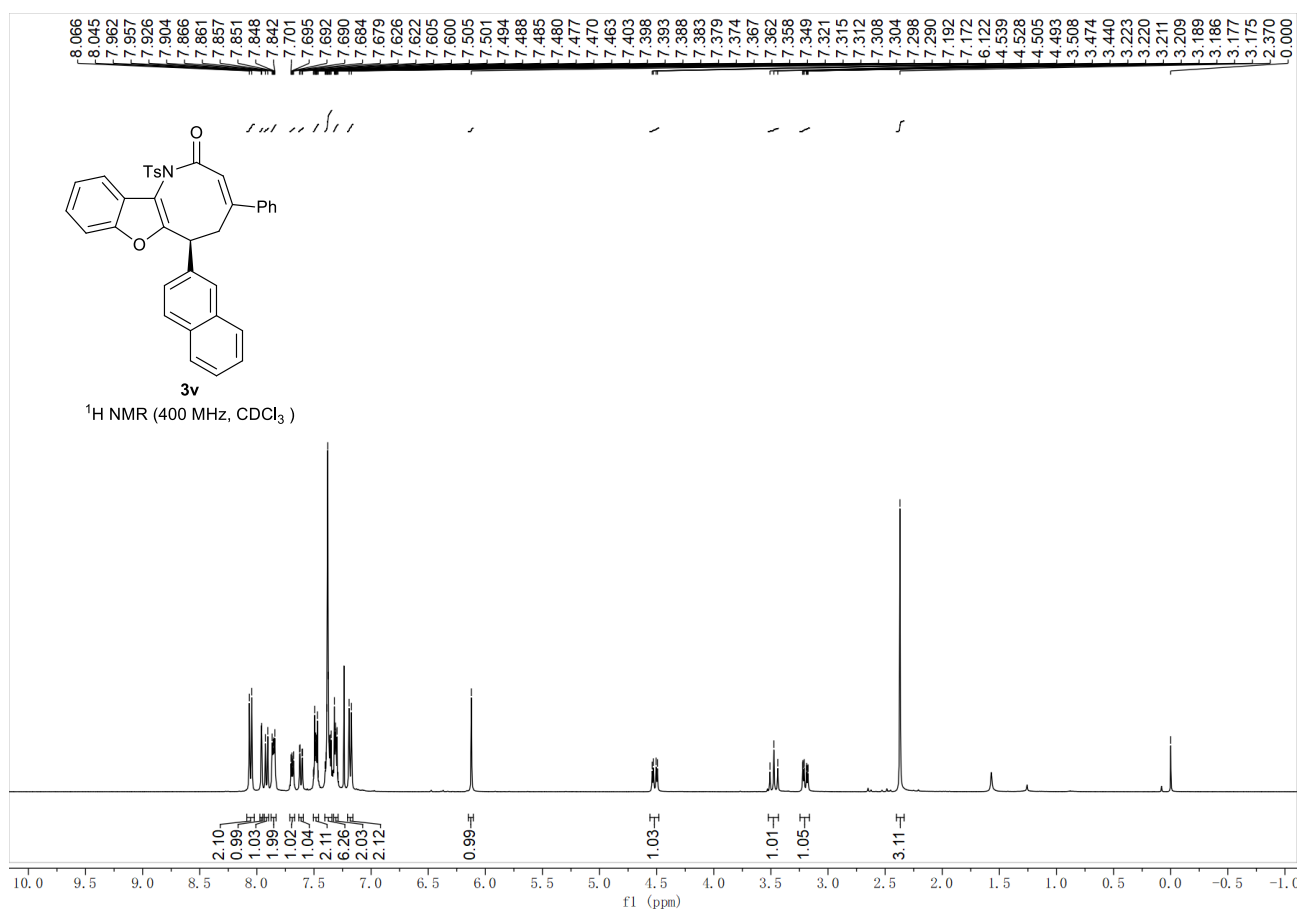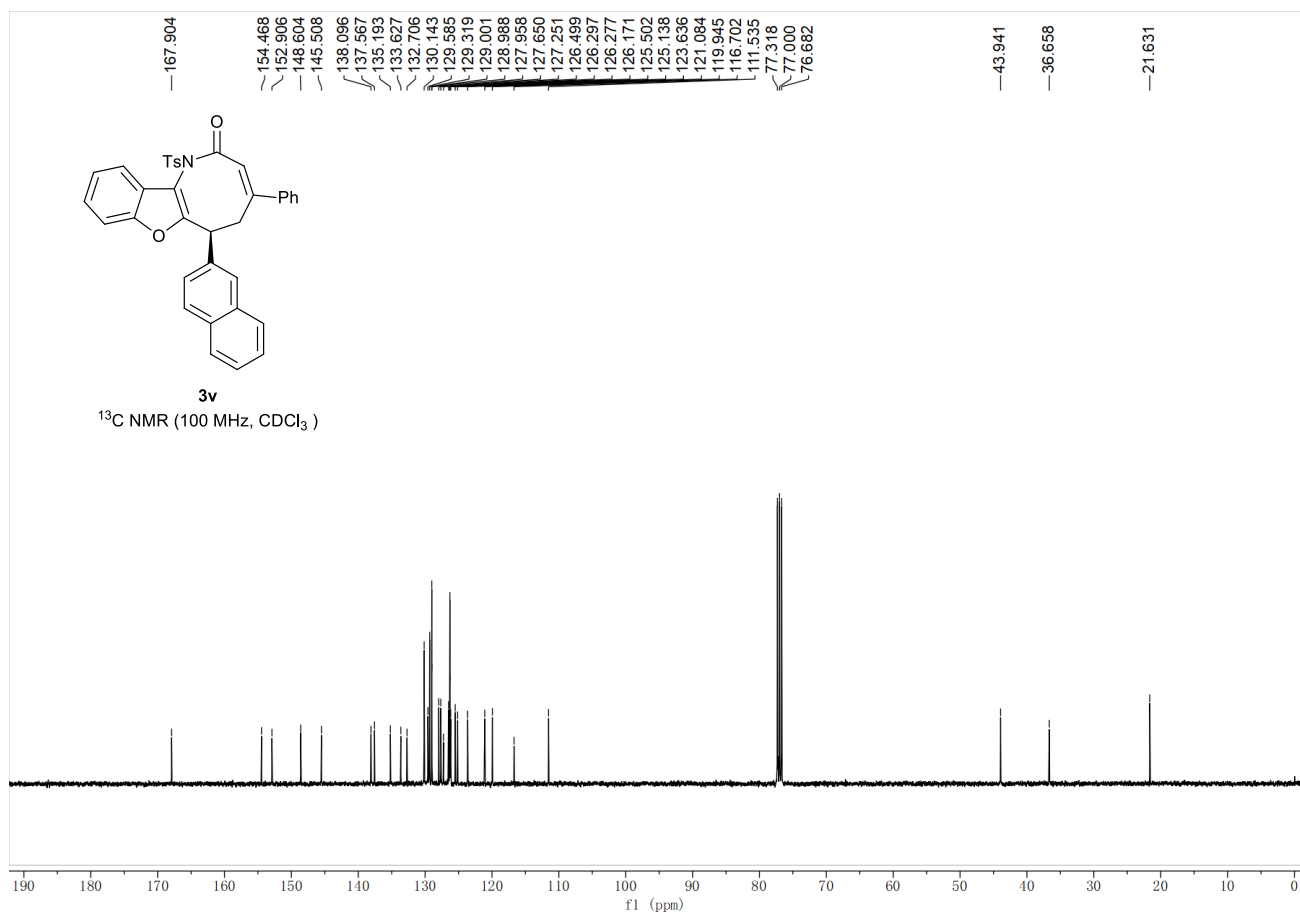

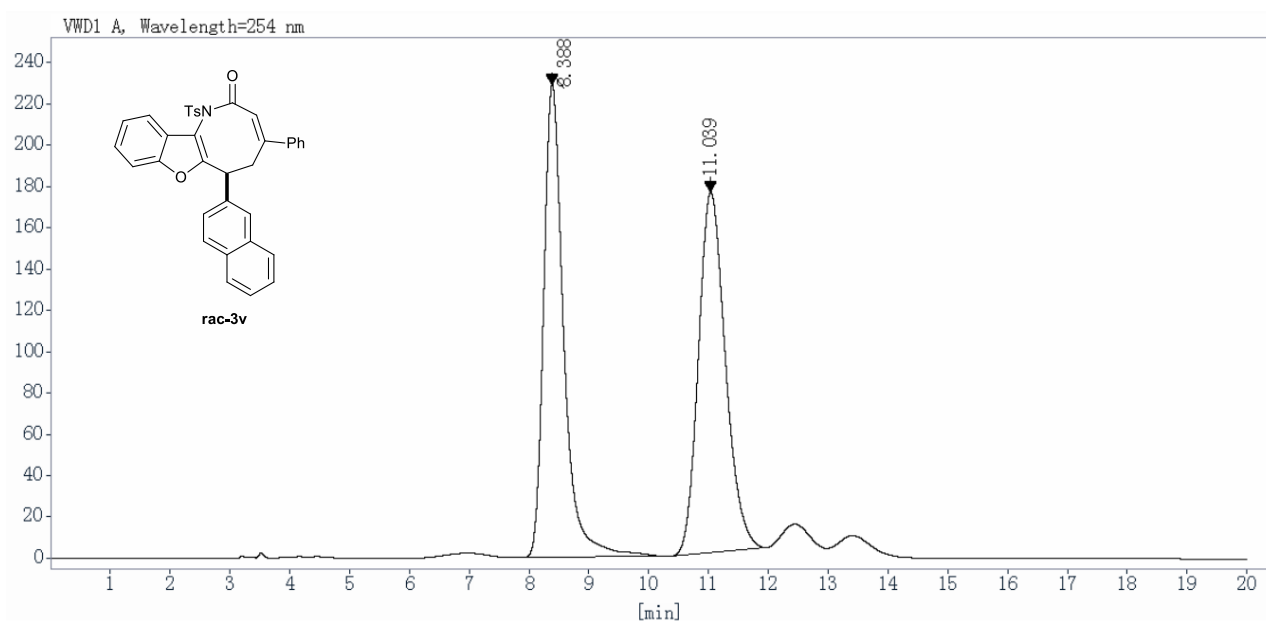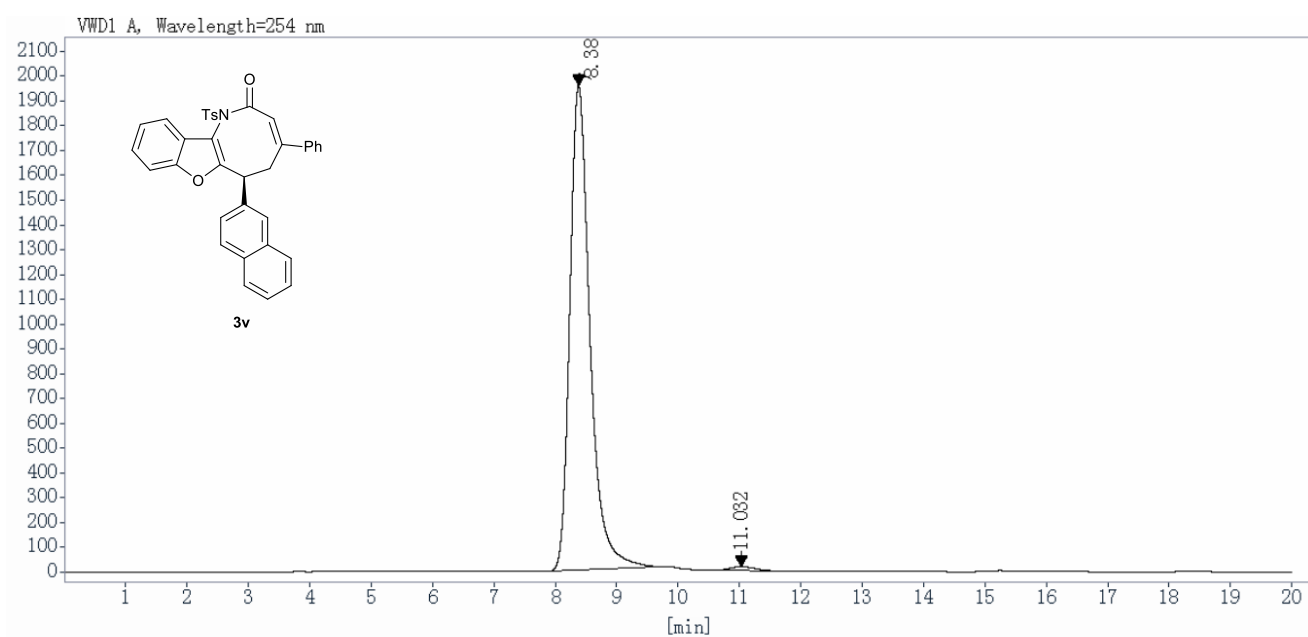

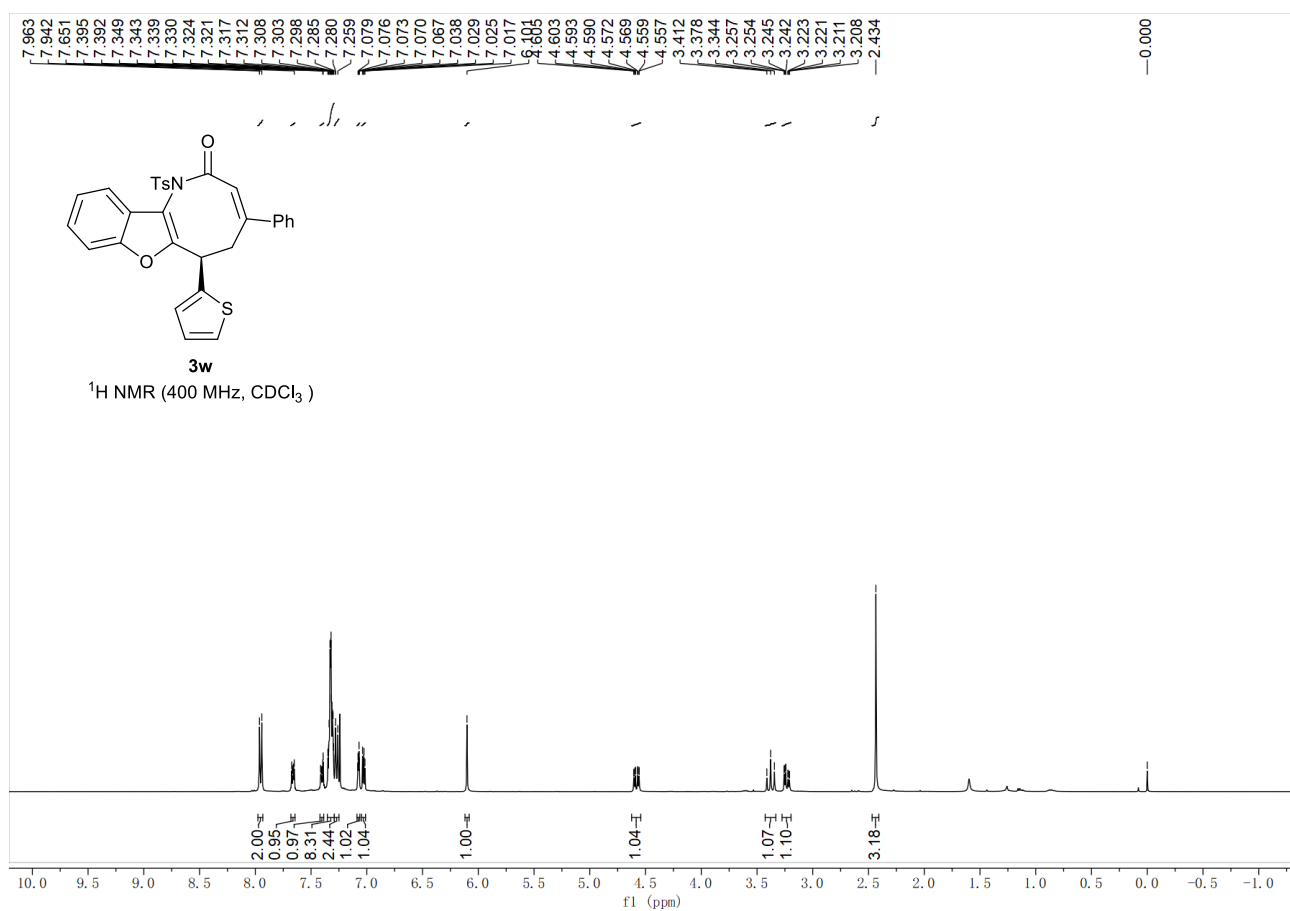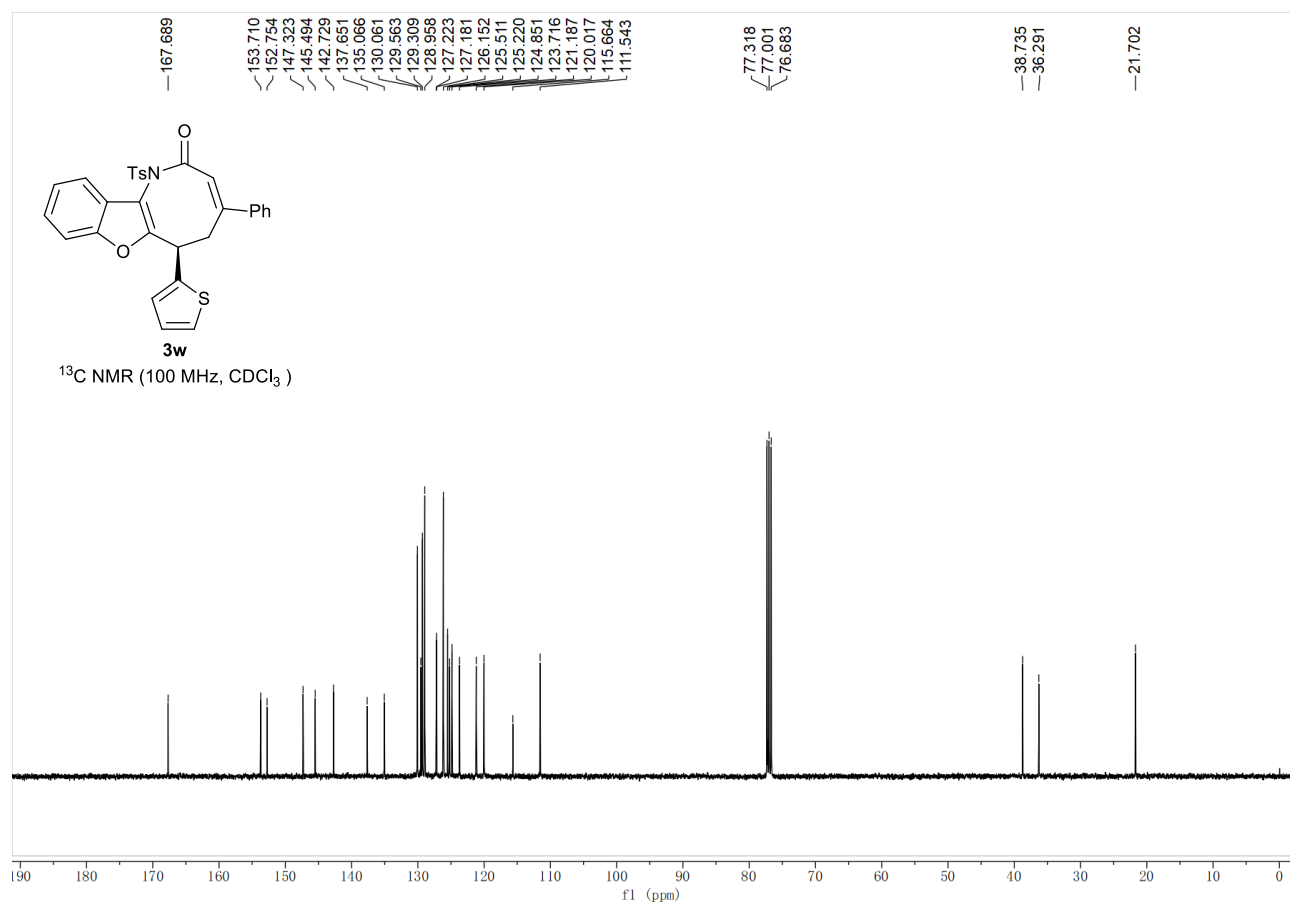

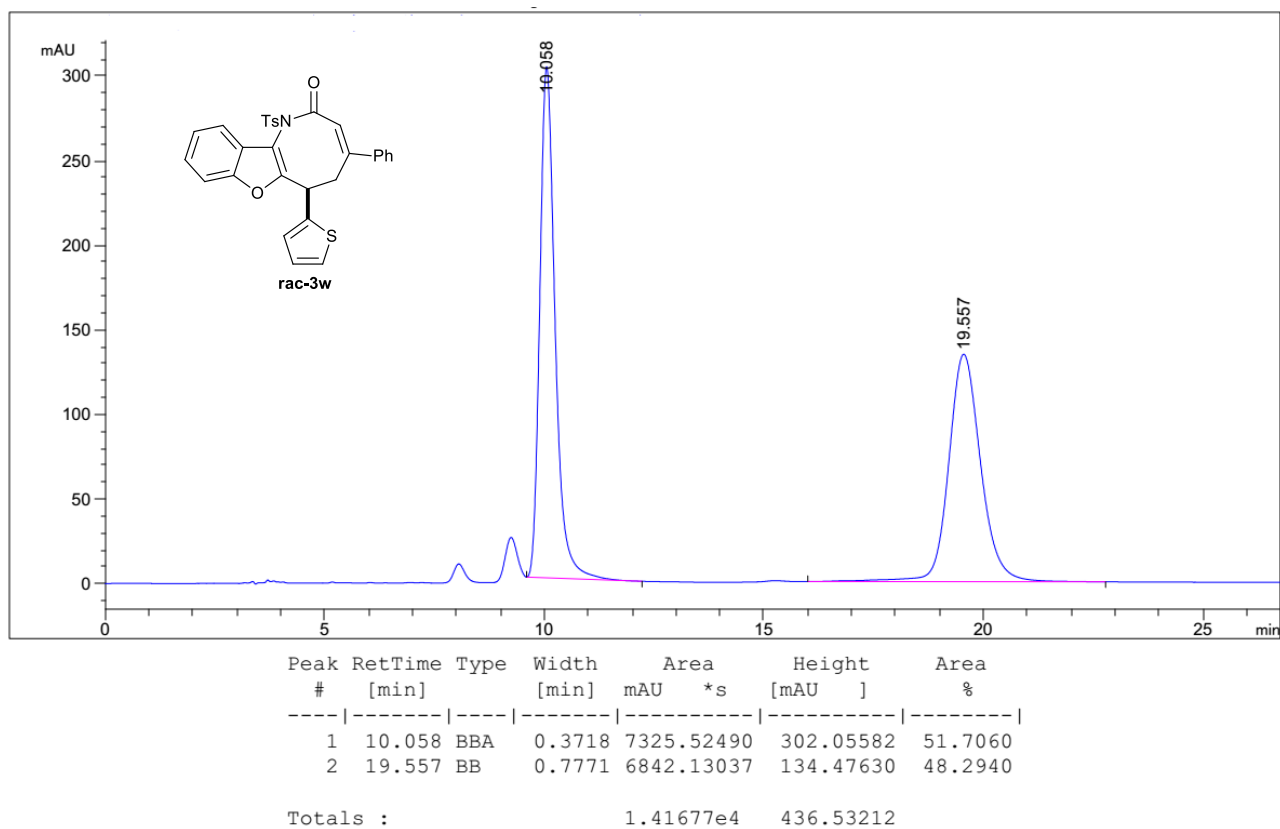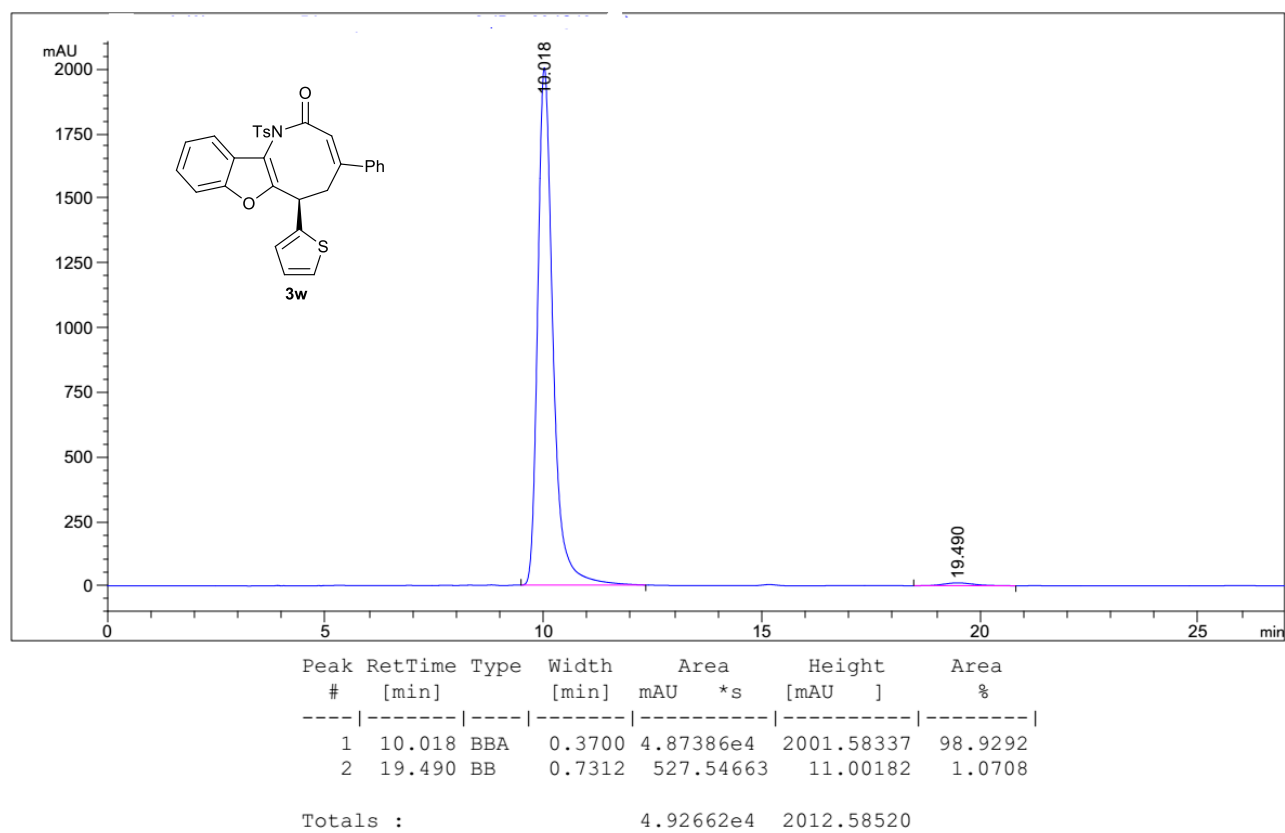

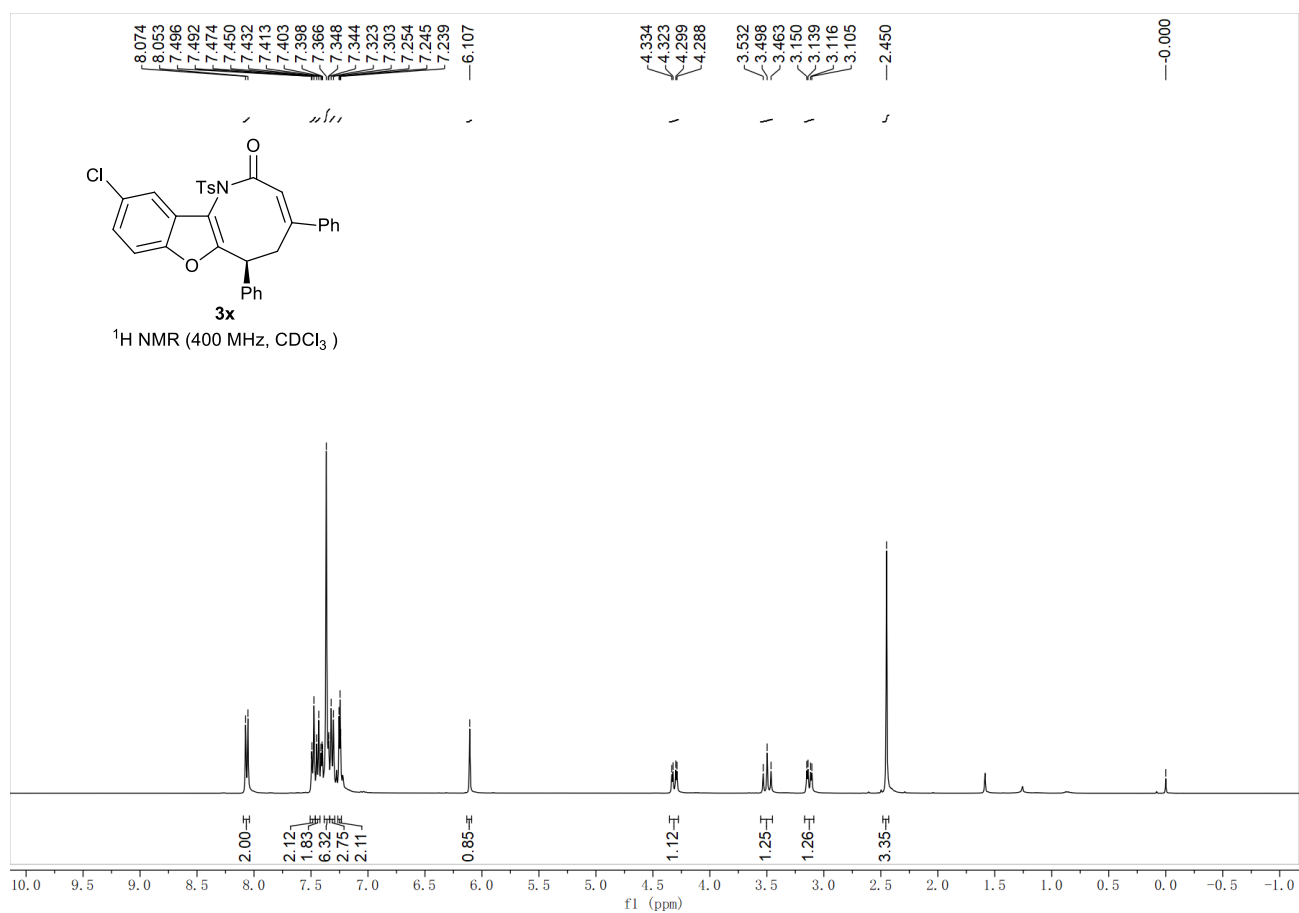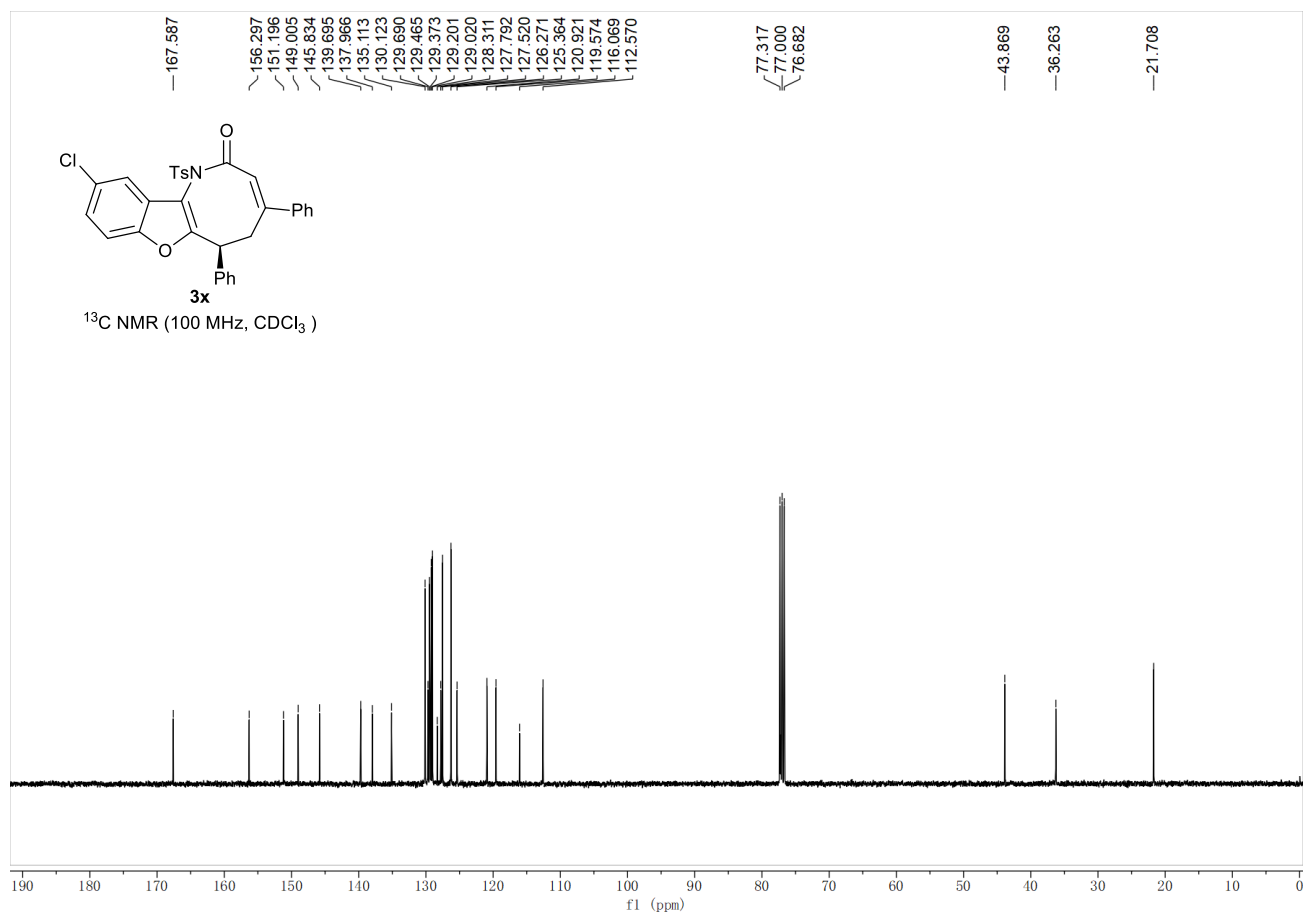



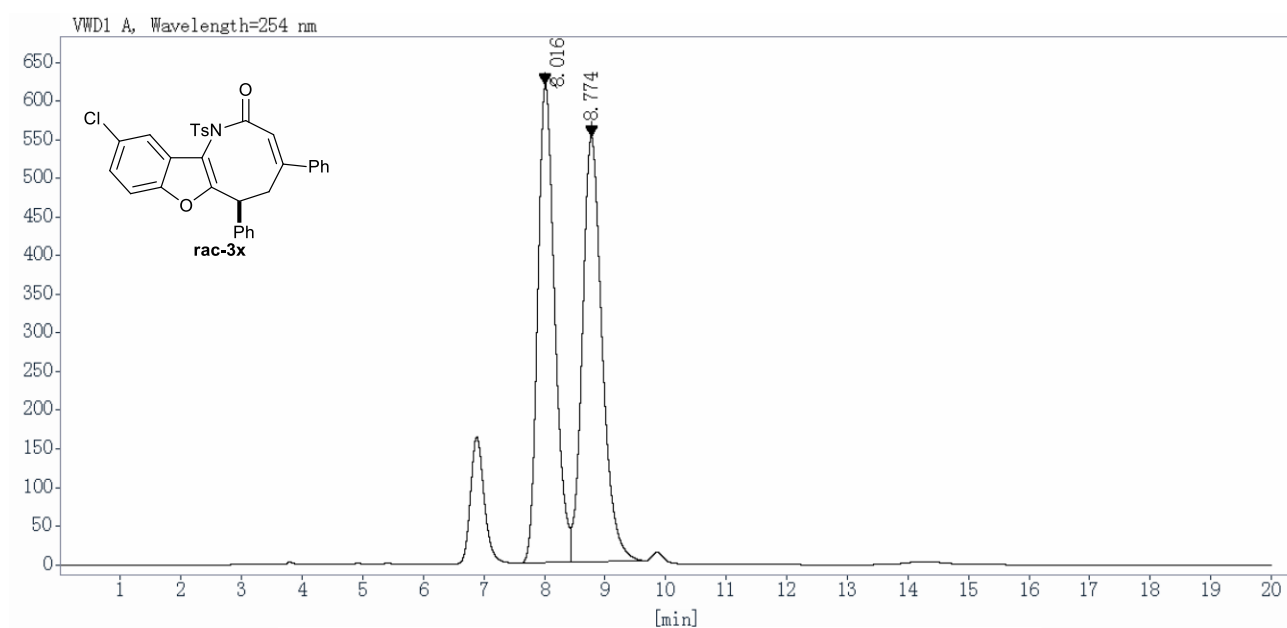

| Ret Time<br>[min] | Peak<br>Type | Width<br>[min] | Height<br>[mAU] | Area<br>[mAU*s] | Area<br>[%] |
|-------------------|--------------|----------------|-----------------|-----------------|-------------|
| 8.016             | BV           | 0.30           | 619.1596        | 12074.5703      | 49.1901     |
| 8.774             | VBA          | 0.35           | 550.1202        | 12472.1768      | 50.8099     |
| Totals:           |              |                |                 | 24546.7471      | 100.0000    |

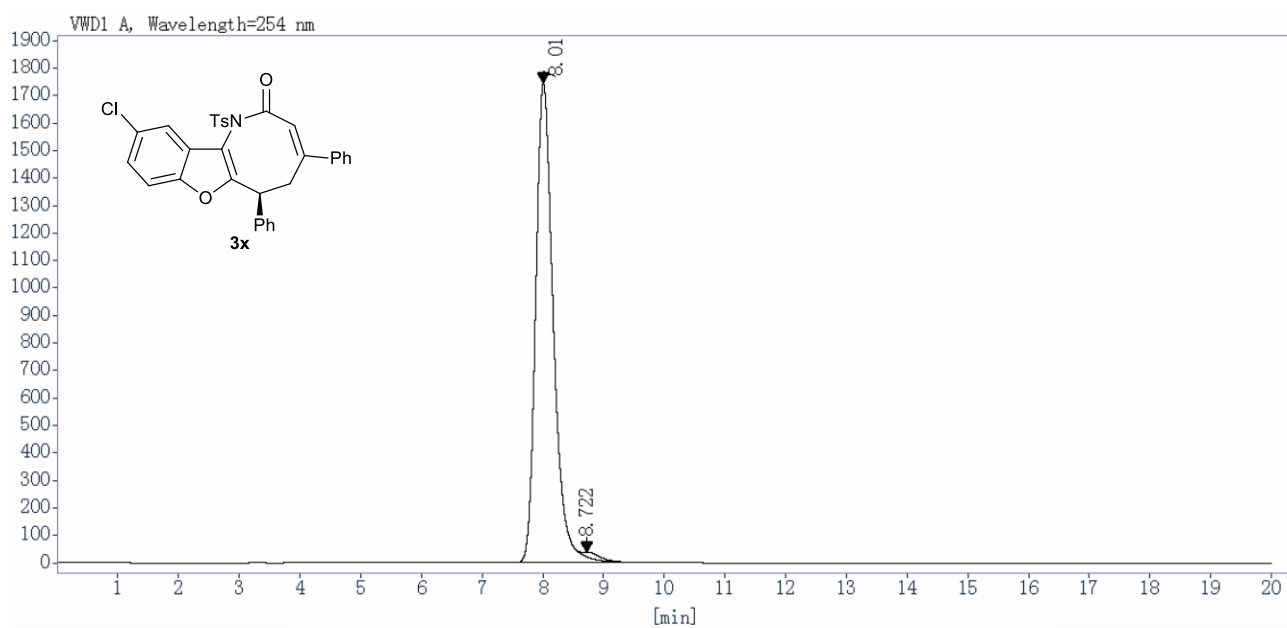

| Ret Time<br>[min] | Peak<br>Type | Width<br>[min] | Height<br>[mAU] | Area<br>[mAU*s] | Area<br>[%] |
|-------------------|--------------|----------------|-----------------|-----------------|-------------|
| 8.010             | BV R         | 0.31           | 1744.1387       | 35100.7578      | 98.8019     |
| 8.722             | VBAE         | 0.35           | 17.1886         | 425.6340        | 1.1981      |
| Totals:           |              |                |                 | 35526.3918      | 100.0000    |

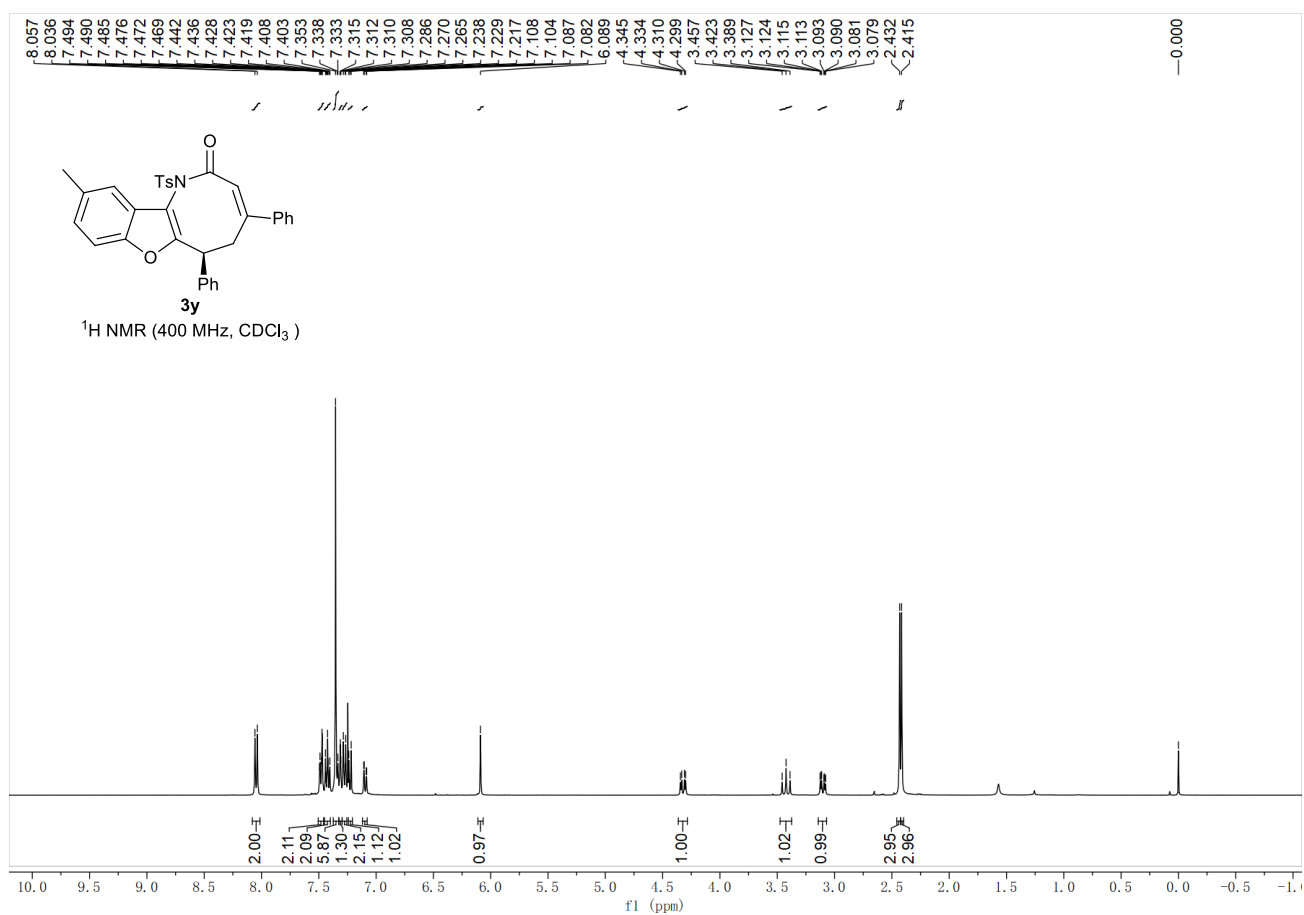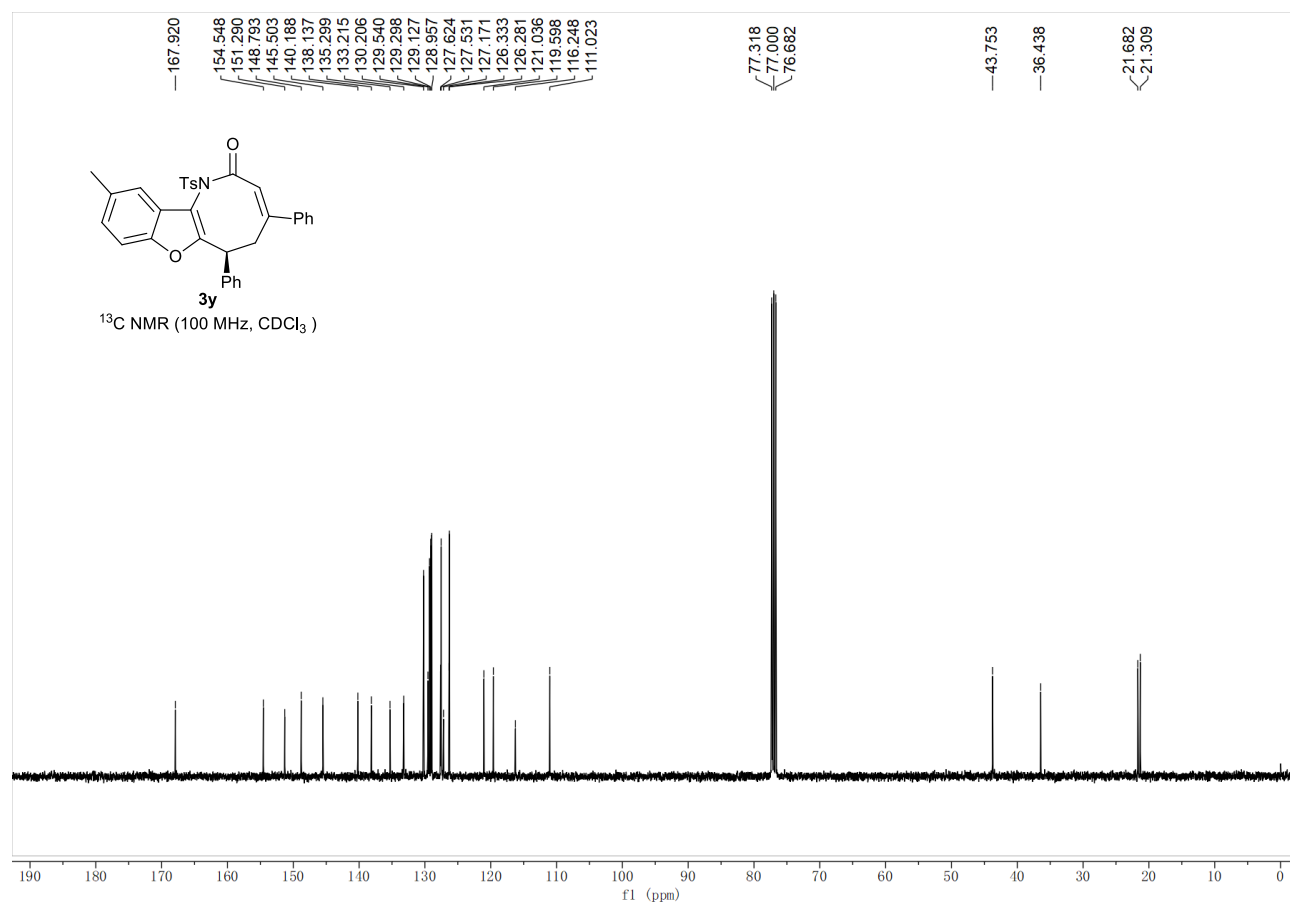

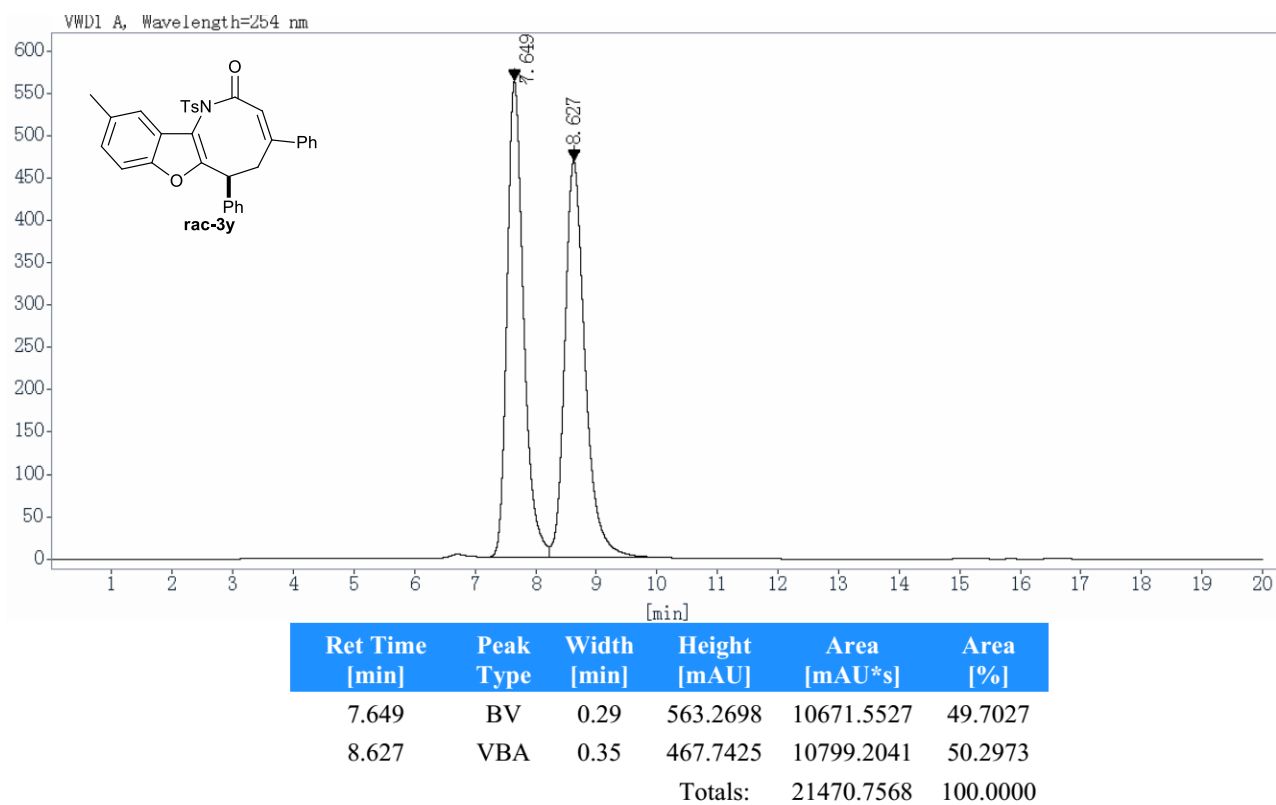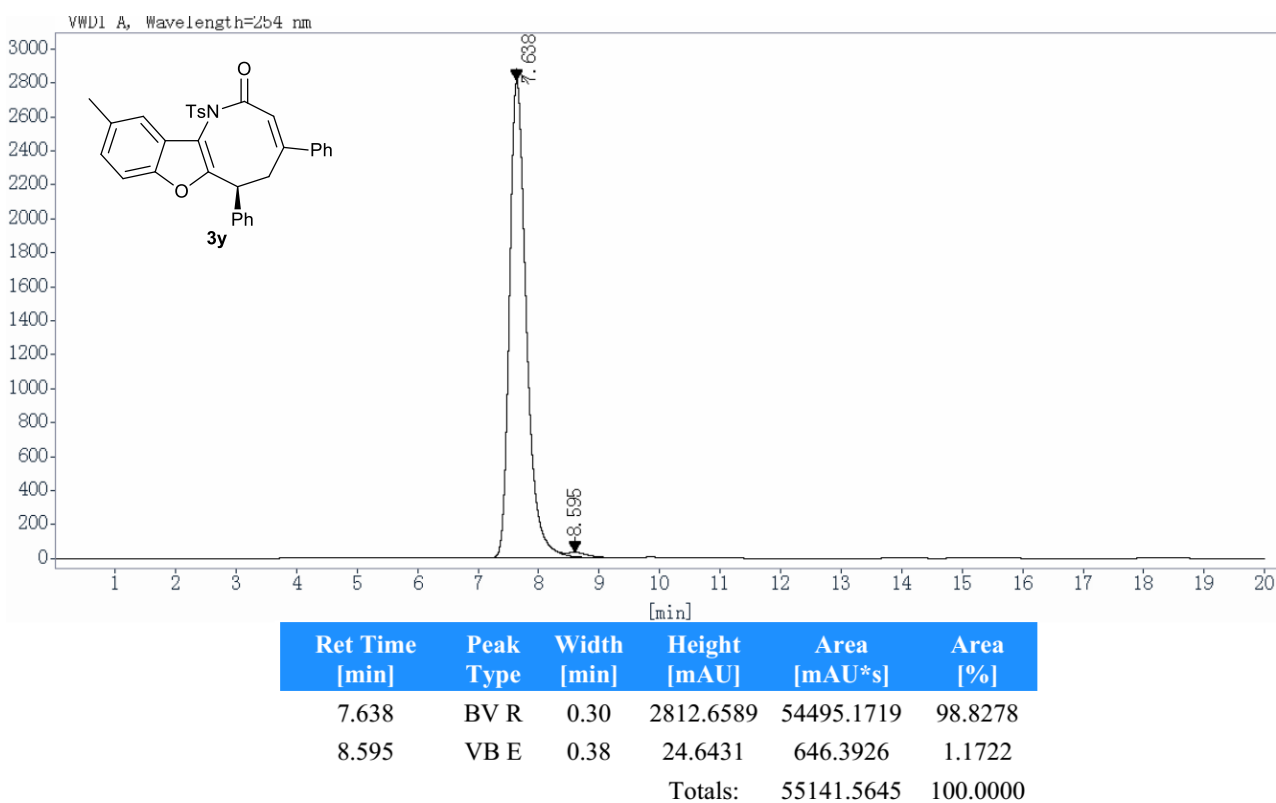

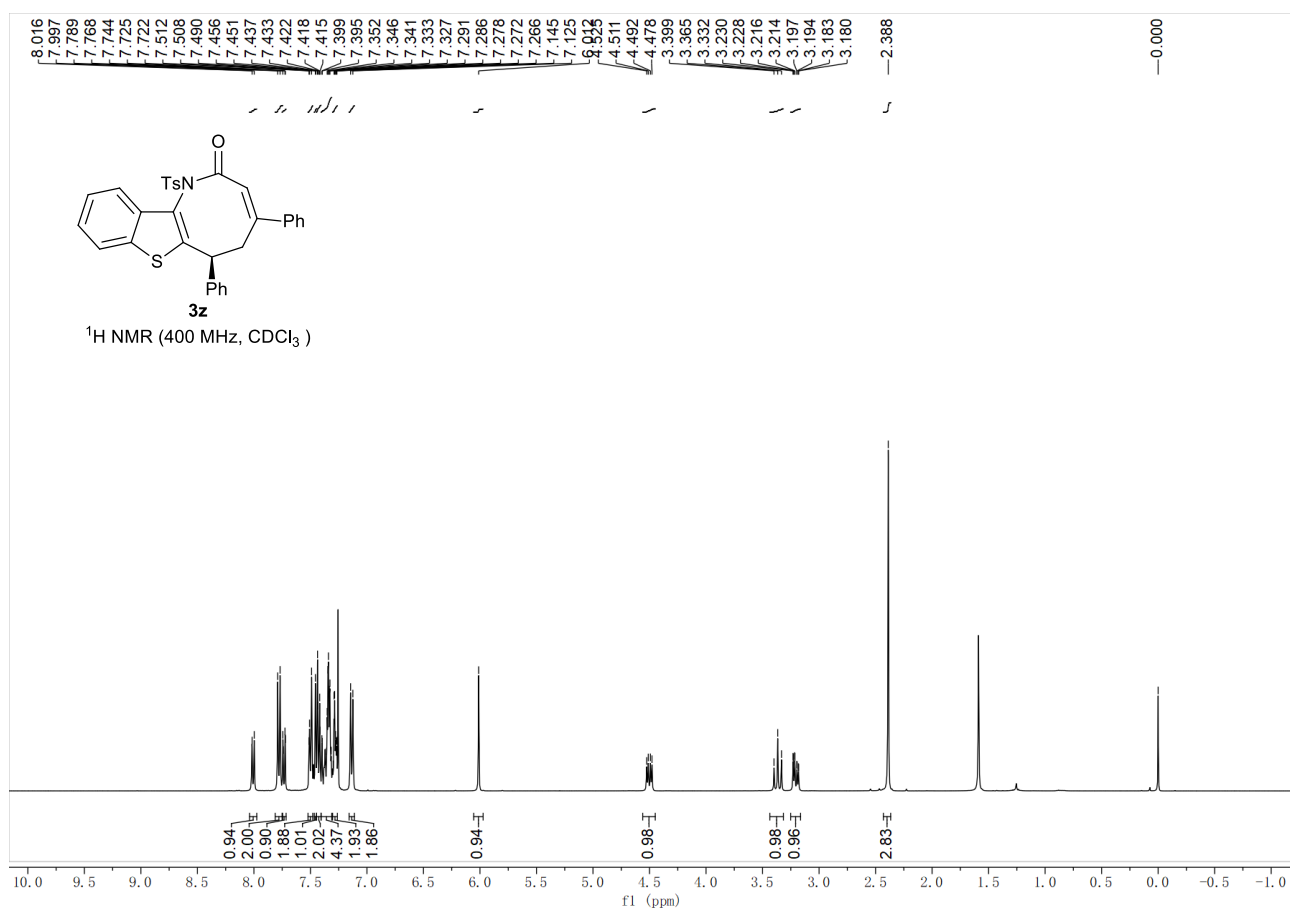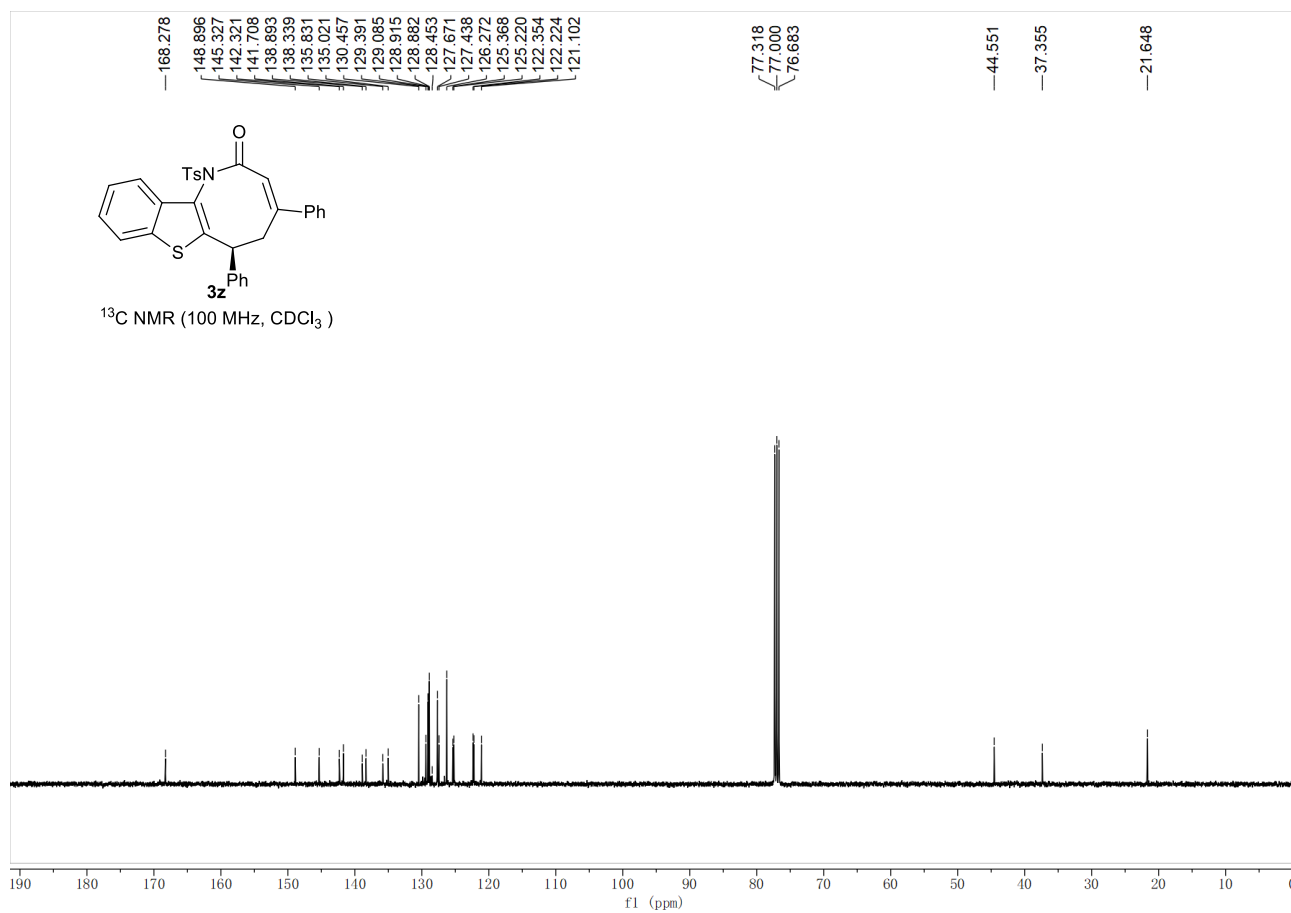

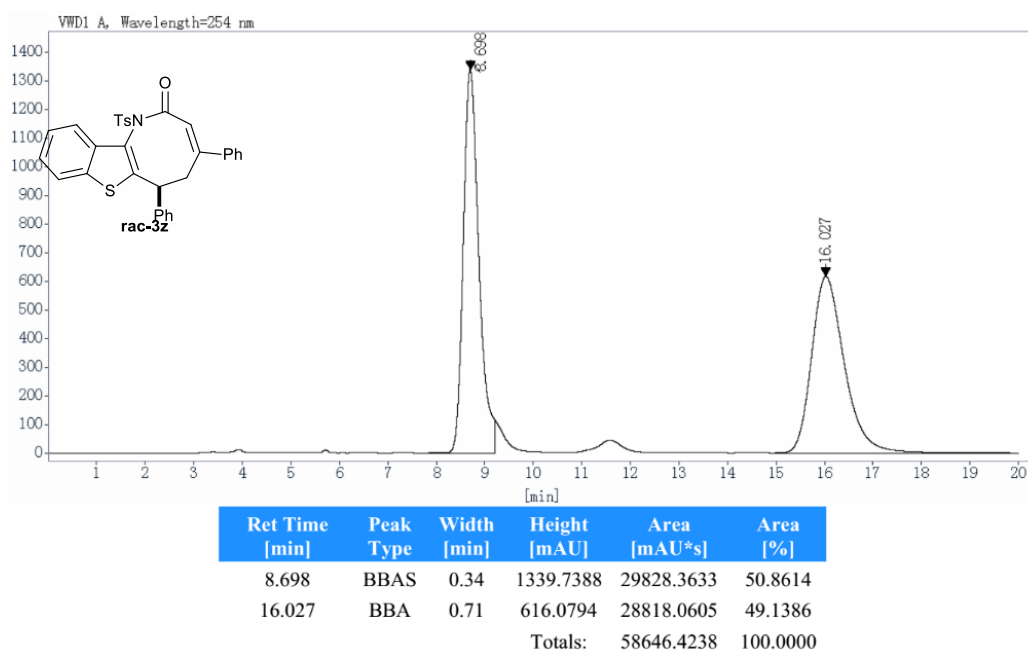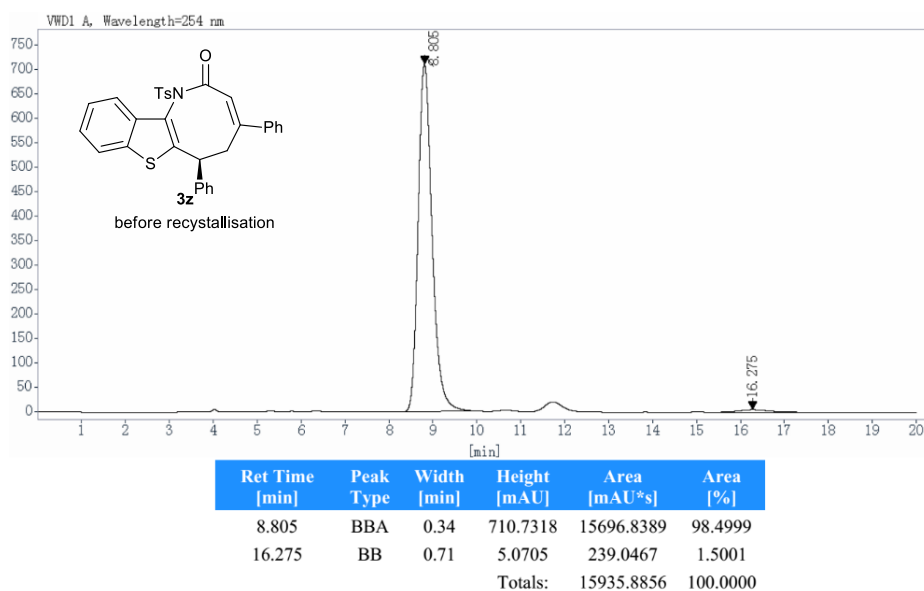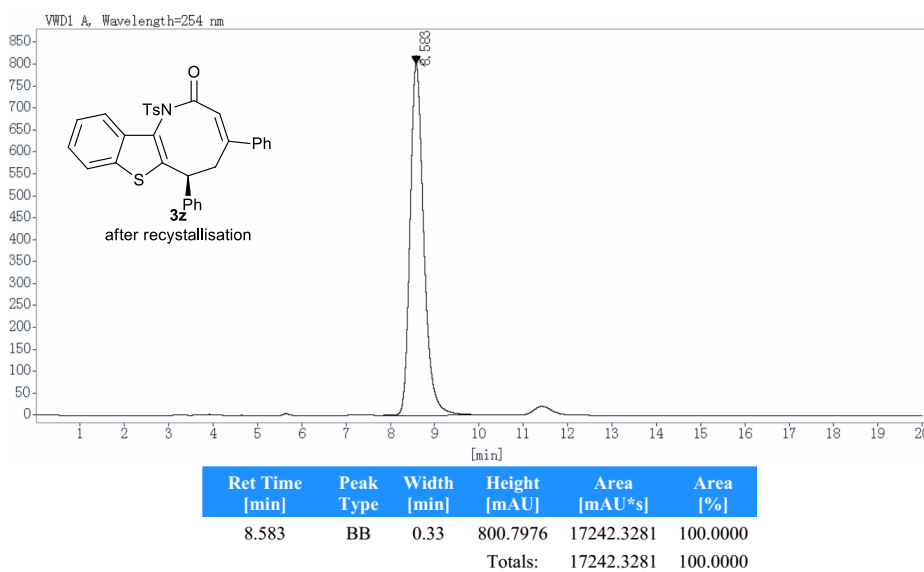

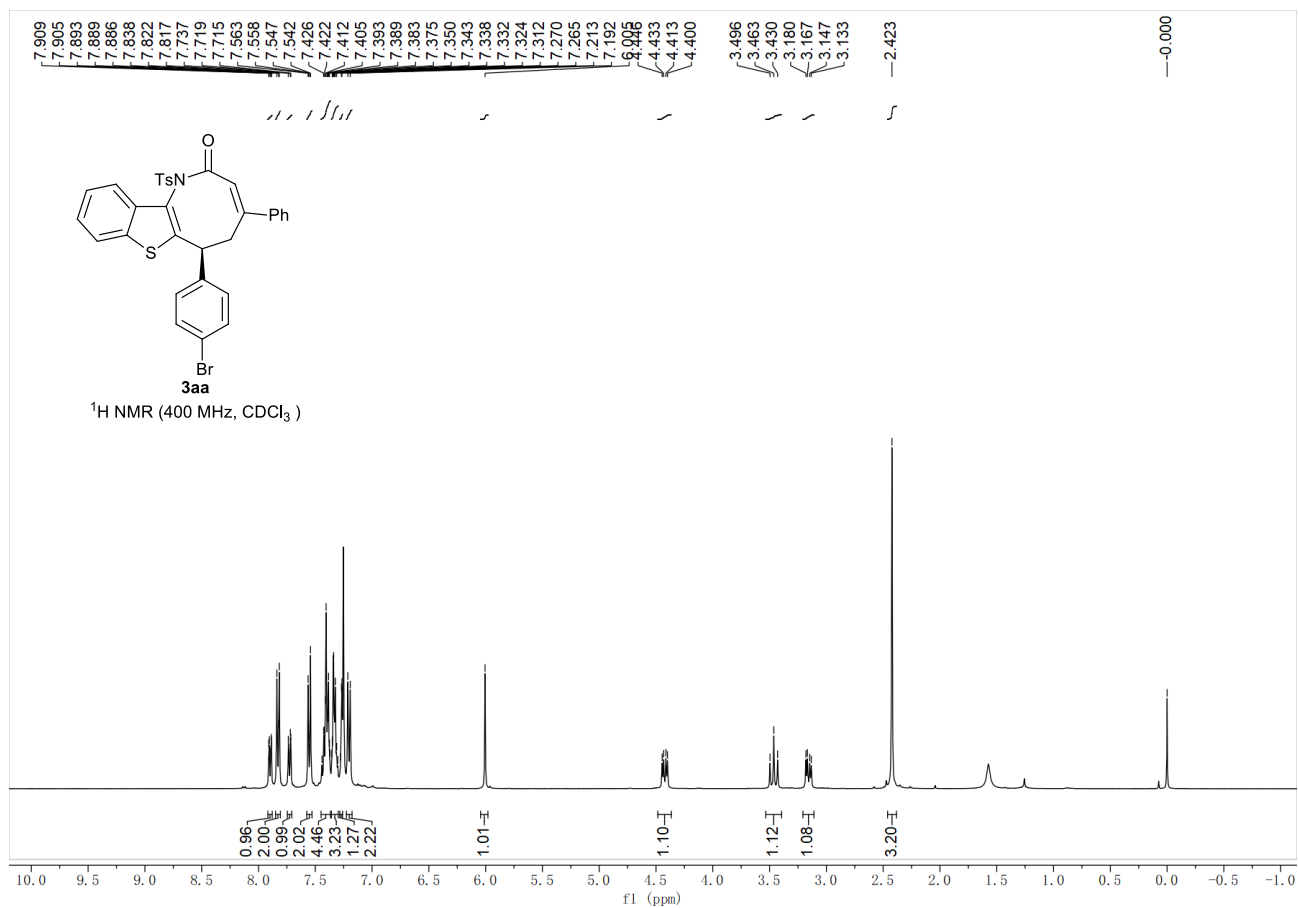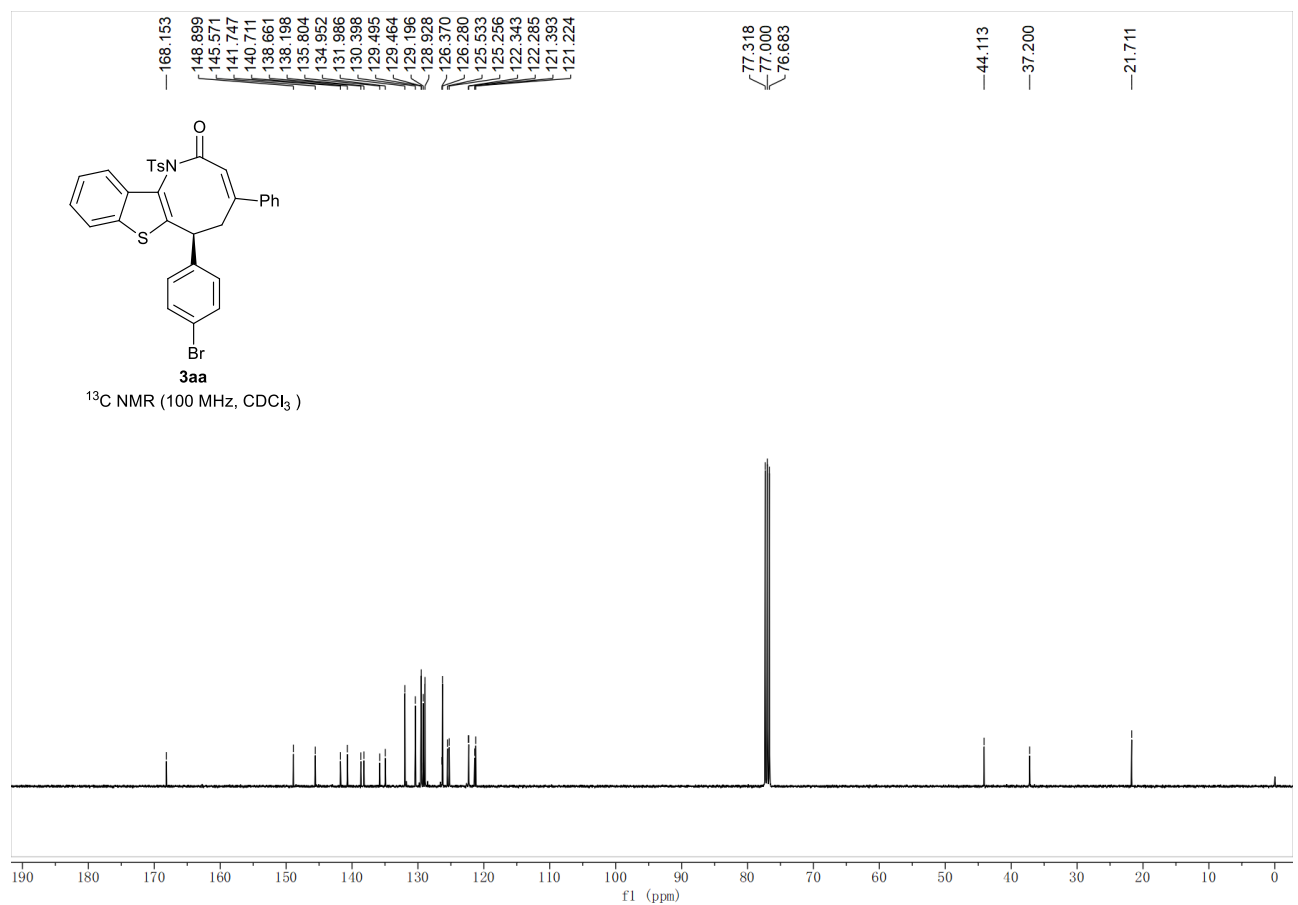

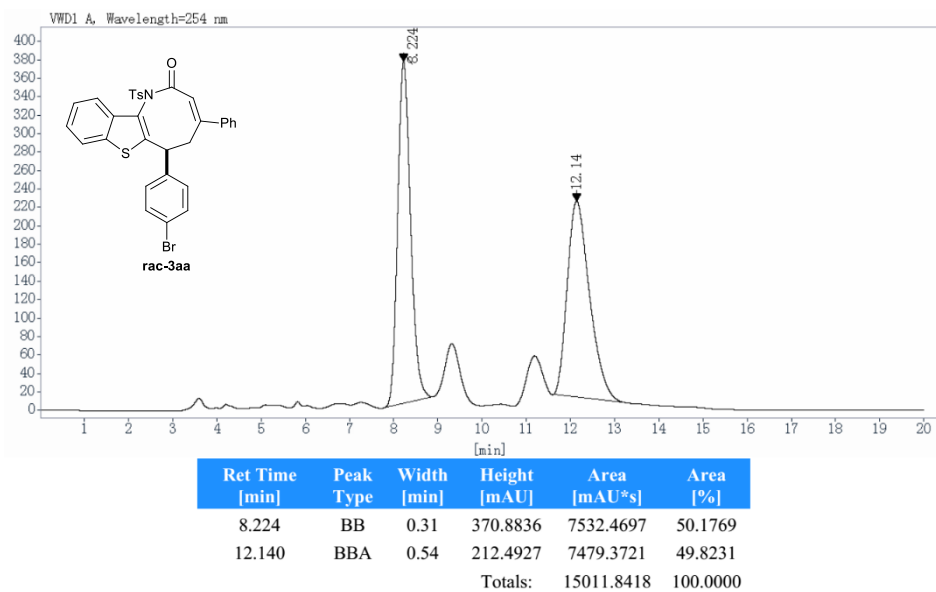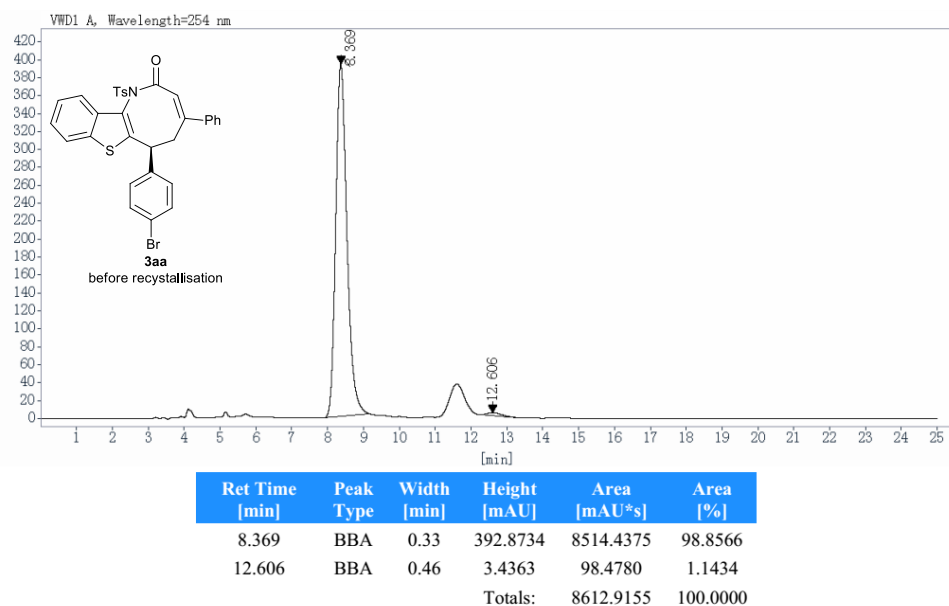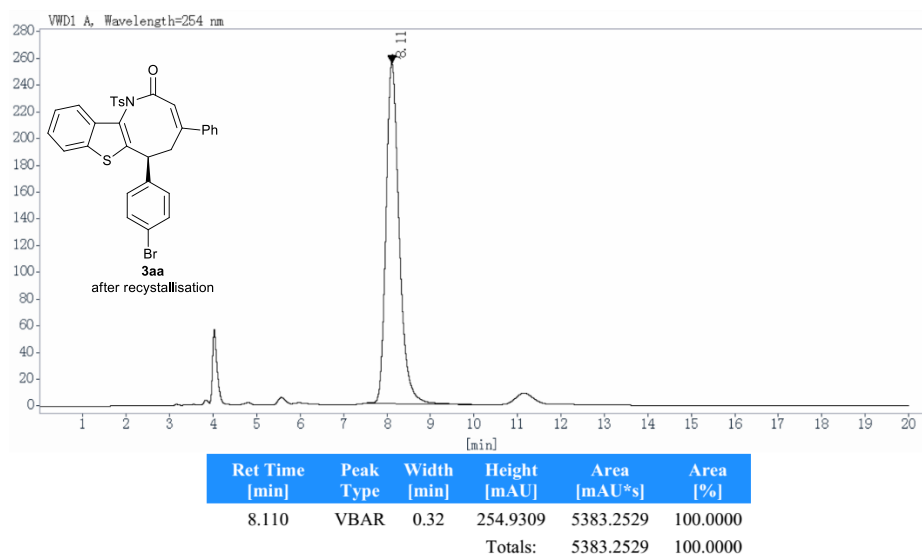

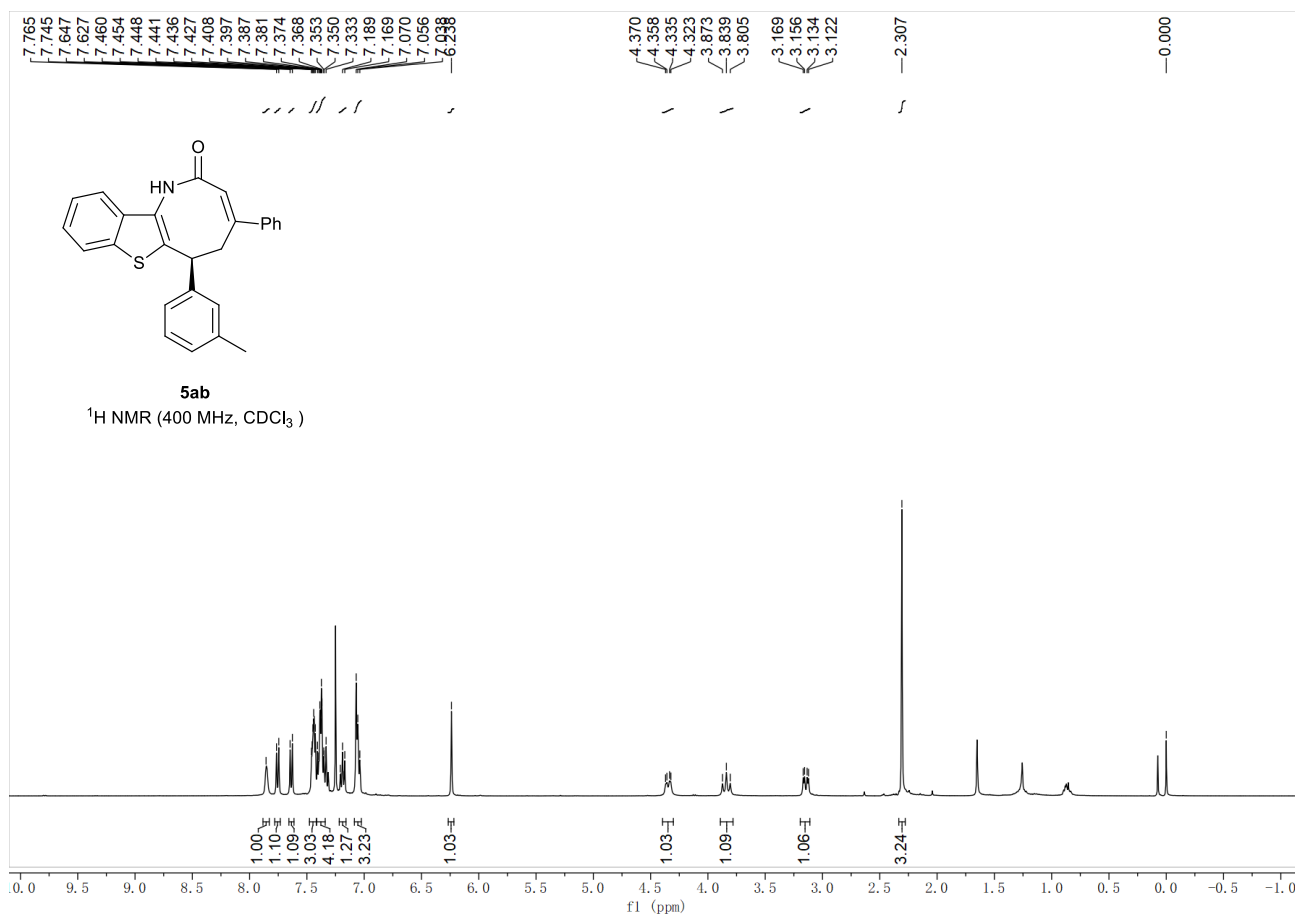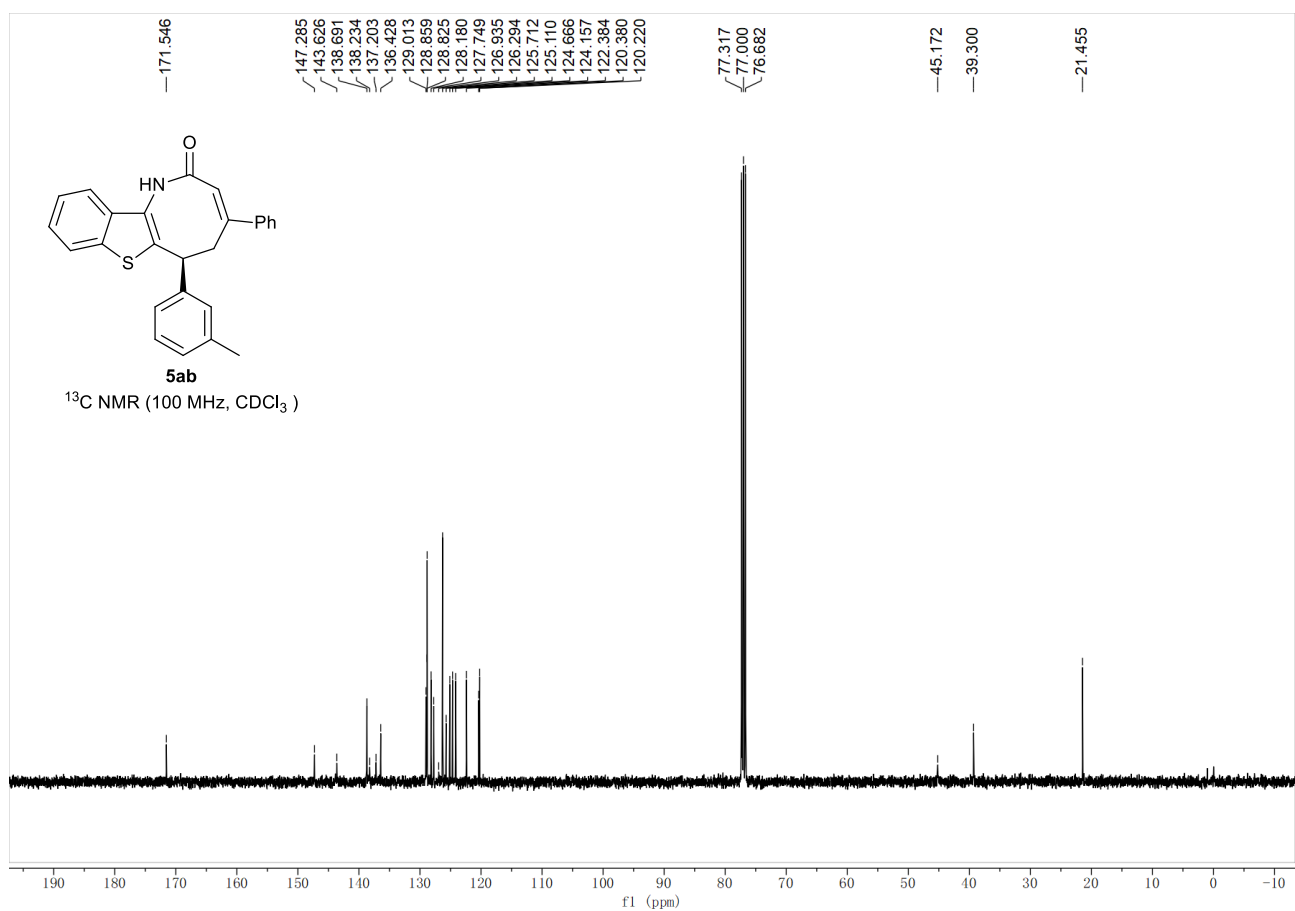



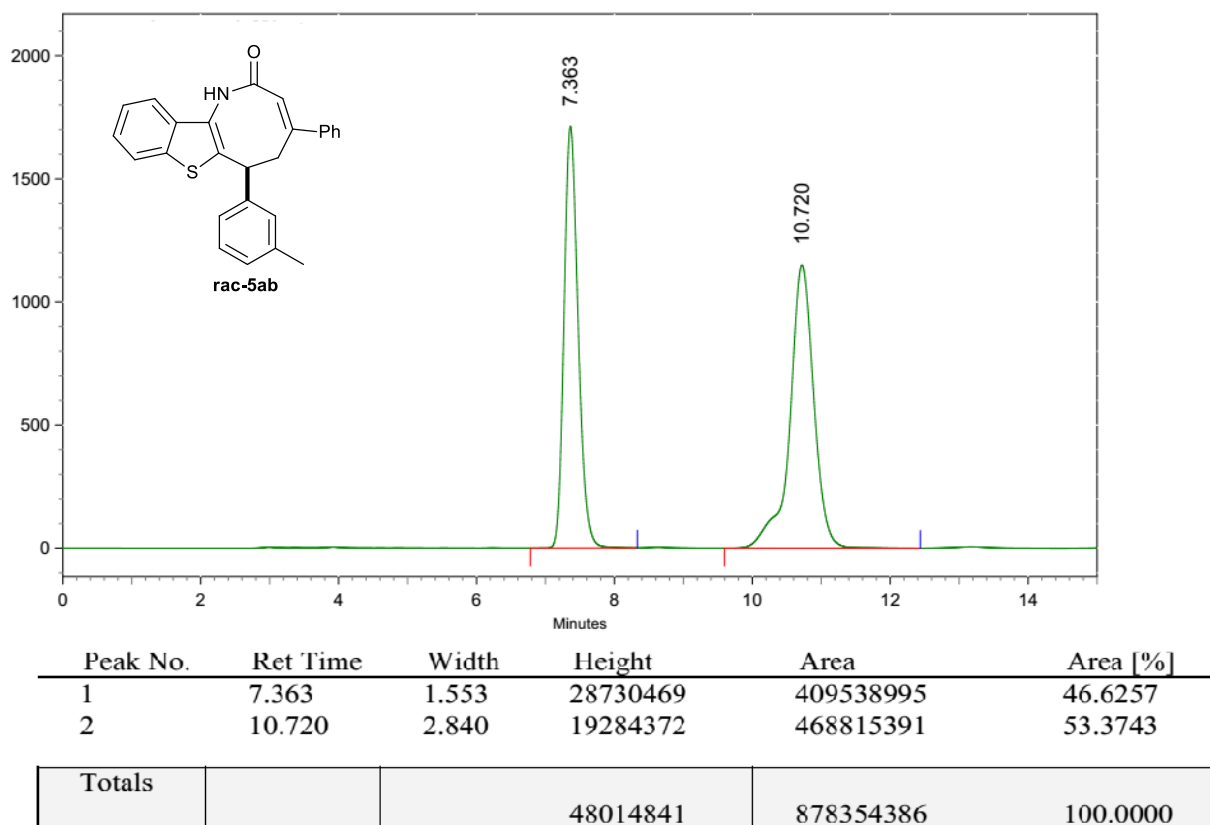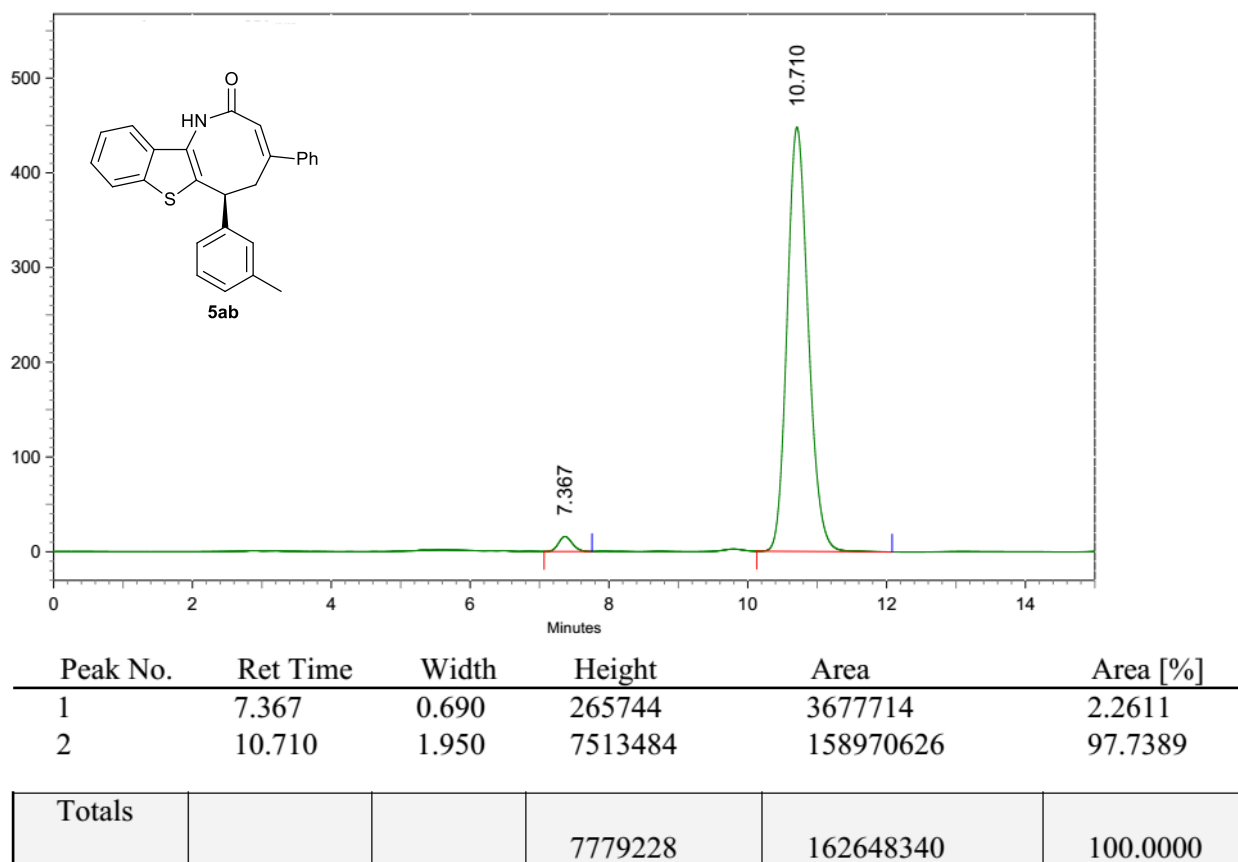

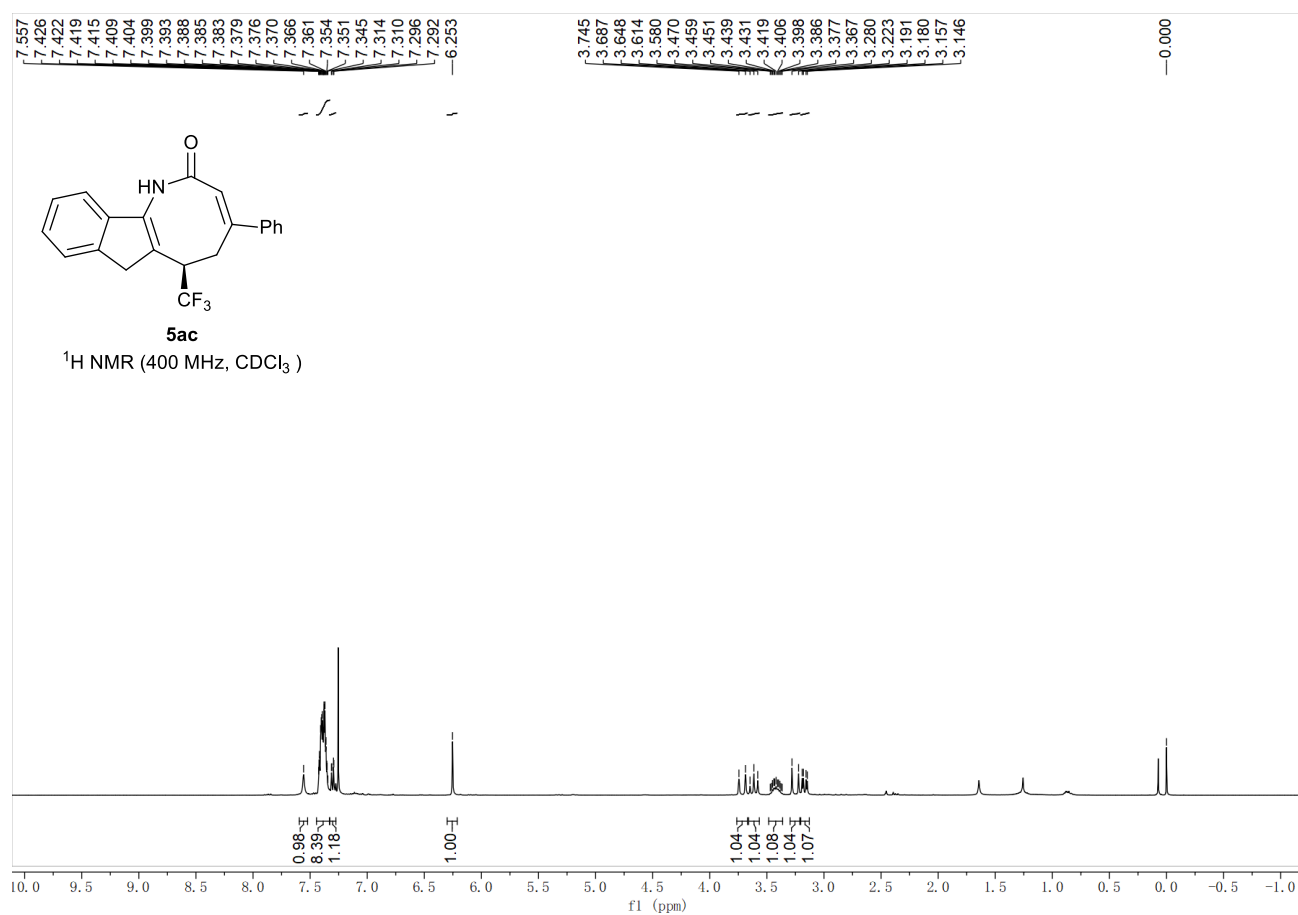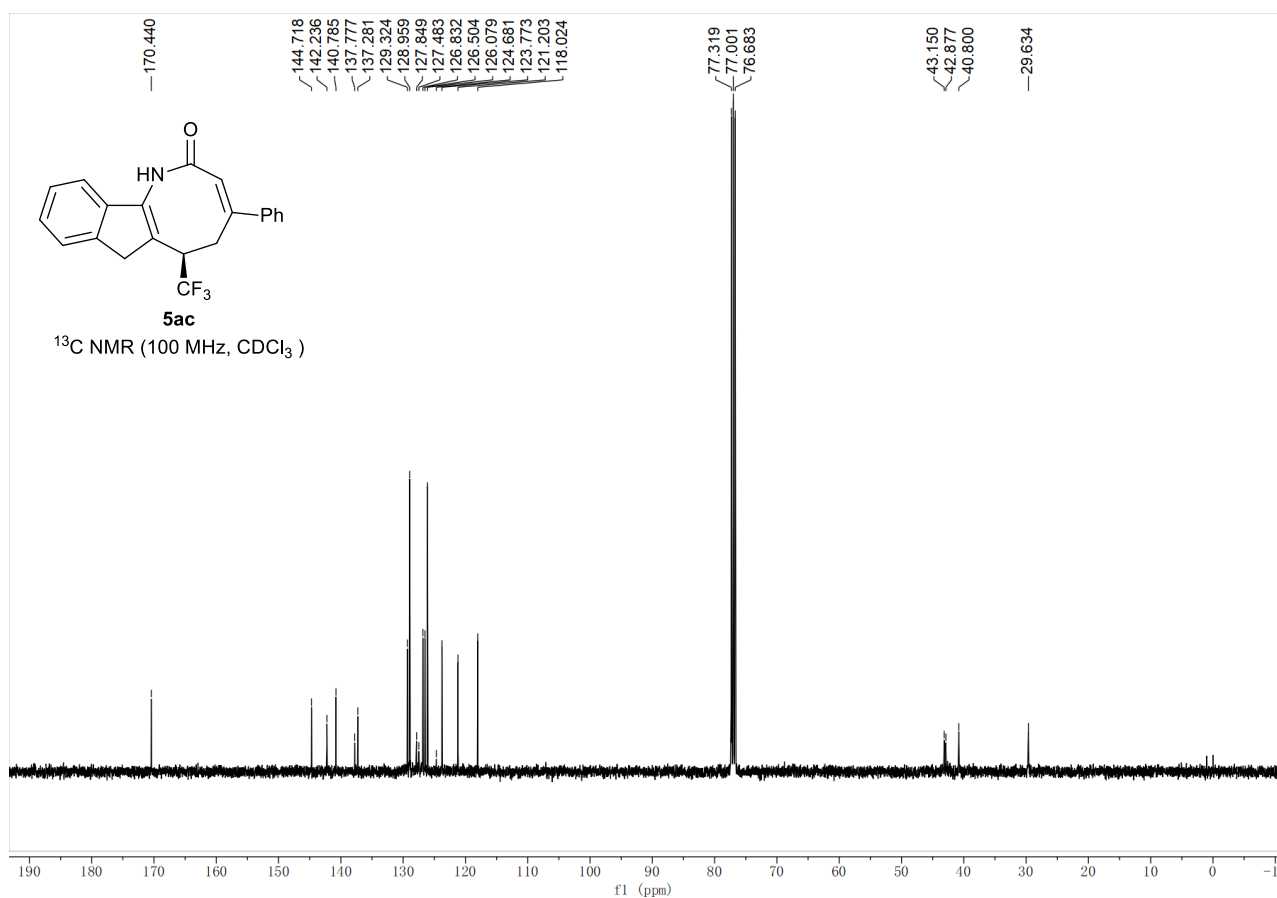

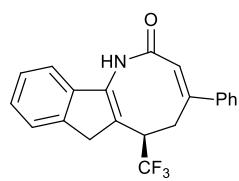

**5ac**

$^{19}\text{F}$  NMR (376 MHz,  $\text{CDCl}_3$ )

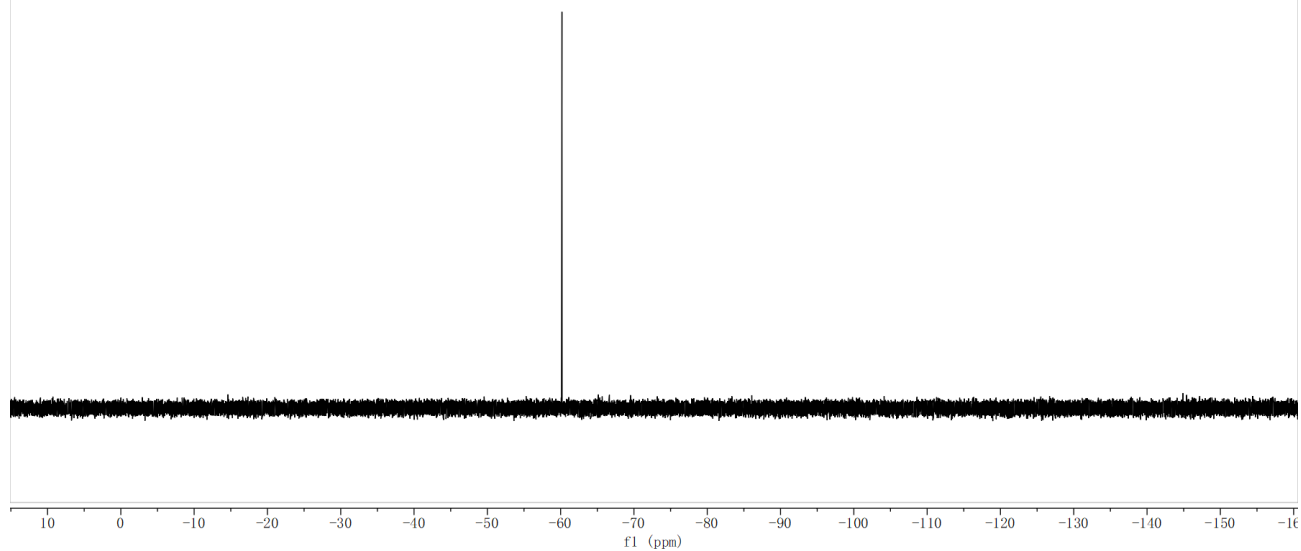

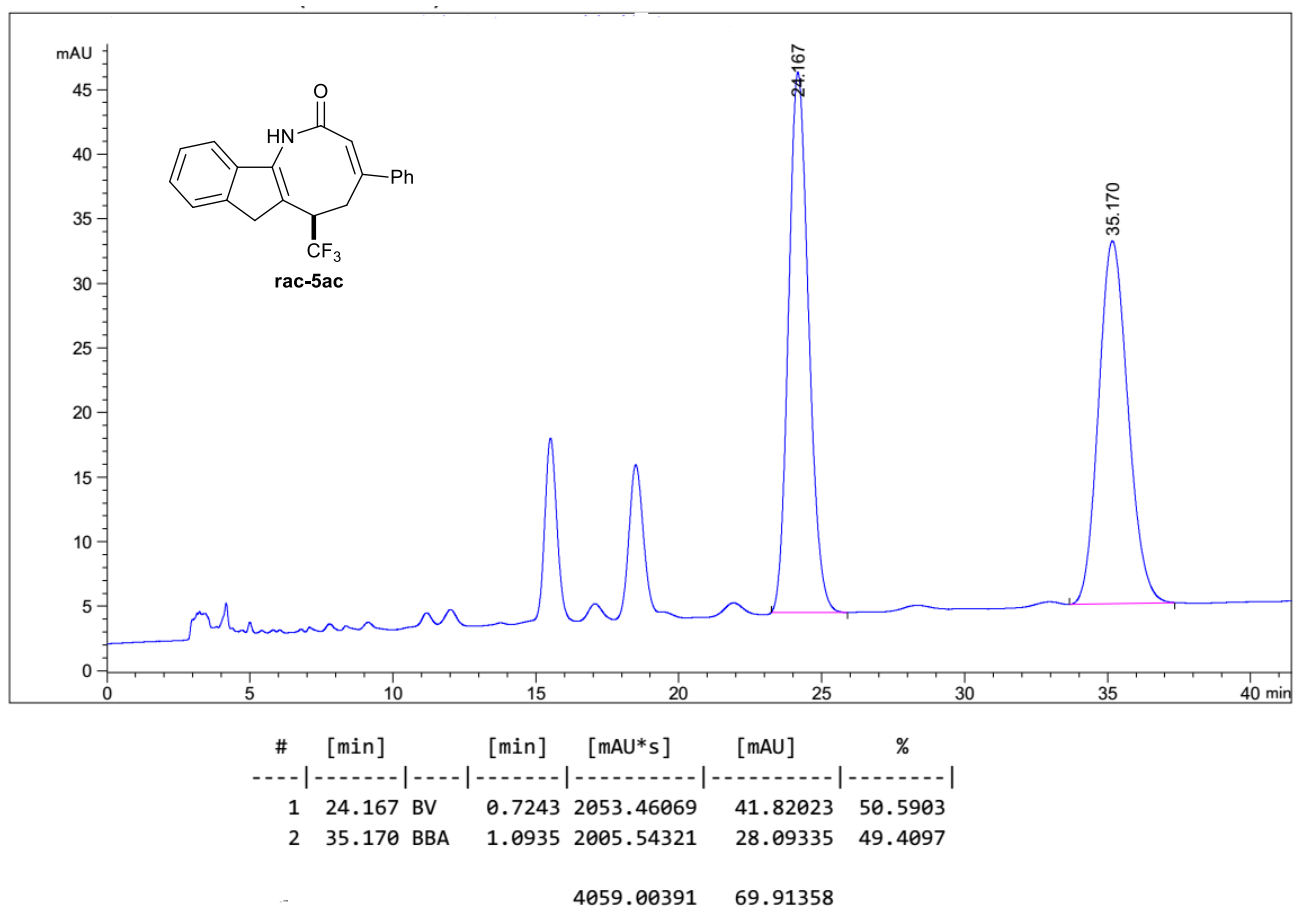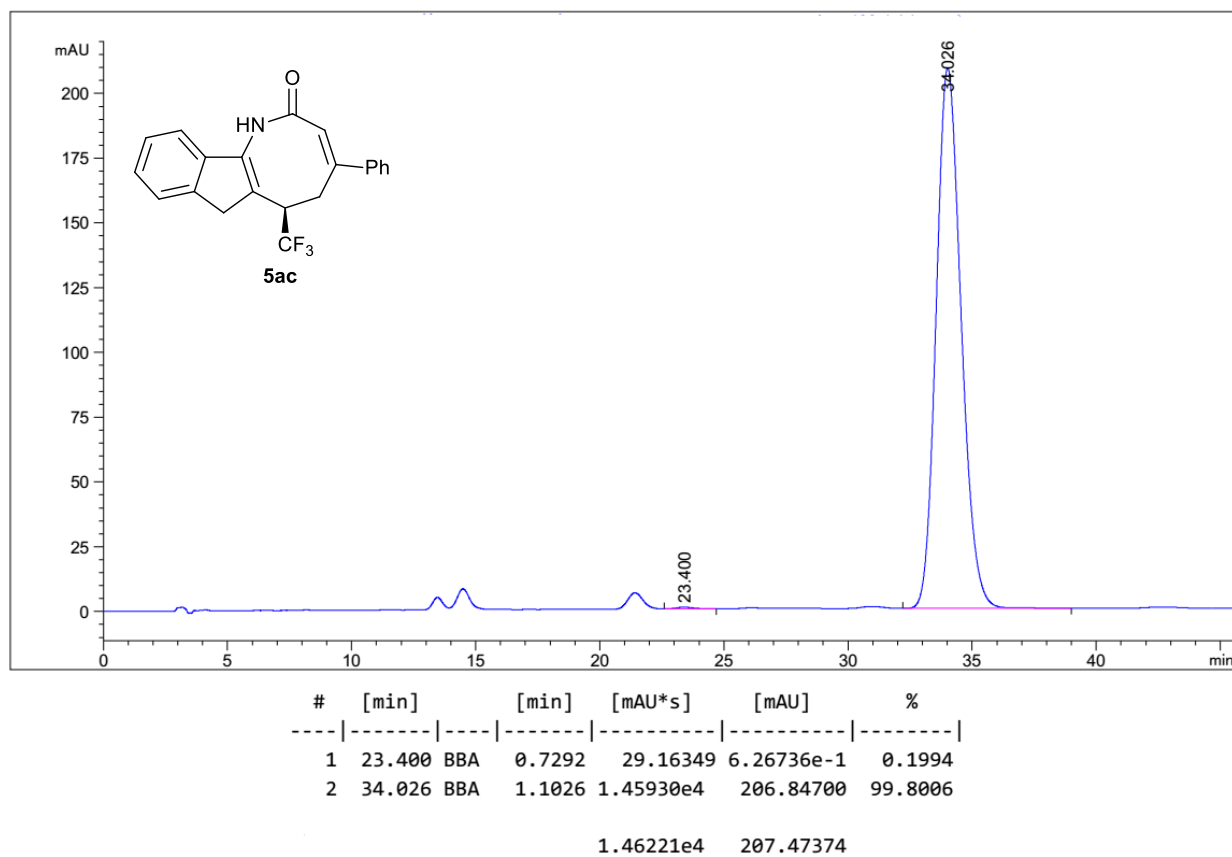

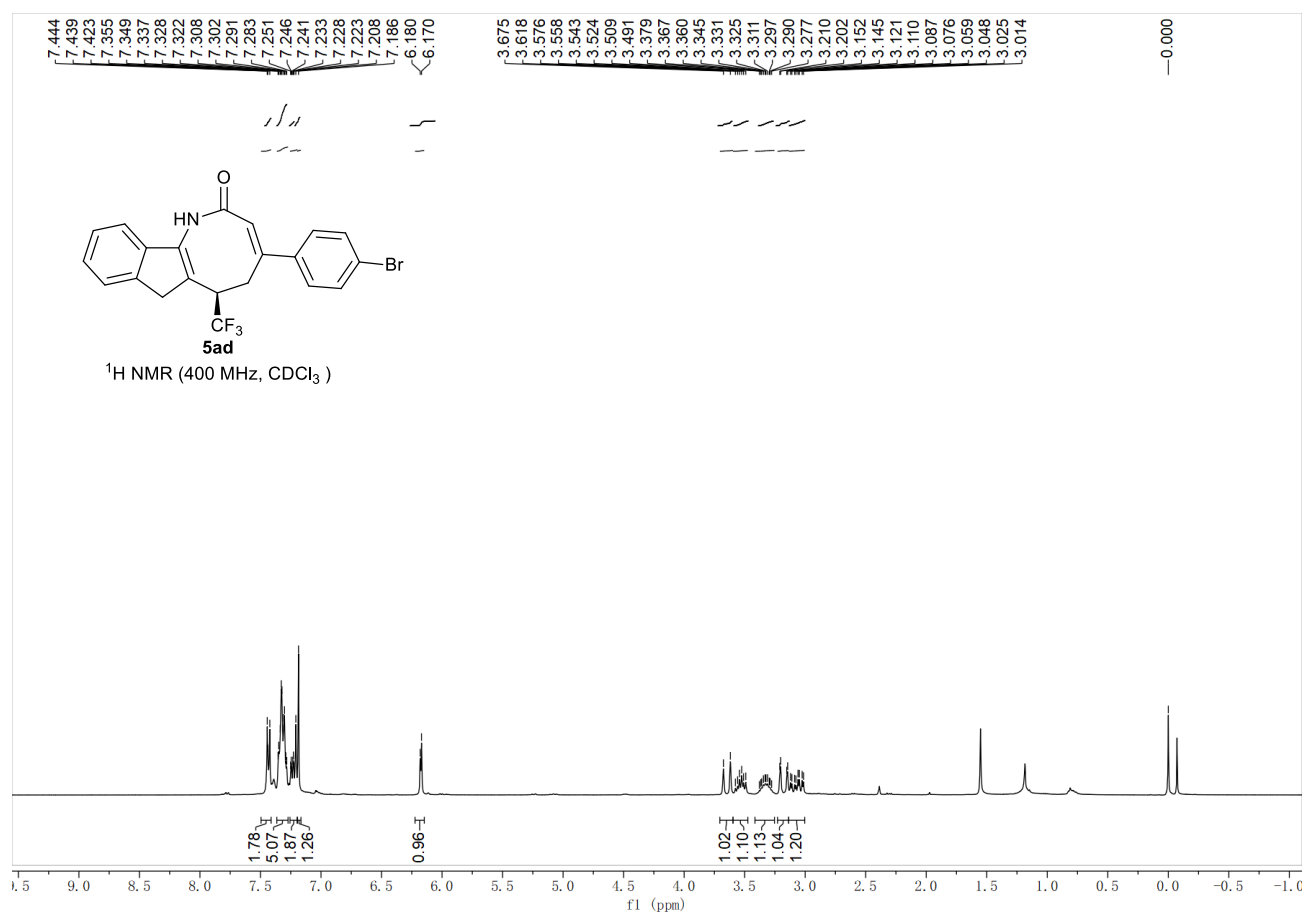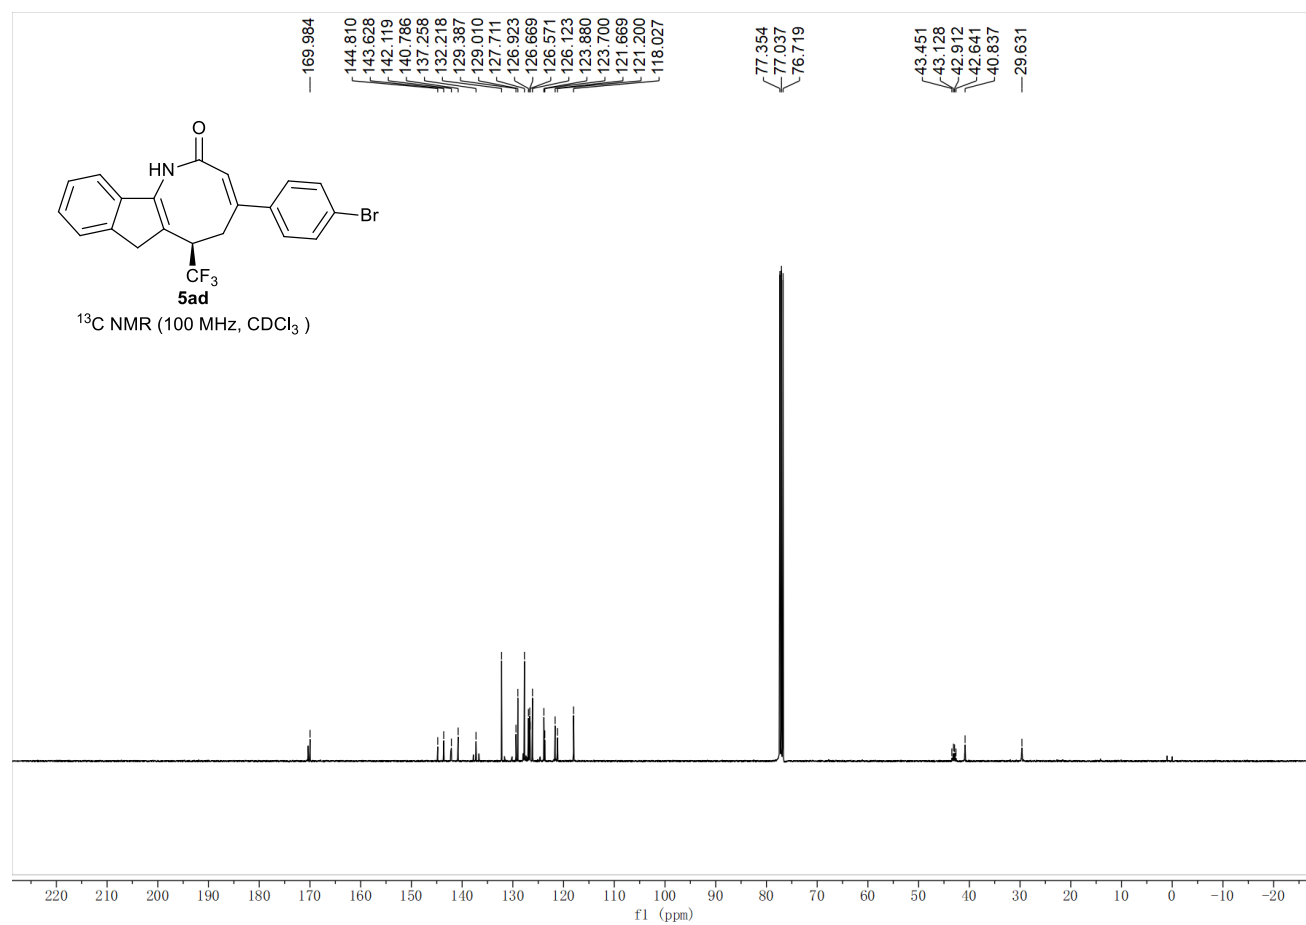

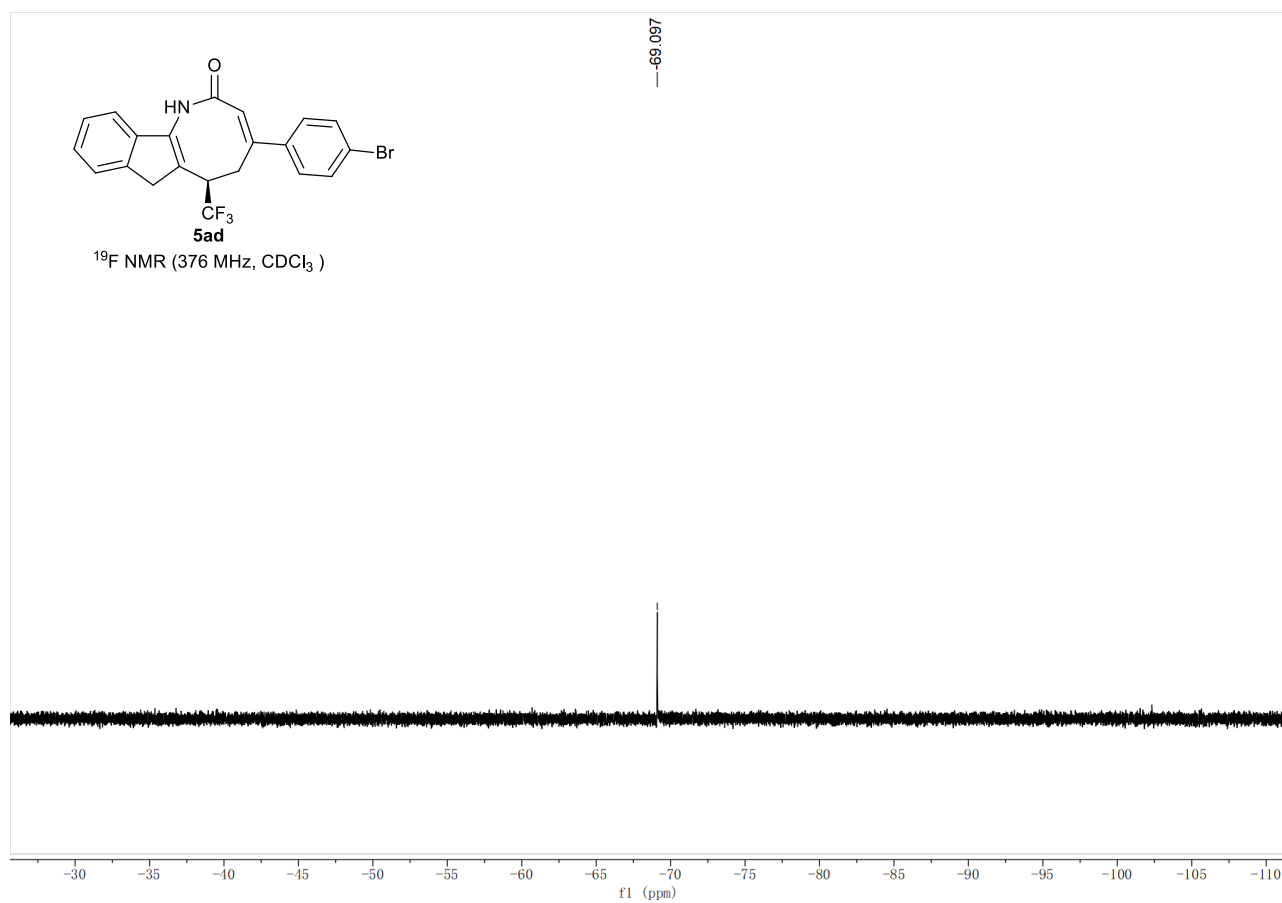

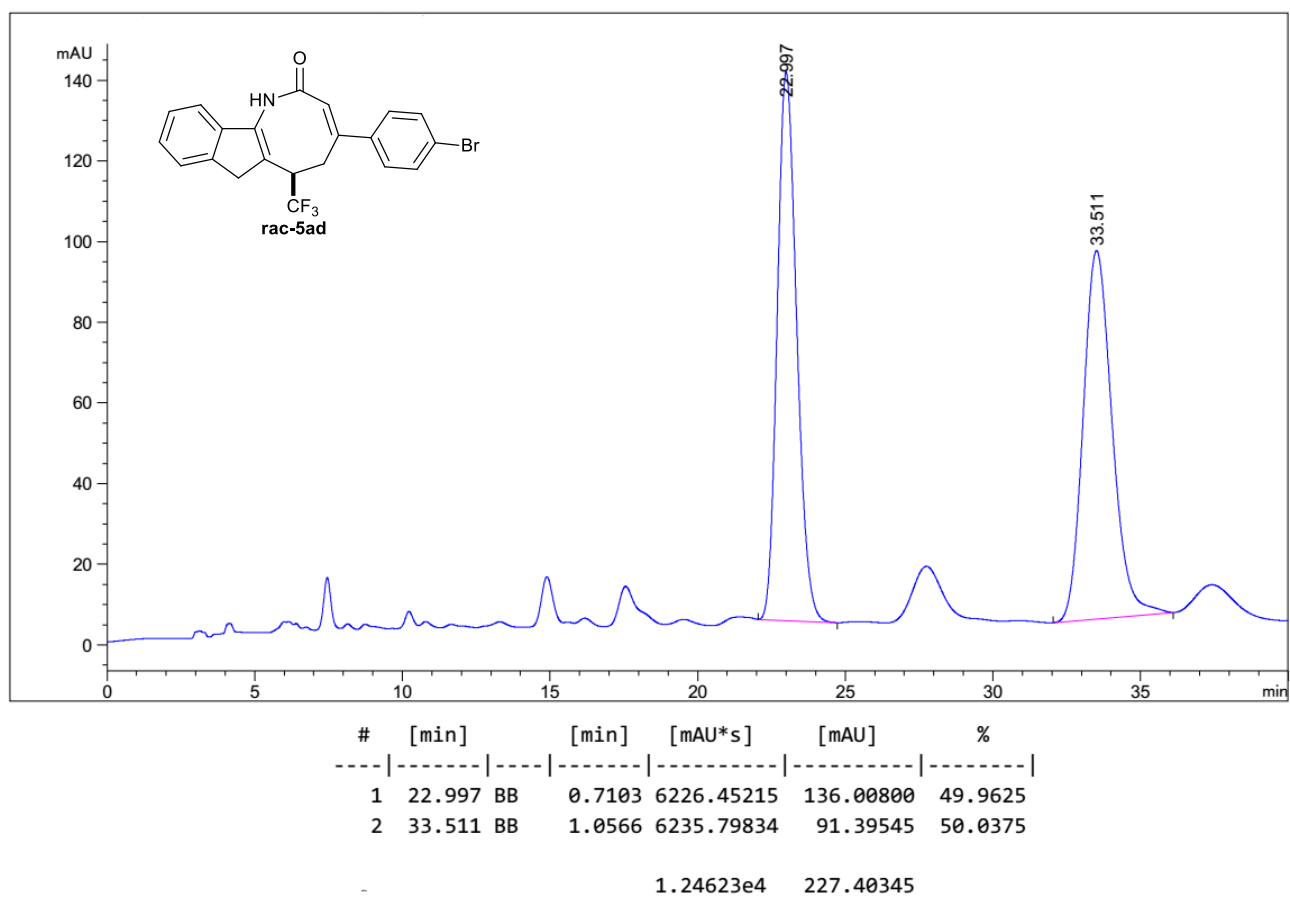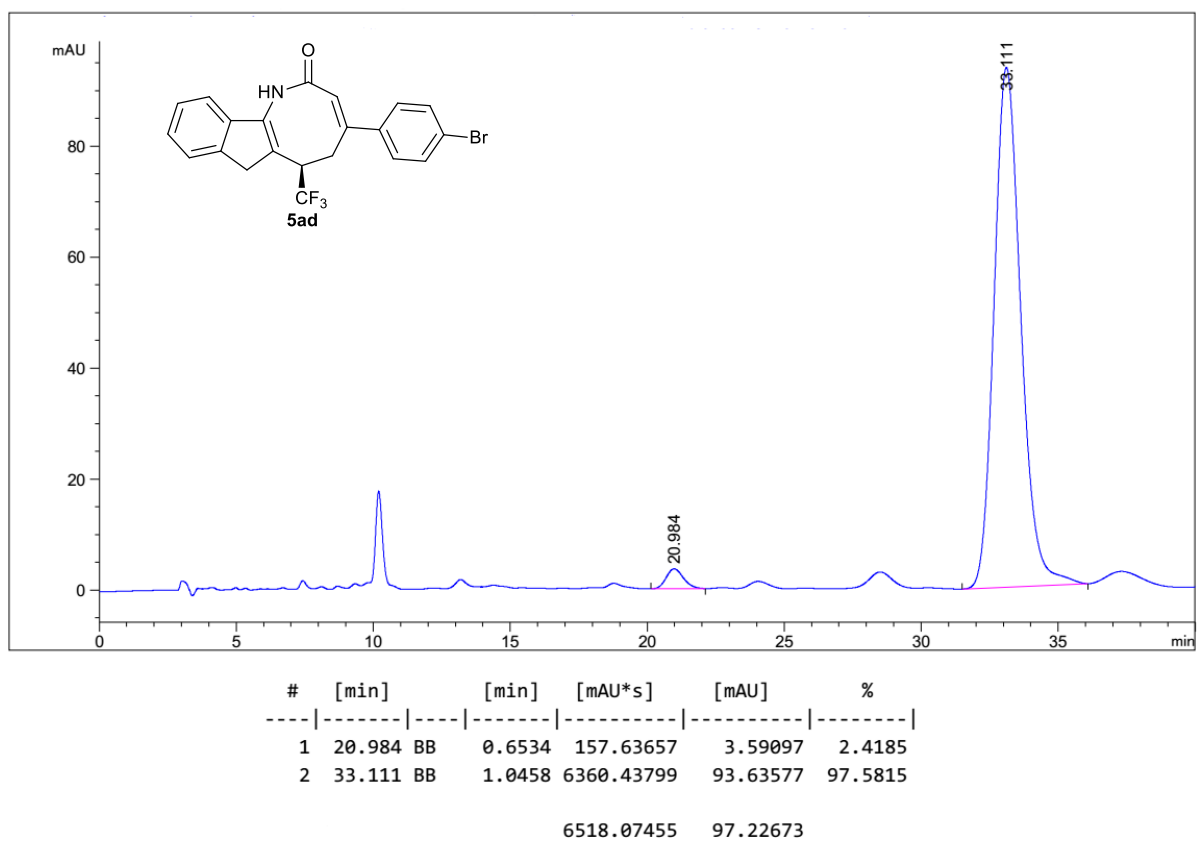

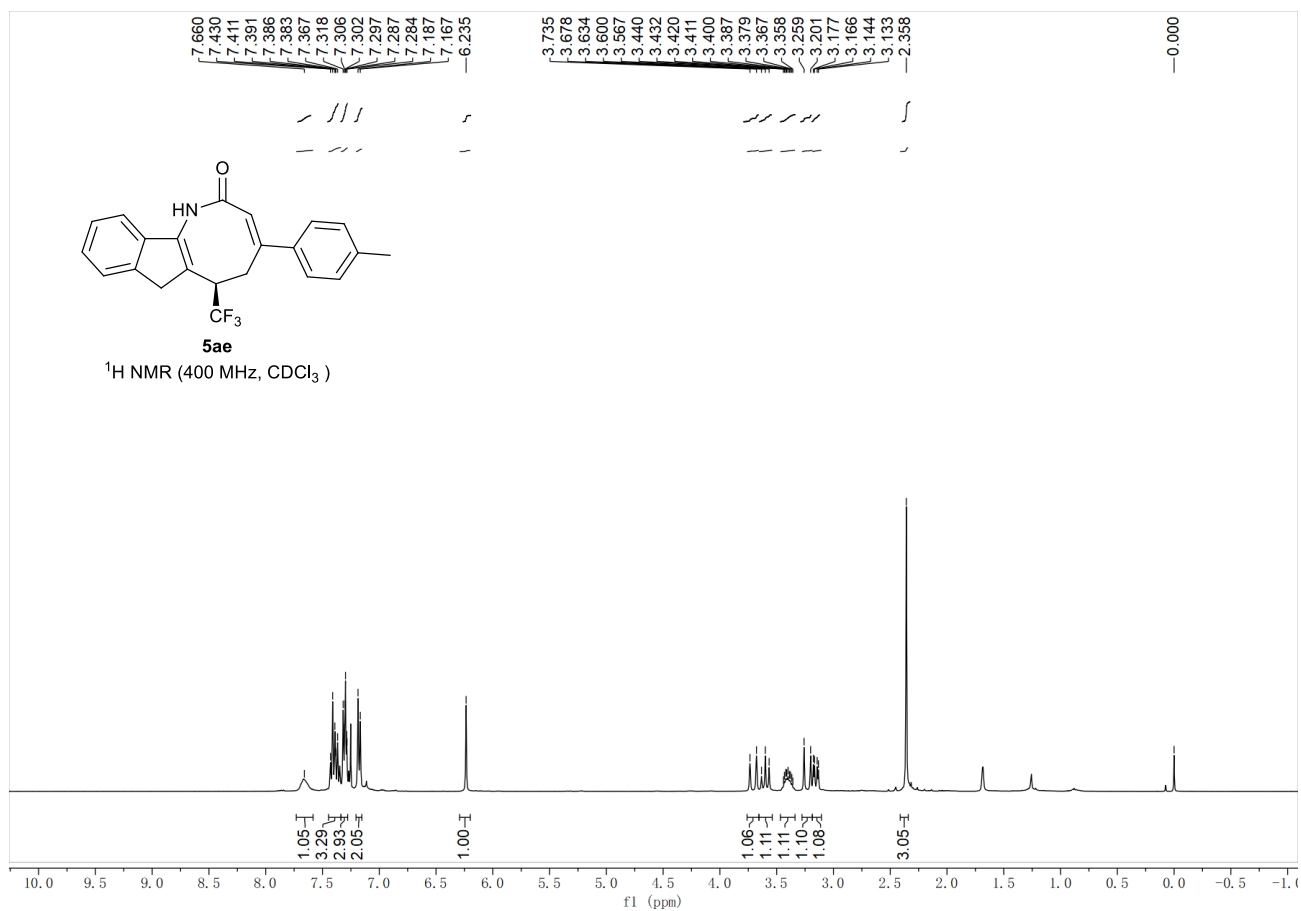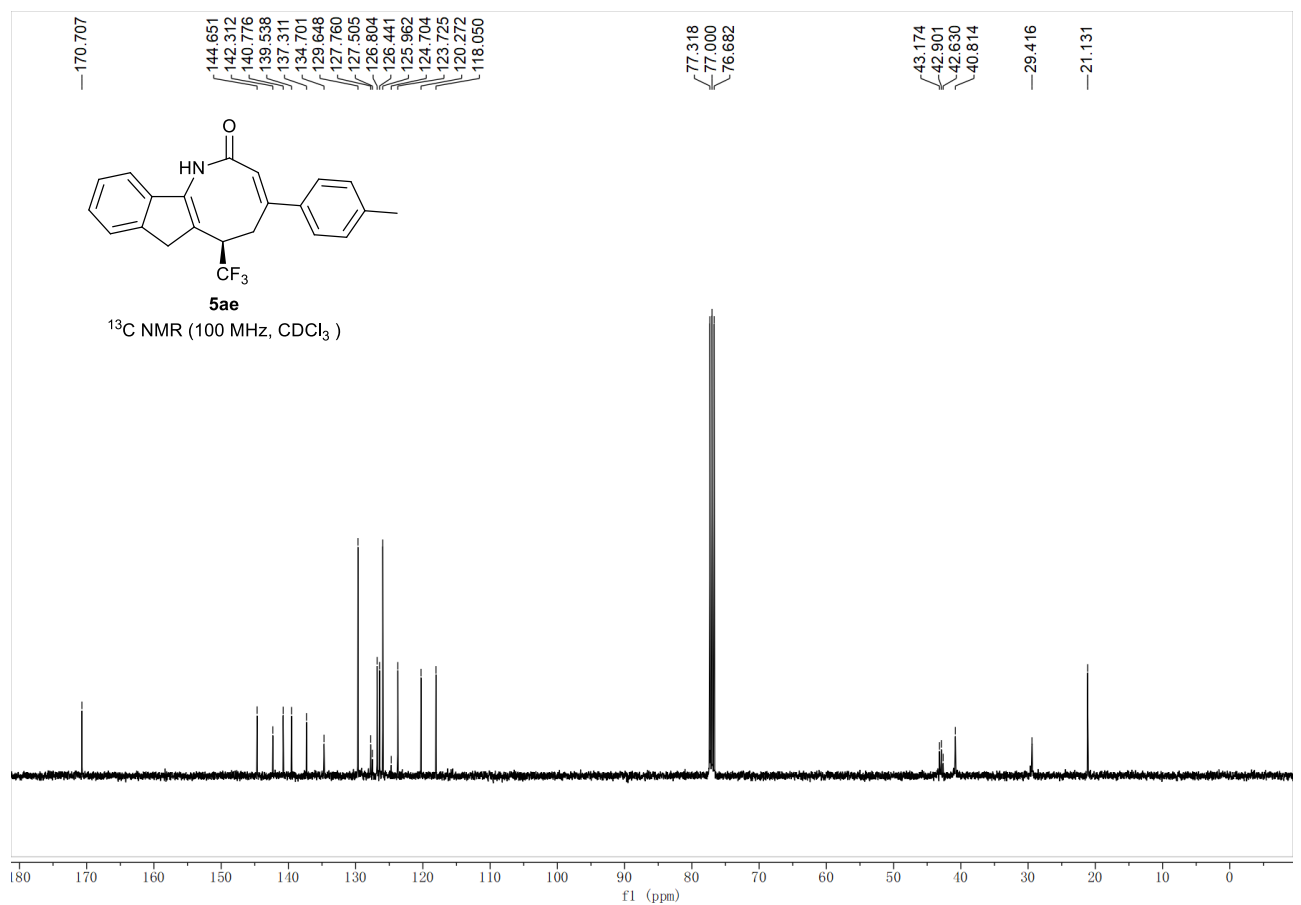



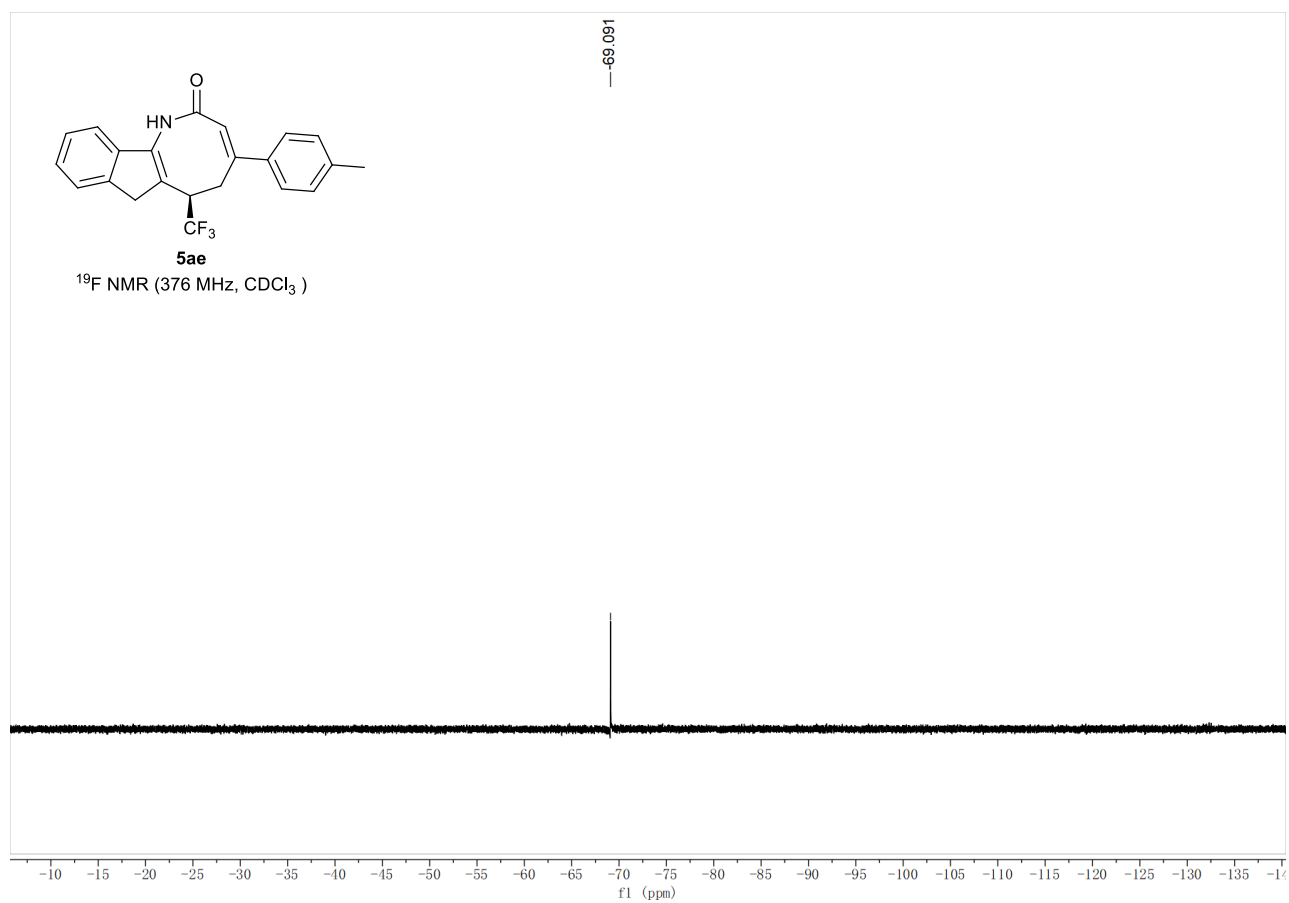

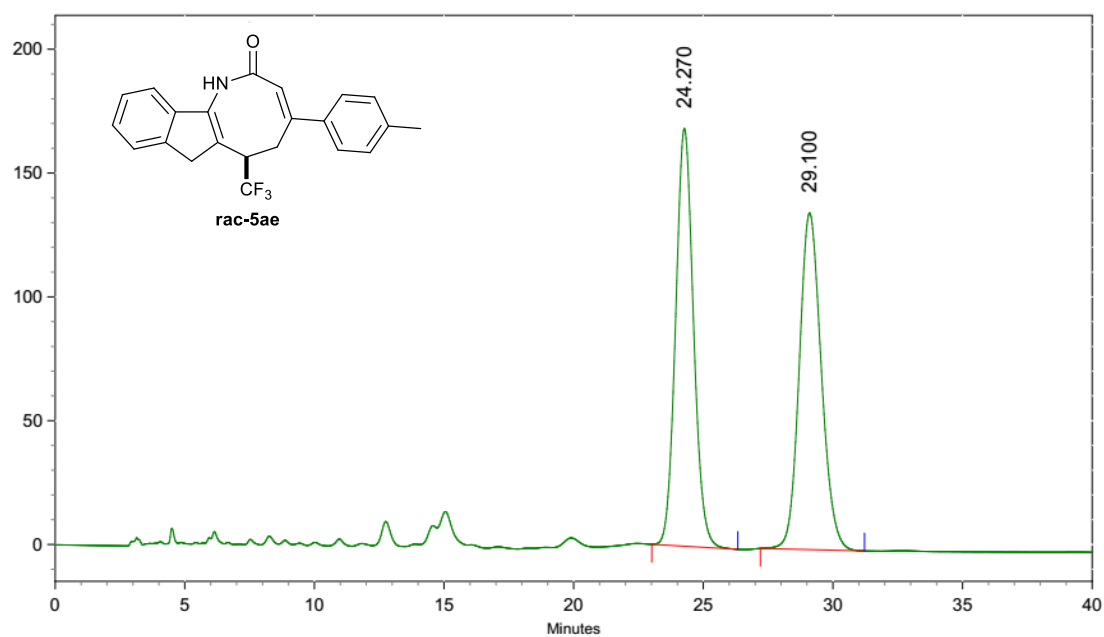

| Peak No. | Ret Time | Width | Height  | Area      | Area [%] |
|----------|----------|-------|---------|-----------|----------|
| 1        | 24.270   | 3.317 | 2830035 | 135308111 | 50.0873  |
| 2        | 29.100   | 4.017 | 2280886 | 134836533 | 49.9127  |

|        |  |  |         |           |          |
|--------|--|--|---------|-----------|----------|
| Totals |  |  | 5110921 | 270144644 | 100.0000 |
|--------|--|--|---------|-----------|----------|

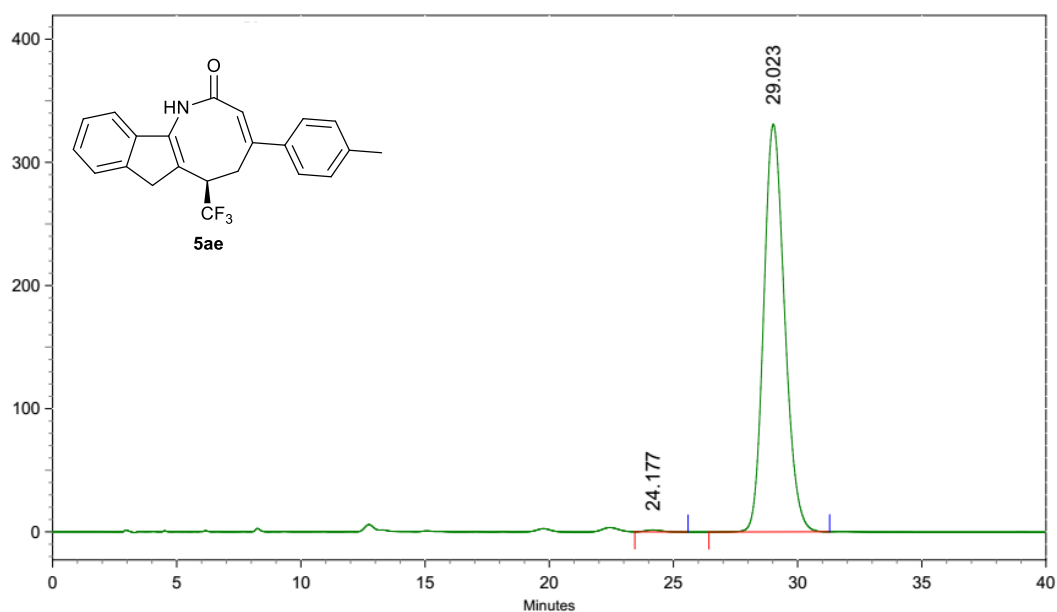

| Peak No. | Ret Time | Width | Height  | Area      | Area [%] |
|----------|----------|-------|---------|-----------|----------|
| 1        | 24.177   | 2.143 | 25113   | 1139108   | 0.3497   |
| 2        | 29.023   | 4.860 | 5553125 | 324592664 | 99.6503  |

|        |  |  |         |           |          |
|--------|--|--|---------|-----------|----------|
| Totals |  |  | 5578238 | 325731772 | 100.0000 |
|--------|--|--|---------|-----------|----------|

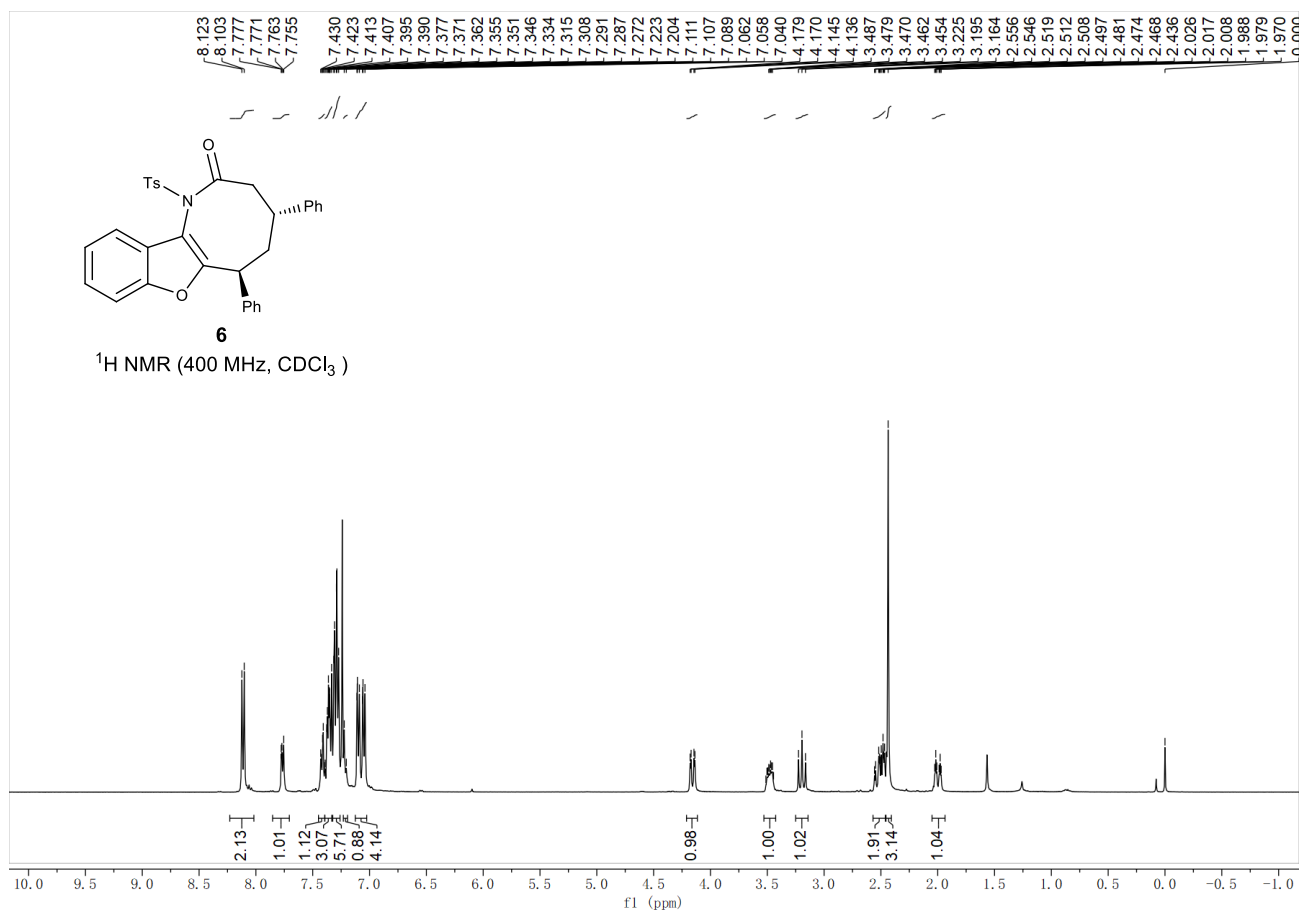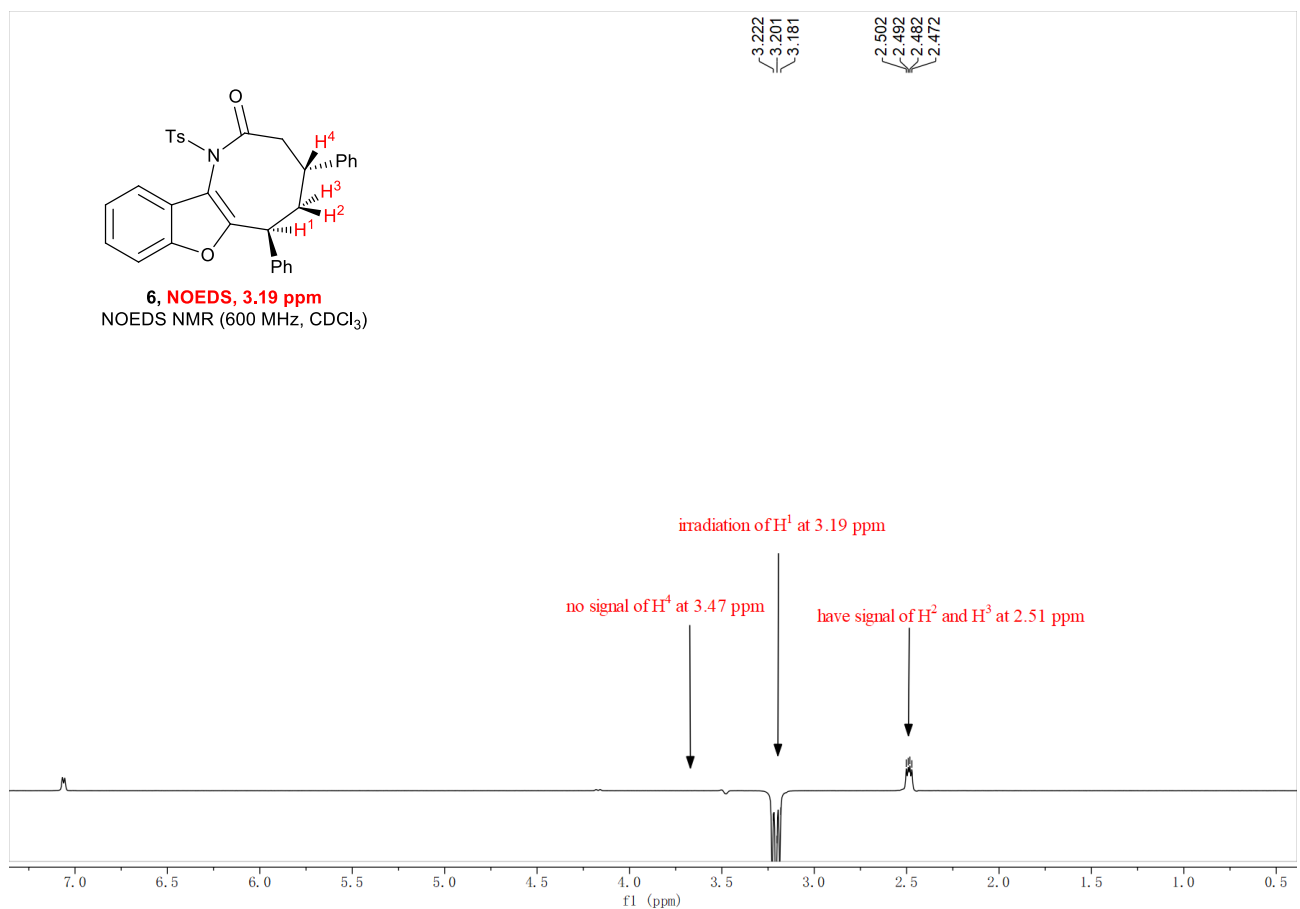

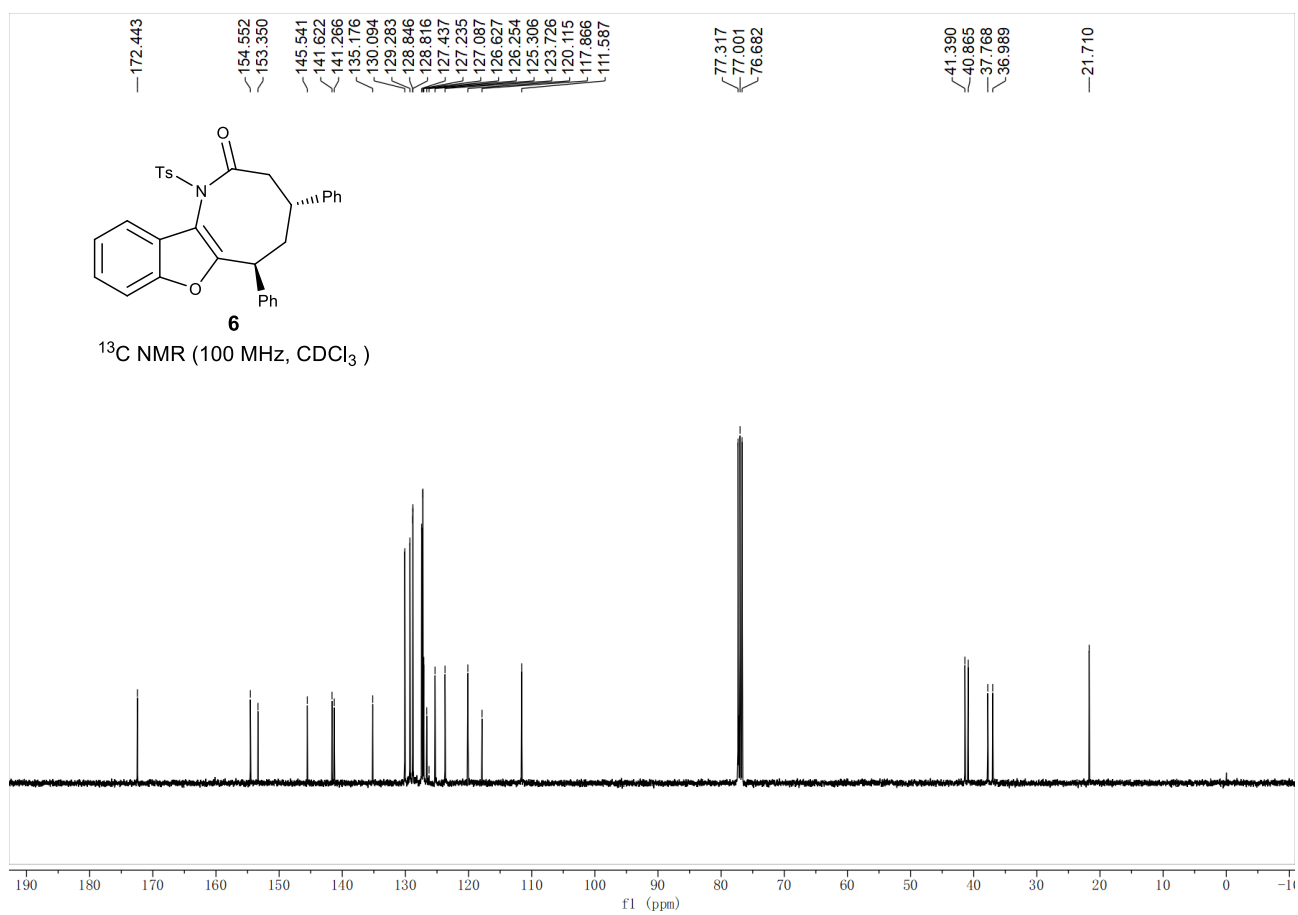

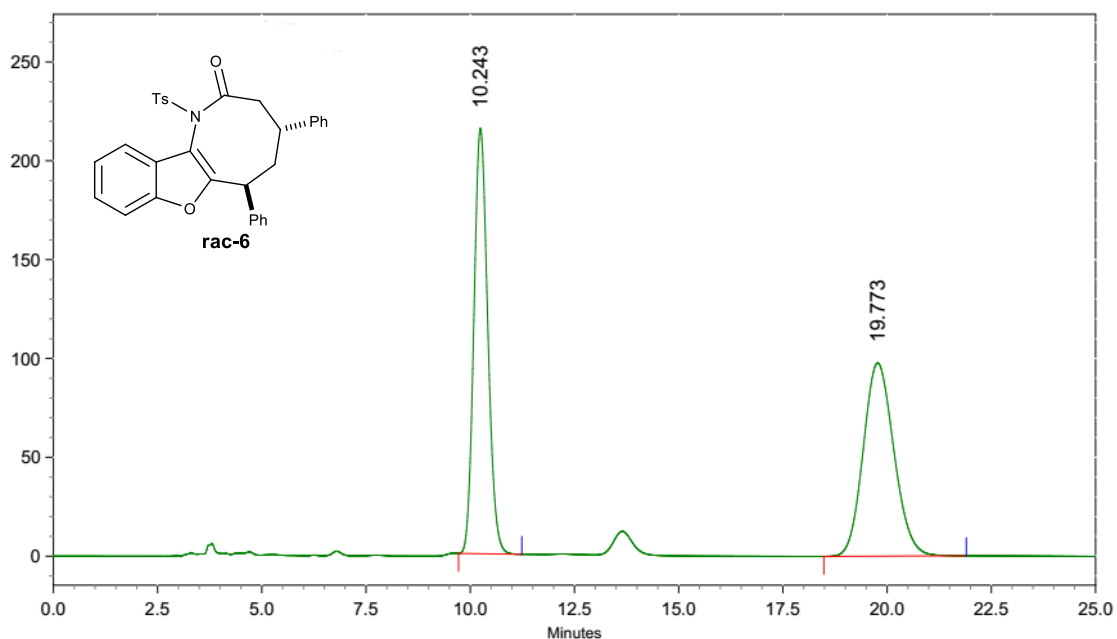

| Peak No. | Ret Time | Width | Height  | Area     | Area [%] |
|----------|----------|-------|---------|----------|----------|
| 1        | 10.243   | 1.517 | 3609774 | 83344887 | 49.8282  |
| 2        | 19.773   | 3.417 | 1639757 | 83919444 | 50.1718  |

|        |  |  |         |           |          |
|--------|--|--|---------|-----------|----------|
| Totals |  |  | 5249531 | 167264331 | 100.0000 |
|--------|--|--|---------|-----------|----------|

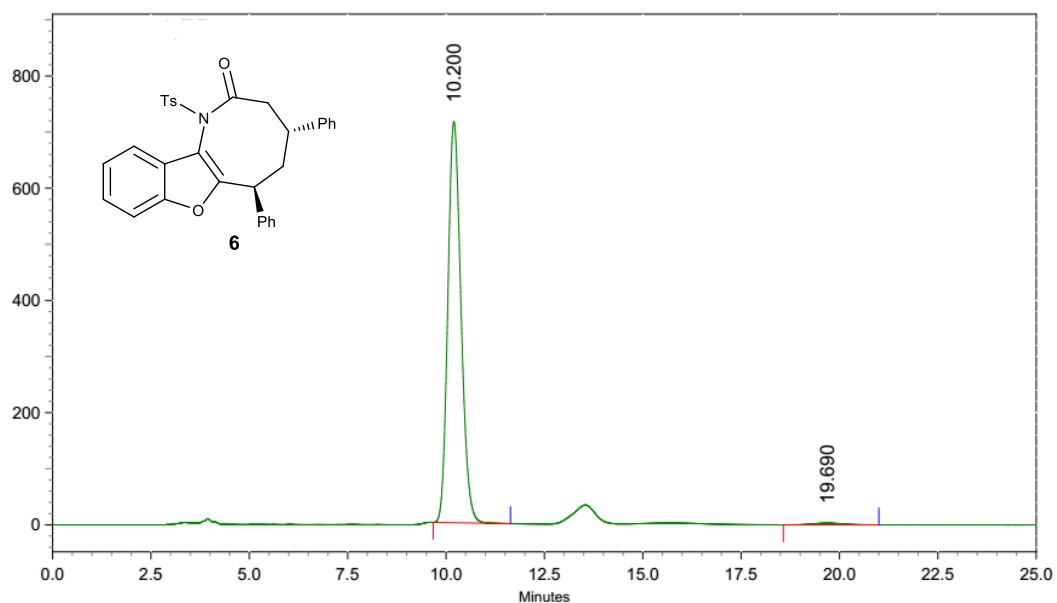

| Peak No. | Ret Time | Width | Height   | Area      | Area [%] |
|----------|----------|-------|----------|-----------|----------|
| 1        | 10.200   | 1.963 | 11994157 | 278490106 | 99.0605  |
| 2        | 19.690   | 2.427 | 52789    | 2641244   | 0.9395   |

|        |  |  |          |           |          |
|--------|--|--|----------|-----------|----------|
| Totals |  |  | 12046946 | 281131350 | 100.0000 |
|--------|--|--|----------|-----------|----------|

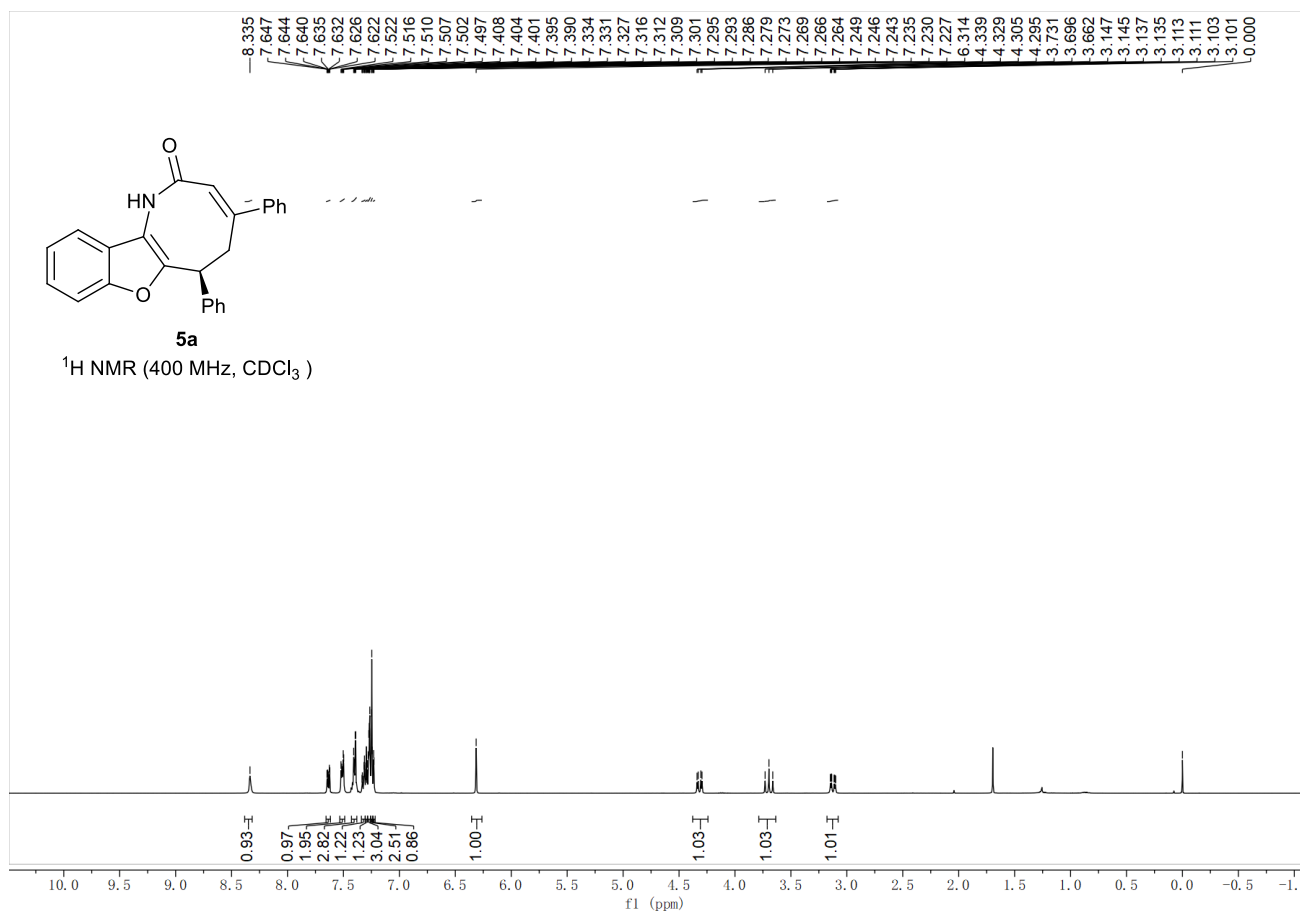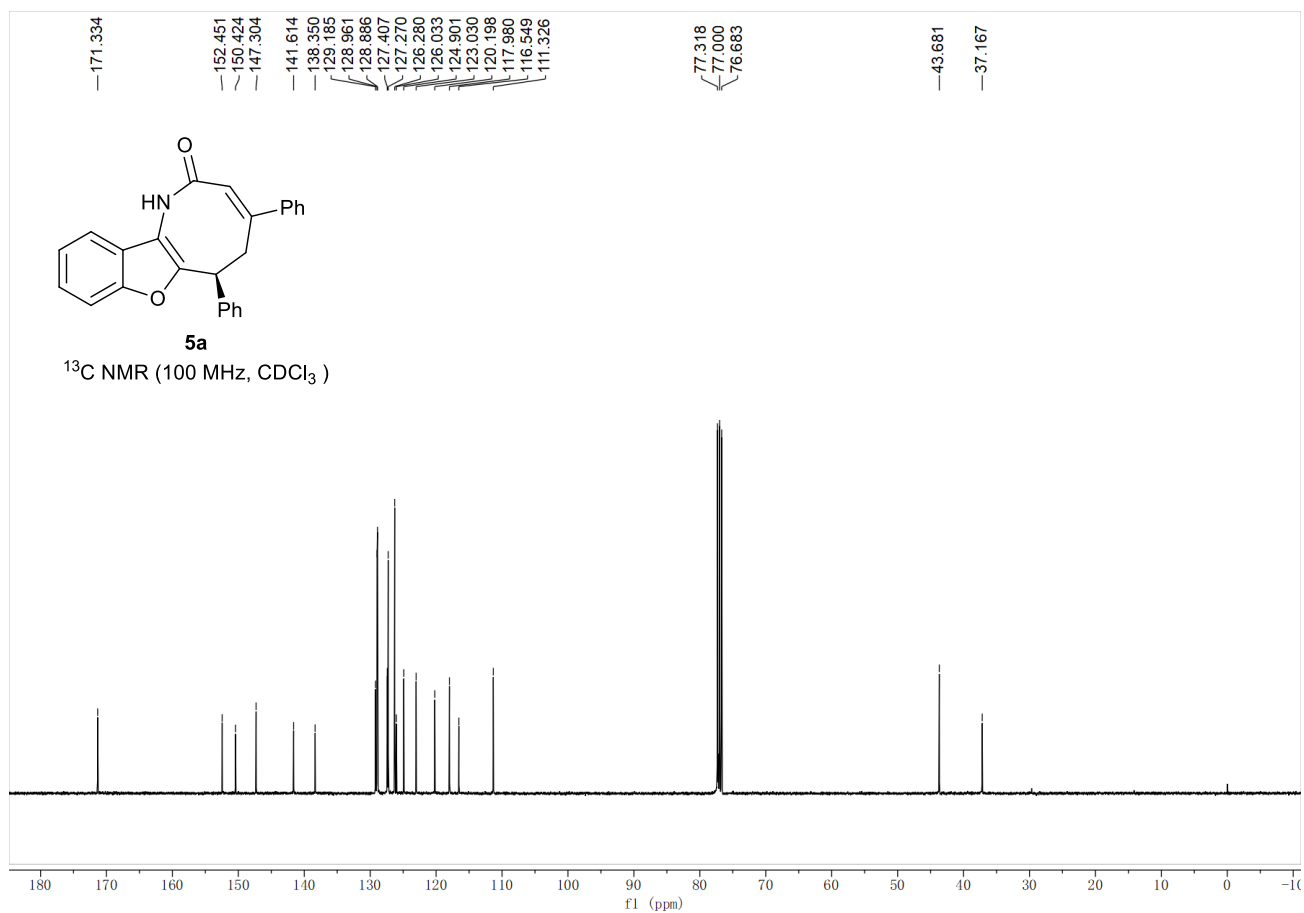

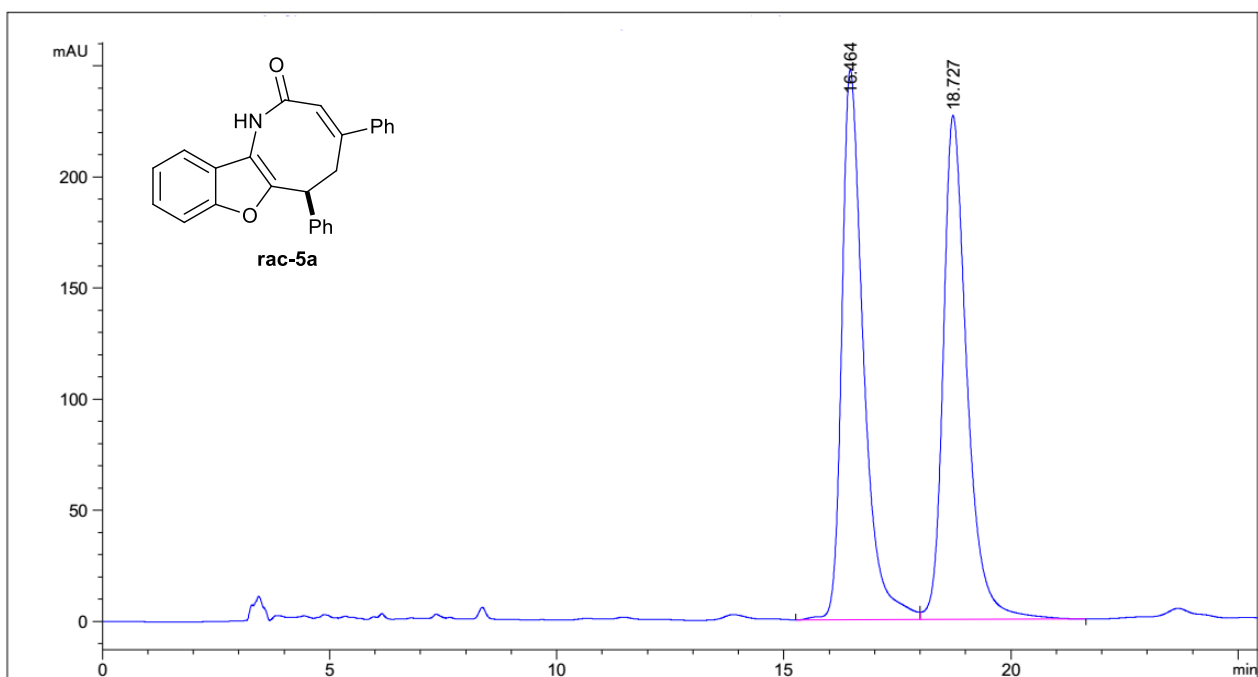

| # | [min]  |    | [min]  | [mAU*s]    | [mAU]     | %       |
|---|--------|----|--------|------------|-----------|---------|
| 1 | 16.464 | BV | 0.4988 | 8240.23047 | 247.67259 | 49.9546 |
| 2 | 18.727 | VB | 0.5468 | 8255.20703 | 226.89015 | 50.0454 |
|   |        |    |        | 1.64954e4  | 474.56274 |         |

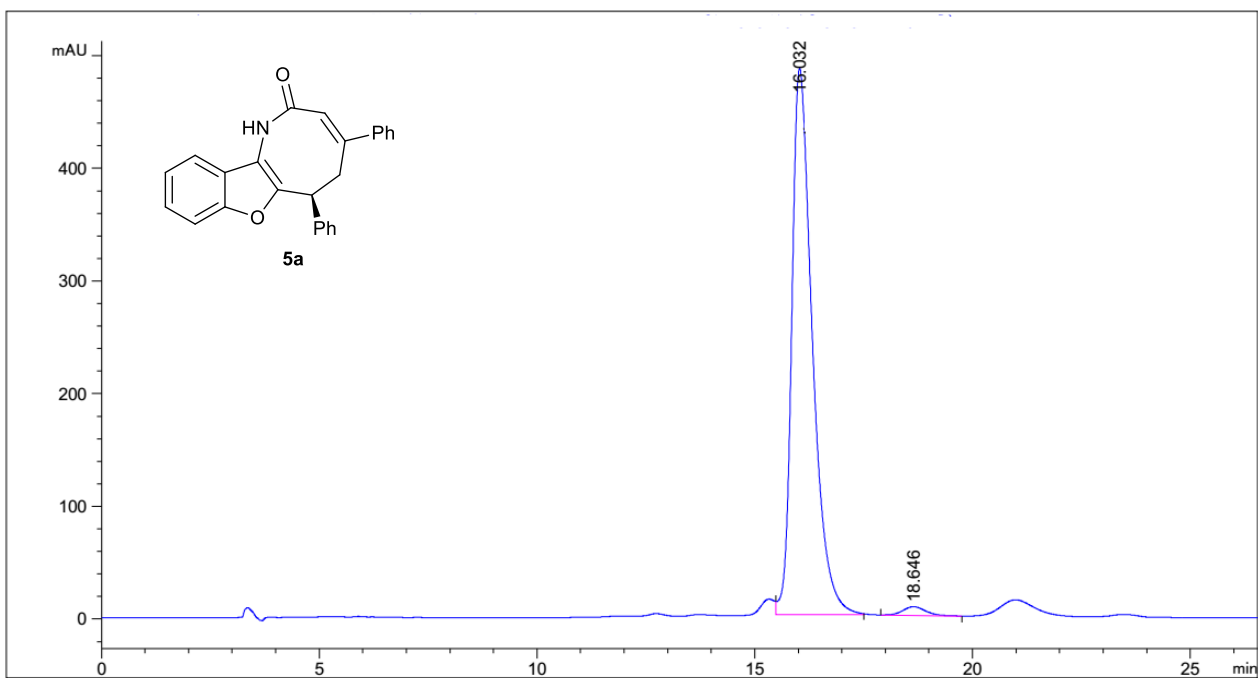

| # | [min]  |    | [min]  | [mAU*s]   | [mAU]     | %       |
|---|--------|----|--------|-----------|-----------|---------|
| 1 | 16.032 | MM | 0.5458 | 1.58771e4 | 484.78506 | 98.2839 |
| 2 | 18.646 | BB | 0.5505 | 277.22614 | 7.71047   | 1.7161  |
|   |        |    |        | 1.61544e4 | 492.49553 |         |

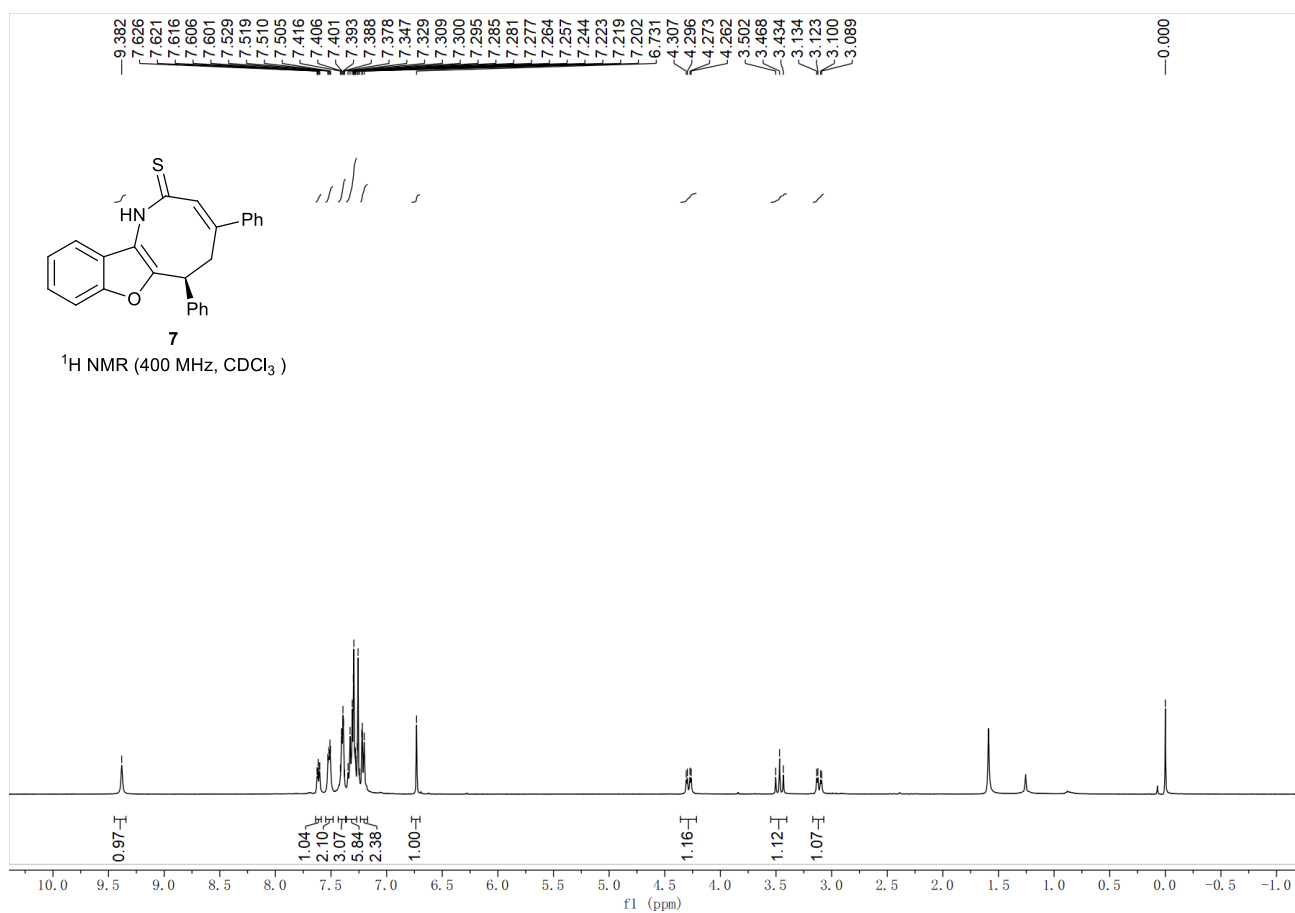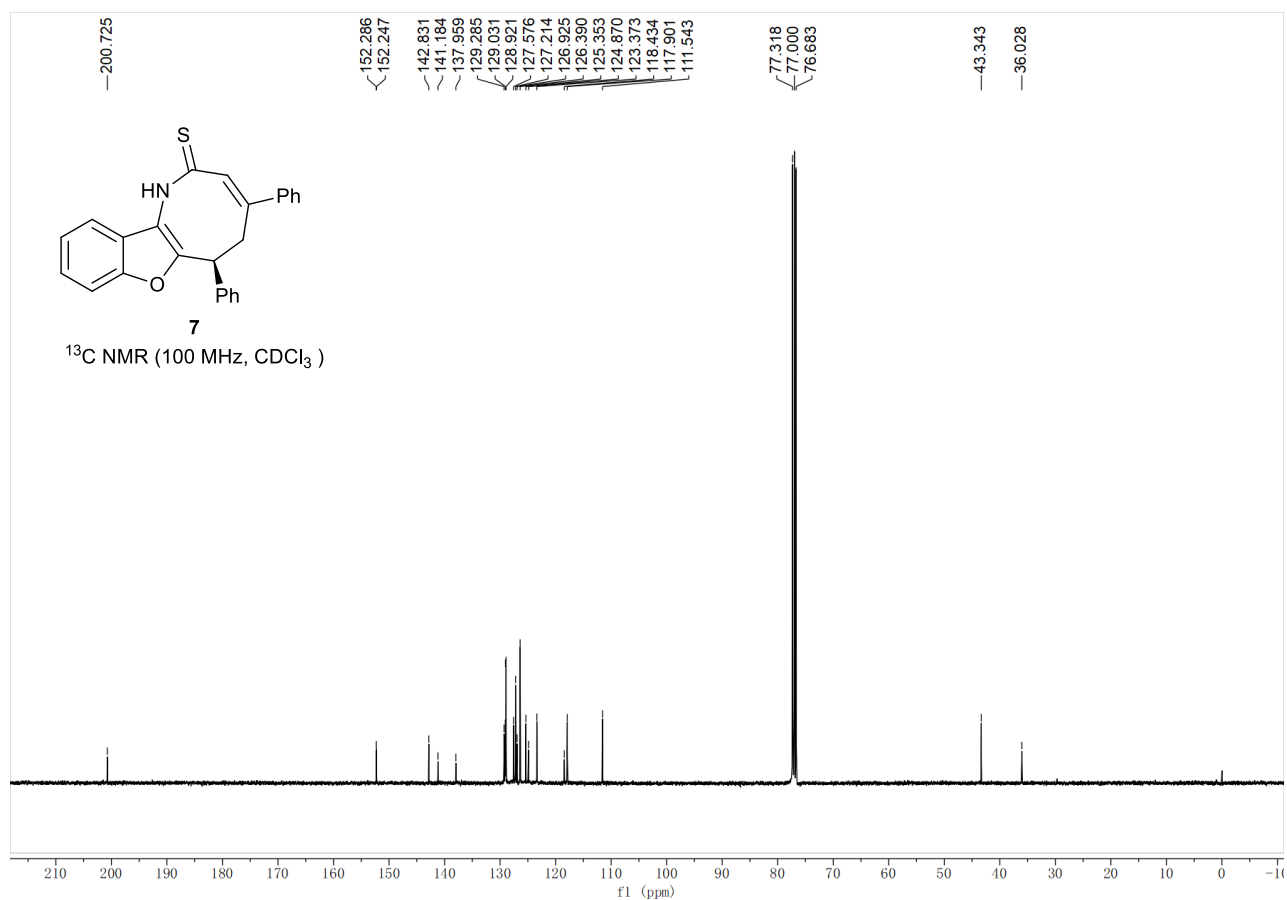



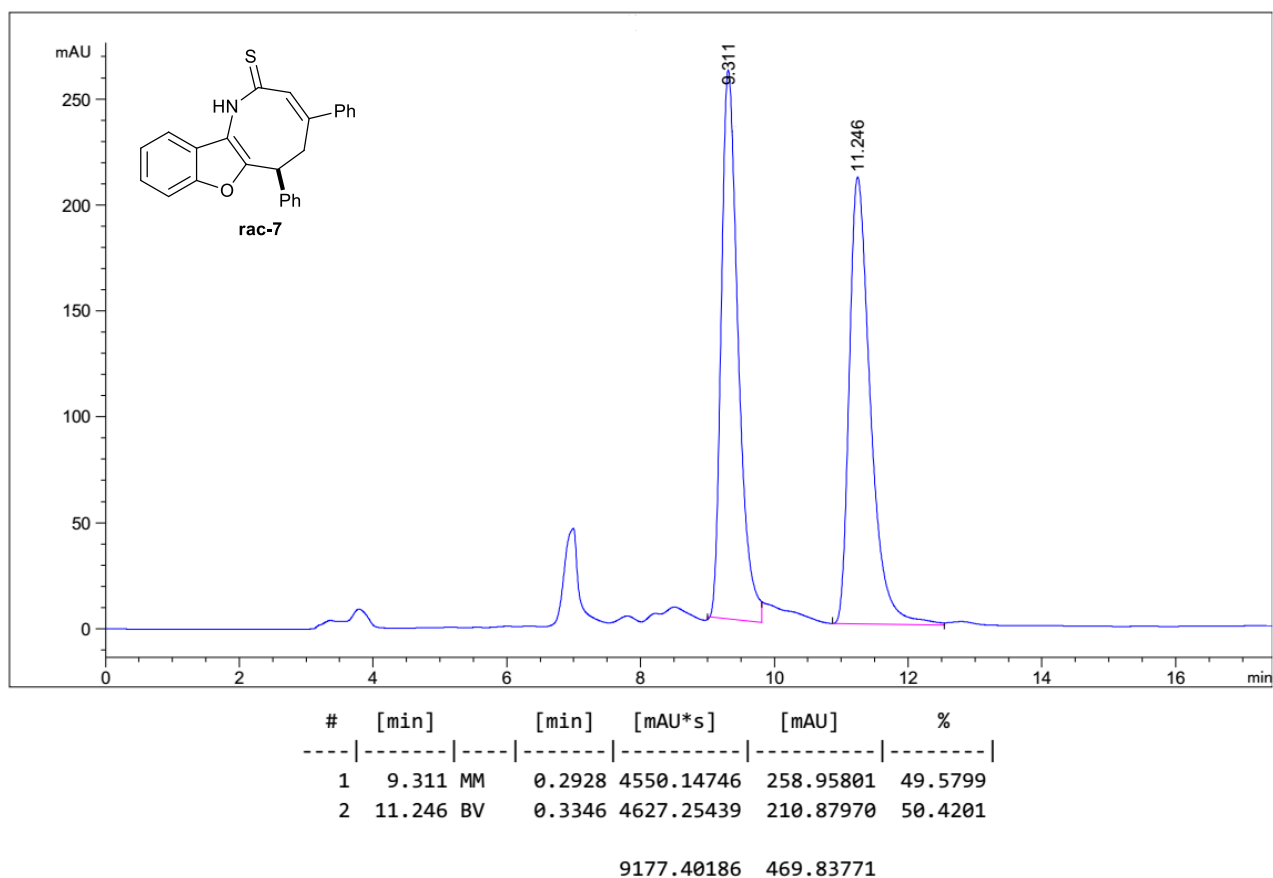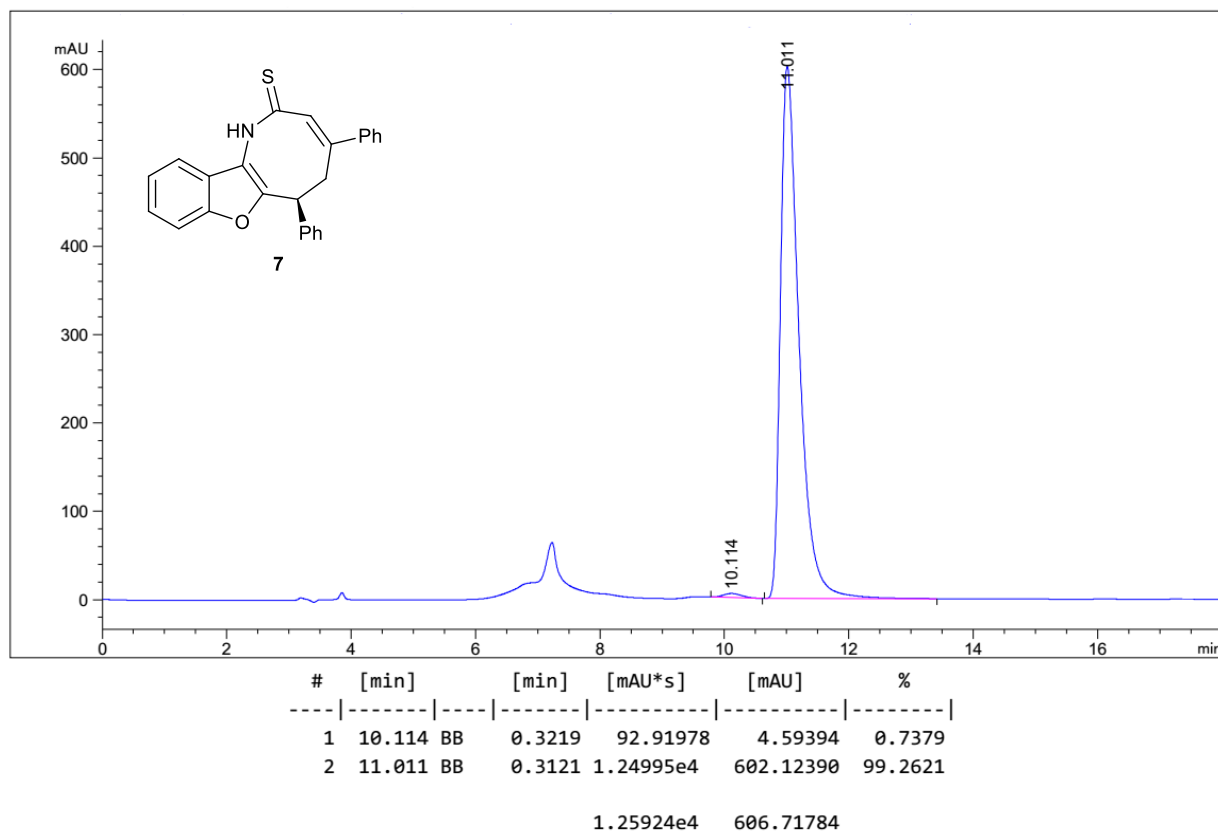

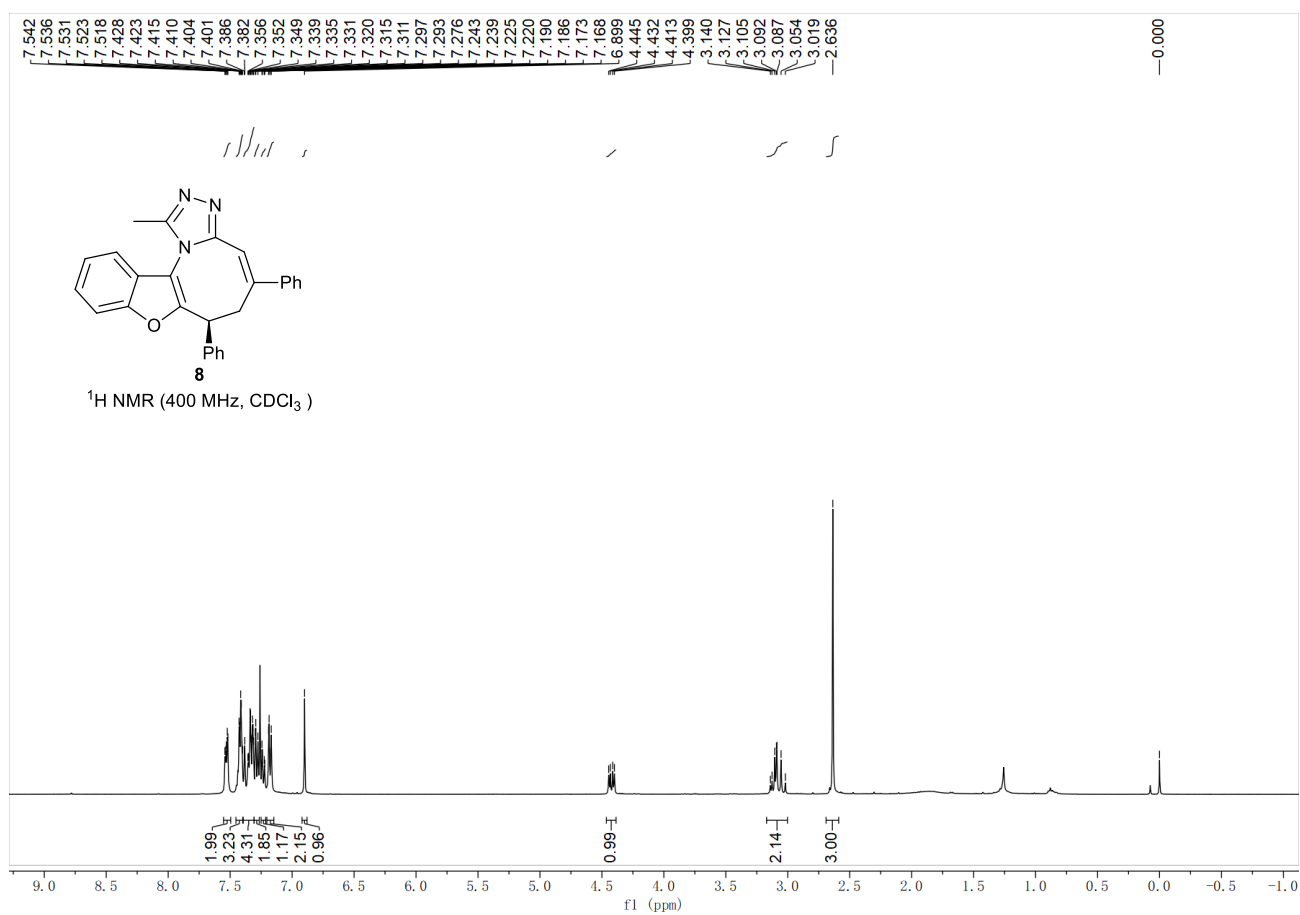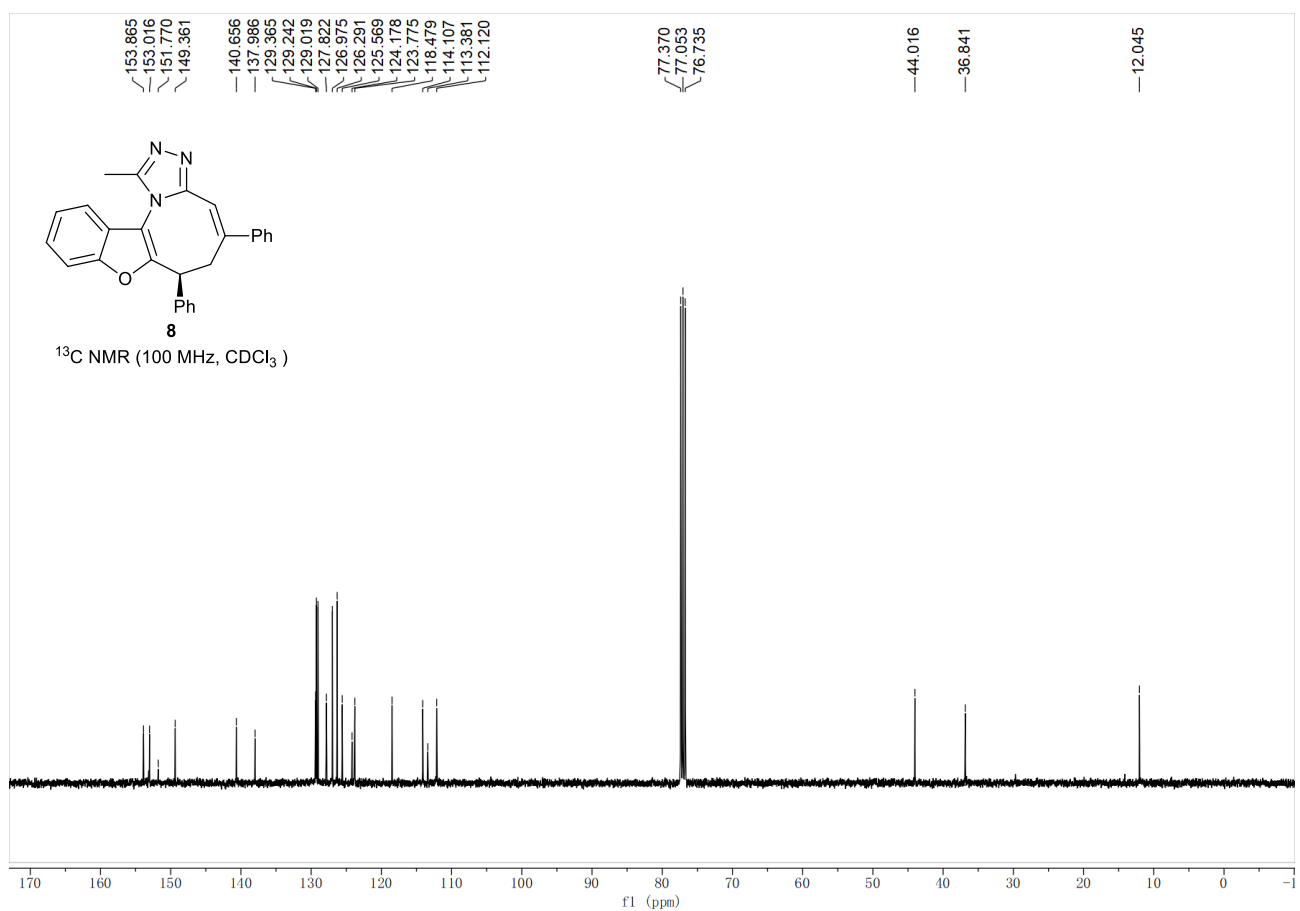

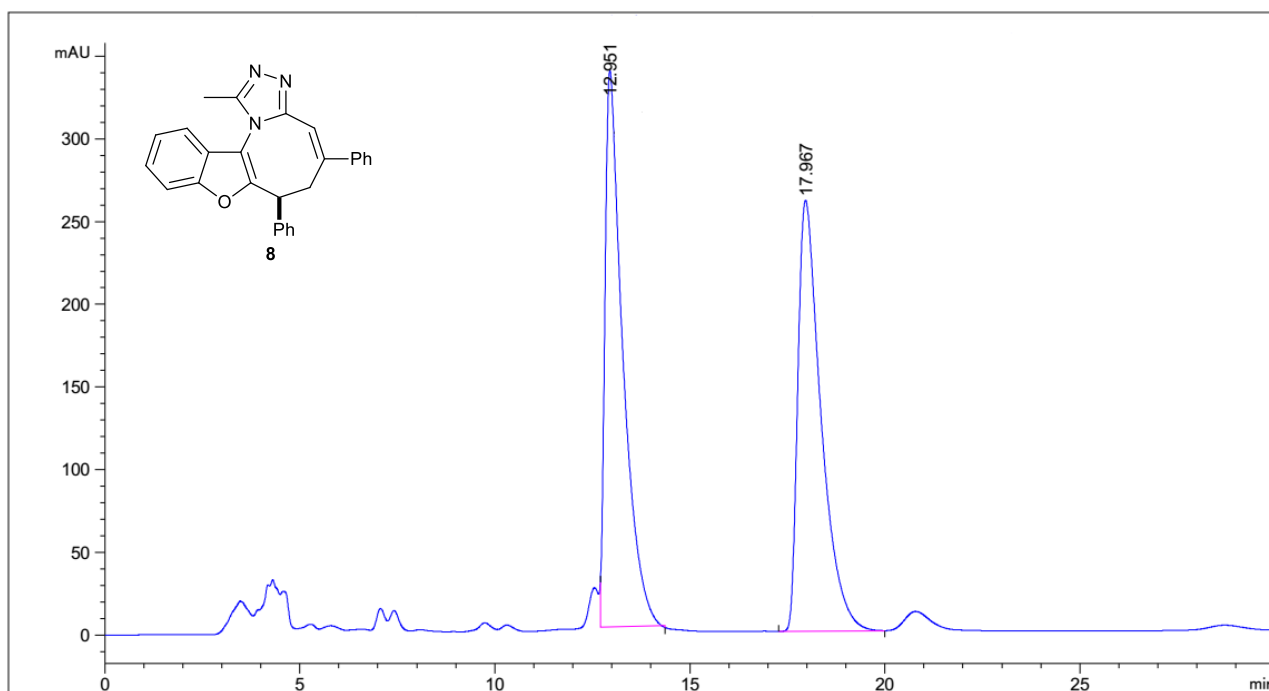

| # | [min]     | [min]  | [mAU*s]   | [mAU]     | %       |
|---|-----------|--------|-----------|-----------|---------|
| 1 | 12.951 MM | 0.5308 | 1.07195e4 | 336.58038 | 49.9223 |
| 2 | 17.967 BB | 0.6156 | 1.07529e4 | 260.48227 | 50.0777 |

2.14725e4 597.06265

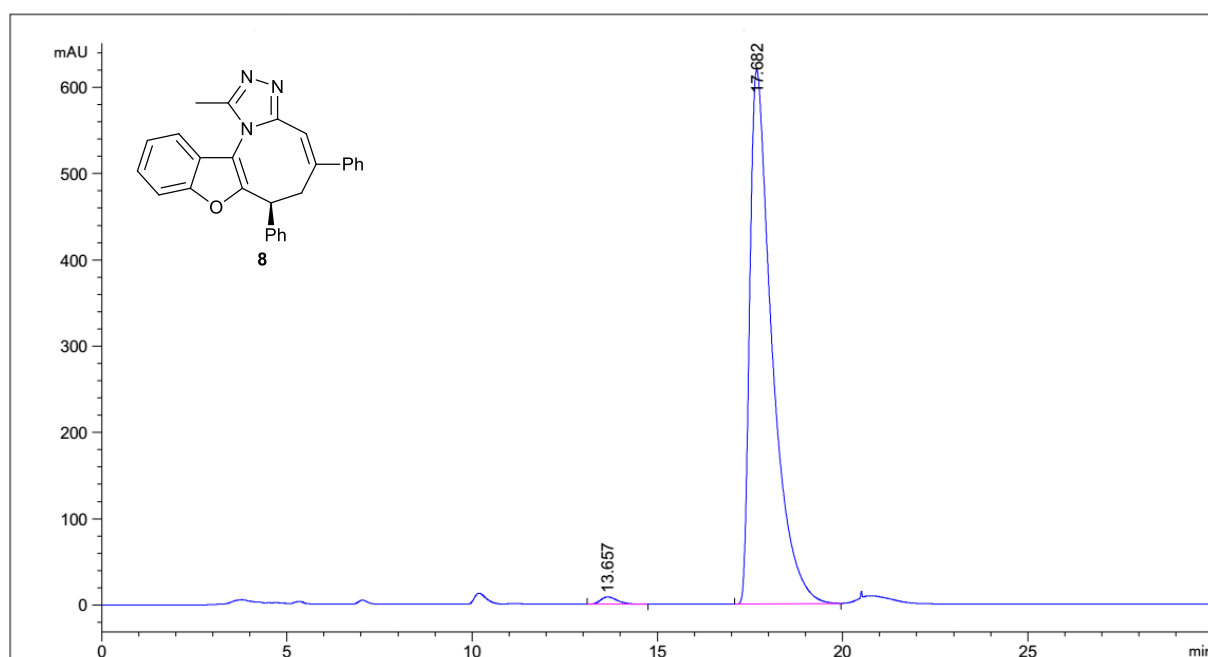

| # | [min]     | [min]  | [mAU*s]   | [mAU]     | %       |
|---|-----------|--------|-----------|-----------|---------|
| 1 | 13.657 BB | 0.4678 | 264.54446 | 8.50269   | 1.0156  |
| 2 | 17.682 BB | 0.6125 | 2.57828e4 | 619.14099 | 98.9844 |

2.60474e4 627.64368

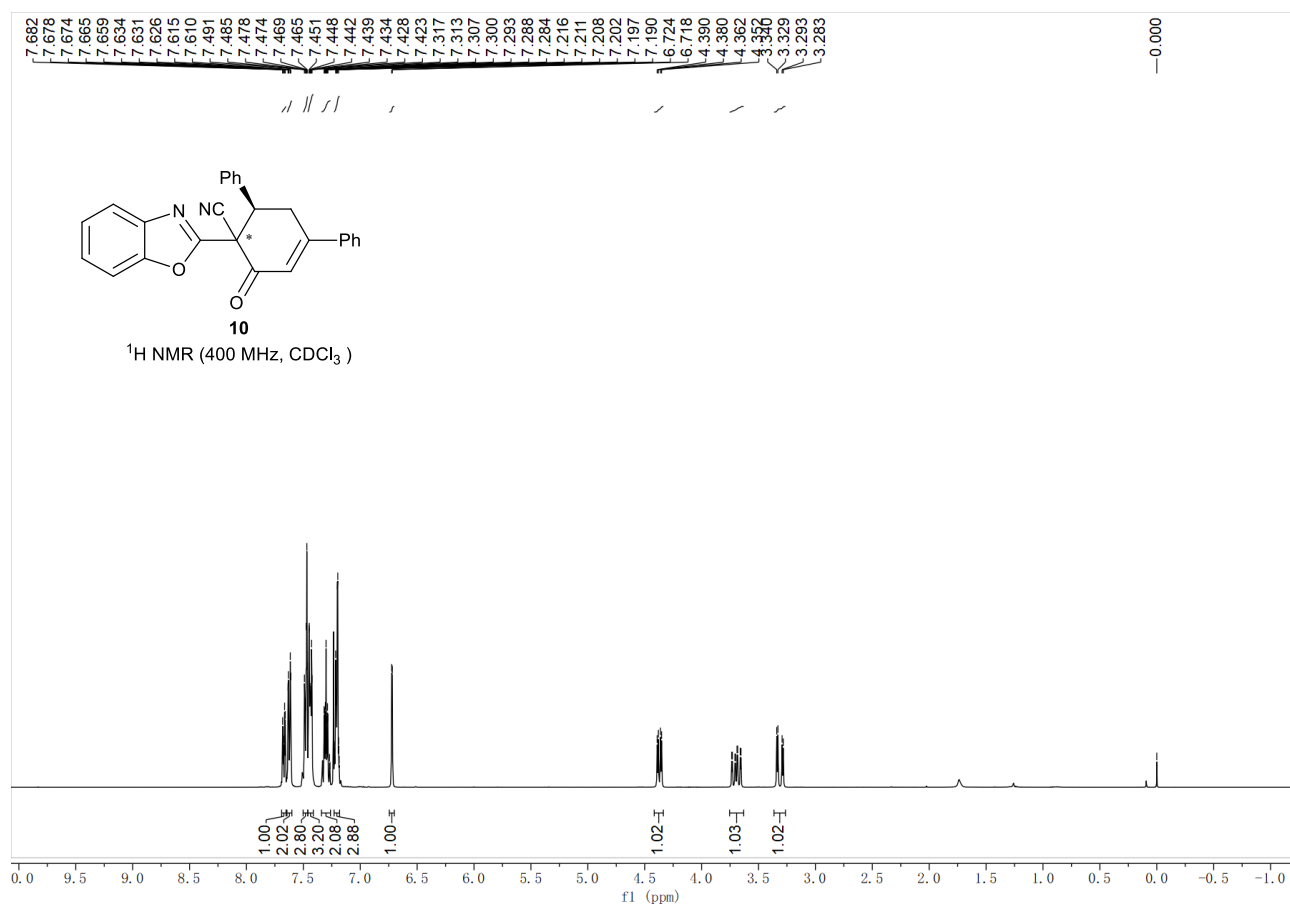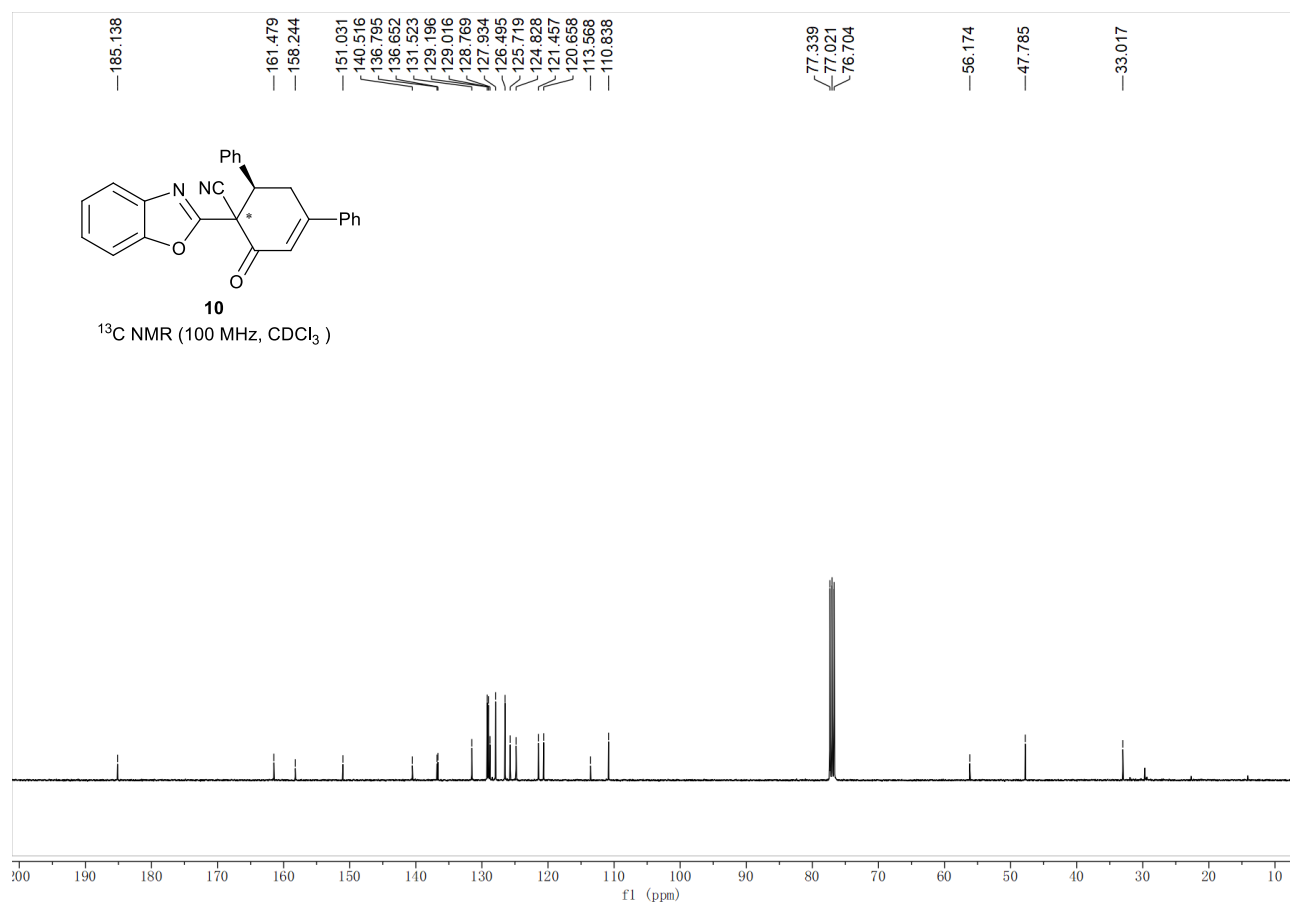

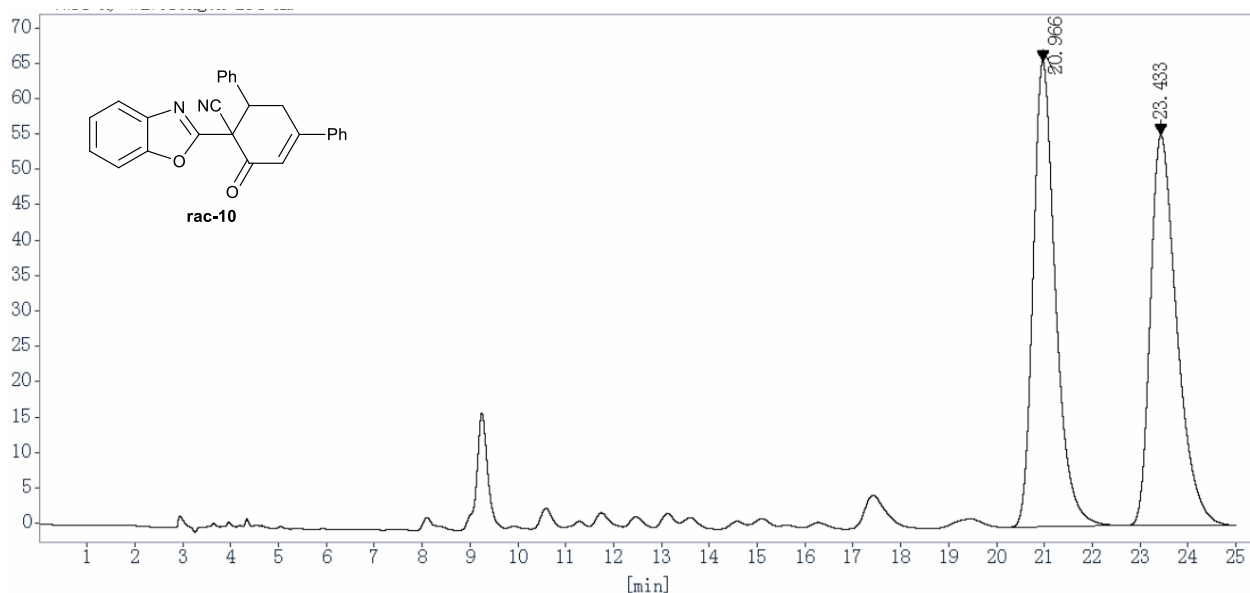

| Ret Time<br>[min] | Peak<br>Type | Width<br>[min] | Height<br>[mAU] | Area<br>[mAU*s] | Area<br>[%] |
|-------------------|--------------|----------------|-----------------|-----------------|-------------|
| 20.966            | BB           | 0.49           | 65.8056         | 2132.8022       | 50.1934     |
| 23.433            | BBA          | 0.58           | 55.1336         | 2116.3645       | 49.8066     |
| Totals:           |              |                |                 | 4249.1667       | 100.0000    |

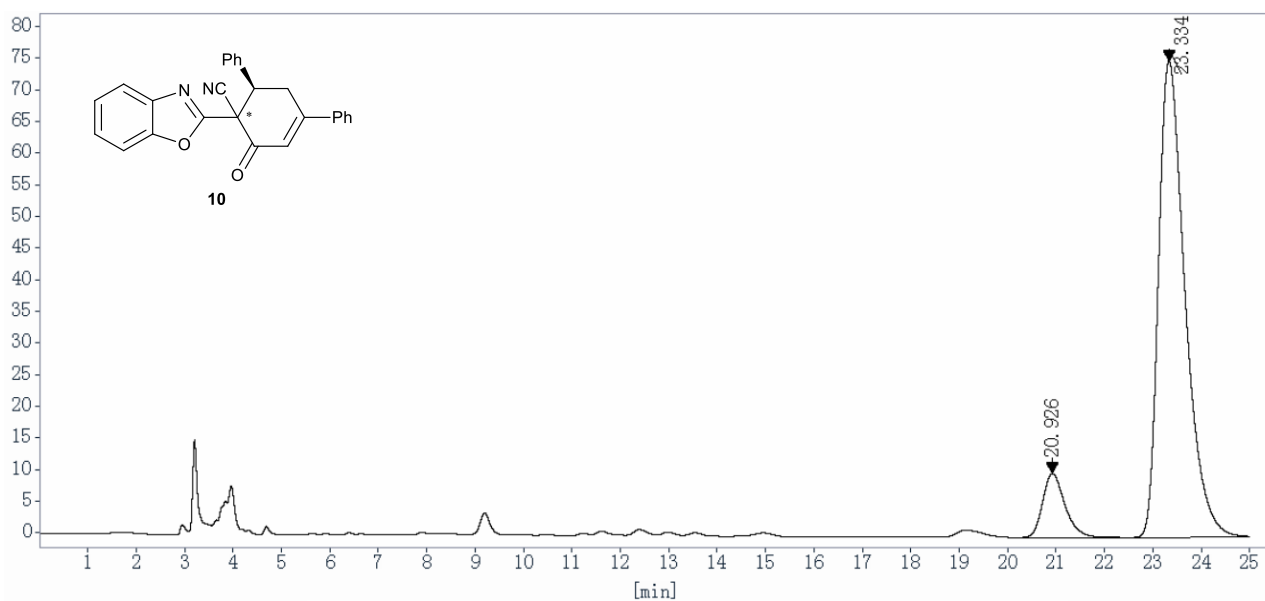

| Ret Time<br>[min] | Peak<br>Type | Width<br>[min] | Height<br>[mAU] | Area<br>[mAU*s] | Area<br>[%] |
|-------------------|--------------|----------------|-----------------|-----------------|-------------|
| 20.926            | BB           | 0.49           | 10.0844         | 323.3529        | 10.1765     |
| 23.334            | BBA          | 0.58           | 75.2440         | 2854.0901       | 89.8235     |
| Totals:           |              |                |                 | 3177.4430       | 100.0000    |

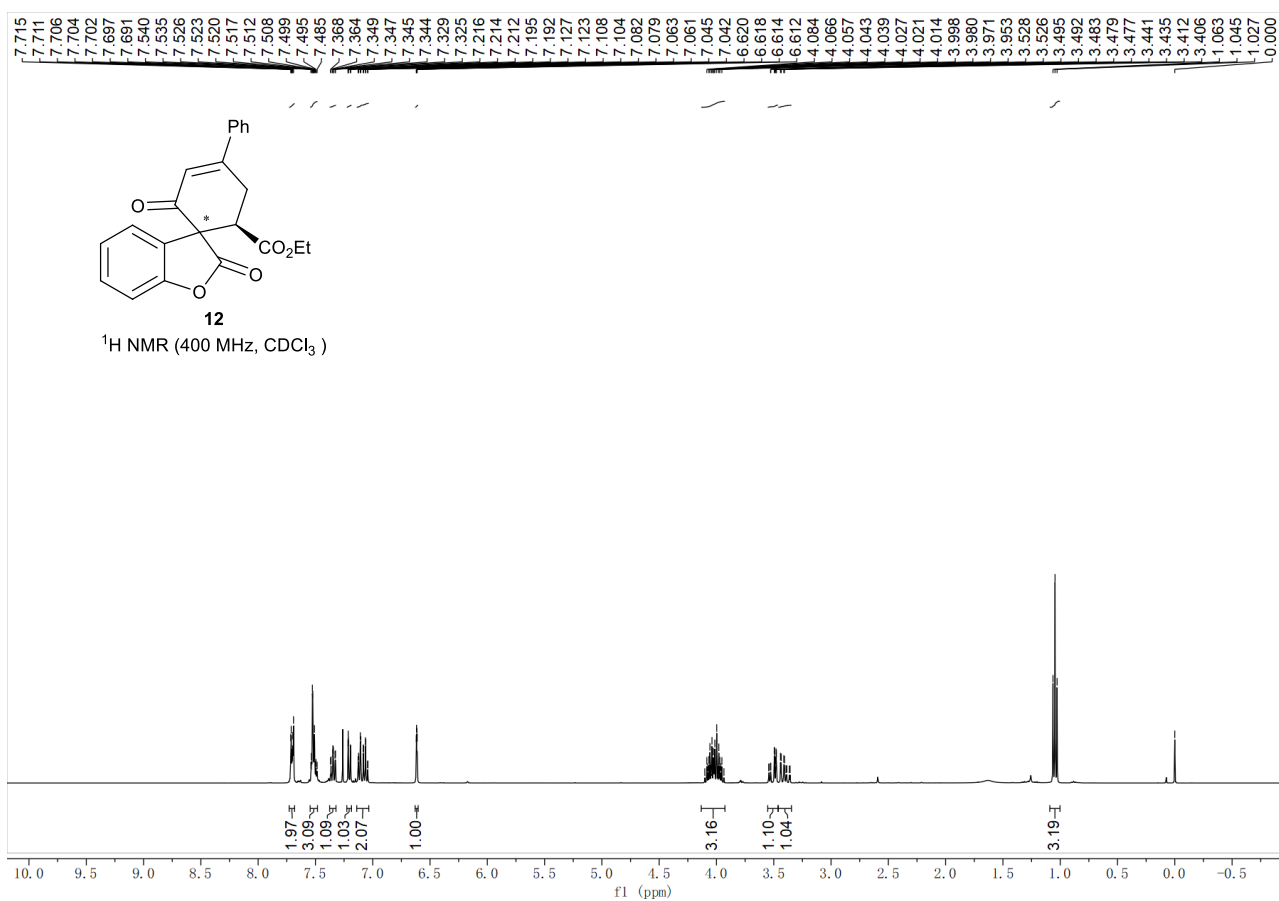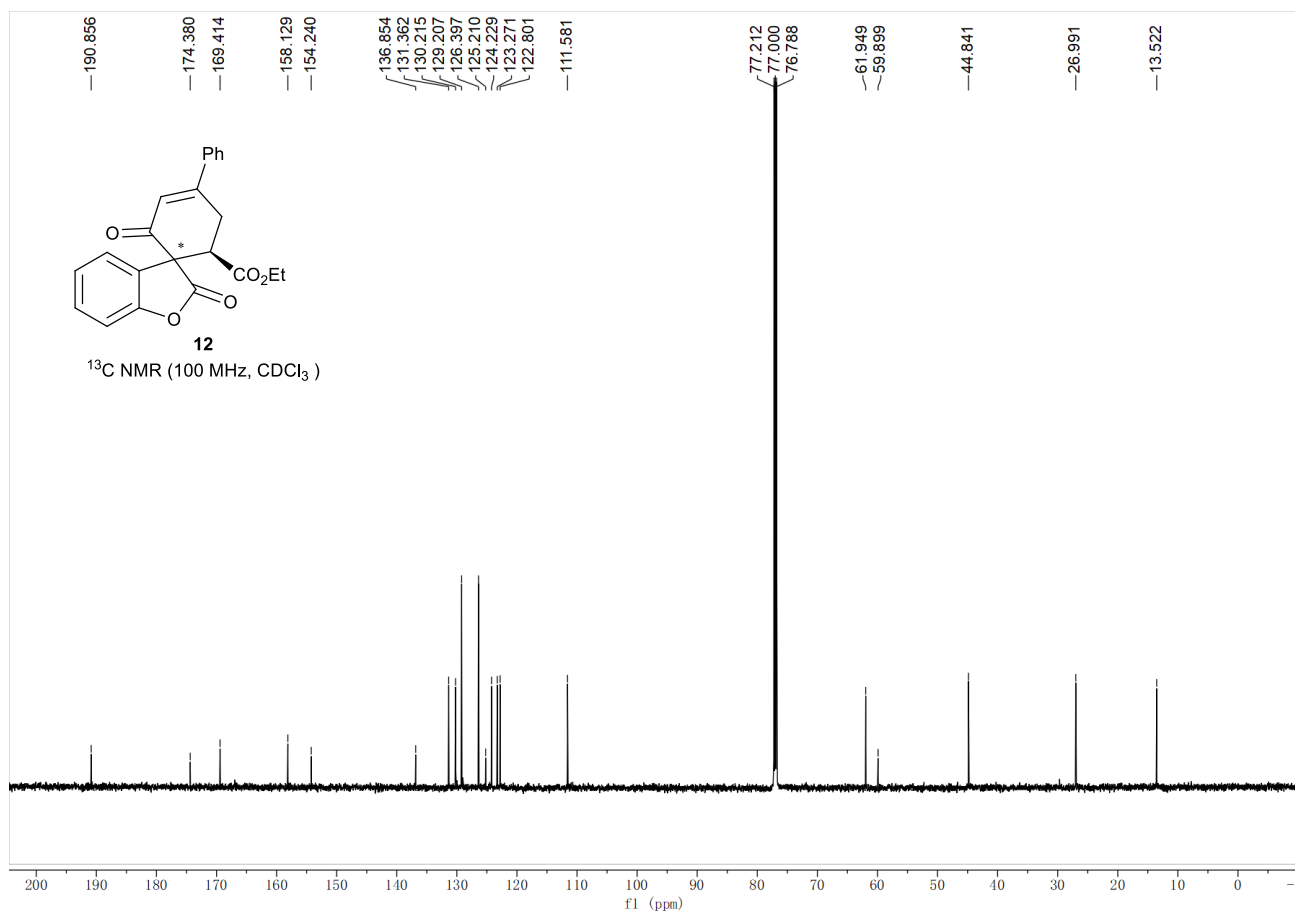

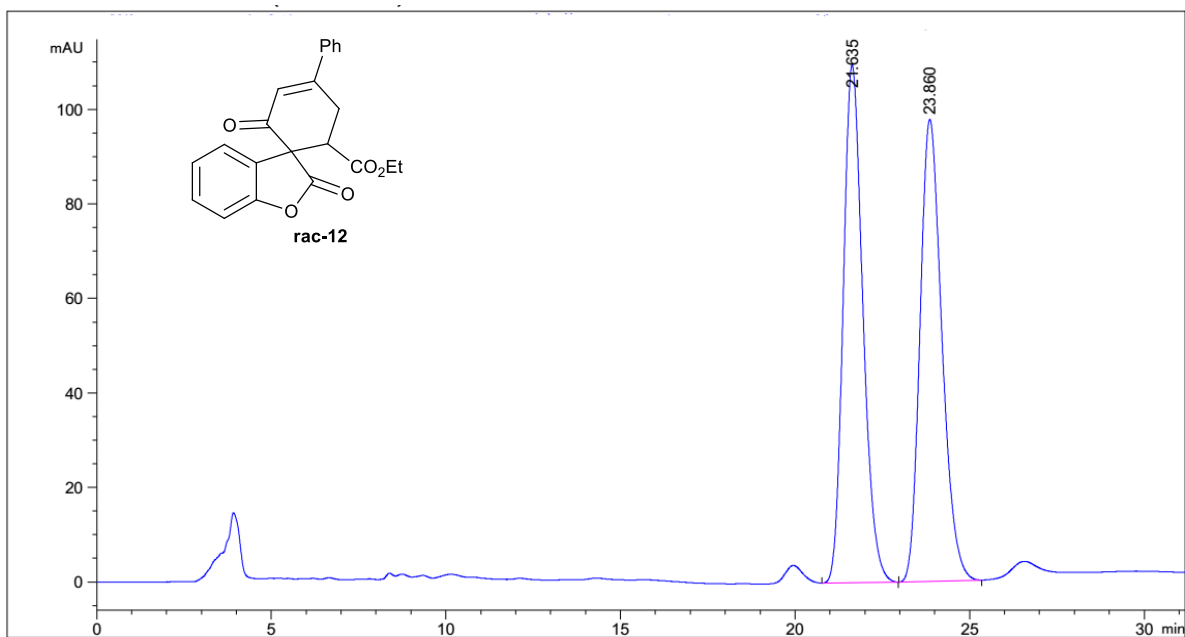

| # | [min]  |    | [min]  | [mAU*s]    | [mAU]     | %       |
|---|--------|----|--------|------------|-----------|---------|
| 1 | 21.635 | BB | 0.6044 | 4281.87988 | 109.56980 | 50.2005 |
| 2 | 23.860 | BB | 0.6686 | 4247.67480 | 97.74590  | 49.7995 |

8529.55469 207.31570

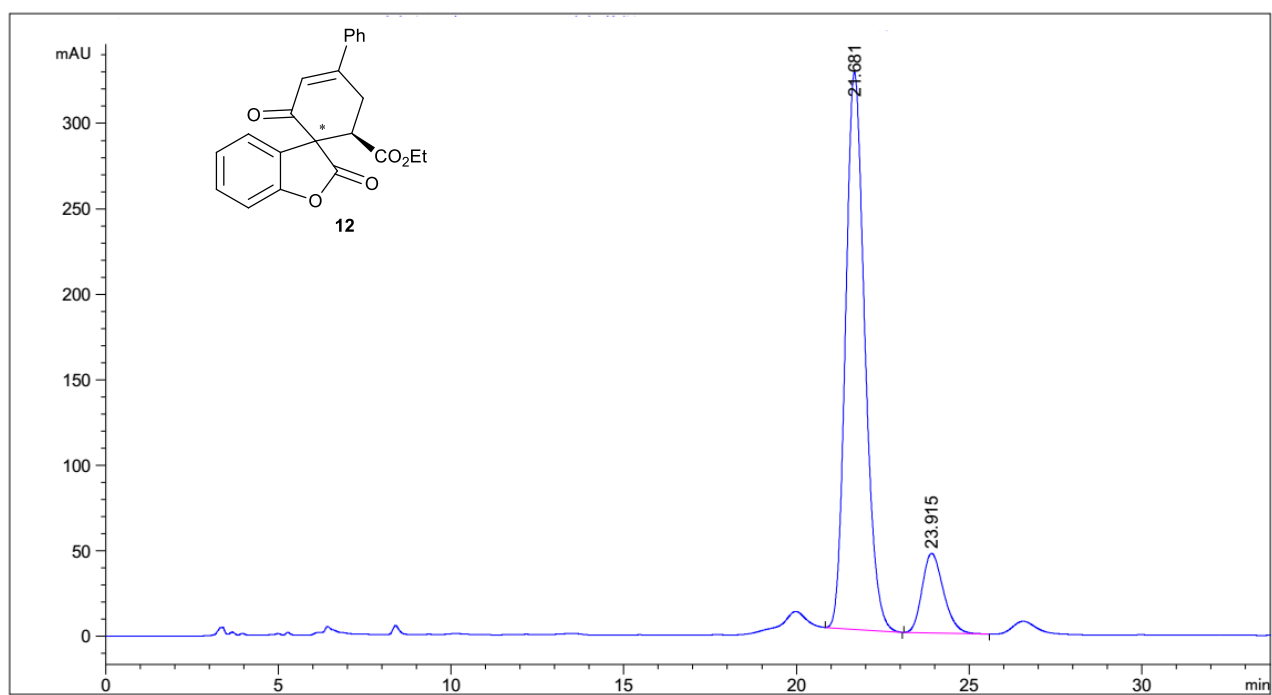

| # | [min]  |    | [min]  | [mAU*s]    | [mAU]     | %       |
|---|--------|----|--------|------------|-----------|---------|
| 1 | 21.681 | BB | 0.5941 | 1.25764e4  | 326.07428 | 86.3117 |
| 2 | 23.915 | BB | 0.6619 | 1994.50977 | 46.64372  | 13.6883 |

1.45709e4 372.71800

S107
